# Supplementary material for: A prospective observational study of community-acquired bacterial bloodstream infections in Metro Manila, the Philippines
Source: PLoS Negl Trop Dis. 2022 May 25;16(5):e0010414. doi: 10.1371/journal.pntd.0010414 (PMC9173634; doi:10.1371/journal.pntd.0010414)
Supplement: S1 Data — (XLSX) [file pntd.0010414.s003.xlsx]

## Sheet: BacteremiaStudy
sid	dengue	dob	age	ageg	sex	doa	sea	due	doe	dofs	dus	dodefever	dod	dua	bc1vol	bc2vol	bc_bottletype	urine	dourine	region	ncr	area	income	edu	regmed	pregnant	com	Underlying disease	alcho	smoking	packsmoking	medi	abxb	duoabxb	dolastabx	dulastabx	timelastabx	abxclass	abxname	resource	presc	refer	headache	rigor	skin redness	rash	cough/sputum	dyspnea	Bloody diarrhea (mucus)
8	0	1954-02-05	61	3	0	2015-07-01	1	0	2015-07-01	2015-06-25	7	2015-07-02	2015-07-05	5	65.9	66.8		0		NCR	Manila	0	<5000 PHP	Secondly	0	0	0		0	0		1	0	0							0	0	0	0	0	0	0	0	0
9	0	2004-04-21	11	2	1	2015-07-02	1	0	2015-07-02	2015-06-28	5	2015-07-03	2015-07-14	13	0	0		0		NCR	Manila	0	<5000 PHP	Secondly	0	0	0		0	0		1	1	2	2015-07-02	0	08:00:00	Chloramphenicol	Chloramphenicol	Pharmacy	9	1	0	1	0	0	1	1	0
10	0	2012-09-25	2	1	1	2015-07-02	1	0	2015-07-02	2015-06-28	5	2015-07-02	2015-07-04	3	0	0		0		NCR	Malabon	1	<5000 PHP	Primary	0	0	0		0	0		1	1	3	2015-07-01	1	06:00:00	Co-trimo	Co-trimoxazole	Pharmacy	9	0	0	0	1	0	1	1	0
11	0	2011-07-21	3	1	0	2015-07-02	1	0	2015-07-02	2015-06-30	3	2015-07-03	2015-07-05	4	0	0		0		NCR	Caloocan	1	<5000 PHP	Secondly	0	0	0		0	0		1	1	2	2015-07-02	0	06:00:00	B-lactamase Inhibitors	Co-Amoxiclav	Pharmacy	9	0	1	0	0	0	0	0	0
12	0	1989-08-24	25	3	1	2015-07-03	1	0	2015-07-03	2015-06-20	14	2015-07-04	2015-07-09	7	0	0		0		Region 3		2	5000-10000 PHP	Tertiary	0	0	0		2	1	1	1	1	1	2015-07-03	0	01:00:00	Unknown	Unknown	Pharmacy	9	0	0	0	1	1	0	0	0
13	0	1977-05-02	38	3	1	2015-07-03	1	0	2015-07-03	2015-06-26	8	2015-07-03	2015-07-05	3	0	0		1	2015-07-03	NCR	Manila	0	5000-10000 PHP	Tertiary	0	0	0		2	1	1	1	0	0							0	0	1	1	0	0	0	1	0
14	0	1977-05-20	38	3	1	2015-07-07	1	0	2015-07-07	2015-07-01	7	2015-07-08	2015-07-11	5	65.5	67.7		1	2015-07-07	NCR	Paranaque	1	5000-10000 PHP	Vocational	0	0	0		0	0		1	0	0							0	0	1	0	0	0	1	1	0
15	0	1994-03-05	21	3	0	2015-07-07	1	0	2015-07-07	2015-07-04	4	2015-07-09	2015-07-11	5	0	0		1	2015-07-07	Region 4		2	5000-10000 PHP	Secondly	0	0	0		2	0		1	0	0							0	0	1	0	0	0	0	0	0
16	0	1987-05-27	28	3	0	2015-07-07	1	1	2015-07-08	2015-07-03	5	2015-07-08	2015-07-10	4	0	0		0		NCR	Manila	0	<5000 PHP	Secondly	0	0	0		2	1	2	1	1	1	2015-07-07	0	07:00:00	Fluoroqunolones	Ciprofloxacin	Private Clinic	1	1	1	1	0	0	1	0	0
17	0	2009-07-20	5	2	1	2015-07-08	1	0	2015-07-08	2015-07-05	4	2015-07-09	2015-07-12	5	66.2	0		1	2015-07-08	NCR	Valenzuela	1	5000-10000 PHP	Primary	1	0	0		0	0		1	0	0							0	0	1	0	0	0	0	1	0
18	0	1999-06-19	16	2	0	2015-07-09	1	0	2015-07-09	2015-07-07	3	2015-07-10	2015-07-16	8	0	0		1	2015-07-09	NCR	Navotas	1	5000-10000 PHP	Tertiary	0	0	1	lung disease	0	0		1	0	0							0	0	1	1	0	0	1	1	0
19	0	2005-05-18	10	2	0	2015-07-13	1	0	2015-07-13	2015-07-11	3	2015-07-14	2015-07-16	4	64.4	63.2		1	2015-07-13	NCR	Malabon	1	<5000 PHP	Primary	0	0	0		0	0		1	0	0							0	0	0	0	0	0	0	0	0
20	0	1986-10-14	28	3	1	2015-07-14	1	0	2015-07-14	2015-07-08	7	2015-07-15	2015-07-20	7	65.3	65.9		1	2015-07-14	NCR	Navotas	1	5000-10000 PHP	Secondly	0	0	0		0	0		0	0	0							0	0	1	1	0	0	0	0	0
21	0	1947-06-30	68	3	1	2015-07-14	1	0	2015-07-14	2015-07-10	5	2015-07-15	2015-07-20	7	0	62.3		1	2015-07-15	NCR	Manila	0	5000-10000 PHP	Secondly	0	0	0		1	1		0	0	0							0	1	1	1	0	0	1	0	0
22	0	2013-07-20	1	1	1	2015-07-14	1	0	2015-07-14	2015-07-08	7	2015-07-15	2015-07-23	10	0	62.8		1	2015-07-14	Region 3		2	5000-10000 PHP	Secondly	1	0	1	lung disease;others	0	0		0	0	0							0	1	1	0	0	0	1	0	0
23	0	1960-04-05	55	3	1	2015-07-15	1	0	2015-07-15	2015-07-02	14	2015-07-16	2015-07-23	9	0	0		1	2015-07-15	Region 4		2	5000-10000 PHP	Secondly	0	0	0		2	0		1	1	2	2015-07-13	2	07:00:00	Penicillines	Amoxicillin	Pharmacy	0	0	0	0	0	0	1	1	0
24	0	1985-08-22	29	3	1	2015-07-21	1	0	2015-07-21	2015-07-20	2	2015-07-22	2015-07-26	6	0	66.4		0		NCR	Manila	0	<5000 PHP	Secondly	0	0	0		0	0		1	0	0							0	1	1	0	0	0	1	1	0
25	0	1996-02-16	19	3	0	2015-07-21	1	0	2015-07-21	2015-07-19	3	2015-07-23	2015-07-27	7	0	63.5		1	2015-07-21	NCR	Manila	0	15000-20000 PHP	Tertiary	0	0	0		0	0		1	1	1	2015-07-21	0	05:00:00	Penicillines	Amoxicillin	Pharmacy	0	0	1	0	1	1	0	0	0
26	0	1975-03-17	40	3	0	2015-07-21	1	0	2015-07-21	2015-07-01	21	2015-07-25	2015-07-29	9	0	66.3		1	2015-07-21	Region 3		2	<5000 PHP	Secondly	0	0	0		1	1	2	1	0	0							0	0	1	0	1	1	1	1	0
27	0	1950-02-26	65	3	1	2015-07-21	1	0	2015-07-21	2015-07-15	7	2015-08-02	2015-08-07	18	0	0		0		Region 4		2	<5000 PHP	Primary	0	0	0		2	1	4	1	0	0							0	0	0	0	0	0	0	0	0
28	0	1974-05-18	41	3	1	2015-07-22	1	0	2015-07-22	2015-07-17	6	2015-07-23	2015-07-26	5	0	63.3		1	2015-07-22	NCR	Manila	0	<5000 PHP	Secondly	0	0	0		1	0		1	1	1	2015-07-22	0	06:00:00	Unknown	Unknown	Pharmacy	9	1	1	0	0	0	1	1	0
29	0	1995-03-05	20	3	1	2015-07-22	1	0	2015-07-22	2015-07-19	4	2015-07-23	2015-07-31	10	0	65.5		1	2015-07-22	NCR	Navotas	1	<5000 PHP	Secondly	0	0	0		2	0		1	1	1	2015-07-22	0	04:00:00	Tetracyclines	Doxycycline	Other Hospital	1	1	1	0	0	0	1	1	0
30	0	1964-06-24	51	3	1	2015-07-22	1	0	2015-07-22	2015-07-18	5	2015-07-23	2015-07-29	8	0	0		0		NCR	Manila	0	5000-10000 PHP	Secondly	0	0	0		1	0		1	0	0							0	1	0	0	0	0	1	1	0
31	0	1959-10-04	55	3	1	2015-07-22	1	0	2015-07-22	2015-07-18	5	2015-07-23	2015-07-29	8	0	62.6		1	2015-07-22	NCR	Manila	0	15000-20000 PHP	Vocational	0	0	0		1	0		1	0	0							0	1	1	0	0	0	0	0	0
32	0	1989-07-12	26	3	1	2015-07-22	1	0	2015-07-22	2015-07-19	4	2015-07-23	2015-07-29	8	0	64.1		1	2015-07-22	NCR	Valenzuela	1	15000-20000 PHP	Secondly	1	0	0		1	0		1	0	0							0	0	1	0	0	0	0	1	0
33	0	1987-09-28	27	3	1	2015-07-22	1	0	2015-07-22	2015-07-09	14	2015-07-23	2015-07-30	9	0	64.5		1	2015-07-22	NCR	Caloocan	1	<5000 PHP	Secondly	0	0	0		2	1	1	1	1	1	2015-07-22	0	11:00:00	Unknown	Unknown	Pharmacy	9	0	1	1	0	0	1	1	0
34	0	2007-10-26	7	2	1	2015-07-22	1	0	2015-07-22	2015-07-16	7	2015-07-25	2015-07-31	10	0	62		0		NCR	Caloocan	1	<5000 PHP	Secondly	0	0	0		0	0		1	0	0							0	1	1	1	0	0	0	0	0
35	0	1985-08-01	29	3	1	2015-07-22	1	0	2015-07-22	2015-07-20	3	2015-07-26	2015-08-07	17	0	63.4		1	2015-07-22	NCR	Manila	0	<5000 PHP	Secondly	0	0	1	others	1	1	2	0	0	0							0	0	1	1	0	0	0	1	0
36	0	1962-03-28	53	3	1	2015-07-23	1	0	2015-07-23	2015-07-18	6	2015-07-25	2015-07-28	6	0	65.8		1	2015-07-23	Region 1		2	<5000 PHP	Secondly	0	0	0		2	0		1	0	0							0	1	0	0	1	0	0	0	0
37	0	1997-02-07	18	3	1	2015-07-23	1	0	2015-07-23	2015-07-10	14	2015-08-09	2015-08-21	30	0	66		1	2015-07-23	NCR	Manila	0	<5000 PHP	Primary	0	0	0		1	1	2	1	0	0							0	0	1	0	0	0	1	1	0
38	0	1969-09-21	45	3	1	2015-07-27	1	0	2015-07-27	2015-07-23	5	2015-07-28	2015-07-31	5	0	0		1	2015-07-27	NCR	Caloocan	1	<5000 PHP	Primary	0	0	0		0	0		0	0	0							0	1	0	0	0	0	0	0	0
39	0	1990-10-21	24	3	1	2015-07-27	1	0	2015-07-27	2015-07-14	14	2015-07-30	2015-08-02	7	0	0		1	2015-07-27	NCR	Paranaque	1	5000-10000 PHP	Secondly	0	0	0		1	1	2	0	0	0							0	1	1	0	0	0	0	1	0
40	0	1979-10-29	35	3	1	2015-07-27	1	0	2015-07-27	2015-07-22	6	2015-07-28	2015-08-03	8	0	65.2		0		NCR	Manila	0	<5000 PHP	Tertiary	0	0	0		1	0		1	0	0							0	1	0	0	0	0	0	0	0
41	0	2012-07-28	3	1	1	2015-07-28	1	0	2015-07-28	2015-07-23	6	2015-07-29	2015-08-03	7	0	0		0		NCR	Caloocan	1	<5000 PHP	none	0	0	1	lung disease	0	0		0	0	0							0	1	0	0	0	0	1	1	0
42	0	1952-01-12	63	3	0	2015-07-28	1	0	2015-07-28	2015-07-15	14	2015-07-29	2015-08-04	8	0	63.1		0		NCR	Quezon	1	<5000 PHP	Primary	0	0	0		0	0		1	0	0							0	0	0	0	1	0	1	0	0
43	0	1997-10-06	17	2	1	2015-07-28	1	0	2015-07-28	2015-07-22	7	2015-07-24	2015-08-03	7	0	64		1	2015-07-28	NCR	Caloocan	1	5000-10000 PHP	Tertiary	0	0	0		1	0		1	0	0							0	0	0	0	0	0	1	0	0
44	0	2000-03-16	15	2	1	2015-07-28	1	0	2015-07-28	2015-07-12	17	2015-08-26	2015-08-30	34	0	64.5		1	2015-07-28	NCR	Malabon	1	<5000 PHP	Secondly	0	0	0		0	0		1	1	14	2015-07-27	1		Chloramphenicol	Chloramphenicol	Pharmacy	1	1	1	0	0	0	0	1	0
45	0	1994-11-16	20	3	0	2015-07-28	1	1	2015-07-29	2015-07-22	7	2015-07-29	2015-08-03	7	0	63.3		1	2015-07-29	NCR	Navotas	1	10000-15000 PHP	Vocational	0	0	1	others	2	0		1	1	2	2015-07-28	0	10:00:00	Unknown	Unknown	Pharmacy	9	0	1	0	0	0	1	0	0
46	0	1999-09-15	15	2	1	2015-07-29	1	0	2015-07-29	2015-07-25	5	2015-07-30	2015-08-03	6	0	64.4		1	2015-07-29	NCR	Caloocan	1	<5000 PHP	Secondly	0	0	0		0	0		1	0	0							0	0	1	0	0	0	1	0	0
47	0	1949-08-06	65	3	0	2015-07-30	1	0	2015-07-30	2015-07-21	10	2015-07-31	2015-08-02	4	0	65.8		1	2015-07-30	NCR	Manila	0	<5000 PHP	Primary	1	0	1	diabetes;heart disease	0	0		1	0	0							0	0	0	0	0	0	0	0	0
48	0	1998-07-14	17	2	1	2015-07-31	1	0	2015-07-31	2015-07-26	6	2015-08-05	2015-08-08	9	0	0		0		NCR	Taguig	1	<5000 PHP	Tertiary	0	0	0		0	0		1	0	0							0	0	0	0	0	0	1	0	0
49	0	2012-03-06	3	1	1	2015-07-31	1	0	2015-07-31	2015-07-18	14	2015-08-01	2015-08-08	9	0	0		0		NCR	Manila	0	5000-10000 PHP	none	0	0	0		0	0		1	1	6	2015-07-30	1	21:00:00	Cephalosporines	Cefixime	Pharmacy	9	1	0	0	0	0	1	0	0
50	0	1995-04-20	20	3	0	2015-08-03	1	0	2015-08-03	2015-07-28	7	2015-08-04	2015-08-11	9	0	0		0		NCR	Manila	0	10000-15000 PHP	Tertiary	0	0	1	others	2	0		1	1	6	2015-08-03	0	08:00:00	Co-trimo	Co-trimoxazole	Pharmacy	9	0	0	0	0	1	0	0	0
51	0	1999-08-31	15	2	0	2015-08-04	1	0	2015-08-04	2015-08-02	3	2015-08-10	2015-08-11	8	0	0		0		NCR	Caloocan	1	<5000 PHP	Secondly	0	0	0		0	0		1	0	0							0	1	1	0	0	0	0	0	0
52	0	2005-01-20	10	2	0	2015-08-04	1	0	2015-08-04	2015-08-02	3	2015-08-05	2015-08-05	2	0	63.8		1	2015-08-04	Region 4		2	<5000 PHP	Secondly	0	0	0		0	0		0	0	0							0	0	1	0	0	0	0	1	0
53	0	2005-09-21	9	2	0	2015-08-05	1	0	2015-08-05	2015-08-02	4	2015-08-05	2015-08-18	14	0	64		1	2015-08-05	NCR	Quezon	1	<5000 PHP	Secondly	0	0	0		0	0		1	1	2	2015-08-04	1	08:00:00	Fluoroqunolones	Floaxacillin	Pharmacy	9	1	0	0	0	0	0	0	0
54	0	1964-10-03	50	3	0	2015-08-10	1	0	2015-08-10	2015-08-08	3	2015-08-10	2015-08-15	6	0	65.6		1	2015-08-10	NCR	Manila	0	<5000 PHP	Secondly	0	0	0		0	0		1	1	1	2015-08-10	0	08:00:00	Fluoroqunolones	Ciprofloxacin	Pharmacy	9	0	1	0	0	0	0	0	0
55	0	2002-12-26	12	2	1	2015-08-10	1	0	2015-08-10	2015-08-08	3	2015-08-10	2015-08-18	9	0	0		1	2015-08-10	NCR	Navotas	1	<5000 PHP	Secondly	0	0	0		0	0		1	0	0							0	1	0	0	0	0	1	1	0
56	0	1980-10-30	34	3	1	2015-08-13	1	0	2015-08-13	2015-07-31	14	2015-08-14	2015-09-12	31	65.8	66.5		0		NCR	Navotas	1	5000-10000 PHP	Secondly	0	0	0		1	0		1	1	1	2015-08-12	1	22:00:00	Lincomycines	Clindamycin	Pharmacy	9	0	0	0	0	0	1	1	0
57	0	2014-07-02	1	1	1	2015-08-13	1	0	2015-08-13	2015-08-07	7	2015-08-13	2015-08-18	6	63.5	0		0		Region 3		2	<5000 PHP	none	0	0	0		0	0		1	0	0							0	0	0	0	0	0	1	1	0
58	0	2004-11-10	10	2	1	2015-08-14	1	0	2015-08-14	2015-08-11	4	2015-08-18	2015-08-24	11	64.6	0		0		NCR	Manila	0	<5000 PHP	Secondly	0	0	0		0	0		1	0	0							0	1	1	1	0	0	1	1	0
59	0	1997-05-24	18	3	0	2015-08-17	1	0	2015-08-17	2015-08-17	1	2015-08-18	2015-08-21	5	0	64.5		0		NCR	Manila	0	5000-10000 PHP	Secondly	0	0	0		0	1		1	0	0							0	0	1	0	0	0	1	0	0
60	0	1968-10-20	46	3	1	2015-08-17	1	0	2015-08-17	2015-08-17	1	2015-08-17	2015-08-17	1	63.1	64.3		0		NCR	Manila	0	<5000 PHP	none	0	0	0		1	1		1	0	0							0	1	1	0	0	0	0	1	0
61	0	2000-01-20	15	2	1	2015-08-18	1	0	2015-08-18	2015-08-16	3	2015-08-23	2015-09-11	25	64	65.4		1	2015-08-19	NCR	Manila	0	<5000 PHP	Secondly	0	0	0		0	0		0	0	0							0	0	0	0	0	0	0	0	0
62	0	2007-01-05	8	2	0	2015-08-18	1	0	2015-08-18	2015-08-15	4	2015-08-19	2015-09-01	15	62.8	63.8		0		NCR	Manila	0	<5000 PHP	Secondly	1	0	1	others	0	0		1	1	1	2015-08-17	1	18:00:00	Cephalosporines	Cefuroxime	Pharmacy	9	0	0	0	0	0	1	1	0
63	0	2012-06-17	3	1	0	2015-08-19	1	0	2015-08-19	2015-08-15	5	2015-08-20	2015-08-24	6	62.4	0		1	2015-08-20	NCR	Caloocan	1	<5000 PHP	none	0	0	1	lung disease	0	0		1	0	0							0	0	0	0	0	0	1	1	0
64	0	1997-05-19	18	3	1	2015-08-19	1	0	2015-08-19	2015-08-13	7	2015-08-20	2015-08-22	4	0	65		1	2015-08-19	NCR	Navotas	1	5000-10000 PHP	Tertiary	0	0	1	lung disease	0	0		1	0	0							0	0	0	0	1	1	1	0	0
65	0	2014-07-29	1	1	0	2015-08-20	1	0	2015-08-20	2015-08-20	1	2015-08-20	2015-08-28	9	0	64.8		0		NCR	Caloocan	1	<5000 PHP	Tertiary	0	0	0		0	0		1	0	0							0	0	0	0	0	0	1	1	0
66	0	2010-02-24	5	2	1	2015-08-20	1	0	2015-08-20	2015-08-17	4	2015-08-24	2015-08-25	6	0	65.3		1	2015-08-20	NCR	Malabon	1	<5000 PHP	Primary	0	0	1	lung disease	0	0		1	0	0							0	0	1	0	0	0	0	0	0
67	0	2003-12-23	11	2	0	2015-08-20	1	0	2015-08-20	2015-08-17	4	2015-08-21	2015-08-23	4	0	0		0		NCR	Manila	0	<5000 PHP	Secondly	0	0	0		0	0		1	0	0							0	0	1	0	1	1	1	0	0
68	0	2002-10-13	12	2	0	2015-08-24	1	0	2015-08-24	2015-08-21	4	2015-08-24	2015-08-31	8	0	66.6		0		NCR	Manila	0	5000-10000 PHP	Primary	0	0	0		0	0		1	1	1	2015-08-22	2	18:00:00	Penicillines	Amoxicillin	Pharmacy	9	0	1	0	1	1	1	0	0
69	0	2013-05-31	2	1	1	2015-08-24	1	0	2015-08-24	2015-08-23	2	2015-08-30	2015-09-03	11	0	0		0		NCR	Caloocan	1	<5000 PHP	none	0	0	0		0	0		1	1	1				Penicillines	Amoxicillin	Pharmacy	9	0	1	0	0	0	0	0	0
70	0	1996-12-31	18	3	1	2015-08-24	1	1	2015-08-25	2015-08-23	2	2015-08-28	2015-09-01	9	0	68.2		0		NCR	Quezon	1	5000-10000 PHP	Vocational	0	0	0		0	0		1	0	0							0	1	0	0	0	0	0	0	1
71	0	1963-10-27	51	3	1	2015-08-26	1	0	2015-08-26	2015-08-23	4	2015-08-27	2015-08-28	3	0	65.9		0		NCR	Manila	0	5000-10000 PHP	Secondly	0	0	0		2	1	15	1	0	0							0	0	1	0	0	0	0	0	0
72	0	2000-01-04	15	2	1	2015-08-26	1	0	2015-08-26	2015-08-07	20	2015-08-28	2015-09-01	7	64.8	65.1		0		NCR	Manila	0	<5000 PHP	Secondly	0	0	0		0	0		1	0	0							0	0	1	0	1	0	0	0	0
73	0	2012-12-07	2	1	1	2015-08-27	1	0	2015-08-27	2015-08-24	4	2015-08-29	2015-09-02	7	67.1	0		0		NCR	Malabon	1	<5000 PHP	Tertiary	0	0	1	lung disease	0	0		1	1	3	2015-08-26	1	22:00:00	Cephalosporines	Cefaclor	Pharmacy	1	0	1	0	0	0	1	1	0
74	0	2001-08-30	13	2	1	2015-08-27	1	0	2015-08-27	2015-08-23	5	2015-08-28	2015-09-03	8	65.4	65.8		0		NCR	Paranaque	1	<5000 PHP	Primary	0	0	0		0	0		1	0	0							0	1	1	0	0	0	1	0	0
75	0	1964-06-30	51	3	1	2015-08-27	1	0	2015-08-27	2015-08-24	4	2015-08-28	2015-08-29	3	65.7	66.2		0		Region 4		2	<5000 PHP	Secondly	0	0	0		0	0		1	0	0							0	1	1	0	0	0	0	1	0
76	0	1985-10-18	29	3	1	2015-08-27	1	0	2015-08-27	2015-08-24	4	2015-08-29	2015-09-04	9	68.6	65.3		0		NCR	Caloocan	1	<5000 PHP	Secondly	0	0	0		2	0		1	1	3	2015-08-27	0	03:00:00	Penicillines	Amoxicillin	Pharmacy	9	0	1	0	1	0	1	1	0
77	0	1993-10-16	21	3	0	2015-08-28	1	0	2015-08-28	2015-08-15	14	2015-08-29	2015-09-15	19	67.4	67		0		NCR	Quezon	1	<5000 PHP	Secondly	0	1	0		0	0		1	0	0							0	0	1	0	0	0	1	0	0
78	0	1999-10-06	15	2	0	2015-08-28	1	0	2015-08-28	2015-08-28	1	2015-08-29	2015-09-04	8	63.3	63.5		1	2015-08-28	NCR	Navotas	1	10000-15000 PHP	Secondly	0	0	0		0	0		1	0	0							0	0	1	1	1	1	1	1	0
79	0	2013-08-11	2	1	0	2015-09-01	1	0	2015-09-01	2015-08-29	4	2015-09-02	2015-09-10	10	65.2	0		0		NCR	Manila	0	<5000 PHP	none	0	0	0		0	0		1	0	0							0	1	0	0	1	1	0	0	0
80	0	1986-07-13	29	3	1	2015-09-01	1	0	2015-09-01	2015-08-26	7	2015-09-03	2015-09-07	7	66.1	66.3		1	2015-09-01	NCR	Valenzuela	1	<5000 PHP	Secondly	0	0	0		2	1	1	1	0	0							0	0	1	1	0	0	1	0	0
81	0	2003-04-01	12	2	0	2015-09-02	1	0	2015-09-02	2015-08-31	3	2015-09-08	2015-09-10	9	67.6	0		0		NCR	Manila	0	<5000 PHP	Secondly	0	0	0		0	0		1	0	0							0	0	0	0	0	0	1	1	0
82	0	1953-07-09	62	3	0	2015-09-03	1	0	2015-09-03	2015-08-31	4	2015-09-04	2015-09-05	3	64.9	65.1		1	2015-09-03	Region 4		2	<5000 PHP	Primary	1	0	1	diabetes	0	0		1	1	1	2015-09-03	0	13:00:00	Metronidazole	Metronidazole	Pharmacy	9	0	0	0	0	0	0	0	0
83	0	1982-05-18	33	3	1	2015-09-03	1	0	2015-09-03	2015-08-31	4	2015-09-04	2015-09-07	5	65.5	65.2		0		Region 3		2	5000-10000 PHP	Secondly	0	0	1	others	2	0		1	1	2	2015-09-03	0	05:30:00	Fluoroqunolones	Ciprofloxacin	Private Clinic	1	1	1	0	0	0	1	0	0
84	0	1996-02-18	19	3	1	2015-09-03	1	0	2015-09-03	2015-08-21	14	2015-09-04	2015-09-08	6	65.7	66.2		1	2015-09-03	NCR	Quezon	1	5000-10000 PHP	Secondly	0	0	0		2	1	4	0	0	0							0	1	1	0	0	0	1	1	0
85	0	1991-05-25	24	3	0	2015-09-04	1	0	2015-09-04	2015-09-02	3	2015-09-05	2015-09-09	6	65.9	66.8		1	2015-09-04	NCR	Quezon	1	5000-10000 PHP	Tertiary	0	0	1	others	2	0		1	0	0							0	0	1	0	0	0	1	1	0
86	0	1983-05-16	32	3	0	2015-09-07	1	0	2015-09-07	2015-08-25	14	2015-09-08	2015-09-23	17	65.4	66.6		1	2015-09-07	Region 4		2	<5000 PHP	Tertiary	1	0	1	others	0	0		1	1	1	2015-09-06	1	19:00:00	Unknown	Unknown	Other Hospital	1	1	1	1	0	0	0	1	0
87	0	2007-10-26	7	2	1	2015-09-08	1	0	2015-09-08	2015-09-06	3	2015-09-09	2015-09-14	7	66.4	67.1		0		NCR	Manila	0	5000-10000 PHP	Primary	0	0	0		0	0		1	1	1	2015-09-08	0	07:00:00	B-lactamase Inhibitors	Co-Amoxiclav	Pharmacy	9	0	1	0	0	0	0	0	0
88	0	1999-12-15	15	2	0	2015-09-10	1	0	2015-09-10	2015-09-04	7	2015-09-10	2015-09-15	6	66.5	66.7		0		NCR	Manila	0	<5000 PHP	Secondly	0	0	1	others	0	0		1	0	0							0	0	1	0	0	0	1	0	0
89	0	2011-10-31	3	1	1	2015-09-11	1	0	2015-09-11	2015-09-09	3	2015-09-12	2015-09-18	8	69.3	0		0		NCR	Malabon	1	<5000 PHP	Secondly	0	0	0		0	0		1	0	0							0	0	0	0	0	0	1	1	1
90	0	2006-10-21	8	2	1	2015-09-11	1	0	2015-09-11	2015-09-08	4	2015-09-11	2015-09-18	8	65	64.7		1	2015-09-11	NCR	Quezon	1	<5000 PHP	Primary	0	0	1	lung disease	0	0		1	0	0							0	0	0	0	0	0	1	1	0
91	0	1962-05-01	53	3	1	2015-09-11	1	0	2015-09-11	2015-09-06	6	2015-09-12	2015-09-18	8	65.3	65.6		0		NCR	Navotas	1	<5000 PHP	Primary	0	0	1	others	0	0		1	0	0							0	0	1	0	0	0	0	0	0
92	0	2002-07-20	13	2	0	2015-09-14	1	0	2015-09-14	2015-09-12	3	2015-09-15	2015-09-18	5	65.8	66.1		1	2015-09-14	NCR	Caloocan	1	<5000 PHP	Secondly	1	0	0		0	0		1	0	0							0	0	1	1	0	1	1	0	0
93	0	1994-04-15	21	3	0	2015-09-15	1	0	2015-09-15	2015-09-13	3	2015-09-16	2015-09-19	5	63.9	66.4		1	2015-09-15	NCR	Manila	0	<5000 PHP	Secondly	0	0	0		0	1	1	1	0	0							0	0	1	0	0	1	0	0	0
94	0	2008-09-15	7	2	0	2015-09-15	1	0	2015-09-15	2015-09-09	7	2015-09-17	2015-09-23	9	66.1	66.3		1	2015-09-15	NCR	Caloocan	1	<5000 PHP	Primary	0	0	0		0	0		1	1	4	2015-09-15	0	07:00:00	Co-trimo	Co-trimoxazole	Pharmacy	9	0	1	0	0	0	0	0	0
95	0	2008-02-04	7	2	0	2015-09-15	1	0	2015-09-15	2015-09-15	1	2015-09-16	2015-09-20	6	65.7	65.9		0		NCR	Caloocan	1	<5000 PHP	Primary	0	0	0		0	0		1	0	0							0	0	1	0	0	0	0	0	0
96	0	2012-04-16	3	1	0	2015-09-18	1	0	2015-09-18	2015-09-16	3	2015-09-19	2015-09-22	5	65.8	0		0		NCR	Manila	0	<5000 PHP	Primary	0	0	1	others	0	0		1	0	0							0	0	1	0	1	1	1	0	0
97	0	2010-06-12	5	2	0	2015-09-18	1	0	2015-09-18	2015-09-12	7	2015-09-19	2015-09-22	5	66	0		0		NCR	Quezon	1	<5000 PHP	Secondly	0	0	1	others	0	0		1	0	0							0	0	0	1	0	0	1	0	0
98	0	1960-05-25	55	3	1	2015-09-21	1	0	2015-09-21	2015-09-18	4	2015-09-24	2015-09-26	6	65.6	66.1		0		NCR	Caloocan	1	<5000 PHP	Primary	1	0	1	diabetes	0	0		1	0	0							0	0	1	0	0	0	1	1	0
99	0	2012-08-01	3	1	0	2015-09-22	1	0	2015-09-22	2015-09-22	1	2015-09-23	2015-09-26	5	60	0		0		NCR	Manila	0	<5000 PHP	none	0	0	0		0	0		0	0	0							0	0	1	0	0	0	1	1	0
100	0	1974-10-02	40	3	1	2015-09-22	1	0	2015-09-22	2015-09-16	7	2015-09-23	2015-09-25	4	65.8	0		1	2015-09-22	Region 3		2	5000-10000 PHP	Vocational	0	0	0		2	0		1	1	2	2015-09-22	0	08:30:00	Penicillines	Amoxicillin	Pharmacy	9	0	1	1	0	0	0	1	0
101	0	1963-03-15	52	3	1	2015-09-23	1	0	2015-09-23	2015-09-19	5	2015-09-24	2015-09-27	5	65.6	65.9		0		NCR	Manila	0	5000-10000 PHP	Vocational	0	0	0		0	1	1	1	1	1	2015-09-19	4	14:00:00	Penicillines	Amoxicillin	Pharmacy	0	0	0	0	0	0	0	1	0
102	0	1995-02-23	20	3	1	2015-09-23	1	0	2015-09-23	2015-09-19	5	2015-09-24	2015-09-27	5	66.2	66.7		0		NCR	Quezon	1	15000-20000 PHP	Secondly	0	0	0		2	1	1	1	0	0							0	0	1	0	0	0	1	1	0
103	0	1998-10-29	16	2	0	2015-09-23	1	0	2015-09-23	2015-09-17	7	2015-10-05	2015-10-09	17	65.9	65.7		0		NCR	Manila	0	5000-10000 PHP	Secondly	0	0	1	others	0	0		1	0	0							0	0	1	0	0	0	1	0	0
104	0	1979-02-02	36	3	1	2015-09-23	1	0	2015-09-23	2015-09-20	4	2015-09-25	2015-09-26	4	65.7	65.7		0		NCR	Manila	0	<5000 PHP	Secondly	0	0	0		1	1	2	1	1	1	2015-09-23	0	06:00:00	Penicillines	Amoxicillin	Pharmacy	9	1	1	0	0	0	1	0	0
105	0	1998-10-02	16	2	0	2015-09-24	1	0	2015-09-24	2015-09-21	4	2015-09-25	2015-09-28	5	67.1	67.3		0		NCR	Malabon	1	5000-10000 PHP	Tertiary	0	0	1	others	0	0		1	1	1	2015-09-24	0	10:00:00	B-lactamase Inhibitors	Co-Amoxiclav	Pharmacy	9	0	1	1	0	0	1	1	0
106	0	1991-10-21	23	3	1	2015-09-24	1	0	2015-09-24	2015-09-23	2	2015-09-25	2015-10-01	8	65.5	65.8		0		NCR	Manila	0	5000-10000 PHP	Tertiary	0	0	0		1	0		1	0	0							0	0	1	1	0	0	0	0	0
107	0	1974-10-05	40	3	1	2015-09-24	1	0	2015-09-24	2015-09-23	2	2015-09-25	2015-10-05	12	65.9	66.1		1	2015-09-24	NCR	Quezon	1	5000-10000 PHP	Secondly	0	0	0		2	0		1	0	0							0	0	1	0	0	0	0	0	0
108	0	2008-07-20	7	2	0	2015-09-23	1	0	2015-09-23	2015-09-23	1	2015-09-24	2015-09-30	8	0	65.9		0		NCR	Mandaluyong	1	<5000 PHP	Primary	0	0	0		0	0		1	1	1	2015-09-23	0	02:00:00	Cephalosporines	Ceftriaxone	Other Hospital	1	1	1	0	1	1	1	0	0
109	0	1980-09-05	35	3	1	2015-09-26	1	2	2015-09-28	2015-09-22	5	2015-09-27	2015-10-02	7	0	65.8		1	2015-09-28	NCR	Caloocan	1	<5000 PHP	Secondly	0	0	0		1	1	3	1	0	0							0	1	1	0	0	0	0	0	0
110	0	2006-04-19	9	2	1	2015-09-29	1	0	2015-09-29	2015-09-27	3	2015-09-30	2015-10-17	19	0	0		1	2015-09-29	NCR	Manila	0	<5000 PHP	Primary	0	0	0		0	0		1	0	0							0	0	1	0	0	0	0	0	0
111	0	2011-12-13	3	1	1	2015-09-28	1	1	2015-09-29	2015-09-23	6	2015-09-30	2015-10-14	17	65.5	65.4		1	2015-09-29	NCR	Caloocan	1	<5000 PHP	Tertiary	0	0	0		0	0		1	0	0							0	0	1	0	1	1	1	1	0
112	0	1963-07-21	52	3	1	2015-09-29	1	0	2015-09-29	2015-09-28	2	2015-09-30	2015-10-03	5	67	67.2		0		NCR	Paranaque	1	5000-10000 PHP	Tertiary	0	0	0		1	1	1	1	1	1	2015-09-28	1	23:00:00	Penicillines	Amoxicillin	Pharmacy	0	1	1	0	0	0	1	0	0
114	0	2004-11-15	10	2	0	2015-09-30	1	0	2015-09-30	2015-09-25	6	2015-10-01	2015-10-09	10	65.8	66.1		1	2015-09-30	NCR	Manila	0	5000-10000 PHP	Primary	0	0	0		0	0		1	0	0							0	0	1	0	0	0	0	0	0
115	0	2012-03-17	3	1	0	2015-09-30	1	0	2015-09-30	2015-09-27	4	2015-10-01	2015-10-04	5	64.9	0		0		NCR	Manila	0	<5000 PHP	Primary	0	0	0		0	0		1	1	3	2015-09-29	1	11:00:00	Penicillines	Amoxicillin	Pharmacy	0	0	1	0	0	0	1	1	0
116	0	2003-02-16	12	2	0	2015-10-01	1	0	2015-10-01	2015-09-28	4	2015-10-02	2015-10-06	6	65.5	65.9		0		NCR	Manila	0	<5000 PHP	Secondly	0	0	0		0	0		1	1	2	2015-09-30	1	08:30:00	Cephalosporines	Cefuroxime	Pharmacy	0	0	1	0	0	1	0	0	0
117	0	2012-11-27	2	1	0	2015-10-01	1	0	2015-10-01	2015-09-28	4	2015-10-02	2015-10-05	5	0	0		0		NCR	Caloocan	1	5000-10000 PHP	Tertiary	0	0	0		0	0		1	0	0							0	0	1	0	0	0	1	1	0
118	0	1988-12-22	26	3	1	2015-10-05	1	0	2015-10-05	2015-10-02	4	2015-10-07	2015-10-10	6	66	65.8		1	2015-10-05	NCR	Manila	0	<5000 PHP	Secondly	0	0	0		0	1	4	1	0	0							0	0	1	0	0	0	1	1	0
119	0	1994-12-15	20	3	1	2015-10-05	1	0	2015-10-05	2015-09-27	9	2015-10-06	2015-10-09	5	0	62.1		1	2015-10-05	NCR	Malabon	1	<5000 PHP	Secondly	0	0	0		2	1	2	1	0	0							0	1	1	0	0	0	1	0	0
120	0	1984-04-19	31	3	1	2015-10-05	1	0	2015-10-05	2015-10-01	5	2015-10-07	2015-10-10	6	0	64.4		0		NCR	Manila	0	<5000 PHP	Secondly	0	0	0		0	0		1	0	0							0	0	1	0	0	0	1	0	0
121	0	2010-09-12	5	2	1	2015-10-06	1	0	2015-10-06	2015-10-04	3	2015-10-07	2015-10-10	5	0	0		0		Region 3		2	5000-10000 PHP	Secondly	0	0	0		0	0		1	0	0							0	0	1	0	0	0	1	0	0
122	0	1993-06-08	22	3	1	2015-10-07	1	0	2015-10-07	2015-10-04	4	2015-10-08	2015-10-11	5	66.1	65.6		0		NCR	Manila	0	<5000 PHP	Secondly	0	0	0		2	1	2	1	0	0							0	0	1	0	0	0	1	1	0
123	0	1986-10-25	28	3	1	2015-10-07	1	0	2015-10-07	2015-09-28	10	2015-10-08	2015-10-14	8	66.8	67.5		1	2015-10-08	NCR	Pasig	1	5000-10000 PHP	Secondly	0	0	0		0	0		0	0	0							0	0	1	0	0	0	1	0	0
124	0	2004-10-10	10	2	0	2015-10-07	1	0	2015-10-07	2015-09-30	8	2015-10-07	2015-10-07	1	0	0		0		Region 4		2	<5000 PHP	Primary	0	0	0		0	0	0	0	0	0							0	1	1	0	0	0	1	1	0
125	0	2003-08-13	12	2	1	2015-10-08	1	0	2015-10-08	2015-10-06	3	2015-10-09	2015-10-14	7	64.1	0		0		NCR	Manila	0	<5000 PHP	Primary	0	0	0		0	0		1	0	0							0	0	0	0	0	0	0	0	0
126	0	1998-03-27	17	2	1	2015-10-07	1	2	2015-10-09	2015-10-01	7	2015-10-08	2015-10-11	5	64.3	0		0		NCR	Manila	0	5000-10000 PHP	Vocational	0	0	0		2	0		1	1	2	2015-10-06	1	20:00:00	Cephalosporines	Cephalexin	Pharmacy	9	1	1	0	0	0	1	0	0
127	0	1998-07-11	17	2	0	2015-10-09	1	0	2015-10-09	2015-10-07	3	2015-10-10	2015-10-16	8	0	0		0		NCR	Caloocan	1	5000-10000 PHP	Secondly	0	0	1	others	0	0		1	0	0							0	0	1	0	0	0	1	1	0
128	0	1995-06-26	20	3	1	2015-10-11	1	1	2015-10-12	2015-10-09	3	2015-10-12	2015-10-15	5	0	0		1	2015-10-12	NCR	Caloocan	1	<5000 PHP	Primary	0	0	0		2	0		1	0	0							0	0	1	0	0	0	1	0	0
129	0	1991-07-16	24	3	1	2015-10-10	1	2	2015-10-12	2015-10-05	6	2015-10-12	2015-10-14	5	64.8	0		0		NCR	Manila	0	<5000 PHP	Secondly	0	0	0		2	1	1	1	0	0							0	0	1	0	0	0	0	0	0
130	0	2001-10-08	14	2	1	2015-10-12	1	1	2015-10-13	2015-09-29	14	2015-10-13	2015-10-20	9	62.1	0		0		NCR	Manila	0	<5000 PHP	Secondly	0	0	0		0	0		1	0	0							0	0	1	0	0	0	1	0	0
131	0	1998-02-16	17	2	1	2015-10-13	1	0	2015-10-13	2015-10-12	2	2015-10-18	2015-10-21	9				0		NCR	Manila	0	<5000 PHP	Tertiary	0	0	0		2	0		1	0	0							0	0	1	0	0	0	0	0	0
132	0	1998-03-20	17	2	1	2015-10-14	1	0	2015-10-14	2015-10-11	4	2015-10-15	2015-10-20	7	66	65.8		0		NCR	Manila	0	5000-10000 PHP	Tertiary	0	0	0		0	0		1	1	3	2015-10-14	0	10:00:00	B-lactamase Inhibitors	Co-Amoxiclav	Pharmacy	9	0	1	0	0	0	1	0	0
133	0	2010-12-20	4	1	0	2015-10-15	1	0	2015-10-15	2015-10-12	4	2015-10-16	2015-10-25	11	9	62.2		0		NCR	Manila	0	5000-10000 PHP	Secondly	0	0	0		0	0		1	0	0							0	0	1	0	0	0	1	0	0
134	0	1972-02-26	43	3	0	2015-10-16	1	0	2015-10-16	2015-10-03	14	2015-10-17	2015-10-21	6	62.8	63.2		0		NCR	Caloocan	1	<5000 PHP	Secondly	0	0	0		0	0		1	0	0							0	0	1	0	0	0	1	0	0
135	0	1994-07-17	21	3	0	2015-10-19	1	0	2015-10-19	2015-10-15	5	2015-10-20	2015-10-23	5	65.9	66.3		1	2015-10-19	NCR	Manila	0	<5000 PHP	Tertiary	0	0	0		0	0		1	1	4	2015-10-18	1	12:00:00	B-lactamase Inhibitors	Co-Amoxiclav	Pharmacy	9	0	1	0	0	0	0	0	0
136	0	1957-03-06	58	3	0	2015-10-20	1	0	2015-10-20	2015-10-17	4	2015-10-21	2015-10-24	5	65.7	65.4		1	2015-10-20	NCR	Manila	0	<5000 PHP	Secondly	0	0	0		0	0		1	1	2	2015-10-20	0	07:00:00	B-lactamase Inhibitors	Co-Amoxiclav	Pharmacy	9	0	1	1	0	0	0	0	0
137	0	1983-02-28	32	3	0	2015-10-20	1	0	2015-10-20	2015-10-17	4	2015-10-21	2015-10-24	5	63	62.3		1	2015-10-20	NCR	Manila	0	<5000 PHP	Vocational	0	0	0		2	0		1	0	0							0	0	1	1	1	1	0	0	0
138	0	1996-08-27	19	3	1	2015-10-21	1	0	2015-10-21	2015-10-18	4	2015-10-23	2015-10-27	7	65.7	66.1		1	2015-10-21	NCR	Quezon	1	10000-15000 PHP	Secondly	0	0	0		2	1		1	0	0							0	1	1	0	0	1	1	0	0
139	0	2012-03-21	3	1	1	2015-10-23	1	0	2015-10-23	2015-10-11	13	2015-10-24	2015-10-28	6	63	63.7		0		NCR	Manila	0	<5000 PHP	none	0	0	0		0	0		1	0	0							0	0	0	0	0	0	1	0	0
140	0	1966-11-08	48	3	0	2015-10-23	1	0	2015-10-23	2015-10-20	4	2015-10-25	2015-10-30	8				0		NCR	Malabon	1	<5000 PHP	Primary	0	0	0		0	0		1	1	2	2015-10-21	2	08:00:00	Penicillines	Cloxacillin	Pharmacy	0	0	0	0	0	0	0	0	0
141	0	1991-10-30	23	3	0	2015-10-28	1	0	2015-10-28	2015-10-22	7	2015-10-29	2015-11-01	5	65.1	66.6		0		Region 8		2	<5000 PHP	Secondly	0	0	0		2	0		1	1	1	2015-10-27	1	19:00:00	Unknown	Unknown	Private Clinic	1	0	1	0	1	1	0	0	0
142	0	2000-04-20	15	2	1	2015-10-29	1	0	2015-10-29	2015-10-27	3	2015-10-31	2015-11-02	5	66	66.3		1	2015-10-29	NCR	Malabon	1	<5000 PHP	Secondly	0	0	0		0	0		1	0	0							0	1	1	0	0	0	0	0	0
143	0	2008-11-19	6	2	1	2015-10-29	1	0	2015-10-29	2015-10-21	9	2015-10-30	2015-11-09	12	65.2	65.7		1	2015-10-29	NCR	Manila	0	<5000 PHP	Secondly	0	0	0		0	0		0	0	0							0	0	0	0	0	0	0	0	0
144	0	1976-09-16	39	3	0	2015-10-29	1	0	2015-10-29	2015-10-28	2	2015-10-31	2015-11-02	5	64.2	64.6		1	2015-10-29	NCR	Caloocan	1	<5000 PHP	Secondly	0	0	0		0	0		1	0	0							0	1	1	0	0	0	0	0	0
145	0	1990-11-09	24	3	1	2015-11-02	1	0	2015-11-02	2015-10-29	5	2015-11-03	2015-11-09	8	63.2	63.5		0		NCR	Caloocan	1	10000-15000 PHP	Secondly	0	0	0		0	0		1	0	0							0	0	1	0	0	0	0	0	0
146	0	1997-01-01	18	3	1	2015-11-02	1	0	2015-11-02	2015-10-29	5	2015-11-03	2015-11-06	5	64	63.7		0		Region 4		2	10000-15000 PHP	Tertiary	0	0	1	others	2	1	2	1	1	2	2015-11-01	1	19:00:00	Penicillines	Amoxicillin	Pharmacy	9	0	1	0	0	0	1	0	0
147	0	1990-05-24	25	3	1	2015-11-02	1	0	2015-11-02	2015-10-20	14	2015-11-08	2015-11-12	11	65.3	65.9		1	2015-11-02	NCR	Las Pinas	1	5000-10000 PHP	Vocational	0	0	0		2	0		1	1	10	2015-10-30	3	18:00:00	Cephalosporines	Cefixime	Pharmacy	1	1	1	0	0	0	1	0	0
148	0	1992-02-11	23	3	1	2015-11-02	1	2	2015-11-04	2015-10-31	3	2015-11-03	2015-11-07	6	65.6	66.6		1	2015-11-04	NCR	Malabon	1	5000-10000 PHP	Secondly	0	0	0		2	0		1	1	1	2015-11-02	0	05:00:00	Cephalosporines	Cefuroxime	Pharmacy	9	0	1	0	0	0	1	0	0
149	0	1995-12-05	19	3	0	2015-11-04	1	0	2015-11-04	2015-10-31	5	2015-11-05	2015-11-08	5	65.8	66.2		0		NCR	Manila	0	<5000 PHP	Secondly	0	0	0		0	0		1	1	3	2015-11-04	0	11:30:00	Penicillines	Amoxicillin	Public health center	1	0	1	0	0	0	1	0	0
150	0	1998-12-10	16	2	1	2015-11-04	1	0	2015-11-04	2015-11-01	4	2015-11-06	2015-11-10	7	64.5	65.8		0		NCR	Manila	0	<5000 PHP	Primary	0	0	0		0	1	5	1	1	2	2015-11-03	1	22:00:00	Cephalosporines	Cefixime	Pharmacy	9	1	1	0	0	0	0	0	0
151	0	2007-11-12	7	2	1	2015-11-05	1	0	2015-11-05	2015-10-30	7	2015-11-06	2015-11-09	5	64.2	64.5		0		Region 4		2	5000-10000 PHP	Primary	0	0	0		0	0		1	1	2	2015-11-02	3		Cephalosporines	Cephalexin	Pharmacy	9	1	1	0	0	0	0	0	0
152	0	1967-06-16	48	3	0	2015-11-06	1	0	2015-11-06	2015-11-04	3	2015-11-07	2015-11-09	4	63.9	64.2		1	2015-11-06	NCR	Valenzuela	1	<5000 PHP	Primary	1	0	1	others	2	0		1	1	2	2015-11-06	0	06:00:00	Co-trimo	Co-trimoxazole	Pharmacy	9	0	1	0	0	0	0	0	0
153	0	2003-10-28	12	2	0	2015-11-09	1	0	2015-11-09	2015-11-08	2	2015-11-10	2015-11-16	8	64.2	64.4		1	2015-11-09	NCR	Manila	0	<5000 PHP	Primary	0	0	1	others	0	0		1	1	1	2015-11-08	1	21:00:00	Co-trimo	Co-trimoxazole	Pharmacy	9	1	1	0	0	0	1	0	0
154	0	1954-10-30	61	3	0	2015-11-10	1	0	2015-11-10	2015-11-04	7	2015-11-11	2015-11-15	6	63.4	63.8		0		NCR	Quezon	1	<5000 PHP	Primary	0	0	0		0	0		1	1	6	2015-11-10	0	08:00:00	Fluoroqunolones	Ciprofloxacin	Pharmacy	9	0	1	0	0	0	0	0	0
155	0	2008-05-30	7	2	1	2015-11-11	1	0	2015-11-11	2015-11-07	5	2015-11-12	2015-11-14	4	63.4	64		1	2015-11-11	NCR	Manila	0	<5000 PHP	Vocational	0	0	0		0	0		1	1	1	2015-11-11	0	01:00:00	Penicillines	Amoxicillin	Pharmacy	0	0	1	0	0	0	1	0	0
156	0	1994-10-26	21	3	1	2015-11-12	1	0	2015-11-12	2015-11-04	9	2015-11-13	2015-11-13	2	64	64.5		0		NCR	Quezon	1	<5000 PHP	Tertiary	0	0	0		2	0		1	0	0							0	0	1	0	0	1	0	0	0
157	0	2013-08-14	2	1	0	2015-11-12	1	0	2015-11-12	2015-11-11	2	2015-11-14	2015-11-16	5	0			0		NCR	Paranaque	1	<5000 PHP	Secondly	0	0	0		0	0		1	1	1	2015-11-11	1	21:00:00	Penicillines	Amoxicillin	Others	0	1	1	0	0	0	1	1	0
158	0	1989-08-24	26	3	1	2015-11-24	1	0	2015-11-24	2015-11-22	3	2015-11-25	2015-11-29	6	0	64.6		0		NCR	Manila	0	<5000 PHP	Tertiary	0	0	0		0	1	3	1	1	2	2015-11-24	0	06:00:00	Penicillines	Amoxicillin	Pharmacy	0	0	0	0	0	0	0	0	0
159	0	1989-04-12	26	3	1	2015-11-24	1	0	2015-11-24	2015-11-19	6	2015-11-25	2015-12-01	8	0	64.8		0		NCR	Caloocan	1	<5000 PHP	Secondly	0	0	0		2	1	3	1	0	0							0	0	1	0	0	0	1	0	0
160	0	2010-11-17	5	2	0	2015-11-27	1	0	2015-11-27	2015-11-16	12	2015-11-28	2015-12-01	5	0	63.3		0		NCR	Paranaque	1	<5000 PHP	Secondly	0	0	0		0	0		1	0	0							0	1	1	0	0	0	0	0	0
161	0	1990-11-14	25	3	1	2015-12-01	1	0	2015-12-01	2015-11-25	7	2015-12-03	2015-12-17	17	0	60.2		0		NCR	Pasay	1	<5000 PHP	Secondly	0	0	0		2	0		1	0	0							0	1	0	0	0	0	1	0	0
162	0	2009-06-14	6	2	0	2015-12-03	1	0	2015-12-03	2015-11-27	7	2015-12-14	2015-12-17	15	63.2			0		NCR	Manila	0	<5000 PHP	Tertiary	0	0	1	others	0	0		1	0	0							0	0	1	0	0	0	0	0	0
163	0	1971-10-20	44	3	0	2015-12-08	1	0	2015-12-08	2015-12-02	7	2015-12-09	2015-12-09	2	0	63.3		1	2015-12-08	Region 4		2	15000-20000 PHP	Secondly	1	0	1	others	0	0		1	1	1	2015-12-08	0	07:00:00	Cephalosporines	Cefuroxime	Pharmacy	1	0	1	1	1	1	0	0	0
164	0	1986-09-18	29	3	1	2015-12-10	1	0	2015-12-10	2015-12-04	7	2015-12-16	2015-12-18	9	0	66.9		1	2015-12-10	NCR	Malabon	1	<5000 PHP	Secondly	0	0	0		1	1	5	1	1	1	2015-12-09	1	21:00:00	Cephalosporines	Cephalexin	Pharmacy	0	1	1	1	1	1	1	0	0
165	0	1995-10-11	20	3	1	2015-12-10	1	0	2015-12-10	2015-11-27	14	2015-12-11	2015-12-14	5	0	60		0		NCR	Manila	0	<5000 PHP	Secondly	0	0	0		0	0		1	0	0							0	0	1	1	1	1	1	0	0
166	0	1990-12-15	24	3	0	2015-12-13	1	1	2015-12-14	2015-12-08	6	2015-12-14	2015-12-16	4	0	0		0		NCR	Manila	0	<5000 PHP	Tertiary	0	0	0		0	0		1	1	1	2015-12-12	1	19:00:00	Penicillines	Amoxicillin	Public health center	1	1	0	0	0	0	0	0	0
167	0	2012-05-17	3	1	0	2016-01-04	1	0	2016-01-04	2015-12-27	9	2016-01-05	2016-01-09	6	0	0		0		NCR	Manila	0	<5000 PHP	Secondly	0	0	0		0	0		1	0	0							0	0	1	0	0	0	1	0	0
168	0	1997-07-26	18	3	1	2016-01-04	1	0	2016-01-04	2015-12-24	12	2016-01-05	2016-01-13	10	0	62.3		1	2016-01-04	NCR	Malabon	1	<5000 PHP	Secondly	0	0	0		2	0		1	1	4	2016-01-04	0	08:00:00	B-lactamase Inhibitors	Co-Amoxiclav	Private Clinic	1	0	1	0	1	1	1	0	0
169	0	1955-01-03	61	3	0	2016-01-05	1	1	2016-01-06	2015-12-27	10	2016-01-07	2016-01-07	3	66	65.6		0		NCR	Las Pinas	1	5000-10000 PHP	Primary	0	0	0		0	0		1	1	2	2016-01-05	0	07:00:00	Tetracyclines	Doxycycline	Other Hospital	1	1	0	0	0	0	1	0	0
170	0	1965-09-15	50	3	1	2016-01-05	1	1	2016-01-06	2015-12-31	6	2016-01-07	2016-01-12	8	65.4	66.7		0		NCR	Caloocan	1	5000-10000 PHP	Secondly	1	0	1	others	0	0		1	1	3	2016-01-05	0	07:00:00	Penicillines	Amoxicillin	Pharmacy	0	0	1	0	0	0	1	1	0
171	0	1962-06-13	53	3	1	2016-01-10	1	1	2016-01-11	2016-01-01	10	2016-01-11	2016-01-15	6	0	0		0		Region 3		2	<5000 PHP	Primary	0	0	1	diabetes	1	1	20	1	0	0							0	0	1	1	0	0	1	1	0
172	0	1986-11-30	29	3	1	2016-01-10	1	1	2016-01-11	2016-01-04	7	2016-01-11	2016-01-15	6	0	0		0		NCR	Manila	0	5000-10000 PHP	Secondly	0	0	0		2	1	10	1	0	0							0	1	1	0	0	0	0	1	0
173	0	1997-03-17	18	3	1	2016-01-07	1	0	2016-01-07	2016-01-05	3	2016-01-08	2016-01-13	7	0	0		0		NCR	Manila	0	<5000 PHP	Secondly	0	0	0		2	1	4	1	0	0							0	0	1	0	0	1	1	0	0
175	0	2014-03-16	1	1	1	2016-01-09	1	0	2016-01-09	2016-01-08	2	2016-01-11	2016-01-16	8	0	0		0		NCR	Manila	0	<5000 PHP	Secondly	0	0	1	others	0	0		1	0	0							0	0	0	0	0	1	1	0	0
176	0	1994-02-24	21	3	0	2016-01-04	1	0	2016-01-04	2015-12-29	7	2016-01-05	2016-01-28	25	67	68		0		Region 4		2	<5000 PHP	Secondly	1	0	0		0	0		1	0	0							0	1	0	1	0	1	0	0	0
177	0	1970-04-19	45	3	1	2016-01-14	1	0	2016-01-14	2015-12-25	21	2016-01-15	2016-01-20	7	0	66.3		0		NCR	Valenzuela	1	<5000 PHP	Tertiary	1	0	1	others	1	1		1	1	5	2016-01-13	1	20:00:00	Fluoroqunolones	Ciprofloxacin	Pharmacy	1	1	0	1	0	0	1	1	0
178	0	1949-06-04	66	3	1	2016-01-20	1	0	2016-01-20	2016-01-15	6	2016-01-21	2016-02-02	14	0	66.6		0		NCR	Manila	0	<5000 PHP	Secondly	0	0	0		1	0		1	1	5	2016-01-20	0	07:00:00	B-lactamase Inhibitors	Co-Amoxiclav	Pharmacy	0	0	0	1	0	0	0	0	0
179	0	1966-06-28	49	3	1	2016-01-19	1	1	2016-01-20	2016-01-16	4	2016-01-21	2016-01-21	3	0	0		0		Region 4		2	<5000 PHP	Secondly	0	0	0		2	1	25	1	0	0							0	0	1	0	0	0	0	1	0
180	0	1982-06-17	33	3	1	2016-01-21	1	0	2016-01-21	2016-01-18	4	2016-01-22	2016-01-28	8	61.5	65.5		0		NCR	Paranaque	1	<5000 PHP	Primary	0	0	0		1	1		1	0	0							0	1	1	1	0	0	1	1	0
181	0	2006-11-04	9	2	0	2016-01-25	1	0	2016-01-25	2016-01-21	5	2016-01-26	2016-01-29	5	62.9	63.9		0		NCR	Caloocan	1	5000-10000 PHP	Secondly	0	0	0		0	0		1	0	0							0	0	1	0	0	0	1	1	0
183	0	1979-02-21	36	3	1	2016-01-27	1	0	2016-01-27	2016-01-21	7	2016-01-28	2016-01-31	5	61.2	63.7		0		NCR	Navotas	1	<5000 PHP	Tertiary	0	0	1	others	2	1	1	1	0	0							0	0	1	1	0	0	1	1	0
184	0	1968-02-01	47	3	1	2016-01-27	1	1	2016-01-28	2016-01-14	14	2016-01-29	2016-02-11	16	66.7	62.7		0		NCR	Valenzuela	1	5000-10000 PHP	Secondly	0	0	0		2	1	7	1	0	0							0	1	1	1	0	0	0	0	0
185	0	2001-03-08	14	2	1	2016-01-28	1	0	2016-01-28	2016-01-22	7	2016-01-30	2016-02-24	28	0	61.1		0		Region 4		2	5000-10000 PHP	Tertiary	0	0	0		2	1	7	1	1	7	2016-01-22	6		Cephalosporines	Cephalexin	Public health center	1	1	1	1	0	0	1	1	0
186	0	2003-04-02	12	2	1	2016-01-29	1	0	2016-01-29	2016-01-28	2	2016-01-31	2016-02-06	9	0	0		0		Region 4		2	<5000 PHP	Secondly	0	0	0		0	0		1	0	0							0	1	1	1	1	1	1	1	0
187	0	1991-08-25	24	3	1	2016-01-30	1	2	2016-02-01	2016-01-11	20	2016-01-31	2016-02-15	17	0	0		0		Region 3		2	5000-10000 PHP	Tertiary	0	0	0		2	0		1	1	7				B-lactamase Inhibitors	Co-Amoxiclav	Pharmacy	1	1	1	0	0	0	1	1	1
188	0	2009-11-23	6	2	0	2016-02-03	1	0	2016-02-03	2016-02-02	2	2016-02-04	2016-02-09	7	0	0		0		NCR	Manila	0	<5000 PHP	Secondly	0	0	0		0	0		1	0	0							0	0	1	0	0	0	0	0	0
189	0	1962-12-20	53	3	0	2016-02-02	1	1	2016-02-03	2016-01-30	4	2016-02-04	2016-02-07	6	0	0		0		NCR	Las Pinas	1	<5000 PHP	Primary	0	0	0		0	0		1	1	2	2016-01-31	2		Penicillines	Amoxicillin	Others	0	0	1	1	0	0	1	1	0
190	0	1994-12-02	21	3	1	2016-02-02	1	1	2016-02-03	2016-01-31	3	2016-02-03	2016-02-08	7	0	0		0		NCR	Manila	0	<5000 PHP	Secondly	1	0	0		2	1	6	1	0	0							0	0	1	0	0	0	1	0	0
191	0	1994-04-26	21	3	0	2016-02-04	1	0	2016-02-04	2016-02-02	3	2016-02-06	2016-02-09	6	0	0		0		NCR	Manila	0	<5000 PHP	Secondly	0	0	0		2	1		1	1	1				Cephalosporines	Cefuroxime	Pharmacy	0	0	1	0	0	0	1	1	0
192	0	1992-07-28	23	3	1	2016-02-04	1	0	2016-02-04	2016-02-03	2	2016-02-04	2016-02-04	1	0	64.5		0		Region 4		2	5000-10000 PHP	Secondly	0	0	0		1	1		0	0	0							0	1	0	0	1	1	0	1	1
193	0	2014-01-01	2	1	0	2016-02-09	1	0	2016-02-09	2016-02-05	5	2016-02-10	2016-02-15	7	0	0		0		NCR	Manila	0	5000-10000 PHP	Tertiary	0	0	0		0	0		1	0	0							0	0	0	0	0	0	1	1	0
194	0	1959-10-23	56	3	1	2016-02-09	1	0	2016-02-09	2016-02-05	5	2016-02-10	2016-02-23	15	0	0		0		NCR	Manila	0	5000-10000 PHP	Secondly	0	0	0		2	1	5	1	1	1	2016-02-08	1	19:00:00	Cephalosporines	Cefuroxime	Pharmacy	0	1	1	0	0	0	1	1	0
195	0	2012-07-12	3	1	1	2016-02-10	1	0	2016-02-10	2016-02-07	4	2016-02-12	2016-02-15	6	64.2	64.8		0		NCR	Quezon	1	10000-15000 PHP	Tertiary	0	0	0		0	0		1	1	2	2016-02-10	0	16:40:00	Macrolides	Clarithromycin	Pharmacy	9	1	0	0	1	1	1	0	0
196	0	2010-10-01	5	2	0	2016-02-10	1	0	2016-02-10	2016-02-08	3	2016-02-11	2016-03-08	28	62.4	63.8		0		Region 4		2	5000-10000 PHP	Primary	0	0	0		0	0		1	1	2	2016-02-10	0	06:00:00	Penicillines	Amoxicillin	Other Hospital	1	1	0	0	0	0	0	1	0
197	0	1981-07-24	34	3	1	2016-02-10	1	1	2016-02-11	2016-02-09	2	2016-02-11	2016-02-12	3	0	0		0		NCR	Manila	0	<5000 PHP	Vocational	0	0	0		2	0		0	0	0							0	1	0	0	1	0	0	0	0
198	0	2012-05-17	3	1	1	2016-02-07	1	0	2016-02-07	2016-02-01	7	2016-02-09	2016-02-18	12	0	0		0		NCR	Manila	0	5000-10000 PHP	Vocational	0	0	0		0	0		0	0	0							0	0	0	0	1	1	0	0	0
199	0	2011-01-11	5	2	0	2016-02-15	1	0	2016-02-15	2016-02-08	8	2016-02-16	2016-02-19	5	0	0		0		NCR	Pasay	1	<5000 PHP	Secondly	1	0	0		0	0		1	1	7	2016-02-14	1		B-lactamase Inhibitors	Co-Amoxiclav	Pharmacy	0	1	1	1	0	0	1	1	0
200	0	1936-05-25	79	3	1	2016-02-15	1	1	2016-02-16	2016-02-09	7	2016-02-17	2016-02-17	3	0	0		0		NCR	Caloocan	1	<5000 PHP	Secondly	0	0	1	others	2	1	1	1	1	7				Penicillines	Unknown		9	1	1	1	1	1	1	1	0
201	0	1951-07-13	64	3	1	2016-02-15	1	1	2016-02-16	2016-02-13	3	2016-02-16	2016-02-23	9	0	0		0		NCR	Manila	0	5000-10000 PHP	Secondly	0	0	0		0	0		1	0	0							0	1	1	0	0	0	1	1	0
202	0	1953-04-04	62	3	1	2016-02-17	1	0	2016-02-17	2016-02-15	3	2016-02-17	2016-02-23	7	0	63.8		0		NCR	Manila	0	<5000 PHP	Tertiary	0	0	0		0	0		1	0	0							0	0	1	1	0	0	1	1	0
203	0	2007-01-10	9	2	1	2016-02-16	1	2	2016-02-18	2016-02-10	7	2016-02-19	2016-03-01	15	0	9		0		NCR	Taguig	1	<5000 PHP	Secondly	1	0	0		0	0		1	1	7	2016-02-16	0		Penicillines	Amoxicillin	Public health center	1	1	0	0	0	0	1	1	0
204	0	1975-09-17	40	3	1	2016-02-20	1	2	2016-02-22	2016-02-16	5	2016-02-21	2016-02-25	6	0	9		0		NCR	Quezon	1	5000-10000 PHP	Secondly	0	0	0		2	1	37	1	0	0							0	0	1	1	0	0	1	0	0
205	0	1953-06-21	62	3	0	2016-02-22	1	1	2016-02-23	2016-02-09	14	2016-02-23	2016-02-25	4	0	9		0		NCR	Marikina	1	<5000 PHP	Primary	0	0	0		0	1	10	1	0	0							0	0	1	0	1	1	0	0	0
206	0	2013-09-03	2	1	1	2016-02-25	1	1	2016-02-26	2016-02-22	4	2016-02-26	2016-03-02	7	0	0		0		NCR	Quezon	1	15000-20000 PHP	Tertiary	1	0	0		0	0		1	1	1	2016-02-24	1	17:00:00	B-lactamase Inhibitors	Co-Amoxiclav	Pharmacy	1	0	0	0	0	0	1	1	0
207	0	2006-05-25	9	2	1	2016-02-25	1	1	2016-02-26	2016-02-11	15	2016-02-26	2016-03-01	6	0	0		0		Region 3		2	<5000 PHP	Primary	1	0	0		0	0		1	0	0							0	0	1	0	0	0	0	0	0
208	0	1994-03-30	21	3	1	2016-03-01	1	0	2016-03-01	2016-02-14	17	2016-03-02	2016-03-04	4	0	67.3		1	2016-03-01	NCR	Paranaque	1	5000-10000 PHP	Secondly	0	0	0		0	0		1	1	14	2016-02-20	10	08:00:00	Cephalosporines	Cefuroxime	Private Clinic	1	1	1	0	0	0	1	1	0
210	0	1961-04-21	54	3	0	2016-03-03	1	0	2016-03-03	2016-03-03	1	2016-03-04	2016-03-06	4	0	0		0		NCR	Navotas	1	<5000 PHP	Vocational	0	0	0		0	0		0	0	0							0	0	1	0	0	0	0	0	0
211	0	2003-07-10	12	2	1	2016-03-03	1	0	2016-03-03	2016-03-01	3	2016-03-05	2016-03-08	6	0	0		0		NCR	Navotas	1	<5000 PHP	Secondly	0	0	0		0	0		1	0	0							0	0	1	0	0	0	1	0	1
212	0	1996-01-06	20	3	1	2016-03-04	1	0	2016-03-04	2016-02-27	7	2016-03-05	2016-03-09	6	0	0		0		Region 4		2	<5000 PHP	Tertiary	0	0	0		2	0		1	1	7	2016-03-04	0		Cephalosporines	Cephalexin	Public health center	1	1	1	0	0	0	1	0	0
213	0	1959-04-11	56	3	0	2016-03-04	1	2	2016-03-06	2016-03-02	3	2016-03-05	2016-03-10	7	0	0		0		NCR	Quezon	1	<5000 PHP	Secondly	0	0	0		0	0		1	1								0	0	0	0	0	0	0	0	0
214	0	1971-02-28	45	3	1	2016-03-07	1	0	2016-03-07	2016-03-01	7	2016-04-24	2016-05-22	77	0	0		0		NCR	Manila	0	15000-20000 PHP	Vocational	0	0	0		2	1	3	1	1	3	2016-03-07	0	08:00:00	Cephalosporines	Cefixime	Pharmacy	1	0	1	1	0	0	1	1	0
215	0	1945-05-12	70	3	0	2016-03-08	1	1	2016-03-09	2016-03-06	3	2016-03-09	2016-03-24	17	0	0		0		Region 3		2	<5000 PHP	Secondly	1	0	1	others	0	0		0	0	0							0	0	1	0	0	0	0	0	1
216	0	2006-10-09	9	2	1	2016-03-09	1	1	2016-03-10	2016-03-06	4	2016-03-12	2016-03-25	17	0	0		0		Region 4		2	<5000 PHP	Secondly	0	0	1	others	0	0		1	0	0							0	1	0	0	0	0	1	1	0
217	0	2011-03-11	4	1	1	2016-03-06	1	0	2016-03-06	2016-03-01	6	2016-03-07	2016-03-31	26	0	0		0		NCR	Caloocan	1	<5000 PHP	Secondly	0	0	0		0	0		1	1	4	2016-03-06	0	07:00:00	Cephalosporines	Cefixime	Pharmacy	1	1	0	0	0	0	1	1	0
218	0	1994-11-12	21	3	0	2016-03-16	1	1	2016-03-17	2016-03-11	6	2016-03-20	2016-04-01	17	0	0		0		NCR	Paranague	1	10000-15000 PHP	Vocational	0	0	1	others	0	0		1	1					Unknown	Unknown	Pharmacy	9	1	1	0	0	0	1	0	0
219	0	2011-12-28	4	1	1	2016-03-31	1	0	2016-03-31	2016-03-27	5	2016-04-01	2016-04-01	2	0	0		0		NCR	Malabon	1	<5000 PHP	Secondly	1	0	0		0	0		1	1	2	2016-03-31	0		Unknown	Unknown	Public health center	1	1	0	0	0	0	1	1	0
220	0	1991-04-20	24	3	0	2016-03-31	1	1	2016-04-01	2016-03-25	7	2016-04-04	2016-04-05	6	0	0		0		NCR	Manila	0	5000-10000 PHP	Secondly	0	0	0		2	1	15	1	1	5	2016-03-31	0	19:00:00	Penicillines	Amoxicillin	Pharmacy	0	0	1	0	0	0	0	1	0
221	0	1995-04-05	20	3	1	2016-04-04	1	0	2016-04-04	2016-04-01	4	2016-04-05	2016-04-08	5	0	0		0		NCR	Pasay	1	5000-10000 PHP	Secondly	0	0	0		2	1		1	0	0							0	1	1	1	1	1	0	1	0
222	0	1999-04-02	17	2	1	2016-04-05	1	0	2016-04-05	2016-04-03	3	2016-04-09	2016-04-11	7	0	0		0		NCR	Manila	0	<5000 PHP	Secondly	0	0	0		2	1	18	1	0	0							0	0	1	0	0	0	0	1	0
223	0	1962-03-18	54	3	0	2016-04-06	1	0	2016-04-06	2016-03-31	7	2016-04-07	2016-04-08	3	0	0		1	2016-04-06	NCR	Caloocan	1	<5000 PHP	Secondly	1	0	1	diabetes	0	1	60	1	1	1	2016-04-06	0	09:00:00	Fluoroqunolones	Ciprofloxacin	Private Clinic	1	1	1	1	0	0	0	1	1
224	0	2013-01-29	3	1	1	2016-04-07	1	1	2016-04-08	2016-04-05	3	2016-04-10	2016-04-13	7	0	0		0		Region 4		2	<5000 PHP	Secondly	1	0	0		0	0		1	0	0							0	1	0	1	1	1	0	0	0
225	0	2014-07-01	1	1	1	2016-04-07	1	1	2016-04-08	2016-04-06	2	2016-04-11	2016-04-15	9	0	0		0		Region 3		2	<5000 PHP	Secondly	1	0	0		0	0		1	1	1	2016-04-06	1	18:00:00	Chloramphenicol	Chloramphenicol	Pharmacy	1	1	0	1	0	0	0	1	0
226	0	1982-11-15	33	3	0	2016-04-09	1	2	2016-04-11	2016-04-07	3	2016-04-12	2016-04-12	4	0	0		0		Region 4		2	5000-10000 PHP	SPED	1	0	0		0	0		1	0	0							0	1	1	0	0	0	1	1	0
227	0	2006-03-08	10	2	0	2016-04-11	1	1	2016-04-12	2016-04-10	2	2016-04-13	2016-04-21	11	0	0		0		NCR	Malabon	1	<5000 PHP	Primary	0	0	0		0	0		1	0	0							0	1	1	1	0	0	0	1	0
228	0	1992-07-14	23	3	1	2016-04-13	1	0	2016-04-13	2016-04-07	7	2016-04-13	2016-04-25	13	0	0		1	2016-04-13	NCR	Pasay	1	5000-10000 PHP	Tertiary	0	0	0		1	1	4	1	0	0							0	0	1	0	0	1	1	1	0
229	0	1994-04-26	21	3	1	2016-04-13	1	0	2016-04-13	2016-04-06	8	2016-04-14	2016-04-18	6	0	0		1	2016-04-13	NCR	Taguig	1	<5000 PHP	Tertiary	0	0	0		0	0		1	0	0							0	1	0	0	0	0	0	0	0
230	0	1986-12-02	29	3	1	2016-04-14	1	0	2016-04-14	2016-04-13	2	2016-04-19	2016-06-03	51	0	0		0		NCR	Malabon	1	5000-10000 PHP	Secondly	0	0	0		2	1	2	1	1	2	2016-04-14	0		Penicillines	Amoxicillin	Pharmacy	0	1	1	0	0	0	1	0	0
231	0	2013-02-08	3	1	1	2016-04-15	1	0	2016-04-15	2016-04-13	3	2016-04-16	2016-04-22	8	0	0		0		NCR	Manila	0	<5000 PHP	Secondly	1	0	1	lung disease	0	0		1	0	0							0	0	0	0	0	0	1	1	0
232	0	1992-10-21	23	3	1	2016-04-20	1	0	2016-04-20	2016-04-02	19	2016-04-22	2016-04-23	4	0	0		1	2016-04-20	NCR	Paranaque	1	<5000 PHP	Primary	1	0	0		1	1	12	1	1	2	2016-04-20	0		Cephalosporines	cefexime	Pharmacy	1	0	0	0	0	0	0	0	0
233	0	1979-06-04	36	3	1	2016-04-20	1	0	2016-04-20	2016-04-15	6	2016-04-21	2016-04-29	10	0	0		0		Region 4		2	<5000 PHP	Primary	0	0	0		2	1	25	1	0	0							0	0	0	0	0	0	0	0	0
234	0	1999-07-07	16	2	1	2016-04-21	1	0	2016-04-21	2016-04-19	3	2016-04-22	2016-05-04	14	0	0		1	2016-04-21	NCR	Caloocan	1	15000-20000 PHP	Secondly	0	0	0		1	0		1	0	0							0	1	0	0	0	0	0	1	0
235	0	1966-02-10	50	3	0	2016-04-21	1	0	2016-04-21	2016-04-17	5	2016-04-22	2016-04-24	4	0	0		0		NCR	Quezon	1	10000-15000 PHP	Tertiary	1	0	1	diabetes	0	0		1	1	5	2016-04-21	0	09:00:00	Penicillines	Amoxicillin	Pharmacy	0	0	1	0	0	0	0	0	0
236	0	1990-06-21	25	3	1	2016-04-21	1	0	2016-04-21	2016-04-18	4	2016-04-23	2016-04-27	7	0	0		0		NCR	Valenzuela	1	10000-15000 PHP	Secondly	0	0	0		1	0		1	1	1	2016-04-20	1		Penicillines	Amoxicillin	Pharmacy	1	0	1	1	1	1	0	1	0
237	0	2013-11-18	2	1	0	2016-04-22	1	0	2016-04-22	2016-04-18	5	2016-04-27	2016-05-01	10	0	0		0		NCR	Manila	0	5000-10000 PHP	Vocational	1	0	0		0	0		1	1	1	2016-04-21	1	12:00:00	Penicillines	Amoxicillin	Public health center	1	1	0	0	0	0	1	0	0
238	0	1993-03-07	23	3	1	2016-04-25	1	0	2016-04-25	2016-04-09	17	2016-05-03	2016-05-05	11	0	0		1	2016-04-25	NCR	Quezon	1	5000-10000 PHP	Secondly	0	0	0		2	1		1	0	0							0	0	1	1	1	0	1	1	0
239	0	1954-12-02	61	3	0	2016-04-26	1	0	2016-04-26	2016-04-25	2	2016-04-27	2016-05-02	7	0	0		1	2016-04-26	NCR	Caloocan	1	<5000 PHP	Tertiary	1	0	0		0	0		0	0	0							0	0	0	1	0	0	0	1	0
240	0	1975-04-05	41	3	0	2016-04-26	1	1	2016-04-27	2016-04-21	6	2016-04-28	2016-05-02	7	0	0		0		Region 3		2	10000-15000 PHP	Tertiary	1	0	0		0	0		1	1	5	2016-04-26	0		Penicillines	Cloxacillin	Pharmacy	1	1	0	1	0	0	0	0	0
241	0	2007-07-25	8	2	0	2016-04-29	1	0	2016-04-29	2016-04-16	14	2016-05-10	2016-05-15	17	0	0		0		NCR	Manila	0	5000-10000 PHP	Tertiary	1	0	0		0	0		1	1	5	2016-04-27	2		Cephalosporines	Cefuroxime	Other Hospital	1	0	1	1	0	0	0	1	0
242	0	2003-08-25	12	2	1	2016-05-02	1	1	2016-05-03	2016-04-30	3	2016-05-03	2016-05-04	3	0	0		0		NCR	Quezon	1	<5000 PHP	Primary	0	0	0		0	0		1	1	1	2016-05-01	1		Penicillines	Amoxicillin	Pharmacy	0	0	0	0	0	0	0	0	0
243	0	2013-11-20	2	1	1	2016-05-03	1	1	2016-05-04	2016-04-20	14	2016-05-04	2016-05-09	7	0	0		0		NCR	Caloocan	1	5000-10000 PHP	Secondly	1	0	1	others	0	0		1	0	0							0	0	0	0	1	0	1	1	0
244	0	2006-11-08	9	2	1	2016-05-03	1	1	2016-05-04	2016-04-27	7	2016-05-05	2016-05-08	6	0	0		0		NCR	Manila	0	5000-10000 PHP	Secondly	1	0	0		0	0		1	0	0							0	0	1	0	0	0	1	0	0
245	0	2004-09-23	11	2	0	2016-05-06	1	0	2016-05-06	2016-05-03	4	2016-05-08	2016-05-11	6	0	0		0		NCR	Manila	0	<5000 PHP	Secondly	0	0	0		0	0		1	0	0							0	0	1	0	0	0	1	0	0
246	0	1971-03-31	45	3	0	2016-05-06	1	0	2016-05-06	2016-04-16	21	2016-05-10	2016-05-11	6	0	0		0		NCR	Manila	0	<5000 PHP	Secondly	0	0	0		2	1	5	1	1	1	2016-05-06	0	04:00:00	Lincomycines	Clindamycin	SLH	1	0	1	1	0	0	0	1	0
247	0	2012-03-27	4	1	1	2016-05-10	1	0	2016-05-10	2016-05-07	4	2016-05-13	2016-05-15	6	0	0		0		NCR	Malabon	1	5000-10000 PHP	Primary	1	0	0		0	0		1	1	2	2016-05-10	0	01:00:00	Fluoroqunolones	Floaxacillin	Pharmacy	1	1	1	1	0	0	0	0	1
249	0	1994-12-03	21	3	0	2016-05-16	1	0	2016-05-16	2016-05-10	7	2016-05-19	2016-05-23	8	0	0		0		NCR	Manila	0	10000-15000 PHP	Tertiary	0	0	0		0	0		1	0	0							0	0	1	1	0	0	1	1	0
250	0	1993-08-21	22	3	0	2016-05-18	1	0	2016-05-18	2016-05-16	3	2016-05-18	2016-05-24	7	0	0		0		NCR	Manila	0	15000-20000 PHP	Tertiary	0	0	0		0	0		1	1	2	2016-05-17	1	05:00:00	B-lactamase Inhibitors	Co-Amoxiclav	Pharmacy	1	0	1	1	1	1	0	1	0
251	0	1983-02-14	33	3	0	2016-05-18	1	0	2016-05-18	2016-05-16	3	2016-05-20	2016-05-23	6	0	0		0		NCR	Malabon	1	10000-15000 PHP	Primary	0	0	0		2	0		1	0	0							0	0	1	1	0	0	1	1	0
252	0	1979-12-09	36	3	0	2016-05-20	1	0	2016-05-20	2016-05-07	14	2016-05-21	2016-06-14	26	0	0		0		Region 4		2	<5000 PHP	Secondly	0	0	0		2	0		1	1	2	2016-05-20	0		Fluoroqunolones	Ciprofloxacin	Pharmacy	1	1	1	1	0	0	0	1	0
253	0	2004-06-12	11	2	1	2016-05-23	1	0	2016-05-23	2016-05-16	8	2016-05-24	2016-06-01	10	0	0		0		NCR	Quezon	1	10000-15000 PHP	Tertiary	1	0	1	others	0	0		1	0	0							0	0	1	1	0	0	1	1	0
254	0	2010-11-09	5	2	1	2016-05-24	1	0	2016-05-24	2016-05-22	3	2016-05-26	2016-05-31	8	0	0		0		NCR	Quezon	1	5000-10000 PHP	Secondly	1	0	0		0	0		1	1	2				Unknown	Unknown		0	0	0	0	1	0	0	0	0
255	0	1976-08-07	39	3	0	2016-05-31	1	0	2016-05-31	2016-05-25	7	2016-06-01	2016-06-06	7	0	0		1	2016-05-31	NCR	Manila	0	<5000 PHP	Primary	0	0	0		0	0		1	0	0							0	0	1	1	0	0	0	0	0
256	0	2014-09-02	1	1	0	2016-05-28	1	0	2016-05-28	2016-05-27	2	2016-05-31	2016-06-03	7	0	0		0		NCR	Malabon	1	<5000 PHP	Primary	1	0	0		0	0		1	0	0							0	0	0	0	1	1	0	0	0
257	0	2014-10-18	1	1	1	2016-06-01	1	0	2016-06-01	2016-05-28	5	2016-06-02	2016-06-06	6	0	0		0		NCR	Manila	0	5000-10000 PHP	Vocational	1	0	0		0	0		1	1	1	2016-05-31	1		Penicillines	Amoxicillin	Pharmacy	1	1	0	0	0	0	1	1	0
258	0	1980-04-17	36	3	0	2016-06-01	1	0	2016-06-01	2016-05-29	4	2016-06-02	2016-06-06	6	0	0		0		NCR	Manila	0	<5000 PHP	Primary	0	0	0		2	1	60	1	0	0							0	0	1	0	0	0	1	1	0
259	0	1945-01-27	71	3	1	2016-06-02	1	0	2016-06-02	2016-05-27	7	2016-06-03	2016-06-09	8	0	0		0		NCR	Manila	0	<5000 PHP	Primary	1	0	0		1	1	5	1	0	0							0	0	0	1	1	0	0	1	0
260	0	2014-07-07	1	1	1	2016-06-06	1	0	2016-06-06	2016-06-04	3	2016-06-07	2016-06-12	7	0	0		0		NCR	Caloocan	1	<5000 PHP	Secondly	1	0	0		0	0		1	0	0							0	1	0	0	0	0	1	0	0
261	0	2010-07-21	5	2	0	2016-06-08	1	0	2016-06-08	2016-06-02	7	2016-06-09	2016-06-11	4	0	0		0		NCR	Quezon	1	5000-10000 PHP	Tertiary	1	0	0		0	0		1	1	3	2016-06-07	1		Cephalosporines	Cephalexin	Pharmacy	1	1	1	1	0	0	1	1	0
262	0	1997-11-16	18	3	1	2016-06-09	1	0	2016-06-09	2016-06-07	3	2016-06-12	2016-06-16	8	0	0		0		NCR	Manila	0	15000-20000 PHP	Tertiary	1	0	0		0	0		1	0	0							0	0	0	1	1	1	0	0	0
263	0	1957-04-06	59	3	1	2016-06-15	1	0	2016-06-15	2016-06-11	5	2016-06-17	2016-06-24	10	0	0		0		NCR	Caloocan	1	<5000 PHP	Secondly	0	0	0		1	0		1	1	4	2016-06-14	1		Penicillines	Amoxicillin	Pharmacy	0	1	0	0	0	1	0	0	0
264	0	1992-11-06	23	3	0	2016-06-14	1	1	2016-06-15	2016-06-08	7	2016-06-15	2016-06-21	8	0	0		0		Region 4		2	<5000 PHP	Tertiary	0	1	0		0	0		1	0	0							0	1	1	0	0	0	1	0	0
265	0	2009-05-23	7	2	1	2016-06-15	1	0	2016-06-15	2016-06-09	7	2016-06-16	2016-06-24	10	0	0		0		NCR	Manila	0	<5000 PHP	Primary	0	0	0		0	0		1	1	7				Penicillines	Amoxicillin	Public health center	1	1	0	0	0	1	0	0	0
266	0	1969-07-29	46	3	0	2016-06-20	1	0	2016-06-20	2016-06-15	6	2016-06-21	2016-06-27	8	0	0		0		NCR	Paranaque	1	<5000 PHP	Secondly	1	0	1	others	0	0		1	0	0							0	1	0	0	0	0	0	1	0
267	0	1998-03-09	18	3	1	2016-06-21	1	0	2016-06-21	2016-06-16	6	2016-06-23	2016-06-29	9	0	0		0		NCR	Caloocan	1	<5000 PHP	Secondly	0	0	0		2	1	10	1	0	0							0	0	1	1	0	0	1	1	0
268	0	2009-06-03	7	2	1	2016-06-22	1	0	2016-06-22	2016-06-16	7	2016-06-23	2016-06-23	2	0	0		0		NCR	Manila	0	<5000 PHP	Secondly	0	0	0		0	0		1	1	1	2016-06-18	4		Cephalosporines	Cefuroxime	Pharmacy	1	1	0	1	0	1	0	1	0
269	0	1986-10-08	29	3	1	2016-06-25	1	2	2016-06-27	2016-06-22	4	2016-06-27	2016-06-30	6	0	0		0		NCR	Valenzuela	1	<5000 PHP	Primary	0	0	0		1	1	10	1	0	0							0	0	0	0	0	0	1	1	0
270	0	2008-10-11	7	2	1	2016-06-27	1	0	2016-06-27	2016-06-23	5	2016-06-28	2016-07-04	8	0	0		0		NCR	Caloocan	1	<5000 PHP	Secondly	0	0	1	others	0	0		1	0	0							0	0	0	0	0	0	1	1	0
271	0	1955-05-12	61	3	0	2016-06-27	1	1	2016-06-28	2016-06-23	5	2016-06-28	2016-07-09	13	0	0		0		NCR	Manila	0	<5000 PHP	Secondly	1	0	0		2	0		1	1	2	2016-06-26	1		Co-trimo	Co-trimoxazole	Others	0	0	1	0	1	0	0	0	0
272	0	1964-01-15	52	3	0	2016-06-30	1	0	2016-06-30	2016-06-24	7	2016-07-01	2016-07-04	5	0	0		0		NCR	Quezon	1	<5000 PHP	Primary	1	0	0		0	0		1	0	0							0	0	1	1	0	0	1	1	0
273	0	1978-02-23	38	3	0	2016-06-30	1	1	2016-07-01	2016-06-26	5	2016-07-01	2016-07-11	12	0	0		0		Region 3		2	<5000 PHP	Secondly	0	0	0		0	0		1	1	3	2016-06-29	1	08:00:00	B-lactamase Inhibitors	Co-Amoxiclav	Pharmacy	1	0	0	0	0	0	0	0	0
274	0	2006-07-13	9	2	1	2016-07-03	2	2	2016-07-05	2016-06-20	14	2016-07-18	2016-07-19	17	0	0		0		NCR	Navotas	1	<5000 PHP	none	0	0	0		0	0		1	1	3	2016-07-03	0	17:00:00	Penicillines	Amoxicillin	Public health center	1	0	0	0	0	0	0	0	0
275	0	1987-05-14	29	3	1	2016-07-05	2	0	2016-07-05	2016-07-01	5	2016-07-06	2016-07-11	7	0	0		0		NCR	Caloocan	1	<5000 PHP	Secondly	0	0	0		2	1	10	1	0	0							0	1	1	0	0	0	0	0	0
276	0	1974-06-26	42	3	1	2016-07-11	2	0	2016-07-11	2016-07-09	3	2016-07-13	2016-07-16	6	0	0		1	2016-07-11	NCR	Malabon	1	<5000 PHP	Secondly	0	0	1	others	2	0		1	1	2	2016-07-11	0	06:00:00	Fluoroqunolones	Ciprofloxacin	Pharmacy	9	0	0	0	0	0	0	1	0
277	0	2012-09-18	3	1	1	2016-07-12	2	0	2016-07-12	2016-07-06	7	2016-07-13	2016-07-16	5	0	0		0		NCR	Manila	0	5000-10000 PHP	Secondly	0	0	0		0	0		1	1	3	2016-07-12	0	10:30:00	Penicillines	Amoxicillin	Pharmacy	1	0	0	0	0	0	1	0	0
278	0	1991-01-23	25	3	1	2016-07-14	2	0	2016-07-14	2016-06-30	15	2016-07-15	2016-08-04	22	0	0		0		NCR	San Juan	1	<5000 PHP	Secondly	0	0	0		2	1		1	1					Unknown	Unknown		0	0	0	0	0	0	1	1	0
279	0	1992-06-20	24	3	1	2016-07-15	2	0	2016-07-15	2016-07-11	5	2016-07-16	2016-07-20	6	0	0		0		NCR	Makati	1	<5000 PHP	Tertiary	1	0	0		1	1	15	1	1	2	2016-07-15	0	07:00:00	Co-trimo	Co-trimoxazole	Pharmacy	1	0	1	0	0	0	1	1	0
280	0	1976-09-24	39	3	1	2016-07-15	2	0	2016-07-15	2016-07-14	2	2016-07-16	2016-07-19	5	0	0		0		NCR	Manila	0	<5000 PHP	Secondly	0	0	0		1	1	15	1	0	0							0	0	1	0	0	0	0	0	0
281	0	1999-09-01	16	2	0	2016-07-16	2	2	2016-07-18	2016-07-14	3	2016-07-20	2016-07-24	9	0	0		0		NCR	San Juan	1	5000-10000 PHP	Tertiary	0	0	0		0	0		1	0	0							0	0	1	1	0	0	1	1	0
282	0	2009-02-18	7	2	0	2016-07-16	2	2	2016-07-18	2016-07-13	4	2016-07-17	2016-07-20	5	0	0		0		NCR	Manila	0	<5000 PHP	Secondly	0	0	0		0	0		1	0	0							0	0	0	0	0	0	0	0	0
283	0	2006-03-06	10	2	1	2016-07-18	2	0	2016-07-18	2016-07-17	2	2016-07-19	2016-07-30	13	65.4	63.2		0		NCR	Manila	0	<5000 PHP	Secondly	0	0	0		0	0		0	0	0							0	0	1	0	0	0	0	1	0
284	0	1952-03-13	64	3	0	2016-07-20	2	0	2016-07-20	2016-07-19	2	2016-07-21	2016-07-25	6	63.8	0		0		NCR	Quezon	1	<5000 PHP	Secondly	1	0	1	diabetes	0	0		1	1	1	2016-07-20	0	08:00:00	Penicillines	Cloxacillin	Pharmacy	1	0	1	0	0	0	0	1	0
285	0	2001-12-19	14	2	0	2016-07-20	2	0	2016-07-20	2016-07-18	3	2016-07-22	2016-08-05	17	65.4	66.8		0		NCR	Manila	0	<5000 PHP	Secondly	0	0	0		0	0		1	0	0							0	0	1	1	0	0	1	1	0
286	0	1992-09-10	23	3	0	2016-07-21	2	1	2016-07-22	2016-07-19	3	2016-07-24	2016-07-27	7	0	0		0		NCR	Quezon	1	<5000 PHP	Secondly	0	0	0		0	0		1	0	0							0	0	1	1	0	0	1	0	0
287	0	1986-04-18	30	3	0	2016-07-21	2	1	2016-07-22	2016-07-13	9	2016-07-22	2016-07-31	11	0	0		0		NCR	Manila	0	<5000 PHP	Secondly	0	0	0		2	0		1	1	7	2016-07-20	1		B-lactamase Inhibitors	Unknown	Pharmacy	1	0	1	0	0	0	1	1	0
288	0	1980-10-26	35	3	0	2016-07-23	2	2	2016-07-25	2016-07-21	3	2016-07-24	2016-07-28	6	0	0		0		Region 4		2	<5000 PHP	Primary	0	0	0		0	1	15	1	1	1	2016-07-22	1	21:00:00	Fluoroqunolones	Ciprofloxacin	Pharmacy	1	1	1	0	1	1	0	0	0
289	0	1993-11-09	22	3	1	2016-07-25	2	1	2016-07-26	2016-07-11	15	2016-07-26	2016-08-08	15	0	0		0		NCR	Mandaluyong	1	<5000 PHP	Secondly	0	0	0		2	1	5	1	1	3				Co-trimo	Co-trimoxazole	Pharmacy	1	1	1	0	0	0	1	0	0
290	0	1989-06-05	27	3	1	2016-07-26	2	1	2016-07-27	2016-07-24	3	2016-07-28	2016-07-31	6	0	0		0		NCR	Quezon	1	<5000 PHP	Secondly	0	0	0		2	1	9	0	0	0							0	1	1	0	0	0	1	1	0
291	0	1993-12-18	22	3	0	2016-07-25	2	2	2016-07-27	2016-07-19	7	2016-07-26	2016-07-28	4	0	0		1	2016-07-27	Region 4		2	<5000 PHP	Secondly	0	0	0		0	0		1	0	0							0	0	1	0	0	0	0	0	0
292	0	1996-09-11	19	3	0	2016-08-01	2	0	2016-08-01	2016-07-30	3	2016-08-02	2016-08-05	5	60.8	61.1		0		NCR	Manila	0	<5000 PHP	Vocational	0	0	0		0	0		0	0	0							0	0	1	0	0	0	1	1	0
293	0	1976-06-13	40	3	0	2016-08-02	2	0	2016-08-02	2016-08-02	1	2016-08-03	2016-08-06	5	64.8	65.7		1	2016-08-02	NCR	Manila	0	5000-10000 PHP	Secondly	0	0	0		2	1	1	1	1	1	2016-08-02	0	10:00:00	Cephalosporines	Cephalexin	Pharmacy	1	0	0	0	0	0	0	1	0
294	0	1983-03-28	33	3	1	2016-08-02	2	1	2016-08-03	2016-07-25	9	2016-08-03	2016-08-06	5	0	0		0		NCR	Quezon	1	<5000 PHP	Primary	0	0	0		0	1	8	1	1	7	2016-08-01	1	23:00:00	Penicillines	Amoxicillin	Pharmacy	0	0	1	1	0	0	0	0	0
295	0	1997-07-29	19	3	1	2016-08-03	2	0	2016-08-03	2016-07-31	4	2016-08-05	2016-08-10	8	66.7	66.3		0		NCR	Manila	0	<5000 PHP	Vocational	0	0	0		2	0		1	0	0							0	0	1	0	0	0	0	1	0
296	0	1989-02-16	27	3	0	2016-08-06	2	2	2016-08-08	2016-08-04	3	2016-08-07	2016-08-11	6	0	0		0		NCR	Manila	0	<5000 PHP	Vocational	0	0	0		0	0		0	0	0							0	0	1	0	0	0	1	1	0
297	0	1979-11-24	36	3	1	2016-08-08	2	0	2016-08-08	2016-08-04	5	2016-08-09	2016-08-15	8	0	0		0		Region 3		2	15000-20000 PHP	Secondly	0	0	0		2	0		1	1								0	0	0	0	0	0	1	0	0
298	0	1961-06-13	55	3	1	2016-08-09	2	1	2016-08-10	2016-08-03	7	2016-08-10	2016-08-14	6	0	0		0		NCR	Manila	0	<5000 PHP	Secondly	0	0	0		0	1	48	1	0	0							0	0	1	0	0	0	1	1	1
299	0	2014-07-26	2	1	0	2016-08-12	2	0	2016-08-12	2016-08-11	2	2016-08-18	2016-08-25	14	0	0		0		NCR	Quezon	1	10000-15000 PHP	Secondly	0	0	0		0	0		1	0	0							0	1	0	1	1	1	0	0	0
300	0	1990-12-13	25	3	1	2016-08-16	2	0	2016-08-16	2016-08-10	7	2016-08-17	2016-08-18	3	0	66.2		0		NCR	Pasay	1	<5000 PHP	Secondly	0	0	0		2	0		1	0	0							0	1	1	0	0	0	0	0	0
301	0	1977-05-02	39	3	1	2016-08-17	2	0	2016-08-17	2016-08-10	8	2016-08-20	2016-09-03	18	0	66.8		0		NCR	Paranaque	1	<5000 PHP	Primary	1	0	1	others	2	1	3	1	0	0							0	0	1	1	0	0	0	0	0
302	0	1989-04-21	27	3	0	2016-08-19	2	0	2016-08-19	2016-08-17	3	2016-08-20	2016-08-23	5	10	0		0		NCR	Manila	0	<5000 PHP	Secondly	0	0	0		0	0		1	0	0							0	1	1	0	0	0	1	0	0
304	0	2001-06-03	15	2	1	2016-08-20	2	2	2016-08-22	2016-08-16	5	2016-08-22	2016-09-05	17	0	0		0		NCR	Malabon	1	<5000 PHP	Primary	0	0	0		2	0		1	0	0							0	1	1	1	1	0	1	1	0
305	0	1963-07-06	53	3	1	2016-08-23	2	0	2016-08-23	2016-08-20	4	2016-08-24	2016-08-27	5	60.3	60		1	2016-08-23	NCR	Manila	0	<5000 PHP	Primary	0	0	0		2	0		0	0	0							0	0	1	0	0	0	1	0	1
306	0	2011-06-28	5	2	0	2016-08-23	2	0	2016-08-23	2016-08-03	21	2016-08-24	2016-09-01	10	68.2	63.1		0		NCR	Caloocan	1	5000-10000 PHP	Tertiary	1	0	0		0	0		1	1	2	2016-08-22	1	21:00:00	Penicillines	Amoxicillin	Pharmacy	0	0	1	0	0	0	1	0	0
307	0	1950-09-24	65	3	0	2016-08-23	2	1	2016-08-24	2016-08-18	6	2016-08-30	2016-09-06	15	0	0		0		NCR	Manila	0	<5000 PHP	Primary	1	0	1	others	0	0		1	0	0							0	1	1	0	0	0	1	1	0
308	0	1996-04-13	20	3	1	2016-08-24	2	0	2016-08-24	2016-08-20	5	2016-08-25	2016-08-29	6	67.8	65.1		1	2016-08-24	NCR	Manila	0	<5000 PHP	Secondly	0	0	0		2	1	3	1	0	0							0	0	1	0	0	0	1	1	0
309	0	1969-01-12	47	3	1	2016-08-24	2	0	2016-08-24	2016-08-20	5	2016-08-25	2016-08-29	6	63.6	64.7		1	2016-08-24	NCR	Las Pinas	1	<5000 PHP	Tertiary	0	0	0		0	1		0	0	0							0	1	1	1	0	0	1	1	0
310	0	2008-08-16	8	2	0	2016-08-24	2	0	2016-08-24	2016-08-20	5	2016-08-25	2016-08-27	4	62.6	62.4		1	2016-08-24	NCR	Manila	0	<5000 PHP	Primary	0	0	0		0	0		1	0	0							0	0	1	1	0	0	1	1	0
311	0	2011-10-11	4	1	0	2016-08-24	2	0	2016-08-24	2016-08-22	3	2016-08-26	2016-08-28	5	65	65.5		0		NCR	Manila	0	<5000 PHP	Secondly	0	0	0		0	0		1	0	0							0	0	0	0	0	0	1	1	0
313	0	1968-11-18	47	3	1	2016-08-25	2	0	2016-08-25	2016-08-21	5	2016-08-26	2016-08-30	6	0	17.1		1	2016-08-25	NCR	Manila	0	<5000 PHP	Secondly	0	0	0		1	1	10	1	0	0							0	1	0	1	0	0	1	1	0
314	0	1966-09-13	49	3	1	2016-08-25	2	0	2016-08-25	2016-08-15	11	2016-08-26	2016-08-30	6	0	66.7		1	2016-08-25	Region 4		2	<5000 PHP	Primary	0	0	1	liver disease ;others	0	1	3	1	0	0							0	1	1	1	0	0	1	1	1
315	0	1985-02-21	31	3	1	2016-08-24	2	1	2016-08-25	2016-08-18	7	2016-08-25	2016-08-26	3	67.1	66.8		1	2016-08-25	NCR	Malabon	1	5000-10000 PHP	Secondly	0	0	0		2	1	8	1	0	0							0	1	1	0	0	0	0	0	0
316	0	1971-08-15	45	3	1	2016-08-24	2	1	2016-08-25	2016-08-22	3	2016-08-25	2016-08-31	8	66.2	68.6		1	2016-08-25	NCR	Quezon	1	<5000 PHP	Secondly	0	0	0		2	0		1	0	0							0	0	0	0	0	0	1	0	0
317	0	1987-06-23	29	3	1	2016-08-25	2	0	2016-08-25	2016-08-24	2	2016-08-26	2016-08-29	5	1	66		1	2016-08-25	NCR	Malabon	1	<5000 PHP	Secondly	0	0	0		2	0		1	1	1	2016-08-24	1	19:00:00	Penicillines	Amoxicillin	Others	0	1	1	1	0	0	1	1	0
318	0	1957-02-04	59	3	1	2016-08-25	2	0	2016-08-25	2016-08-22	4	2016-08-26	2016-08-26	2	0	67.3		0		NCR	Valenzuela	1	<5000 PHP	Secondly	0	0	0		0	0		1	0	0							0	1	1	0	0	0	1	1	0
319	0	1997-01-08	19	3	1	2016-08-25	2	1	2016-08-26	2016-08-22	4	2016-08-27	2016-08-28	4	0	0		0		NCR	Caloocan	1	5000-10000 PHP	Secondly	0	0	0		2	1	15	1	0	0							0	1	1	0	0	0	0	0	0
320	0	1991-08-14	25	3	1	2016-08-30	2	0	2016-08-30	2016-08-23	8	2016-08-31	2016-09-05	7	63.5	61.8		0		NCR	Quezon	1	<5000 PHP	Secondly	0	0	0		2	1	15	0	0	0							0	0	1	0	0	0	0	1	0
321	0	1991-12-01	24	3	0	2016-08-30	2	0	2016-08-30	2016-08-27	4	2016-09-01	2016-09-03	5	64.6	64.9		0		NCR	Paranaque	1	5000-10000 PHP	Tertiary	1	0	0		0	0		1	0	0							0	0	0	0	0	0	0	1	0
322	0	1964-08-10	52	3	1	2016-08-30	2	0	2016-08-30	2016-08-16	15	2016-08-31	2016-09-02	4	66.9	67.1		0		NCR	Pasay	1	10000-15000 PHP	Tertiary	1	0	1	others	0	0		1	1	1				Macrolides	Erythromycin	Pharmacy	0	0	1	0	0	0	0	1	0
323	0	1977-10-13	38	3	0	2016-08-31	2	0	2016-08-31	2016-08-29	3	2016-09-01	2016-09-04	5	63.5	64.6		1	2016-08-31	Region 4		2	<5000 PHP	Secondly	0	0	0		2	0		1	0	0							0	1	1	0	1	1	0	0	0
324	0	1994-05-18	22	3	1	2016-09-05	2	0	2016-09-05	2016-08-30	7	2016-09-06	2016-09-08	4	0	66		1	2016-09-05	NCR	Taguig	1	<5000 PHP	Tertiary	0	0	0		0	0		1	0	0							0	1	1	0	0	0	1	0	0
325	0	1977-08-03	39	3	1	2016-09-04	2	1	2016-09-05	2016-09-01	4	2016-09-05	2016-09-08	5	0	0		0		NCR		1	<5000 PHP	Tertiary	0	0	1	others	0	1	30	0	0	0							0	1	1	0	0	0	1	1	0
326	0	1986-03-17	30	3	1	2016-09-04	2	1	2016-09-05	2016-08-30	6	2016-09-05	2016-09-05	2	0	0		0		NCR	Paranaque	1	5000-10000 PHP	Tertiary	0	0	0		2	1	3	1	1	1				Cephalosporines	Cefuroxime	Pharmacy	1	1	1	0	0	0	1	0	1
327	0	1990-11-30	25	3	1	2016-09-05	2	1	2016-09-06	2016-09-03	3	2016-09-06	2016-09-07	3	0	0		0		NCR	Paranaque	1	<5000 PHP	Secondly	0	0	0		0	1	15	1	1	2			20:00:00	Penicillines	Amoxicillin	Others	0	1	0	0	0	0	0	0	0
328	0	1942-05-27	74	3	0	2016-09-06	2	0	2016-09-06	2016-09-04	3	2016-09-07	2016-09-07	2	66	63.1		1	2016-09-06	NCR	Caloocan	1	<5000 PHP	Primary	0	0	0		0	0		1	0	0							0	0	1	1	0	0	0	0	0
329	0	1997-08-04	19	3	1	2016-09-06	2	0	2016-09-06	2016-09-02	5	2016-09-07	2016-09-09	4	65.3	61.2		1	2016-09-06	Region 3		2	<5000 PHP	Secondly	0	0	0		0	1	15	1	0	0							0	1	1	1	0	0	1	0	0
330	0	1993-09-18	22	3	1	2016-09-07	2	0	2016-09-07	2016-09-02	6	2016-09-08	2016-09-15	9	0	0		0		NCR	Quezon	1	<5000 PHP	Secondly	0	0	0		2	1	15	1	1	1	2016-09-06	1	03:00:00	Cephalosporines	Ceftriaxone	Other Hospital	1	1	1	0	0	0	1	0	0
331	0	1982-12-07	33	3	1	2016-09-06	2	2	2016-09-08	2016-09-04	3	2016-09-08	2016-09-10	5	0	0		0		NCR	Malabon	1	10000-15000 PHP	Secondly	0	0	0		2	1	15	1	0	0							0	0	1	0	1	1	1	0	0
332	0	2009-01-08	7	2	1	2016-09-08	2	0	2016-09-08	2016-09-01	8	2016-09-09	2016-09-11	4	0	0		0		NCR	Quezon	1	5000-10000 PHP	Primary	0	0	0		0	0		0	0	0							0	0	0	0	1	1	0	0	0
333	0	1986-02-18	30	3	1	2016-09-09	2	0	2016-09-09	2016-09-06	4	2016-09-10	2016-09-12	4	0	65.9		1	2016-09-09	NCR	Paranaque	1	<5000 PHP	Primary	0	0	0		0	0		1	1	2			20:00:00	Penicillines	Amoxicillin	Others	0	1	1	1	0	0	1	0	0
334	0	1968-11-17	47	3	1	2016-09-08	2	1	2016-09-09	2016-09-05	4	2016-09-08	2016-09-10	3	0	0		0		NCR	Caloocan	1	<5000 PHP	Secondly	0	0	1	liver disease	2	1	4	0	0	0							0	1	0	0	0	0	0	0	0
335	0	2013-05-29	3	1	1	2016-09-11	2	2	2016-09-13	2016-09-09	3	2016-09-12	2016-09-15	5	0	0		0		NCR	Manila	0	<5000 PHP	Secondly	0	0	0		0	0		0	0	0							0	1	0	0	0	0	1	0	0
336	0	1993-08-16	23	3	1	2016-09-12	2	1	2016-09-13	2016-09-09	4	2016-09-13	2016-09-14	3	0	0		0		Region 3		2	<5000 PHP	Secondly	0	0	0		2	1	6	1	0	0							0	0	1	0	0	0	1	1	0
337	0	1959-01-01	57	3	0	2016-09-11	2	2	2016-09-13	2016-08-29	14	2016-09-12	2016-09-16	6	0	0		0		NCR	Quezon	1	<5000 PHP	Tertiary	0	0	0		0	0		0	0	0							0	1	1	0	0	0	1	1	0
338	0	1994-07-31	22	3	1	2016-09-14	2	0	2016-09-14	2016-09-08	7	2016-09-15	2016-09-17	4	66.8	66.8		1	2016-09-14	Region 3		2	<5000 PHP	Secondly	0	0	0		0	0		1	0	0							0	0	0	0	1	1	0	0	0
339	0	2014-11-28	1	1	1	2016-09-15	2	0	2016-09-15	2016-09-12	4	2016-09-16	2016-09-20	6	0	0		0		NCR	Manila	0	<5000 PHP	Secondly	0	0	0		0	0		1	1	3	2016-09-14	1	15:00:00	Cephalosporines	Cefaclor	Pharmacy	1	1	1	1	0	0	1	1	0
340	0	1987-04-09	29	3	1	2016-09-14	2	1	2016-09-15	2016-09-07	8	2016-09-15	2016-09-18	5	0	0		0		NCR	Manila	0	5000-10000 PHP	Vocational	0	0	0		0	1	6	1	0	0							0	1	1	1	1	0	1	0	0
341	0	2009-03-30	7	2	1	2016-09-15	2	0	2016-09-15	2016-09-12	4	2016-09-16	2016-09-18	4	62.6	0		0		NCR	Valenzuela	1	5000-10000 PHP	Secondly	0	0	0		0	0		1	0	0							0	0	1	0	0	0	1	0	0
342	0	1990-11-20	25	3	0	2016-09-15	2	1	2016-09-16	2016-09-10	6	2016-09-16	2016-09-19	5	0	0		0		NCR	Manila	0	10000-15000 PHP	Tertiary	0	0	0		2	0		1	1	1	2016-09-12	3	08:00:00	Penicillines	Amoxicillin	Pharmacy	0	0	1	0	0	0	1	1	0
343	0	1993-11-29	22	3	0	2016-09-15	2	1	2016-09-16	2016-09-11	5	2016-09-15	2016-09-16	2	0	0		0		NCR	Quezon	1	<5000 PHP	Secondly	0	0	0		2	0		1	0	0							0	0	1	1	0	0	0	1	0
344	0	1959-12-01	56	3	0	2016-09-18	2	1	2016-09-19	2016-09-11	8	2016-09-19	2016-09-28	11	68.2	66.9		1	2016-09-19	NCR	Manila	0	<5000 PHP	Secondly	0	0	1	diabetes	0	0		1	1	2	2016-09-17	1	19:00:00	Penicillines	Amoxicillin		0	0	1	0	1	1	1	0	0
345	0	1993-04-23	23	3	1	2016-09-18	2	1	2016-09-19	2016-09-14	5	2016-09-19	2016-09-20	3	0	63.7		1	2016-09-19	NCR	Manila	0	5000-10000 PHP	Secondly	0	0	0		1	1	15	0	0	0							0	1	1	0	0	0	0	0	0
346	0	1968-05-21	48	3	1	2016-09-16	2	0	2016-09-16	2016-08-27	21	2016-09-19	2016-09-27	12	0	0		0		Region 3		2	<5000 PHP	Secondly	0	0	1	liver disease ;renal disease	0	0		1	1	20	2016-09-15	1	03:00:00	Unknown	Unknown		1	0	1	1	1	1	1	1	0
347	0	1998-08-08	18	3	1	2016-09-18	2	1	2016-09-19	2016-08-29	21	2016-09-21	2016-10-08	21	0	0		0		NCR	Muntinlupa	1	<5000 PHP	Secondly	0	0	1	others	2	0		1	1	7	2016-09-03	15	19:00:00	Co-trimo	Co-trimoxazole		1	1	1	0	0	0	0	1	0
348	0	2004-04-28	12	2	1	2016-09-19	2	1	2016-09-20	2016-09-12	8	2016-09-20	2016-09-22	4	0	0		0		NCR	Manila	0	15000-20000 PHP	Vocational	0	0	0		0	0		1	0	0							0	1	1	0	0	0	0	0	0
349	0	2004-04-30	12	2	1	2016-09-19	2	1	2016-09-20	2016-09-18	2	2016-09-20	2016-09-26	8	0	0		1	2016-09-20	NCR	Manila	0	<5000 PHP	Secondly	1	0	0		0	0		1	0	0							0	1	0	1	1	0	1	1	0
350	0	2010-06-06	6	2	1	2016-09-21	2	0	2016-09-21	2016-09-19	3	2016-09-22	2016-09-28	8	0	0		0		NCR	Manila	0	5000-10000 PHP	Primary	1	0	0		0	0		1	0	0							0	1	0	0	0	1	0	0	0
351	0	1941-01-10	75	3	1	2016-09-21	2	0	2016-09-21	2016-09-14	8	2016-09-22	2016-09-29	9	64.1	60.9		0		NCR	Caloocan	1	<5000 PHP	Tertiary	1	0	1	others	2	0		1	0	0							0	0	0	0	1	0	0	0	0
352	0	2012-10-02	3	1	1	2016-09-21	2	0	2016-09-21	2016-09-14	8	2016-09-24	2016-10-08	18	66.9	65.4		1	2016-09-21	NCR	Paranaque	1	<5000 PHP	Secondly	0	0	0		0	0		1	0	0							0	0	1	0	0	0	1	0	0
353	0	2015-04-13	1	1	1	2016-09-22	2	0	2016-09-22	2016-09-17	6	2016-09-24	2016-09-27	6	63.5	0		0		NCR	Manila	0	10000-15000 PHP	Secondly	1	0	1	others	0	0		1	1	1	2016-09-22	0	06:00:00	Unknown	Others		1	0	0	0	0	0	1	1	0
354	0	2010-06-22	6	2	1	2016-09-22	2	0	2016-09-22	2016-09-18	5	2016-09-23	2016-09-28	7	63.8	64.8		0		NCR	Caloocan	1	<5000 PHP	Secondly	0	0	0		0	0		1	0	0							0	0	0	0	0	0	1	1	0
355	0	2009-02-27	7	2	0	2016-09-22	2	0	2016-09-22	2016-09-19	4	2016-09-23	2016-09-30	9	66.2	65		0		NCR	Valenzuela	1	5000-10000 PHP	Secondly	0	0	0		0	0		1	0	0							0	1	0	1	0	0	1	1	0
356	0	2014-09-01	2	1	0	2016-09-23	2	0	2016-09-23	2016-09-22	2	2016-09-25	2016-09-29	7	63.5	63.3		0		NCR	Manila	0	<5000 PHP	Secondly	0	0	0		0	0		0	0	0							0	0	0	0	0	0	1	1	0
357	0	2014-06-10	2	1	0	2016-09-23	2	0	2016-09-23	2016-09-21	3	2016-09-24	2016-09-26	4	61.3	0		0		NCR	Caloocan	1	5000-10000 PHP	Secondly	0	0	0		0	0		1	0	0							0	1	0	1	0	0	1	0	0
359	0	1996-04-01	20	3	0	2016-09-25	2	1	2016-09-26	2016-09-18	8	2016-09-26	2016-10-03	9	0	0		1	2016-09-26	NCR	Malabon	1	5000-10000 PHP	Tertiary	0	0	0		1	1	2	1	0	0							0	1	1	0	0	0	1	1	0
360	0	2014-06-18	2	1	1	2016-09-25	2	1	2016-09-26	2016-09-23	3	2016-09-26	2016-10-10	16	0	0		0		NCR		1	<5000 PHP	Secondly	0	0	0		0	0		1	1	1				Unknown	Unknown		1	0	0	0	0	0	1	0	0
361	0	1996-04-22	20	3	0	2016-09-26	2	1	2016-09-27	2016-09-24	3	2016-09-29	2016-10-13	18	64.1	65.3		0		NCR	Mandaluyong	1	<5000 PHP	Tertiary	0	0	0		2	0		1	0	0							0	1	1	0	0	0	1	0	0
362	0	1991-11-04	24	3	0	2016-09-26	2	1	2016-09-27	2016-09-12	15	2016-09-27	2016-10-02	7	65.1	65.4		1	2016-09-27	Region 4		2	<5000 PHP	Secondly	0	0	0		1	0		1	0	0							0	1	1	1	0	0	0	0	0
363	0	1948-09-07	68	3	1	2016-09-26	2	1	2016-09-27	2016-09-25	2	2016-09-27	2016-09-30	5	0	0		0		NCR	Manila	0	5000-10000 PHP	Tertiary	0	0	1	lung disease	0	0		0	0	0							0	0	0	0	0	0	1	1	0
364	0	2013-07-29	3	1	0	2016-09-28	2	0	2016-09-28	2016-09-21	8	2016-09-29	2016-10-15	18	0	0		0		Region 4		2	10000-15000 PHP	Primary	0	0	0		0	0		1	0	0							0	1	1	1	1	1	1	1	0
365	0	1993-12-11	22	3	1	2016-09-27	2	2	2016-09-29	2016-09-21	7	2016-09-28	2016-10-06	10	0	0		0		NCR	Manila	0	10000-15000 PHP	Tertiary	0	0	0		2	0		1	1	3	2016-09-27	0	09:00:00	B-lactamase Inhibitors	Co-Amoxiclav		1	1	1	1	1	1	0	1	0
366	0	1949-02-10	67	3	0	2016-09-29	2	1	2016-09-30	2016-09-27	3	2016-09-30	2016-10-04	6	0	0		0		NCR	Manila	0	<5000 PHP	Secondly	1	0	1	others	0	0		1	0	0							0	1	1	0	1	1	1	0	0
368	0	1974-04-30	42	3	1	2016-10-02	2	1	2016-10-03	2016-09-18	15	2016-10-03	2016-10-09	8	0	0		0		NCR	Paranaque	1	<5000 PHP	Secondly	0	0	0		0	0		0	0	0							0	1	1	0	0	0	1	0	0
369	0	1952-08-25	64	3	0	2016-10-03	2	0	2016-10-03	2016-09-30	4	2016-10-04	2016-10-08	6	60.9	61		0		NCR	Caloocan	1	<5000 PHP	Secondly	1	0	0		0	1	30	1	0	0							0	0	0	0	0	0	1	0	0
370	0	1992-06-29	24	3	0	2016-10-03	2	0	2016-10-03	2016-09-27	7	2016-10-05	2016-10-13	11	0	67.8		0		NCR	Manila	0	<5000 PHP	Tertiary	1	0	0		1	0		1	0	0							0	0	0	1	0	0	1	1	0
371	0	1997-07-02	19	3	1	2016-10-03	2	1	2016-10-04	2016-10-02	2	2016-10-04	2016-10-06	4	0	0		0		NCR	Valenzuela	1	5000-10000 PHP	Secondly	0	0	0		2	1	8	0	0	0							0	1	0	1	0	0	1	0	0
372	0	2010-02-18	6	2	0	2016-10-04	2	0	2016-10-04	2016-09-28	7	2016-10-04	2016-10-09	6	61.4	60.3		0		NCR	Manila	0	5000-10000 PHP	Tertiary	0	0	0		0	0		1	1	5	2016-10-03	1	20:00:00	Penicillines	Amoxicillin		1	0	1	0	0	0	1	0	0
373	0	2012-12-12	3	1	0	2016-10-04	2	0	2016-10-04	2016-10-02	3	2016-10-05	2016-10-15	12	60	60.9		0		NCR	Manila	0	<5000 PHP	Secondly	0	0	1	others	0	0		1	0	0							0	0	0	0	0	0	1	1	0
374	0	1955-12-27	60	3	0	2016-10-04	2	1	2016-10-05	2016-09-21	14	2016-10-05	2016-10-11	8	0	0		0		NCR	Pasig	1	<5000 PHP	Primary	0	0	0		0	0		1	0	0							0	1	0	0	0	0	1	1	0
375	0	1962-05-17	54	3	1	2016-10-03	2	2	2016-10-05	2016-09-30	4	2016-10-04	2016-10-10	8	0	0		0		NCR	Caloocan	1	<5000 PHP	Secondly	0	0	1	others	2	0		1	0	0							0	0	1	0	0	0	1	0	0
376	0	2015-07-21	1	1	0	2016-10-03	2	2	2016-10-05	2016-09-29	5	2016-10-04	2016-10-12	10	0	0		0		NCR	Malabon	1	<5000 PHP	Secondly	0	0	0		0	0		1	0	0							0	0	0	1	1	1	0	0	0
377	0	1998-01-16	18	3	0	2016-10-05	2	1	2016-10-06	2016-10-01	5	2016-10-06	2016-10-09	5	0	0		0		NCR	Taguig	1	10000-15000 PHP	Secondly	0	1	0		2	1	4	1	1	1	2016-10-04	1	21:00:00	Cephalosporines	Cefuroxime	Pharmacy	0	0	1	0	1	1	1	0	0
378	0	2008-09-19	8	2	1	2016-10-06	2	0	2016-10-06	2016-10-01	6	2016-10-07	2016-10-09	4	62.2	60		0		NCR	Pasay	1	<5000 PHP	Tertiary	0	0	0		0	0		1	0	0							0	0	1	0	1	1	1	1	0
379	0	2007-01-07	9	2	1	2016-10-06	2	0	2016-10-06	2016-10-01	6	2016-10-07	2016-10-12	7	62.5	62.3		0		NCR	Caloocan	1	5000-10000 PHP	Tertiary	0	0	0		0	0		1	0	0							0	0	0	0	0	0	1	0	0
380	0	2013-01-24	3	1	1	2016-10-07	2	0	2016-10-07	2016-10-06	2	2016-10-08	2016-10-22	16	0	62.5		0		Region 4		2	10000-15000 PHP	Tertiary	0	0	0		0	0		1	1	1	2016-10-07	0		Cephalosporines	Others	Other Hospital	1	1	1	0	1	1	1	0	0
381	0	1970-06-01	46	3	0	2016-10-10	2	0	2016-10-10	2016-10-06	5	2016-10-11	2016-10-15	6	0	0		0		NCR	Malabon	1	<5000 PHP	Primary	0	0	0		2	0		1	0	0							0	1	1	1	0	0	0	0	0
382	0	2014-03-11	2	1	0	2016-10-10	2	1	2016-10-11	2016-10-03	8	2016-10-11	2016-10-27	18	0	0		0		Region 4		2	<5000 PHP	Primary	0	0	0		0	0		1	1	4	2016-10-04	6	17:00:00	Cephalosporines	Cephalexin	Pharmacy	1	1	0	0	1	1	1	0	0
383	0	1996-12-23	19	3	1	2016-10-10	2	1	2016-10-11	2016-10-07	4	2016-10-11	2016-10-13	4	65.9	65.5		0		NCR	Caloocan	1	<5000 PHP	Secondly	0	0	0		2	1	4	1	0	0							0	0	1	1	0	0	1	0	0
384	0	2010-12-02	5	2	1	2016-10-12	2	0	2016-10-12	2016-10-10	3	2016-10-22	2016-10-27	16	63.4	67.4		0		NCR	Malabon	1	10000-15000 PHP	Secondly	1	0	0		0	0		1	0	0							0	1	1	1	0	1	0	0	0
385	0	1996-04-04	20	3	0	2016-10-12	2	1	2016-10-13	2016-10-03	10	2016-10-13	2016-10-16	5	0	0		0		Region 4		2	<5000 PHP	Vocational	0	0	0		2	0		1	1	2	2016-10-11	1	08:00:00	B-lactamase Inhibitors	Co-Amoxiclav	Pharmacy	1	1	1	0	0	1	1	1	0
386	0	1993-09-10	23	3	1	2016-10-13	2	0	2016-10-13	2016-10-08	6	2016-10-14	2016-10-22	10	0	65.5		1	2016-10-13	Region 3		2	<5000 PHP	Tertiary	0	0	0		2	1	1	1	1	4	2016-10-13	0	12:00:00	Penicillines	Cloxacillin	Other Hospital	1	1	1	1	1	1	1	1	0
389	0	1956-04-04	60	3	0	2016-10-17	2	0	2016-10-17	2016-10-03	15	2016-10-18	2016-10-22	6	60.9	66.9		0		NCR	Manila	0	<5000 PHP	none	0	0	0		0	1	15	1	1	5	2016-10-17	0	06:00:00	Penicillines	Amoxicillin	Pharmacy	1	1	1	0	0	0	1	0	0
390	0	1970-03-14	46	3	1	2016-10-18	2	0	2016-10-18	2016-10-12	7	2016-10-19	2016-10-28	11	61.1	67.2		0		NCR	Quezon	1	<5000 PHP	Tertiary	1	0	1	others	2	0		1	1	5	2016-10-18	0	06:00:00	Penicillines	Cloxacillin	Pharmacy	9	0	0	0	1	1	0	0	0
391	0	1977-09-28	39	3	1	2016-10-19	2	0	2016-10-19	2016-10-13	7	2016-10-20	2016-10-27	9	0	0		0		NCR	Pasay	1	<5000 PHP	Secondly	0	0	0		2	0		1	0	0							0	0	0	0	0	0	1	1	0
392	0	2010-09-05	6	2	0	2016-10-19	2	0	2016-10-19	2016-10-15	5	2016-10-22	2016-11-15	28	0	0		0		Region 3		2	5000-10000 PHP	Secondly	0	0	0		0	0		1	0	0							0	1	1	1	1	1	1	1	0
393	0	2001-08-27	15	2	0	2016-10-19	2	1	2016-10-20	2016-09-29	21	2016-10-27	2016-10-30	12	0	0		0		Region 3		2	10000-15000 PHP	Secondly	0	0	0		0	0		1	1	7	2016-10-07	12	19:00:00	Cephalosporines	Cefixime	Pharmacy	9	0	1	1	0	0	0	0	0
394	0	1991-08-15	25	3	1	2016-10-25	2	1	2016-10-26	2016-10-22	4	2016-10-26	2016-10-29	5	0	0		0		NCR	Manila	0	<5000 PHP	Secondly	0	0	0		2	1	14	1	1	1	2016-10-25	0	12:00:00	Fluoroqunolones	Ciprofloxacin	Pharmacy	1	1	1	1	0	0	0	0	0
395	0	2001-09-30	15	2	0	2016-10-26	2	0	2016-10-26	2016-10-16	11	2016-10-27	2016-11-03	9	64.2	63.3		0		NCR	Manila	0	10000-15000 PHP	Tertiary	0	0	1	others	0	0		1	0	0							0	0	0	0	0	0	1	0	0
396	0	1964-04-13	52	3	1	2016-10-26	2	0	2016-10-26	2016-10-12	15	2016-10-27	2016-11-12	18	62.5	64.9		0		Region 4		2	<5000 PHP	Secondly	1	0	1	diabetes	1	1	9	1	0	0							0	1	1	1	0	0	1	1	0
397	0	1991-09-09	25	3	0	2016-10-27	2	0	2016-10-27	2016-10-21	7	2016-10-28	2016-10-28	2	0	67.1		0		NCR	Quezon	1	<5000 PHP	Tertiary	0	0	0		2	1	15	1	0	0							0	0	1	1	1	0	0	1	0
398	0	1973-02-03	43	3	0	2016-11-03	2	0	2016-11-03	2016-10-20	15	2016-11-04	2016-11-07	5	67	66.1		0		Region 4		2	<5000 PHP	Secondly	0	0	1	others	2	0		0	0	0							0	0	0	0	0	0	1	0	0
399	0	1962-08-24	54	3	1	2016-11-04	2	0	2016-11-04	2016-11-02	3	2016-11-05	2016-11-08	5	66.2	67.7		1	2016-11-04	NCR	Manila	0	<5000 PHP	Primary	0	0	0		2	0		1	0	0							0	0	1	0	0	0	0	0	1
400	0	1963-10-17	53	3	0	2016-11-04	2	0	2016-11-04	2016-10-31	5	2016-11-05	2016-11-22	19	0	0		0		NCR	Valenzuela	1	<5000 PHP	Secondly	0	0	1	others	0	0		1	1	1	2016-11-03	1	06:00:00	Co-trimo	Co-trimoxazole		1	0	1	1	0	0	0	1	0
401	0	2010-10-28	6	2	1	2016-11-04	2	0	2016-11-04	2016-11-01	4	2016-11-06	2016-11-09	6	0	0		0		NCR	Malabon	1	5000-10000 PHP	Primary	0	0	1	others	0	0		1	0	0							0	1	0	0	1	0	1	1	0
403	0	1989-09-23	27	3	0	2016-11-07	2	1	2016-11-08	2016-11-03	5	2016-11-08	2016-11-16	10	0	0		0		NCR	Caloocan	1	<5000 PHP	Secondly	0	0	0		2	1	4	1	0	0							0	1	1	0	0	0	0	1	0
404	0	1958-04-14	58	3	1	2016-11-07	2	2	2016-11-09	2016-11-01	7	2016-11-08	2016-11-23	17	0	0		0		NCR	Manila	0	<5000 PHP	Secondly	0	0	0		1	1	3	1	0	0							0	0	0	0	1	0	1	0	0
405	0	1996-06-24	20	3	1	2016-11-10	2	0	2016-11-10	2016-11-05	6	2016-11-11	2016-11-14	5	67.2	66.7		1	2016-11-10	NCR	Taguig	1	<5000 PHP	Tertiary	0	0	0		2	0		1	1	2	2016-11-08	2	17:00:00	Unknown	Unknown	Pharmacy	0	1	1	0	0	0	0	1	0
406	0	1987-06-10	29	3	1	2016-11-11	2	0	2016-11-11	2016-11-07	5	2016-11-13	2016-11-18	8	62.4	61.4		0		NCR	Manila	0	5000-10000 PHP	Secondly	0	0	0		2	1	6	1	1	2	2016-11-11	0	09:00:00	Unknown	Unknown	Pharmacy	0	0	1	1	1	0	0	1	0
408	0	1994-01-15	22	3	1	2016-11-15	2	2	2016-11-17	2016-11-01	15	2016-11-17	2016-11-18	4	0	0		0		NCR	Manila	0	5000-10000 PHP	Secondly	0	0	0		1	1		1	1	7	2016-11-08	7	20:00:00	Penicillines	Cloxacillin	Public health center	1	0	0	0	0	0	1	1	0
409	0	1953-08-13	63	3	1	2016-11-17	2	0	2016-11-17	2016-11-11	7	2016-11-18	2016-11-22	6	65	68.1		0		NCR	Manila	0	<5000 PHP	Primary	0	0	0		2	1	45	1	0	0							0	0	1	0	0	0	1	0	0
410	0	1977-06-10	39	3	1	2016-11-18	2	0	2016-11-18	2016-11-15	4	2016-11-19	2016-11-23	6	0	0		0		NCR	Manila	0	<5000 PHP	Primary	0	0	0		2	1	6	1	0	0							0	0	1	0	0	0	1	0	1
411	0	1940-10-22	76	3	0	2016-11-18	2	0	2016-11-18	2016-11-14	5	2016-11-19	2016-11-22	5	68	67.6		0		Region 3		2	<5000 PHP	Primary	1	0	1	others	0	0		1	0	0							0	0	1	0	0	0	1	0	0
412	0	1989-03-24	27	3	0	2016-11-19	2	2	2016-11-21	2016-11-14	6	2016-11-21	2016-11-24	6	0	0		0		NCR	Quezon	1	<5000 PHP	Secondly	0	0	0		0	0		1	1	4	2016-11-19	0	10:15:00	Cephalosporines	Cefuroxime	SLH	1	0	1	1	0	0	1	1	0
413	0	1993-01-17	23	3	0	2016-11-22	2	0	2016-11-22	2016-11-21	2	2016-11-23	2016-11-26	5	60.6	62.8		1	2016-11-22	NCR	Manila	0	<5000 PHP	Primary	0	0	0		2	1	10	0	0	0							0	0	0	0	0	0	1	1	0
414	0	1981-03-01	35	3	1	2016-11-22	2	0	2016-11-22	2016-11-15	8	2016-11-23	2016-11-28	7	63.8	64		1	2016-11-22	NCR	Manila	0	5000-10000 PHP	Tertiary	0	0	0		0	0		1	0	0							0	1	1	0	1	1	1	1	0
415	0	2006-09-30	10	2	0	2016-11-24	2	0	2016-11-24	2016-11-18	7	2016-11-25	2016-11-30	7	62	66.6		0		NCR	Manila	0	10000-15000 PHP	Secondly	0	0	0		0	0		1	1	3	2016-11-24	0	03:00:00	B-lactamase Inhibitors	Co-Amoxiclav	Pharmacy	0	0	1	0	1	0	0	0	0
416	0	1984-10-01	32	3	1	2016-11-25	2	0	2016-11-25	2016-11-13	13	2016-11-26	2016-12-13	19	0	0		0		NCR	Caloocan	1	5000-10000 PHP	Secondly	0	0	1	others	2	1	15	1	1	13	2016-11-24	1	19:00:00	Penicillines	Cloxacillin	Pharmacy	1	0	1	1	0	0	1	0	0
417	0	1965-01-05	51	3	0	2016-12-01	2	0	2016-12-01	2016-11-28	4	2016-12-02	2016-12-05	5	66.1	66.6		0		NCR	Caloocan	1	<5000 PHP	Secondly	0	0	0		0	1	7	1	0	0							0	0	1	0	0	0	0	1	0
418	0	2009-08-15	7	2	1	2016-12-01	2	1	2016-12-02	2016-11-11	21	2016-12-03	2016-12-15	15	0	0		0		Region 3		2	<5000 PHP	Primary	0	0	0		0	0		1	0	0							0	0	0	0	0	0	0	0	0
419	0	2008-11-11	8	2	0	2016-12-05	2	0	2016-12-05	2016-11-30	6	2016-12-07	2016-12-12	8	69	68.3		0		NCR	Manila	0	<5000 PHP	Secondly	0	0	0		0	0		1	0	0							0	0	1	0	0	0	1	1	0
420	0	1992-11-02	24	3	0	2016-12-06	2	0	2016-12-06	2016-12-03	4	2016-12-08	2016-12-09	4	0	0		0		NCR	Manila	0	<5000 PHP	Secondly	0	0	0		2	0		1	0	0							0	0	1	0	0	0	1	0	0
421	1	1990-11-10	26	3	0	2016-12-07	2	0	2016-12-07	2016-12-01	7	2016-12-08	2016-12-10	4	66.9	66.7		0		NCR	Caloocan	1	15000-20000 PHP	Tertiary	0	0	0		0	0		1	0	0							0	0	1	1	0	1	1	0	0
422	1	1998-06-21	18	3	1	2016-12-07	2	0	2016-12-07	2016-12-04	4	2016-12-08	2016-12-12	6	66.4	0		0		NCR	Manila	0	5000-10000 PHP	Vocational	0	0	0		0	0		1	0	0							0	1	1	0	1	0	0	0	0
423	0	1964-04-05	52	3	1	2016-12-08	2	0	2016-12-08	2016-12-05	4	2016-12-09	2016-12-16	9	64.9	63.6		0		NCR	Manila	0	<5000 PHP	Primary	1	0	1	others	2	0		1	0	0							0	0	1	1	0	0	0	1	1
424	0	2014-07-15	2	1	1	2016-12-08	2	1	2016-12-09	2016-12-04	5	2016-12-09	2016-12-19	12	0	0		0		Region 4		2	<5000 PHP	Secondly	0	0	0		0	0		1	0	0							0	1	1	1	1	1	1	1	0
425	1	1971-07-01	45	3	1	2016-12-08	2	1	2016-12-09	2016-12-02	7	2016-12-10	2016-12-13	6	0	0		0		NCR	Manila	0	<5000 PHP	Secondly	0	0	0		2	1	60	1	1		2016-12-05	3	20:00:00	Unknown	Unknown	Others	0	0	1	1	0	1	1	0	0
427	0	1956-01-23	60	3	0	2016-12-12	2	0	2016-12-12	2016-11-28	15	2016-12-13	2016-12-17	6	72.9	71.1		0		Region 3		2	<5000 PHP	Secondly	1	0	1	diabetes	0	0		1	1	5	2016-12-12	0	09:00:00	B-lactamase Inhibitors	Co-Amoxiclav		0	0	0	0	0	0	1	1	0
428	0	1986-04-07	30	3	1	2016-12-12	2	0	2016-12-12	2016-12-09	4	2016-12-13	2016-12-15	4	0	0		0		NCR	Manila	0	<5000 PHP	Secondly	0	0	0		2	1	4	1	0	0							0	0	1	1	0	0	0	0	0
429	0	2010-08-06	6	2	1	2016-12-13	2	0	2016-12-13	2016-12-10	4	2016-12-14	2016-12-22	10	0	0		0		NCR	Paranaque	1	<5000 PHP	Primary	0	0	0		0	0		1	0	0							0	1	0	0	0	0	1	0	0
430	1	2013-07-09	3	1	0	2016-12-14	2	0	2016-12-14	2016-12-10	5	2016-12-19	2016-12-26	13	64.9	65.4		0		Region 4		2	5000-10000 PHP	Tertiary	0	0	0		0	0		1	0	0				B-lactamase Inhibitors	Co-Amoxiclav		1	1	1	0	1	1	1	0	0
431	1	1999-09-28	17	2	0	2016-12-14	2	0	2016-12-14	2016-12-11	4	2016-12-15	2016-12-19	6	65.4	65.2		0		NCR	Manila	0	<5000 PHP	Tertiary	0	0	1	others	0	0		1	0	0							0	0	1	1	0	0	1	0	0
432	0	2014-06-12	2	1	1	2016-12-15	2	0	2016-12-15	2016-12-12	4	2016-12-17	2016-12-22	8	0	0		0		NCR	Quezon	1	5000-10000 PHP	Tertiary	1	0	0		0	0		1	1		2016-12-14	1	21:00:00	Unknown	Unknown	Private Clinic	1	1	0	0	0	0	1	0	0
433	0	2013-11-21	3	1	1	2016-12-16	2	0	2016-12-16	2016-12-11	6	2016-12-17	2016-12-17	2	0	0		0		Region 3		2	<5000 PHP	Secondly	0	0	1	others	0	0		1	0	0							0	1	0	1	0	0	1	1	0
434	0	2005-07-08	11	2	0	2016-12-19	2	0	2016-12-19	2016-12-16	4	2016-12-21	2016-12-25	7	67.3	65.4		0		NCR	Manila	0	5000-10000 PHP	Secondly	0	0	1	others	0	0		1	1	2	2016-12-18	1	20:00:00	Penicillines	Amoxicillin		0	0	1	0	0	0	0	1	0
435	0	1995-05-14	21	3	0	2016-12-19	2	0	2016-12-19	2016-12-17	3	2016-12-20	2016-12-20	2	0	0		0		Region 4		2	15000-20000 PHP	Tertiary	0	0	0		0	0		1	0	0							0	1	1	0	1	1	1	1	0
436	1	2012-10-23	4	1	0	2017-01-04	2	0	2017-01-04	2017-01-01	4	2017-01-05	2017-01-10	7	0	70.3		0		NCR	Paranaque	1	<5000 PHP	Secondly	0	0	0		0	0		1	0	0							0	0	1	0	1	1	1	0	0
437	1	2004-05-06	12	2	1	2017-01-04	2	0	2017-01-04	2016-12-31	5	2017-01-05	2017-01-11	8	67.7	67.4		0		NCR	Manila	0	<5000 PHP	Secondly	0	0	1	others	0	0		1	1	3	2017-01-04	0	12:00:00	Unknown	Unknown		0	1	1	0	1	1	1	0	1
438	0	2013-01-07	3	1	1	2017-01-05	2	0	2017-01-05	2016-12-30	7	2017-01-08	2017-01-23	19	0	67.9		0		Region 3		2	5000-10000 PHP	Secondly	0	0	1	others	0	0		1	1	5	2017-01-03	2	10:00:00	Cephalosporines	Cephalexin	Pharmacy	1	1	0	0	0	0	1	1	0
439	0	2000-05-02	16	2	0	2017-01-05	2	0	2017-01-05	2016-12-29	8	2017-01-08	2017-01-11	7	0	0		0		NCR	Caloocan	1	<5000 PHP	Secondly	0	0	0		0	0		1	1	3	2017-01-05	0	07:00:00	Chloramphenicol	Chloramphenicol	Pharmacy	1	0	1	0	0	0	0	1	0
440	0	2003-05-13	13	2	1	2017-01-05	2	0	2017-01-05	2016-12-29	8	2017-01-08	2017-01-11	7	0	66.6		0		NCR	Caloocan	1	<5000 PHP	Secondly	0	0	0		0	0		1	0	0							0	0	1	0	1	1	0	0	0
441	0	1965-06-03	51	3	1	2017-01-06	2	0	2017-01-06	2016-12-17	21	2017-01-08	2017-01-23	18	68.2	67		1	2017-01-06	NCR	Taguig	1	<5000 PHP	Vocational	0	0	0		0	0		1	1	4	2017-01-05	1	21:00:00	Fluoroqunolones	Ciprofloxacin	Pharmacy	1	0	0	0	1	1	1	0	0
442	0	1957-03-15	59	3	1	2017-01-06	2	0	2017-01-06	2016-12-24	14	2017-01-07	2017-01-14	9	0	67.9		1	2017-01-06	Region 4		2	<5000 PHP	Primary	0	0	0		2	1	8	1	0	0							0	1	1	0	1	0	0	0	0
443	0	1991-12-10	25	3	1	2017-01-08	2	1	2017-01-09	2017-01-04	5	2017-01-11	2017-01-17	10	0	0		1	2017-01-09	NCR	Paranaque	1	10000-15000 PHP	Primary	0	0	0		2	0		1	1	1	2017-01-08	0	16:00:00	Penicillines	Amoxicillin	Others	0	0	0	1	1	0	1	1	0
444	0	1978-08-21	38	3	1	2017-01-09	2	0	2017-01-09	2017-01-01	9	2017-01-10	2017-01-14	6	0	67		0		NCR	Manila	0	<5000 PHP	Secondly	1	0	1	others	2	1	6	0	0	0							0	1	0	0	0	0	1	1	0
445	0	1963-07-23	53	3	1	2017-01-09	2	1	2017-01-10	2017-01-06	4	2017-01-10	2017-01-13	5	0	0		0		NCR	Manila	0	5000-10000 PHP	Tertiary	0	0	0		0	0		1	0	0							0	0	1	0	0	0	0	0	0
446	0	1994-09-28	22	3	1	2017-01-09	2	1	2017-01-10	2017-01-02	8	2017-01-10	2017-01-12	4	0	0		0		NCR	Quezon	1	<5000 PHP	Secondly	0	0	0		2	1	6	1	0	0							0	1	1	1	1	0	1	0	0
447	0	1994-09-21	22	3	0	2017-01-08	2	2	2017-01-10	2016-12-31	9	2017-01-18	2017-01-29	22	0	0		0		NCR	Manila	0	10000-15000 PHP	Tertiary	0	0	0		0	0		1	0	0							0	0	1	1	0	0	1	0	0
448	0	1997-08-14	19	3	0	2017-01-09	2	1	2017-01-10	2016-12-20	21	2017-01-12	2017-01-17	9	0	0		0		NCR	Caloocan	1	<5000 PHP	Tertiary	0	0	0		0	0		1	1	7	2016-12-30	10	18:00:00	Unknown	Unknown	Pharmacy	1	1	1	1	0	0	0	0	0
449	0	1953-01-02	64	3	1	2017-01-10	2	0	2017-01-10	2016-12-21	21	2017-01-12	2017-01-16	7	69.4	70.3		0		NCR	Malabon	1	<5000 PHP	Secondly	0	0	0		1	1	15	1	0	0							0	1	1	0	0	0	1	1	0
450	0	1980-08-16	36	3	0	2017-01-11	2	0	2017-01-11	2016-12-29	14	2017-01-12	2017-01-15	5	67.5	69.5		0		Region 4		2	<5000 PHP	Secondly	0	0	0		2	0		1	1	5	2017-01-10	1	18:00:00	B-lactamase Inhibitors	Co-Amoxiclav	Pharmacy	1	1	1	1	0	0	1	1	0
451	1	1996-10-02	20	3	1	2017-01-11	2	0	2017-01-11	2017-01-08	4	2017-01-12	2017-01-17	7	67.1	70		0		Region 4		2	5000-10000 PHP	Vocational	0	0	0		2	0		1	0	0							0	0	1	0	1	1	0	0	0
452	1	1991-11-30	25	3	1	2017-01-11	2	0	2017-01-11	2017-01-09	3	2017-01-12	2017-01-15	5	67.3	68.3		0		NCR	Paranaque	1	5000-10000 PHP	Secondly	0	0	0		2	1	6	1	0	0							0	0	1	1	1	1	1	0	0
453	0	1988-11-01	28	3	0	2017-01-08	2	0	2017-01-08	2017-01-02	7	2017-01-10	2017-01-18	11	0	0		0		NCR	Pasay	1	<5000 PHP	Secondly	0	0	0		2	1	3	1	0	0							0	0	1	0	0	0	1	0	0
454	0	2009-12-30	7	2	0	2017-01-11	2	1	2017-01-12	2017-01-02	10	2017-01-14	2017-01-23	13	0	0		0		NCR	Quezon	1	10000-15000 PHP	Secondly	0	0	0		0	0		1	1	2	2017-01-11	0	20:30:00	Penicillines	Amoxicillin	Pharmacy	1	0	1	0	1	1	0	0	0
455	0	1997-03-18	19	3	1	2017-01-12	2	0	2017-01-12	2017-01-10	3	2017-01-13	2017-01-23	12	68.6	67.9		0		NCR	Quezon	1	5000-10000 PHP	none	0	0	0		2	1	6	1	0	0							0	1	1	1	0	0	1	1	0
456	0	1970-10-17	46	3	1	2017-01-15	2	1	2017-01-16	2017-01-12	4	2017-01-16	2017-01-19	5	0	0		0		NCR	Caloocan	1	5000-10000 PHP	Secondly	0	0	1	others	1	0		1	1	2	2017-01-14	1	12:00:00	Fluoroqunolones	Ciprofloxacin	Pharmacy	1	0	1	1	1	0	0	1	0
457	0	1970-01-15	47	3	0	2017-01-16	2	0	2017-01-16	2017-01-13	4	2017-01-17	2017-01-20	5	67.3	67		1	2017-01-16	NCR	Paranaque	1	<5000 PHP	Secondly	0	0	0		2	0		1	0	0							0	1	1	1	0	0	1	0	0
458	0	1987-02-16	29	3	1	2017-01-17	2	1	2017-01-18	2017-01-10	8	2017-01-18	2017-01-27	11	0	0		0		NCR	Manila	0	<5000 PHP	Secondly	0	0	0		2	1	15	1	1	1	2017-01-16	1	09:00:00	Macrolides	Azithromycin	Pharmacy	1	1	1	1	0	0	1	1	0
459	1	1981-06-02	35	3	1	2017-01-18	2	0	2017-01-18	2017-01-13	6	2017-01-19	2017-01-21	4	65.1	66.9		0		NCR	Navotas	1	<5000 PHP	Primary	0	0	0		2	1	8	1	0	0							0	1	1	1	0	0	0	1	0
460	1	2004-01-06	13	2	1	2017-01-18	2	0	2017-01-18	2017-01-16	3	2017-01-20	2017-01-23	6	66	65.5		0		NCR	Caloocan	1	<5000 PHP	Tertiary	0	0	0		0	0		1	0	0							0	1	1	1	0	0	0	0	0
461	0	1968-01-26	48	3	1	2017-01-18	2	2	2017-01-20	2017-01-14	5	2017-01-20	2017-01-28	11	0	69.2		0		Region 4		2	<5000 PHP	Primary	0	0	0		2	1	3	1	1	4	2017-01-16	2		Penicillines	Amoxicillin	Pharmacy	1	0	1	1	0	1	0	0	0
462	0	1945-12-07	71	3	1	2017-01-22	2	1	2017-01-23	2017-01-19	4	2017-01-23	2017-01-31	10	0	0		0		Region 4		2	<5000 PHP	Secondly	1	0	1	diabetes	2	0		1	1	2	2017-01-21	1	17:00:00	Penicillines	Amoxicillin	Pharmacy	1	1	1	0	1	0	0	0	0
464	0	1982-02-24	34	3	0	2017-01-24	2	0	2017-01-24	2017-01-19	6	2017-01-25	2017-01-30	7	0	0		1	2017-01-24	NCR	Manila	0	<5000 PHP	Secondly	0	0	0		0	0		1	1	4	2017-01-24	0	08:00:00	Fluoroqunolones	Ciprofloxacin		1	0	0	0	0	0	0	0	0
465	0	1961-12-12	55	3	0	2017-01-24	2	1	2017-01-25	2017-01-22	3	2017-01-25	2017-01-27	4	0	0		0		NCR	Paranaque	1	<5000 PHP	Primary	0	0	0		2	0		1	0	0							0	1	1	0	0	0	1	0	0
466	1	2002-04-27	14	2	0	2017-01-25	2	0	2017-01-25	2017-01-19	7	2017-01-26	2017-01-28	4	62.89	65.29		0		NCR	Manila	0	5000-10000 PHP	Vocational	0	0	0		0	0		1	1	1	2017-01-25	0	06:00:00	Cephalosporines	Cefuroxime	Pharmacy	1	1	1	0	0	0	0	0	0
467	0	2015-09-04	1	1	0	2017-01-25	2	1	2017-01-26	2017-01-24	2	2017-01-27	2017-01-30	6	0	0		0		NCR	Navotas	1	<5000 PHP	Secondly	0	0	1	others	0	0		1	0	0							0	1	0	1	0	0	1	0	0
468	1	1977-08-19	39	3	0	2017-01-25	2	1	2017-01-26	2017-01-15	11	2017-01-26	2017-02-01	8	0	0		0		NCR	Quezon	1	<5000 PHP	Tertiary	0	0	0		0	0		1	1	3	2017-01-22	3		Fluoroqunolones	Ciprofloxacin	Pharmacy	1	0	1	1	0	0	1	0	1
469	0	2015-06-09	1	1	0	2017-01-25	2	1	2017-01-26	2017-01-24	2	2017-01-31	2017-02-06	13	0	0		0		NCR	Quezon	1	<5000 PHP	Secondly	0	0	0		0	0		0	0	0							0	1	0	1	1	1	0	1	0
470	0	1997-07-15	19	3	1	2017-01-26	2	1	2017-01-27	2017-01-19	8	2017-01-28	2017-02-06	12	0	0		0		NCR	Malabon	1	<5000 PHP	Secondly	0	0	0		0	0		1	1	1	2017-01-25	1	17:00:00	B-lactamase Inhibitors	Co-Amoxiclav	Pharmacy	0	0	1	1	1	1	1	1	0
471	0	2005-10-18	11	2	0	2017-01-26	2	1	2017-01-27	2017-01-20	7	2017-01-27	2017-02-03	9	0	0		0		NCR	Valenzuela	1	5000-10000 PHP	Secondly	0	0	0		0	0		1	0	0							0	1	0	0	0	1	1	1	0
472	0	2010-03-15	6	2	1	2017-01-27	2	0	2017-01-27	2017-01-07	21	2017-01-30	2017-02-03	8	0	65.8		0		NCR	Manila	0	5000-10000 PHP	Secondly	0	0	0		0	0		1	1	7	2017-01-27	0	06:00:00	B-lactamase Inhibitors	Co-Amoxiclav	Pharmacy	1	0	1	1	0	1	1	1	0
473	0	1995-04-16	21	3	1	2017-01-27	2	0	2017-01-27	2017-01-12	16	2017-01-29	2017-02-02	7	65	67.8		0		NCR	Manila	0	<5000 PHP	Tertiary	0	0	0		2	0		1	1	5	2017-01-20	7	12:00:00	Macrolides	Azithromycin	Pharmacy	1	1	0	0	0	0	1	0	0
474	1	1977-01-01	40	3	1	2017-02-01	2	0	2017-02-01	2017-01-28	5	2017-02-02	2017-02-07	7	68.8	67.5		1	2017-02-01	NCR	Manila	0	10000-15000 PHP	Tertiary	0	0	0		2	0		1	0	0							0	0	1	0	1	1	1	0	0
475	0	1997-03-04	19	3	1	2017-01-31	2	2	2017-02-02	2017-01-29	3	2017-02-01	2017-02-18	19	0	0		1	2017-02-02	NCR	Caloocan	1	<5000 PHP	Secondly	0	0	0		2	1	6	0	0	0							0	1	1	0	1	1	1	0	0
476	0	2011-02-08	5	2	0	2017-02-02	2	0	2017-02-02	2017-01-27	7	2017-02-03	2017-02-07	6	66.2	65.7		0		NCR	Malabon	1	<5000 PHP	Tertiary	0	0	0		0	0		1	1	1	2017-02-01	1	20:00:00	Cephalosporines	Cefuroxime	Public health center	1	0	1	0	0	0	0	0	0
477	1	1995-02-17	21	3	1	2017-02-02	2	1	2017-02-03	2017-01-23	11	2017-02-03	2017-02-10	9	0	0		0		NCR	Caloocan	1	<5000 PHP	Secondly	0	0	0		0	0		1	1	5	2017-01-31	2	21:00:00	B-lactamase Inhibitors	Co-Amoxiclav	Public health center	1	0	1	1	0	0	1	1	0
478	0	2012-09-26	4	1	0	2017-02-03	2	0	2017-02-03	2017-01-27	8	2017-02-04	2017-02-08	6	0	65.3		0		NCR	Las Pinas	1	<5000 PHP	Secondly	0	0	0		0	0		1	1	5	2017-02-03	0	12:00:00	B-lactamase Inhibitors	Co-Amoxiclav	Other Hospital	1	1	0	0	0	0	1	1	0
479	0	2010-05-04	6	2	0	2017-02-03	2	0	2017-02-03	2017-01-28	7	2017-02-06	2017-02-12	10	0	0		0		NCR	Manila	0	5000-10000 PHP	Vocational	1	0	0		0	0		1	0	0							0	1	0	0	0	1	0	1	0
480	0	2009-04-25	7	2	1	2017-02-04	2	2	2017-02-06	2017-02-02	3	2017-02-05	2017-02-10	7	0	0		0		Region 3		2	5000-10000 PHP	Primary	1	0	0		0	0		1	0	0							0	1	1	0	0	1	1	1	1
481	0	1992-12-06	24	3	0	2017-02-06	2	0	2017-02-06	2017-01-31	7	2017-02-09	2017-02-10	5	67.4	67.8		1	2017-02-06	NCR	Manila	0	<5000 PHP	Secondly	0	0	0		0	1	22	0	0	0							0	0	1	0	0	1	0	1	0
482	0	1971-01-29	46	3	1	2017-02-04	2	2	2017-02-06	2017-02-01	4	2017-02-05	2017-02-09	6	0	0		0		NCR	Caloocan	1	<5000 PHP	Secondly	0	0	0		0	0		1	0	0							0	0	1	0	1	1	0	0	0
483	0	2011-11-18	5	2	1	2017-02-08	2	0	2017-02-08	2017-02-01	8	2017-02-09	2017-02-20	13	0	0		1	2017-02-08	Region 3		2	<5000 PHP	Secondly	0	0	0		0	0		0	0	0							0	1	0	0	0	0	1	1	0
484	1	2004-08-17	12	2	1	2017-02-08	2	0	2017-02-08	2017-02-03	6	2017-02-09	2017-02-10	3	67.1	66.4		0		NCR	Quezon	1	<5000 PHP	Secondly	1	0	1		0	0		1	0	0							0	0	1	0	1	1	1	1	0
485	0	2014-09-15	2	1	1	2017-02-09	2	0	2017-02-09	2017-02-05	5	2017-02-10	2017-02-25	17	0	64.4		0		NCR	Malabon	1	<5000 PHP	Secondly	1	0	0		0	0		1	1	1	2017-02-09	0	09:00:00	Unknown	Unknown	Pharmacy	9	0	0	0	0	0	1	0	0
486	0	2004-10-14	12	2	0	2017-02-09	2	0	2017-02-09	2017-02-06	4	2017-02-10	2017-02-24	16	0	66		0		NCR	Quezon	1	5000-10000 PHP	Secondly	0	0	0		0	0		1	0	0							0	0	1	0	0	0	1	0	0
487	0	2004-06-25	12	2	1	2017-02-10	2	0	2017-02-10	2017-02-08	3	2017-02-12	2017-03-03	22	0	0		0		NCR	Quezon	1	10000-15000 PHP	Primary	0	0	1	others	0	0		1	1	1	2017-02-10	0	04:00:00	B-lactamase Inhibitors	Co-Amoxiclav	Pharmacy	1	1	1	1	0	0	1	1	0
488	0	2014-01-08	3	1	1	2017-02-11	2	1	2017-02-12	2017-02-09	3	2017-02-13	2017-02-23	13	0	0		0		NCR	Paranaque	1	<5000 PHP	Secondly	0	0	0		0	0		1	0	0							0	0	0	0	1	1	1	1	0
489	0	2015-11-20	1	1	0	2017-02-12	2	2	2017-02-14	2017-02-09	4	2017-02-16	2017-02-17	6	0	0		0		NCR	Manila	0	<5000 PHP	Secondly	0	0	0		0	0		1	0	0							0	1	0	0	1	1	0	0	0
490	1	2000-04-07	16	2	0	2017-02-15	2	0	2017-02-15	2017-02-11	5	2017-02-16	2017-02-20	6	68.7	66.19		1	2017-02-15	NCR	Quezon	1	5000-10000 PHP	Secondly	0	0	0		0	0		1	0	0							0	1	1	0	0	0	0	0	0
491	0	1954-09-26	62	3	1	2017-02-14	2	1	2017-02-15	2017-02-01	14	2017-02-15	2017-03-07	22	0	0		0		NCR	Manila	0	<5000 PHP	Secondly	0	0	0		2	0		0	0	0							0	0	1	0	1	1	1	1	0
492	1	2008-10-23	8	2	0	2017-02-15	2	0	2017-02-15	2017-02-12	4	2017-02-16	2017-02-18	4	67.29	66.7		1	2017-02-15	NCR	Quezon	1	<5000 PHP	Primary	0	0	0		0	0		1	0	0							0	0	0	0	1	1	0	0	0
493	0	2013-09-18	3	1	0	2017-02-20	2	1	2017-02-21	2017-02-18	3	2017-02-22	2017-02-27	8	0	0		0		NCR	Taguig	1	10000-15000 PHP	Tertiary	0	0	0		0	0		1	0	0							0	0	0	0	0	0	0	0	0
494	0	2011-01-28	6	2	1	2017-02-20	2	1	2017-02-21	2017-02-18	3	2017-02-23	2017-02-28	9	0	0		0		NCR	Malabon	1	10000-15000 PHP	Tertiary	1	0	0		0	0		1	0	0							0	0	0	0	0	0	1	0	0
495	1	2010-05-26	6	2	0	2017-02-22	2	0	2017-02-22	2017-02-19	4	2017-02-23	2017-02-25	4	69.3	0		1	2017-02-22	NCR	Manila	0	<5000 PHP	Secondly	0	0	0		0	0		1	0	0							0	0	1	0	0	0	1	0	0
496	1	2000-03-17	16	2	0	2017-02-22	2	0	2017-02-22	2017-02-17	6	2017-02-23	2017-02-25	4	67	66.2		1	2017-02-22	NCR	Manila	0	<5000 PHP	Tertiary	0	0	0		0	0		1	1	4	2017-02-22	0	08:00:00	B-lactamase Inhibitors	Co-Amoxiclav	Pharmacy	1	0	1	0	1	1	0	0	0
497	0	2000-01-02	17	2	1	2017-02-23	2	0	2017-02-23	2017-02-09	15	2017-02-24	2017-03-02	8	68.8	66.9		1	2017-02-23	NCR	Caloocan	1	<5000 PHP	Primary	0	0	0		0	0		1	1	5	2017-02-22	1	20:00:00	Penicillines	Amoxicillin	Others	1	1	1	1	0	0	1	0	1
498	0	1996-10-19	20	3	0	2017-02-23	2	1	2017-02-24	2017-02-23	1	2017-02-26	2017-02-26	4	0	0		0		NCR	Paranaque	1	10000-15000 PHP	Vocational	0	0	0		0	0		1	0	0							0	1	1	0	0	0	1	1	0
499	0	1955-08-16	61	3	1	2017-02-23	2	1	2017-02-24	2017-02-20	4	2017-02-27	2017-03-01	7	0	0		0		NCR	Makati	1	10000-15000 PHP	Tertiary	1	0	1	diabetes	0	1	3	1	1	1	2017-02-23	0	23:00:00	Cephalosporines	Cephalexin	Pharmacy	0	0	0	1	0	1	1	0	0
500	0	1977-02-06	40	3	1	2017-02-23	2	1	2017-02-24	2017-02-20	4	2017-02-24	2017-02-28	6	0	0		1	2017-02-24	NCR	Manila	0	<5000 PHP	Secondly	0	0	1	diabetes	1	1	4	1	1	1	2017-02-22	1	20:00:00	Penicillines	Amoxicillin	Pharmacy	1	0	1	0	0	0	0	0	0
501	0	2009-10-04	7	2	0	2017-02-23	2	1	2017-02-24	2017-02-19	5	2017-02-24	2017-02-27	5	0	0		0		NCR	Quezon	1	<5000 PHP	Tertiary	0	0	0		0	0		1	0	0							0	0	0	0	0	0	0	0	0
502	0	1997-12-08	19	3	0	2017-02-24	2	0	2017-02-24	2017-02-21	4	2017-02-26	2017-02-27	4	68	67		0		NCR	Manila	0	<5000 PHP	Tertiary	0	0	0		0	0		1	0	0							0	0	1	0	0	0	0	0	1
503	1	1995-01-11	22	3	0	2017-03-01	2	0	2017-03-01	2017-02-26	4	2017-03-02	2017-03-06	6	68.2	67.4		1	2017-03-02	NCR	Manila	0	5000-10000 PHP	Secondly	0	0	0		0	0		1	0	0							0	0	1	0	0	0	0	0	0
504	1	2004-11-29	12	2	0	2017-03-02	2	0	2017-03-02	2017-02-28	3	2017-03-06	2017-03-10	9	67.5	66.5		1	2017-03-03	NCR	Manila	0	<5000 PHP	Vocational	0	0	0		0	0		1	0	0							0	0	1	0	1	1	0	0	0
505	0	1965-11-05	51	3	1	2017-03-03	2	0	2017-03-03	2017-02-27	5	2017-03-05	2017-03-12	10	66.1	66		0		NCR	Caloocan	1	<5000 PHP	Secondly	0	0	0		0	0		1	1	4				Unknown	Unknown	Other Hospital	1	0	1	0	1	0	0	0	0
506	0	1998-01-18	19	3	0	2017-03-07	2	0	2017-03-07	2017-03-04	4	2017-03-11	2017-03-12	6	66.8	67.4		1	2017-03-07	NCR	Manila	0	<5000 PHP	Secondly	0	0	0		0	0		1	0	0							0	0	1	0	0	0	0	1	0
507	0	2012-10-12	4	1	1	2017-03-08	2	0	2017-03-08	2017-03-04	5	2017-03-10	2017-03-11	4	0	66		1	2017-03-08	NCR	Caloocan	1	<5000 PHP	Secondly	0	0	0		0	0		1	0	0							0	0	1	0	0	0	0	0	0
508	0	2011-04-04	5	2	0	2017-03-08	2	1	2017-03-09	2017-03-06	3	2017-03-10	2017-03-24	17	0	0		0		Region 3		2	<5000 PHP	Vocational	0	0	0		0	0		1	0	0							0	0	0	0	0	0	1	1	0
509	1	2001-04-01	15	2	1	2017-03-09	2	0	2017-03-09	2017-03-06	4	2017-03-10	2017-03-14	6	68	67.6		1	2017-03-09	NCR	Quezon	1	10000-15000 PHP	Tertiary	0	0	0		0	0		1	1					Penicillines	Amoxicillin		0	0	1	0	1	1	0	0	0
510	0	1996-09-19	20	3	1	2017-03-09	2	0	2017-03-09	2017-02-28	10	2017-03-10	2017-03-16	8	0	68.1		1	2017-03-09	NCR	Manila	0	<5000 PHP	Tertiary	0	0	0		2	0		1	0	0							0	0	0	0	0	0	1	0	0
511	1	1997-01-28	20	3	0	2017-03-10	2	0	2017-03-10	2017-03-08	3	2017-03-13	2017-03-14	5	69	69.7		1	2017-03-10	NCR	Paranaque	1	<5000 PHP	Tertiary	0	0	0		0	0		1	1		2017-03-09	1	20:50:00				1	0	1	0	0	0	1	0	0
512	0	2009-03-03	8	2	1	2017-03-14	2	0	2017-03-14	2017-03-13	2	2017-03-15	2017-04-19	37	0	69.2		0		NCR	Pasay	1	5000-10000 PHP	Secondly	0	0	0		0	0		1	0	0							0	0	1	1	1	0	1	1	0
513	0	1963-03-03	54	3	1	2017-03-15	2	0	2017-03-15	2017-03-10	6	2017-03-15	2017-03-15	1	64.4	0		0		NCR	Manila	0	5000-10000 PHP	Tertiary	1	0	1	diabetes	0	0		1	0	0							0	1	1	0	1	1	1	1	0
514	0	1991-06-16	25	3	1	2017-03-15	2	0	2017-03-15	2017-03-12	4	2017-03-17	2017-03-18	4	68.3	67		0		NCR	Mandaluyong	1	5000-10000 PHP	Tertiary	0	0	0		2	1	3	1	1	3	2017-03-14	1	12:00:00	Unknown	Unknown	Pharmacy	1	0	0	0	0	1	0	0	0
515	0	1981-07-12	35	3	1	2017-03-16	2	0	2017-03-16	2017-03-09	8	2017-03-17	2017-03-31	16	66.8	65.4		1	2017-03-16	NCR	Valenzuela	1	10000-15000 PHP	Secondly	0	0	0		1	1	15	1	1	3				B-lactamase Inhibitors	Co-Amoxiclav	Pharmacy	1	0	1	0	0	0	0	0	0
516	0	1975-09-23	41	3	1	2017-03-16	2	0	2017-03-16	2017-03-09	8	2017-03-17	2017-03-25	10	65.8	67.1		1	2017-03-16	NCR	Manila	0	<5000 PHP	Primary	0	0	0		2	1	30	1	0	0							0	0	1	1	0	0	1	0	0
517	0	1991-11-16	25	3	1	2017-03-17	2	0	2017-03-17	2017-03-14	4	2017-03-18	2017-03-19	3	68.2	67.4		1	2017-03-17	NCR	Manila	0	<5000 PHP	Secondly	0	0	1	lung disease	2	0		1	0	0							0	0	1	1	0	0	1	1	0
518	0	1991-09-18	25	3	1	2017-03-17	2	0	2017-03-17	2017-03-15	3	2017-03-18	2017-03-19	3	68.8	66.7		1	2017-03-17	NCR	Manila	0	<5000 PHP	Tertiary	0	0	0		0	1	4	1	0	0							0	0	1	0	0	0	1	1	0
519	1	2012-11-10	4	1	1	2017-03-17	2	0	2017-03-17	2017-03-12	6	2017-03-19	2017-03-22	6	65.8	65.7		1	2017-03-17	NCR	Las Pinas	1	<5000 PHP	Secondly	0	0	0		0	0		1	1	2	2017-03-16	1	18:00:00	Unknown	Unknown	Public health center	1	0	0	0	0	0	1	0	0
520	0	1986-10-21	30	3	1	2017-03-22	2	0	2017-03-22	2017-03-15	8	2017-03-23	2017-03-26	5	0	68.9		1	2017-03-23	NCR	Quezon	1	<5000 PHP	Primary	0	0	0		0	0		1	0	0							0	0	1	0	0	0	1	1	1
521	1	2012-08-17	4	1	0	2017-03-24	2	0	2017-03-24	2017-03-21	4	2017-03-26	2017-03-27	4	68.1	64.5		1	2017-03-24	NCR	Caloocan	1	<5000 PHP	Tertiary	0	0	1	others	0	0		1	0	0							0	0	0	0	0	0	1	1	0
522	0	1992-08-22	24	3	1	2017-03-26	2	1	2017-03-27	2017-03-21	6	2017-03-27	2017-04-01	7	67.7	69.1		1	2017-03-27	NCR	Manila	0	<5000 PHP	Vocational	0	0	0		2	0		1	0	0							0	0	1	0	0	0	0	0	0
523	1	1981-01-29	36	3	1	2017-03-27	2	0	2017-03-27	2017-03-23	5	2017-03-28	2017-04-01	6	66.6	67		1	2017-03-27	NCR	Quezon	1	<5000 PHP	Primary	0	0	0		2	1	4	1	1	3	2017-03-25	2	22:00:00	Penicillines	Amoxicillin		0	0	0	0	1	0	0	0	0
524	0	1990-09-08	26	3	1	2017-03-28	2	0	2017-03-28	2017-03-21	8	2017-03-29	2017-04-01	5	70.1	66.1		1	2017-03-28	NCR	Quezon	1	<5000 PHP	Primary	0	0	0		0	0		1	0	0							0	0	1	0	0	0	1	0	0
525	0	1964-07-06	52	3	0	2017-03-28	2	1	2017-03-29	2017-03-27	2	2017-04-02	2017-04-11	15	0	0		0		Region 4		2	<5000 PHP	Secondly	0	0	0		0	0		1	0	0							0	0	1	0	0	0	1	1	0
526	0	1989-06-08	27	3	1	2017-03-29	2	1	2017-03-30	2017-03-25	5	2017-03-31	2017-04-03	6	0	0		0		NCR	Manila	0	10000-15000 PHP	Tertiary	0	0	0		2	0		1	1	2	2017-03-29	0	04:00:00	B-lactamase Inhibitors	Co-Amoxiclav	Private Clinic	1	0	1	0	0	1	1	0	0
527	0	2006-05-27	10	2	0	2017-04-03	2	0	2017-04-03	2017-03-29	6	2017-04-10	2017-04-11	9	66	61.7		1	2017-04-03	NCR	Caloocan	1	<5000 PHP	Secondly	0	0	0		0	0		1	1	4	2017-04-01	2	08:00:00	Penicillines	Amoxicillin	Other Hospital	1	0	1	0	0	0	1	1	0
528	0	1999-10-03	17	2	0	2017-04-05	2	0	2017-04-05	2017-04-01	5	2017-04-07	2017-04-11	7	68	67.1		1	2017-04-05	NCR	Las Pinas	1	<5000 PHP	Secondly	0	0	0		0	0		1	1	1	2017-04-05	0	04:00:00	B-lactamase Inhibitors	Co-Amoxiclav	Public health center	1	0	1	0	0	0	0	1	0
529	0	1998-10-10	18	3	1	2017-04-05	2	1	2017-04-06	2017-03-30	7	2017-04-07	2017-04-10	6	64.7	62.8		1	2017-04-06	NCR	Valenzuela	1	<5000 PHP	Secondly	0	0	0		2	0		0	0	0							0	0	1	0	1	1	1	1	1
530	1	2001-10-12	15	2	0	2017-04-06	2	0	2017-04-06	2017-04-03	4	2017-04-08	2017-04-10	5	68.2	66.5		1	2017-04-06	NCR	Manila	0	<5000 PHP	Secondly	0	0	0		0	0		1	0	0							0	0	1	0	0	0	0	0	0
531	1	2010-06-03	6	2	1	2017-04-07	2	0	2017-04-07	2017-04-02	6	2017-04-08	2017-04-09	3	64	64.8		1	2017-04-07	NCR	Paranaque	1	10000-15000 PHP	Vocational	0	0	0		0	0		1	0	0							0	0	0	0	0	0	1	0	0
532	0	1997-03-21	20	3	0	2017-04-17	2	0	2017-04-17	2017-04-07	11	2017-04-18	2017-04-22	6	0	67.1		1	2017-04-17	Region 4		2	<5000 PHP	Tertiary	0	0	0		0	0		1	0	0							0	0	0	0	0	1	0	0	0
533	1	1963-01-04	54	3	0	2017-04-18	2	0	2017-04-18	2017-04-15	4	2017-04-21	2017-04-23	6	67.5	68.2		1	2017-04-18	NCR	Manila	0	<5000 PHP	Tertiary	1	0	1	diabetes	0	0		1	1	1	2017-04-16	2	08:00:00	Unknown	Unknown	Other Hospital	1	0	1	1	0	0	1	0	0
534	1	2013-05-29	3	1	0	2017-04-19	2	0	2017-04-19	2017-04-15	5	2017-04-21	2017-04-21	3	63.9	0		0		NCR	Caloocan	1	10000-15000 PHP	Tertiary	0	0	0		0	0		1	0	0							0	0	1	0	0	0	1	1	0
535	0	1965-07-29	51	3	1	2017-04-18	2	1	2017-04-19	2017-04-18	1	2017-04-19	2017-04-19	2	0	0		1	2017-04-19	NCR	Quezon	1	<5000 PHP	Primary	0	0	1	heart disease	0	0		0	0	0							0	0	1	0	1	1	1	1	1
536	1	2006-08-28	10	2	1	2017-04-25	2	0	2017-04-25	2017-04-24	2	2017-04-26	2017-04-30	6	67.4	66.1		1	2017-04-26	NCR	Manila	0	<5000 PHP	Secondly	0	0	0		0	0		1	0	0							0	0	1	0	0	0	0	0	0
537	0	2000-10-30	16	2	0	2017-05-01	2	1	2017-05-02	2017-04-28	4	2017-05-04	2017-05-12	12	0	0		0		NCR	Caloocan	1	5000-10000 PHP	Primary	0	0	0		0	0		1	0	0							0	1	1	0	0	0	1	1	0
538	0	2001-06-07	15	2	0	2017-05-01	2	1	2017-05-02	2017-04-30	2	2017-05-02	2017-05-10	10	0	0		0		NCR	Taguig	1	10000-15000 PHP	Secondly	0	0	0		0	0		1	0	0							0	0	1	0	0	1	0	0	0
539	0	1980-04-30	37	3	0	2017-05-03	2	0	2017-05-03	2017-05-01	3	2017-05-04	2017-05-22	20	0	0		0		Region 3		2	10000-15000 PHP	Tertiary	0	0	0		0	0		1	0	0							0	0	0	0	0	1	1	0	0
540	1	1987-12-23	29	3	1	2017-05-04	2	0	2017-05-04	2017-04-30	5	2017-05-05	2017-05-08	5	68.1	66.2		1	2017-05-04	NCR	Manila	0	10000-15000 PHP	Tertiary	0	0	0		2	0		1	0	0							0	0	1	0	1	1	1	1	0
541	1	1993-10-28	23	3	1	2017-05-05	2	0	2017-05-05	2017-05-02	4	2017-05-07	2017-05-12	8	67.9	67.4		1	2017-05-05	NCR	Valenzuela	1	<5000 PHP	Secondly	0	0	0		2	1	4	1	0	0							0	0	1	0	1	1	1	0	0
542	0	1981-08-17	35	3	1	2017-05-08	2	1	2017-05-09	2017-05-01	8	2017-05-09	2017-05-18	11	0	0		0		NCR	Marikina	1	10000-15000 PHP	Primary	0	0	0		2	1	4	0	0	0							0	0	0	0	1	1	1	1	0
543	0	1998-02-13	19	3	0	2017-05-10	2	0	2017-05-10	2017-05-05	6	2017-05-13	2017-05-16	7	66.2	67.8		1	2017-05-11	NCR	Manila	0	5000-10000 PHP	Secondly	0	0	1	others	2	1	3	1	0	0							0	0	1	1	0	0	1	1	0
544	0	2011-09-03	5	2	0	2017-05-10	2	0	2017-05-10	2017-05-06	5	2017-05-11	2017-05-19	10	64.4	0		0		NCR	Navotas	1	<5000 PHP	Secondly	0	0	0		0	0		1	0	0							0	0	0	0	1	1	0	0	0
545	0	1954-05-08	63	3	1	2017-05-11	2	0	2017-05-11	2017-04-26	16	2017-05-12	2017-05-15	5	0	66.8		1	2017-05-12	NCR	Manila	0	10000-15000 PHP	Tertiary	1	0	1	diabetes;others	2	0		1	1	9	2017-05-11	0	08:00:00	Fluoroqunolones	Ciprofloxacin		0	0	0	0	0	0	0	0	0
546	0	1999-12-11	17	2	1	2017-05-11	2	0	2017-05-11	2017-04-24	18	2017-05-12	2017-05-16	6	0	0		1	2017-05-11	NCR	Pasay	1	<5000 PHP	Secondly	0	0	0		2	0		1	1	3	2017-05-10	1	20:00:00	Unknown	Unknown	Private Clinic	1	1	0	0	0	0	1	0	0
547	1	2000-12-30	16	2	1	2017-05-16	2	0	2017-05-16	2017-05-13	4	2017-05-17	2017-05-18	3	63.9	65.3		1	2017-05-16	NCR	Manila	0	10000-15000 PHP	Secondly	0	0	0		0	0		1	0	0							0	0	1	0	0	0	1	0	0
548	1	1996-01-13	21	3	1	2017-05-16	2	0	2017-05-16	2017-05-11	6	2017-05-17	2017-05-20	5	65.1	66.2		1	2017-05-16	NCR	Manila	0	<5000 PHP	Secondly	0	0	0		2	1	4	1	0	0							0	0	1	0	1	0	0	1	1
549	0	2002-03-25	15	2	0	2017-05-17	2	0	2017-05-17	2017-05-10	8	2017-05-18	2017-05-25	9	66.5	0		1	2017-05-17	NCR	Quezon	1	<5000 PHP	Primary	0	1	0		0	0		0	0	0							0	1	0	0	1	1	1	1	0
550	0	1989-07-21	27	3	1	2017-05-18	2	1	2017-05-19	2017-05-05	14	2017-05-19	2017-06-05	19	0	0		0		NCR	Pasay	1	<5000 PHP	Vocational	0	0	0		0	0		1	1	7	2017-05-10	8	08:00:00	Penicillines	Amoxicillin	Pharmacy	0	0	0	0	1	0	0	0	0
551	0	1997-11-18	19	3	1	2017-05-20	2	2	2017-05-22	2017-05-16	5	2017-05-21	2017-05-28	9	0	0		0		NCR	Quezon	1	<5000 PHP	Tertiary	0	0	1	others	0	1	4	0	0	0							0	1	1	0	1	1	1	1	0
552	0	1999-09-23	17	2	0	2017-05-20	2	2	2017-05-22	2017-05-18	3	2017-05-22	2017-05-25	6	0	0		0		NCR	Manila	0	<5000 PHP	Vocational	0	0	0		2	0		1	0	0							0	1	1	0	0	0	1	0	0
553	0	1998-09-07	18	3	1	2017-05-22	2	1	2017-05-23	2017-05-21	2	2017-05-30	2017-06-09	19	0	0		0		Region 4		2	<5000 PHP	Secondly	0	0	0		2	1	12	1	1	1	2017-05-22	0		Cephalosporines	Ceftriaxone	Other Hospital	1	1	1	1	1	1	0	1	0
554	0	1999-05-27	17	2	0	2017-05-23	2	0	2017-05-23	2017-05-22	2	2017-05-26	2017-05-31	9	0	0		0		NCR	Malabon	1	5000-10000 PHP	Secondly	0	0	0		0	0		1	1	1	2017-05-22	1	17:00:00	Penicillines	Amoxicillin	Other Hospital	1	1	1	1	0	0	0	0	0
555	0	1984-11-29	32	3	1	2017-05-23	2	0	2017-05-23	2017-05-18	6	2017-05-24	2017-05-28	6	66.9	68.2		1	2017-05-23	NCR	Manila	0	5000-10000 PHP	Primary	0	0	1	others	2	1	4	1	0	0							0	0	1	0	1	0	1	1	0
556	0	2014-11-22	2	1	1	2017-05-22	2	2	2017-05-24	2017-05-10	13	2017-05-24	2017-05-28	7	0	0		0		NCR	Manila	0	<5000 PHP	Secondly	1	0	0		0	0		1	0	0							0	0	0	0	1	1	1	1	0
557	1	2007-07-25	9	2	1	2017-05-24	2	0	2017-05-24	2017-05-23	2	2017-05-28	2017-05-31	8	66.4	64.8		0		NCR	Malabon	1	<5000 PHP	Secondly	0	0	0		0	0		1	0	0							0	0	1	0	1	1	0	0	0
558	1	2001-03-25	16	2	1	2017-05-25	2	0	2017-05-25	2017-05-22	4	2017-05-26	2017-05-30	6	66.1	64.9		1	2017-05-25	NCR	Manila	0	<5000 PHP	Secondly	0	0	0		0	0		1	0	0							0	0	1	0	1	1	0	0	0
560	0	1972-03-05	45	3	0	2017-05-27	2	2	2017-05-29	2017-05-25	3	2017-05-29	2017-06-02	7	0	0		0		NCR	Manila	0	<5000 PHP	Vocational	0	0	0		0	0		1	1	1	2017-05-25	2	20:00:00	Penicillines	Amoxicillin		0	1	0	0	1	1	0	0	0
561	1	1973-04-15	44	3	1	2017-05-30	2	0	2017-05-30	2017-05-27	4	2017-05-31	2017-06-06	8	66.3	66		1	2017-05-30	NCR	Manila	0	<5000 PHP	Secondly	0	0	0		2	1	4	1	0	0							0	0	0	0	1	1	1	1	0
562	1	2010-01-04	7	2	1	2017-05-31	2	0	2017-05-31	2017-05-27	5	2017-06-03	2017-06-11	12	66.8	64.9		1	2017-05-31	NCR	Manila	0	<5000 PHP	Primary	0	0	0		0	0		1	1	2	2017-05-30	1	20:00:00	Cephalosporines	Cefuroxime	Private Clinic	1	0	0	0	1	1	0	0	0
563	0	2013-09-23	3	1	1	2017-05-31	2	1	2017-06-01	2017-05-29	3	2017-06-04	2017-06-09	10	0	0		0		NCR	Quezon	1	5000-10000 PHP	Secondly	0	0	0		0	0		1	0	0							0	1	1	1	1	1	1	0	0
564	0	2013-04-07	4	1	0	2017-06-02	2	0	2017-06-02	2017-05-28	6	2017-06-05	2017-06-13	12	0	0		0		NCR	Valenzuela	1	5000-10000 PHP	Vocational	0	0	0		0	0		0	0	0							0	1	1	1	1	1	0	0	0
565	0	2001-10-25	15	2	0	2017-06-03	2	2	2017-06-05	2017-05-29	6	2017-06-04	2017-06-09	7	0	0		0		Region 4		2	<5000 PHP	Secondly	0	0	0		0	0		1	0	0							0	1	1	1	0	0	0	0	0
566	0	1990-11-27	26	3	1	2017-06-05	2	0	2017-06-05	2017-05-31	6	2017-06-07	2017-06-12	8	68.3	67.5		0		NCR	Manila	0	<5000 PHP	Tertiary	0	0	1	others	2	0		1	0	0							0	0	0	0	0	0	1	0	0
567	1	1996-02-08	21	3	0	2017-06-06	2	0	2017-06-06	2017-06-01	6	2017-06-07	2017-06-08	3	66.4	66.9		1	2017-06-06	NCR	Malabon	1	5000-10000 PHP	Secondly	0	0	0		2	0		1	0	0							0	0	1	0	1	1	0	0	0
568	1	1997-07-11	19	3	1	2017-06-06	2	1	2017-06-07	2017-06-02	5	2017-06-07	2017-06-11	6	67.5	66.9		1	2017-06-07	NCR	Manila	0	5000-10000 PHP	Secondly	0	0	0		0	0		1	0	0							0	0	0	0	1	1	1	0	0
569	0	2013-05-08	4	1	1	2017-06-07	2	1	2017-06-08	2017-06-06	2	2017-06-08	2017-06-12	6	0	0		0		Region 3		2	<5000 PHP	Primary	0	0	0		0	0		1	1	1	2017-06-07	0	19:30:00	Cephalosporines	ceftriaxone	Other Hospital	1	1	0	0	1	1	0	0	0
570	0	1995-04-12	22	3	0	2017-06-11	2	2	2017-06-13	2017-06-10	2	2017-06-13	2017-06-18	8	0	0		0		NCR	Quezon	1	5000-10000 PHP	Secondly	0	0	1	others	2	0		1	0	0							0	1	1	1	0	0	1	0	0
571	0	1988-08-01	28	3	0	2017-06-13	2	0	2017-06-13	2017-06-10	4	2017-06-15	2017-06-17	5	66.5	0		1	2017-06-13	NCR	Caloocan	1	5000-10000 PHP	Tertiary	0	0	0		0	0		1	0	0							0	0	0	0	0	0	0	0	0
572	1	2008-06-04	9	2	0	2017-06-13	2	0	2017-06-13	2017-06-09	5	2017-06-14	2017-06-18	6	67.4	66.1		1	2017-06-14	NCR	Malabon	1	<5000 PHP	Secondly	0	0	0		0	0		1	0	0							0	0	1	0	1	1	1	0	0
573	0	1977-10-16	39	3	1	2017-06-13	2	1	2017-06-14	2017-06-06	8	2017-06-14	2017-06-19	7	0	0		0		NCR	Manila	0	<5000 PHP	Tertiary	0	0	0		1	1	15	1	1	5	2017-06-09	4	08:00:00	Penicillines	Cloxacillin		1	0	0	0	1	0	0	0	0
574	0	1992-02-18	25	3	1	2017-06-13	2	1	2017-06-14	2017-06-06	8	2017-06-14	2017-06-19	7	0	0		0		NCR	Pasay	1	>20000 PHP	Secondly	0	0	0		2	1	4	1	1	4	2017-06-12	1	06:00:00	Unknown	Unknown		1	0	0	0	1	1	0	0	0
575	1	1998-11-10	18	3	0	2017-06-14	2	0	2017-06-14	2017-06-11	4	2017-06-16	2017-06-18	5	67.4	66.5		1	2017-06-14	NCR	Manila	0	<5000 PHP	Tertiary	0	0	0		0	0		1	0	0							0	0	1	0	1	1	0	1	0
576	0	1980-12-27	36	3	1	2017-06-15	2	0	2017-06-15	2017-06-08	8	2017-06-16	2017-06-22	8	0	0		1	2017-06-16	NCR	Caloocan	1	<5000 PHP	Secondly	0	0	0		0	0		1	0	0							0	0	1	0	0	0	0	0	0
577	0	1944-12-28	72	3	1	2017-06-15	2	0	2017-06-15	2017-06-11	5	2017-06-16	2017-06-21	7	65.2	67.2		1	2017-06-15	NCR	Manila	0	<5000 PHP	Secondly	1	0	1	diabetes;heart disease;others	0	0		1	0	0							0	0	1	0	0	0	0	0	0
578	0	2004-06-13	13	2	1	2017-06-15	2	1	2017-06-16	2017-06-09	7	2017-06-17	2017-06-19	5	67.3	66.3		1	2017-06-16	NCR	Manila	0	<5000 PHP	Secondly	0	0	0		0	0		1	0	0							0	0	0	0	0	0	1	1	0
579	0	2006-12-06	10	2	1	2017-06-16	2	0	2017-06-16	2017-06-05	12	2017-06-18	2017-06-19	4	66.6	0		1	2017-06-16	NCR	Manila	0	<5000 PHP	Secondly	0	0	0		0	0		1	0	0							0	0	0	0	0	0	1	0	0
580	0	2010-10-10	6	2	0	2017-06-16	2	0	2017-06-16	2017-06-09	8	2017-06-17	2017-06-20	5	0	0		1	2017-06-16	NCR	Manila	0	5000-10000 PHP	Secondly	0	0	0		0	0		1	1	5	2017-06-16	0	08:00:00	Cephalosporines	Cefixime	Private Clinic	1	0	1	0	1	1	1	0	0
581	0	1968-12-25	48	3	0	2017-06-17	2	2	2017-06-19	2017-06-12	6	2017-06-23	2017-06-28	12	0	0		0		Region 4		2	<5000 PHP	Primary	0	0	0		2	1	4	0	0	0							0	1	1	0	1	1	1	0	0
582	0	2007-01-27	10	2	1	2017-06-19	2	0	2017-06-19	2017-06-16	4	2017-06-21	2017-06-24	6	0	0		1	2017-06-19	NCR	Paranaque	1	5000-10000 PHP	Secondly	0	0	0		0	0		1	0	0							0	1	1	0	1	0	0	0	0
583	0	2000-10-09	16	2	1	2017-06-19	2	0	2017-06-19	2017-06-16	4	2017-06-22	2017-06-26	8	66	65.6		1	2017-06-19	NCR	Manila	0	<5000 PHP	Tertiary	0	0	0		0	0		1	1								0	1	0	0	1	0	0	0	0
584	0	1993-02-27	24	3	1	2017-06-19	2	0	2017-06-19	2017-06-14	6	2017-06-20	2017-06-27	9	0	64.3		0		NCR	Quezon	1	5000-10000 PHP	Tertiary	1	0	1	diabetes	0	0		1	0	0							0	1	0	0	1	1	1	1	0
585	1	2001-07-25	15	2	0	2017-06-21	2	0	2017-06-21	2017-06-18	4	2017-06-22	2017-06-24	4	67.1	66.1		1	2017-06-21	NCR	Caloocan	1	<5000 PHP	Secondly	0	0	0		0	0		1	0	0							0	0	1	0	1	1	0	0	0
586	0	2009-06-08	8	2	0	2017-06-21	2	0	2017-06-21	2017-06-19	3	2017-06-22	2017-06-24	4	0	0		0		NCR	Manila	0	5000-10000 PHP	Tertiary	0	0	0		0	0		1	0	0							0	1	1	0	0	1	0	0	0
587	0	1995-08-06	21	3	0	2017-06-21	2	0	2017-06-21	2017-06-18	4	2017-06-22	2017-06-29	9	0	65.9		0		NCR	Mandaluyong	1	<5000 PHP	Secondly	0	0	0		2	0		1	1	3	2017-06-21	0	08:00:00	B-lactamase Inhibitors	Co-Amoxiclav	Pharmacy	0	0	0	0	0	0	1	0	0
588	0	1992-10-03	24	3	0	2017-06-21	2	0	2017-06-21	2017-06-01	21	2017-06-22	2017-06-24	4	67.6	66.7		1	2017-06-21	NCR	Caloocan	1	<5000 PHP	Tertiary	0	0	0		0	0		1	1	7	2017-06-21	0	20:00:00	Fluoroqunolones	Floaxacillin	Public health center	1	0	0	0	1	1	0	0	0
589	1	2012-01-09	5	2	0	2017-06-21	2	1	2017-06-22	2017-06-08	14	2017-06-24	2017-06-28	8	0	0		0		NCR	Malabon	1	<5000 PHP	Secondly	0	0	0		0	0		1	1	4	2017-06-19	2	08:00:00	Co-trimo	Co-trimoxazole	Other Hospital	1	0	1	0	0	0	1	0	0
590	0	2014-06-19	3	1	0	2017-06-22	2	0	2017-06-22	2017-06-15	8	2017-06-23	2017-06-28	7	65.3	65		0		NCR	Caloocan	1	<5000 PHP	Secondly	0	0	0		0	0		1	0	0							0	1	0	0	0	0	1	0	0
591	0	1981-08-27	35	3	1	2017-06-24	2	0	2017-06-24	2017-06-18	7	2017-06-25	2017-07-12	19	0	0		0		Region 4		2	5000-10000 PHP	Tertiary	0	0	0		2	1	2	1	1	1	2017-06-23	1	19:00:00	Penicillines	Cloxacillin		1	0	1	0	1	1	1	0	0
592	0	2005-06-29	11	2	0	2017-06-26	2	1	2017-06-27	2017-06-23	4	2017-06-27	2017-07-25	30	0	0		0		NCR	Caloocan	1	5000-10000 PHP	Secondly	0	0	0		0	0		1	0	0							0	1	0	0	0	1	0	0	0
593	0	1992-10-31	24	3	1	2017-06-27	2	0	2017-06-27	2017-06-19	9	2017-06-28	2017-07-05	9	68.7	65.7		0		NCR	Manila	0	5000-10000 PHP	Tertiary	0	0	0		2	1	4	1	0	0							0	0	1	0	0	0	0	0	0
594	1	2004-10-28	12	2	1	2017-06-28	2	0	2017-06-28	2017-06-23	6	2017-06-29	2017-07-03	6	67.3	66.2		1	2017-06-28	NCR	Quezon	1	<5000 PHP	Secondly	0	0	0		0	0		1	1	2	2017-06-23	5	20:00:00	Co-trimo	Co-trimoxazole		0	0	1	0	1	0	1	1	0
595	0	2006-11-04	10	2	0	2017-06-29	2	1	2017-06-30	2017-06-25	5	2017-06-30	2017-07-02	4	0	0		0		NCR	Valenzuela	1	10000-15000 PHP	Secondly	0	0	0		0	0		1	1	2	2017-06-28	1	20:00:00	B-lactamase Inhibitors	Co-Amoxiclav	Public health center	1	1	1	0	0	0	1	1	0
596	0	2010-10-24	6	2	1	2017-06-30	2	0	2017-06-30	2017-06-25	6	2017-07-01	2017-07-04	5	64.6	64.1		1	2017-06-30	NCR	Manila	0	<5000 PHP	Secondly	0	0	0		0	0		1	0	0							0	0	1	0	0	0	1	0	0
597	1	1984-12-29	32	3	1	2017-07-03	3	1	2017-07-04	2017-06-29	5	2017-07-04	2017-07-08	6	67.9	66		1	2017-07-04	NCR	Manila	0	5000-10000 PHP	Secondly	0	0	0		2	1	4	1	0	0							0	0	1	0	1	1	1	1	0
598	1	2002-03-15	15	2	0	2017-07-04	3	0	2017-07-04	2017-06-30	5	2017-07-07	2017-07-08	5	68.8	0		1	2017-07-04	NCR	Valenzuela	1	<5000 PHP	Primary	0	0	0		0	0		1	0	0							0	1	1	0	1	1	1	0	0
599	0	1992-12-30	24	3	1	2017-07-06	3	0	2017-07-06	2017-07-01	6	2017-07-08	2017-07-18	13	66.2	64.9		0		CAR		2	5000-10000 PHP	Secondly	0	0	0		2	1	5	1	1	2	2017-07-05	1	05:00:00	B-lactamase Inhibitors	Co-Amoxiclav	Other Hospital	1	1	1	0	1	0	0	0	0
600	0	1986-07-14	30	3	1	2017-07-11	3	0	2017-07-11	2017-07-04	8	2017-07-12	2017-07-14	4	68.3	65.4		1	2017-07-11	NCR	Taguig	1	5000-10000 PHP	Primary	0	0	0		0	1	6	1	1	2	2017-07-10	1	17:00:00	Penicillines	Amoxicillin		0	0	1	0	1	0	1	1	0
601	1	2010-01-25	7	2	0	2017-07-11	3	0	2017-07-11	2017-07-08	4	2017-07-14	2017-07-16	6	66.5	66		0		NCR	Manila	0	<5000 PHP	Tertiary	0	0	0		0	0		1	0	0							0	0	1	0	0	0	0	0	0
602	0	2013-07-13	3	1	0	2017-07-12	3	0	2017-07-12	2017-07-07	6	2017-07-13	2017-07-17	6	67	0		1	2017-07-12	NCR	Quezon	1	<5000 PHP	Secondly	0	0	0		0	0		1	0	0							0	0	0	0	0	0	1	0	1
603	1	1999-03-10	18	3	1	2017-07-12	3	0	2017-07-12	2017-07-09	4	2017-07-13	2017-07-15	4	65.9	67.3		1	2017-07-12	NCR	Manila	0	<5000 PHP	Tertiary	0	0	0		0	0		1	0	0							0	0	0	0	0	0	1	1	0
604	0	2015-06-14	2	1	1	2017-07-13	3	0	2017-07-13	2017-07-09	5	2017-07-15	2017-07-19	7	65	0		0		NCR	Manila	0	<5000 PHP	Primary	0	0	1	others	0	0		1	0	0							0	0	1	0	0	0	1	0	0
605	0	1991-03-01	26	3	1	2017-07-13	3	0	2017-07-13	2017-06-30	14	2017-07-14	2017-07-19	7	67	65.1		0		NCR	Valenzuela	1	15000-20000 PHP	Tertiary	0	0	1	others	0	0		1	0	0							0	0	1	0	0	0	1	1	0
606	0	2008-02-25	9	2	0	2017-07-14	3	0	2017-07-14	2017-07-10	5	2017-07-15	2017-07-18	5	65.2	63.8		1	2017-07-14	NCR	Caloocan	1	<5000 PHP	Secondly	0	0	0		0	0		1	0	0							0	0	1	0	0	1	1	0	0
607	0	2013-04-06	4	1	1	2017-07-14	3	0	2017-07-14	2017-07-10	5	2017-07-16	2017-07-19	6	64.5	0		0		NCR	Manila	0	<5000 PHP	Tertiary	0	0	0		0	0		1	0	0							0	0	0	0	0	0	1	0	0
608	0	1989-02-02	28	3	1	2017-07-17	3	0	2017-07-17	2017-07-04	14	2017-07-18	2017-08-31	46	65.3	66.9		0		Region 4		2	<5000 PHP	Secondly	1	0	1	diabetes	2	0		1	1	7	2017-07-15	2	20:00:00	B-lactamase Inhibitors	Co-Amoxiclav	Public health center	1	0	0	0	0	0	0	0	0
609	0	1991-10-05	25	3	1	2017-07-18	3	0	2017-07-18	2017-07-08	11	2017-07-19	2017-07-26	9	67.3	65.7		0		NCR	Manila	0	<5000 PHP	Secondly	0	0	0		0	0		1	0	0							0	1	0	0	0	1	0	0	0
610	0	1991-08-30	25	3	1	2017-07-17	3	1	2017-07-18	2017-07-11	7	2017-07-18	2017-07-21	5	0	0		0		NCR	Manila	0	<5000 PHP	Tertiary	0	0	0		2	0		1	0	0							0	1	0	0	0	0	1	1	0
611	0	1979-09-07	37	3	1	2017-07-17	3	1	2017-07-18	2017-07-11	7	2017-07-18	2017-07-20	4	0	0		0		NCR	Malabon	1	10000-15000 PHP	Secondly	0	0	1	others	2	1	15	1	1		2017-07-14	3		Cephalosporines	Cephalexin	Other Hospital	1	1	0	0	1	1	0	0	0
612	1	1993-02-03	24	3	0	2017-07-18	3	0	2017-07-18	2017-07-11	8	2017-07-19	2017-07-22	5	67.4	65.8		1	2017-07-19	Region 4		2	<5000 PHP	Tertiary	0	0	0		0	0		1	0	0							0	0	1	0	1	1	1	1	0
613	0	1999-09-19	17	2	1	2017-07-18	3	0	2017-07-18	2017-07-13	6	2017-07-15	2017-07-19	2	0	0		0		NCR	Manila	0	<5000 PHP	Primary	0	0	0		2	1	4	1	0	0							0	1	1	0	0	0	0	0	0
614	1	2009-10-31	7	2	0	2017-07-19	3	0	2017-07-19	2017-07-14	6	2017-07-20	2017-07-22	4	63.5	66.9		1	2017-07-19	NCR	Manila	0	10000-15000 PHP	Tertiary	0	0	0		0	0		1	0	0							0	0	1	0	0	0	1	1	0
615	0	2015-02-24	2	1	1	2017-07-19	3	1	2017-07-20	2017-07-17	3	2017-07-20	2017-07-23	5	0	0		0		Region 3		2	10000-15000 PHP	Secondly	0	0	0		0	0		1	0	0							0	1	0	0	0	0	1	1	0
616	0	1988-05-19	29	3	1	2017-07-20	3	0	2017-07-20	2017-07-11	10	2017-07-21	2017-07-26	7	0	0		0		NCR	Caloocan	1	<5000 PHP	Secondly	0	0	0		2	0		1	0	0							0	0	0	0	1	1	0	0	0
617	0	2007-11-26	9	2	1	2017-07-20	3	0	2017-07-20	2017-07-17	4	2017-07-21	2017-07-25	6	66.6	64.9		1	2017-07-20	NCR	Pasay	1	<5000 PHP	Secondly	0	0	0		0	0		1	0	0							0	0	0	0	0	0	0	0	0
618	0	1957-05-24	60	3	0	2017-07-24	3	0	2017-07-24	2017-07-11	14	2017-07-26	2017-08-01	9	65.4	65.8		0		NCR	Taguig	1	<5000 PHP	Primary	0	0	0		0	0		1	1	6	2017-07-24	0	10:00:00	Lincomycines	Clindamycin	Private Clinic	1	0	0	0	0	0	0	0	0
619	0	2006-03-07	11	2	0	2017-07-24	3	0	2017-07-24	2017-07-21	4	2017-07-25	2017-07-28	5	66.5	67.9		1	2017-07-24	NCR	Manila	0	<5000 PHP	Tertiary	0	0	0		0	0		1	0	0							0	1	0	0	0	0	0	0	0
620	0	1992-06-01	25	3	0	2017-07-24	3	0	2017-07-24	2017-07-21	4	2017-07-26	2017-07-28	5	66.6	68.1		1	2017-07-24	NCR	Manila	0	<5000 PHP	Tertiary	0	0	0		2	0		1	0	0							0	0	1	0	0	1	0	0	0
621	0	2006-10-13	10	2	0	2017-07-24	3	1	2017-07-25	2017-07-18	7	2017-07-28	2017-08-11	19	0	67		0		Region 4		2	<5000 PHP	Primary	0	0	0		0	0		1	0	0							0	1	1	1	0	1	0	0	0
622	1	1992-07-26	24	3	1	2017-07-25	3	0	2017-07-25	2017-07-20	6	2017-07-26	2017-07-28	4	67.3	66		1	2017-07-25	NCR	Manila	0	<5000 PHP	Tertiary	0	0	0		0	0		1	0	0							0	0	1	0	1	0	1	0	0
623	1	2005-11-03	11	2	1	2017-07-25	3	0	2017-07-25	2017-07-20	6	2017-07-26	2017-07-28	4	65.4	64.3		1	2017-07-25	NCR	Malabon	1	<5000 PHP	Secondly	0	0	0		0	0		1	1	2	2017-07-25	0	07:00:00	Co-trimo	Co-trimoxazole		1	0	1	0	1	1	0	0	0
624	0	1969-02-25	48	3	1	2017-07-25	3	1	2017-07-26	2017-07-22	4	2017-07-25	2017-07-27	3	0	0		1	2017-07-26	NCR	Valenzuela	1	10000-15000 PHP	Tertiary	1	0	1	others	0	0		1	1	2	2017-07-25	0		B-lactamase Inhibitors	Co-Amoxiclav	Others	1	0	1	0	0	0	1	1	0
625	0	1995-09-13	21	3	0	2017-07-27	3	0	2017-07-27	2017-07-22	6	2017-07-29	2017-08-04	9	69.5	64.4		1	2017-07-27	NCR	Manila	0	<5000 PHP	Secondly	0	0	0		0	0		1	0	0							0	0	1	0	0	0	0	0	1
626	0	1955-02-25	62	3	1	2017-07-28	3	0	2017-07-28	2017-07-15	14	2017-07-29	2017-08-11	15	65	64.2		0		NCR	Malabon	1	<5000 PHP	Primary	0	0	1	others	0	0		1	0	0							0	0	0	0	0	0	1	1	0
627	0	2004-08-01	12	2	0	2017-07-28	3	0	2017-07-28	2017-07-25	4	2017-07-30	2017-08-04	8	66.2	66.9		1	2017-07-28	NCR	Quezon	1	<5000 PHP	Secondly	0	0	0		0	0		1	0	0							0	0	1	0	1	0	1	0	0
628	0	1998-10-13	18	3	1	2017-07-31	3	0	2017-07-31	2017-07-28	4	2017-08-01	2017-08-07	8	66.9	65.9		1	2017-07-31	NCR	Pasig	1	<5000 PHP	Vocational	0	0	0		2	1	4	1	0	0							0	0	1	0	1	1	1	1	0
629	0	2002-01-22	15	2	1	2017-07-31	3	0	2017-07-31	2017-07-27	5	2017-08-01	2017-08-03	4	67.4	68.3		0		Region 4		2	<5000 PHP	Secondly	0	0	0		0	0		1	1	3	2017-07-30	1	08:00:00	Penicillines	Amoxicillin		0	1	1	0	0	0	0	0	0
630	0	1995-12-29	21	3	0	2017-08-01	3	0	2017-08-01	2017-08-01	1	2017-08-02	2017-08-08	8	70	68		0		NCR	Quezon	1	<5000 PHP	Tertiary	0	0	0		0	0		0	0	0							0	1	1	0	0	0	1	0	0
631	0	1984-03-24	33	3	1	2017-08-01	3	0	2017-08-01	2017-07-19	14	2017-08-02	2017-08-14	14	0	71.7		0	2017-08-01	NCR	Caloocan	1	<5000 PHP	Secondly	0	0	0		2	0		1	1		2017-07-26	6		Penicillines	Amoxicillin		0	0	1	1	0	0	1	1	0
632	1	2008-06-14	9	2	1	2017-08-01	3	0	2017-08-01	2017-07-28	5	2017-08-02	2017-08-04	4	68.8	68.2		1	2017-08-01	NCR	Malabon	1	<5000 PHP	Secondly	0	0	0		0	0		1	1	4	2017-08-01	0	08:00:00	Cephalosporines	Cephalexin		0	0	1	0	1	1	1	0	0
633	0	1983-04-07	34	3	1	2017-08-01	3	0	2017-08-01	2017-07-12	21	2017-08-02	2017-08-08	8	69.1	68.6		1	2017-08-01	NCR	Manila	0	<5000 PHP	Primary	0	0	0		2	0		1	1	8	2017-07-25	7		Macrolides	Azithromycin	Public health center	1	1	1	0	0	0	1	1	0
634	0	2005-09-09	11	2	0	2017-08-01	3	0	2017-08-01	2017-07-31	2	2017-08-03	2017-08-06	6	69	68.9		1	2017-08-01	NCR	Manila	0	<5000 PHP	Tertiary	0	0	0		0	0		1	0	0							0	0	1	0	0	0	0	0	0
635	1	1984-12-22	32	3	1	2017-08-02	3	0	2017-08-02	2017-07-31	3	2017-08-03	2017-08-05	4	67.3	66.1		1	2017-08-02	NCR	Caloocan	1	<5000 PHP	Secondly	0	0	0		2	1	4	1	0	0							0	0	1	0	1	1	0	0	0
636	0	2014-06-04	3	1	1	2017-08-02	3	0	2017-08-02	2017-07-27	7	2017-08-04	2017-08-07	6	65.6			0		NCR	Manila	0	5000-10000 PHP	Tertiary	0	0	0		0	0		1	0	0							0	0	0	0	0	0	1	0	0
637	0	2011-12-08	5	2	1	2017-08-02	3	0	2017-08-02	2017-07-26	8	2017-10-18	2017-10-18	78	0	65.1		1	2017-08-02	NCR	Manila	0	<5000 PHP	Secondly	0	0	0		0	0		1	0	0							0	0	0	0	0	0	0	0	0
638	0	2001-09-18	15	2	0	2017-08-02	3	0	2017-08-02	2017-07-24	10	2017-08-04	2017-08-07	6	0	68.8		1	2017-08-02	Region 4		2	<5000 PHP	Secondly	0	0	0		0	0		1	1	7	2017-08-01	1	20:00:00	Co-trimo	Co-trimoxazole	Public health center	1	0	0	0	0	0	1	0	0
639	0	2002-06-03	15	2	0	2017-08-03	3	0	2017-08-03	2017-07-28	7	2017-08-04	2017-08-05	3	67.6	65.7		0		NCR	Valenzuela	1	<5000 PHP	Secondly	0	0	0		0	0		1	0	0							0	0	1	0	0	1	0	0	1
640	0	1983-11-09	33	3	0	2017-08-03	3	0	2017-08-03	2017-07-28	7	2017-08-04	2017-08-05	3	68.3	70.9		0		NCR	Manila	0	<5000 PHP	Secondly	0	0	0		0	0		1	0	0							0	0	1	0	1	1	0	0	0
641	0	2011-09-25	5	2	1	2017-08-04	3	0	2017-08-04	2017-07-30	6	2017-08-08	2017-08-11	8	0	0		0		NCR	Valenzuela	1	<5000 PHP	Tertiary	0	0	0		0	0		1	0	0							0	1	0	0	1	1	0	0	0
642	0	1994-12-20	22	3	1	2017-08-06	3	1	2017-08-07	2017-07-31	7	2017-08-07	2017-08-11	6	69.3	67.5		1	2017-08-07	NCR	Malabon	1	<5000 PHP	Secondly	0	0	0		2	1	4	1	0	0							0	1	1	1	1	1	1	0	0
643	0	1966-07-07	51	3	1	2017-08-06	3	1	2017-08-07	2017-07-29	9	2017-08-07	2017-08-08	3	0	0		0		NCR	Caloocan	1	10000-15000 PHP	Primary	0	0	0		2	1	4	1	0	0							0	0	1	1	0	0	1	0	0
644	0	1992-10-24	24	3	0	2017-08-07	3	0	2017-08-07	2017-08-04	4	2017-08-09	2017-08-15	9	68.5	68.2		1	2017-08-07	NCR	Caloocan	1	<5000 PHP	Vocational	0	0	1	others	0	0		1	1	1	2017-08-06	1	21:00:00	B-lactamase Inhibitors	Co-Amoxiclav		0	0	1	0	0	0	1	1	0
645	1	2012-09-18	4	1	1	2017-08-08	3	0	2017-08-08	2017-08-03	6	2017-08-09	2017-08-11	4	0	0		0		NCR	Manila	0	<5000 PHP	Tertiary	0	0	0		0	0		1	1	5	2017-08-07	1	20:30:00	B-lactamase Inhibitors	Co-Amoxiclav	Other Hospital	1	0	1	0	0	0	1	0	0
646	0	2013-07-22	4	1	1	2017-08-08	3	0	2017-08-08	2017-08-04	5	2017-08-11	2017-08-12	5	65.1	65.5		0		NCR	Caloocan	1	5000-10000 PHP	Secondly	0	0	1	others	0	0		1	0	0							0	0	0	0	0	1	1	0	0
647	1	1981-09-03	35	3	1	2017-08-08	3	0	2017-08-08	2017-08-05	4	2017-08-09	2017-08-10	3	68.7	68.1		0		NCR	Caloocan	1	<5000 PHP	Secondly	0	0	0		2	0		1	0	0							0	0	1	0	0	1	0	0	0
648	0	1983-07-22	34	3	1	2017-08-09	3	0	2017-08-09	2017-08-06	4	2017-08-10	2017-08-13	5	65.4	67.7		1	2017-08-09	Region 5		2	<5000 PHP	Secondly	0	0	0		0	0		1	0	0							0	0	1	0	0	0	0	1	0
649	0	2003-09-22	13	2	1	2017-08-09	3	0	2017-08-09	2017-08-07	3	2017-08-10	2017-08-12	4	67.7	69.2		0		NCR	Manila	0	<5000 PHP	Secondly	0	0	0		0	0		1	0	0							0	1	0	0	0	0	0	0	0
650	0	1978-04-11	39	3	0	2017-08-10	3	0	2017-08-10	2017-08-07	4	2017-08-14	2017-08-17	8	66.1	66.8		1	2017-08-10	NCR	Manila	0	<5000 PHP	Tertiary	0	0	1	others	0	0		1	1	1	2017-08-10	0	08:00:00	Cephalosporines	cefexime	Private Clinic	1	0	1	0	0	0	0	0	0
651	0	2011-06-24	6	2	0	2017-08-11	3	0	2017-08-11	2017-08-02	10	2017-08-12	2017-08-18	8	0	0		0		NCR	Quezon	1	5000-10000 PHP	Secondly	0	0	0		0	0		1	1	4	2017-08-11	0		Macrolides	Clarithromycin		1	0	1	0	0	0	0	0	0
652	0	2012-03-29	5	2	1	2017-08-12	3	2	2017-08-14	2017-08-11	2	2017-08-13	2017-08-17	6	0	0		0		Region 3		2	10000-15000 PHP	Tertiary	1	0	0		0	0		1	0	0							0	1	1	1	0	1	0	0	0
653	0	2010-12-03	6	2	1	2017-08-14	3	0	2017-08-14	2017-08-09	6	2017-08-15	2017-08-19	6	65.3	0		1	2017-08-14	NCR	Manila	0	5000-10000 PHP	Tertiary	0	0	0		0	0		1	0	0							0	0	1	0	0	0	1	0	0
654	0	1996-02-01	21	3	1	2017-08-14	3	1	2017-08-15	2017-08-11	4	2017-08-16	2017-08-19	6	0	67.8		1	2017-08-15	NCR	Quezon	1	<5000 PHP	Secondly	0	0	0		2	1	10	1	0	0							0	0	1	1	0	0	1	1	0
655	0	2015-12-30	1	1	0	2017-08-15	3	0	2017-08-15	2017-08-11	5	2017-08-16	2017-08-21	7	68.7	67.3		0		NCR	Marikina	1	10000-15000 PHP	Tertiary	0	0	0		0	0		1	1	1	2017-08-14	1		Cephalosporines	Cefuroxime	Other Hospital	1	1	1	0	0	0	0	1	0
656	1	2008-01-29	9	2	1	2017-08-15	3	0	2017-08-15	2017-08-14	2	2017-08-16	2017-08-22	8	68.3	68.3		1	2017-08-15	NCR	Quezon	1	<5000 PHP	Secondly	0	0	1	others	0	0		1	0	0							0	0	1	0	1	1	0	0	0
657	1	1993-08-10	24	3	1	2017-08-15	3	0	2017-08-15	2017-08-10	6	2017-08-16	2017-08-19	5	67.7	66.8		0		Region 4		2	<5000 PHP	Primary	0	0	0		2	0		1	0	0							0	1	1	0	1	1	1	0	0
658	0	1998-04-04	19	3	1	2017-08-16	3	0	2017-08-16	2017-08-01	16	2017-08-24	2017-08-30	15	71.7	70		0		Region 4		2	<5000 PHP	Tertiary	0	0	0		0	0		1	1	4	2017-08-15	1	08:00:00	B-lactamase Inhibitors	Co-Amoxiclav	Private Clinic	1	1	1	0	0	0	0	0	0
659	0	1996-05-02	21	3	1	2017-08-16	3	0	2017-08-16	2017-08-13	4	2017-08-17	2017-08-21	6	67.3	67.7		1	2017-08-16	NCR	Manila	0	<5000 PHP	Secondly	0	0	0		2	1	9	1	1	1	2017-08-16	0	07:00:00	Fluoroqunolones	Ciprofloxacin		0	1	1	0	0	0	0	0	0
660	0	1995-04-06	22	3	1	2017-08-16	3	0	2017-08-16	2017-08-13	4	2017-08-17	2017-08-19	4	68	67.5		0		NCR	Quezon	1	<5000 PHP	Primary	0	0	0		0	0		1	0	0							0	0	1	0	1	1	0	0	0
661	0	1992-08-25	24	3	1	2017-08-17	3	0	2017-08-17	2017-08-12	6	2017-08-18	2017-08-21	5	67.1	67.3		0		NCR	Quezon	1	<5000 PHP	Primary	0	0	0		2	0		1	0	0							0	0	1	0	0	0	0	0	0
662	0	2010-09-06	6	2	1	2017-08-17	3	0	2017-08-17	2017-08-10	8	2017-08-18	2017-08-22	6	67.6	66		0		NCR	Caloocan	1	<5000 PHP	Tertiary	0	0	0		0	0		1	1	6	2017-08-10	7		Cephalosporines	Cephalexin		0	0	1	0	0	0	0	0	0
663	0	1961-12-27	55	3	0	2017-08-18	3	0	2017-08-18	2017-08-16	3	2017-08-19	2017-08-21	4	67	67.3		0		NCR	Caloocan	1	<5000 PHP	Secondly	1	0	1	diabetes	0	0		1	0	0							0	0	1	0	0	0	1	1	0
664	0	1994-01-29	23	3	1	2017-08-18	3	0	2017-08-18	2017-08-14	5	2017-08-19	2017-08-24	7	67.1	67		0		Region 4		2	<5000 PHP	Tertiary	0	0	0		2	1	3	1	0	0							0	1	1	0	1	0	0	0	0
665	0	1998-04-15	19	3	1	2017-08-18	3	0	2017-08-18	2017-08-15	4	2017-08-19	2017-08-24	7	67.5	67.5		1	2017-08-18	NCR	Manila	0	<5000 PHP	Vocational	0	0	1	others	2	1	3	1	0	0							0	0	1	0	0	0	0	0	0
666	0	1978-10-10	38	3	1	2017-08-22	3	0	2017-08-22	2017-08-12	11	2017-08-25	2017-09-20	30	67.5	67.2		1	2017-08-22	NCR	Manila	0	<5000 PHP	Secondly	0	0	0		2	1	6	1	1	4	2017-08-22	0	07:30:00	Penicillines	Amoxicillin		0	0	1	0	1	0	0	0	0
667	0	2006-09-03	10	2	0	2017-08-23	3	0	2017-08-23	2017-08-20	4	2017-08-24	2017-08-29	7	71.1	68.4		0		NCR	Quezon	1	5000-10000 PHP	Primary	0	0	0		0	0		1	0	0							0	0	0	0	0	0	1	1	0
668	1	1995-02-18	22	3	1	2017-08-23	3	0	2017-08-23	2017-08-21	3	2017-08-24	2017-08-27	5	69.3	68.7		0		NCR	Manila	0	<5000 PHP	Secondly	0	0	0		2	1	15	1	0	0							0	0	1	0	0	0	0	0	0
669	0	1983-07-20	34	3	0	2017-08-23	3	0	2017-08-23	2017-08-10	14	2017-08-24	2017-08-27	5	67.3	67		1	2017-08-23	NCR	Manila	0	<5000 PHP	Secondly	0	0	1	others	0	0		1	1					Fluoroqunolones	Ciprofloxacin	Other Hospital	1	0	1	0	0	0	0	0	0
670	1	2003-06-19	14	2	0	2017-08-23	3	0	2017-08-23	2017-08-17	7	2017-08-24	2017-08-26	4	68.4	65.8		1	2017-08-23	Region 4		2	<5000 PHP	Tertiary	0	0	0		0	0		1	0	0							0	1	1	0	1	1	0	1	0
671	0	1972-07-23	45	3	0	2017-08-23	3	1	2017-08-24	2017-08-19	5	2017-08-24	2017-09-02	11	0	0		0		Region 3		2	<5000 PHP	Secondly	0	0	0		0	0		1	1		2017-08-23	0		Cephalosporines	Ceftriaxone	Other Hospital	1	1	1	1	1	1	1	1	0
672	0	2004-11-06	12	2	1	2017-08-24	3	0	2017-08-24	2017-08-23	2	2017-08-25	2017-08-27	4	67.7	67.9		1	2017-08-24	NCR	Manila	0	<5000 PHP	Secondly	0	0	0		0	0		1	0	0							0	0	1	0	0	0	1	0	0
673	0	1981-08-26	35	3	1	2017-08-24	3	0	2017-08-24	2017-08-20	5	2017-08-25	2017-08-28	5	67.4	67.7		0		NCR	Valenzuela	1	5000-10000 PHP	Secondly	0	0	1	others	2	1	6	1	0	0							0	0	1	0	1	1	1	0	0
674	0	1984-12-09	32	3	0	2017-08-24	3	0	2017-08-24	2017-08-22	3	2017-08-25	2017-08-27	4	67.1	67.5		0		NCR	Manila	0	<5000 PHP	Secondly	0	0	0		0	1	15	1	0	0							0	0	1	0	0	0	0	1	0
675	0	1996-05-05	21	3	1	2017-08-29	3	0	2017-08-29	2017-08-24	6	2017-08-30	2017-09-01	4	67.8	67.2		1	2017-08-29	NCR	Caloocan	1	5000-10000 PHP	Secondly	0	0	0		2	1	4	1	0	0							0	0	1	0	1	1	1	1	0
676	1	1994-08-23	23	3	1	2017-08-29	3	0	2017-08-29	2017-08-24	6	2017-08-30	2017-09-02	5	66.6	67		0		NCR	Malabon	1	15000-20000 PHP	Vocational	0	0	0		0	1	4	1	0	0							0	0	1	0	1	1	0	0	0
677	1	1986-05-19	31	3	1	2017-08-29	3	0	2017-08-29	2017-08-24	6	2017-08-30	2017-09-05	8	67.1	68.6		1	2017-08-30	NCR	Malabon	1	<5000 PHP	Secondly	0	0	0		2	1	15	1	0	0							0	1	0	0	1	1	1	0	0
678	0	1988-11-23	28	3	1	2017-08-30	3	0	2017-08-30	2017-08-27	4	2017-08-31	2017-09-03	5	67.5	67.3		1	2017-08-30	NCR	Malabon	1	<5000 PHP	Primary	0	0	0		0	0		1	0	0							0	0	1	0	1	0	0	0	0
679	0	1964-10-20	52	3	1	2017-08-30	3	0	2017-08-30	2017-08-17	14	2017-08-31	2017-09-11	13	67.2	67.4		0		Region 4		2	5000-10000 PHP	Secondly	0	0	1	others	2	1	3	1	1	3	2017-08-25	5	09:00:00	Cephalosporines	Cephalexin	Public health center	1	1	1	0	0	0	1	1	0
680	0	1980-09-13	36	3	0	2017-08-31	3	0	2017-08-31	2017-08-26	6	2017-09-01	2017-09-06	7	67.1	67.4		1	2017-08-31	NCR	Manila	0	<5000 PHP	Secondly	0	0	1	others	0	0		1	0	0							0	0	1	0	0	0	0	1	0
681	0	2004-01-25	13	2	0	2017-08-31	3	0	2017-08-31	2017-08-27	5	2017-08-31	2017-09-05	6	67.5	67.7		0		NCR	Caloocan	1	<5000 PHP	Secondly	0	0	1	others	0	0		1	0	0							0	0	1	0	1	1	1	1	0
682	0	1994-04-01	23	3	1	2017-09-03	3	1	2017-09-04	2017-09-01	3	2017-09-04	2017-09-09	7	0	0		0		NCR	Quezon	1	<5000 PHP	Primary	0	0	0		2	1	3	1	0	0							0	0	1	0	0	0	0	0	0
683	0	2013-01-24	4	1	1	2017-09-04	3	0	2017-09-04	2017-08-31	5	2017-09-05	2017-09-16	13	0	0		0		Region 4		2	10000-15000 PHP	Secondly	0	0	0		0	0		1	1		2017-09-03	1		Unknown	Unknown	Other Hospital	1	0	0	0	0	0	1	1	0
684	0	1964-09-25	52	3	1	2017-09-04	3	0	2017-09-04	2017-08-31	5	2017-09-05	2017-09-15	12	67.7	67.4		0		NCR	Manila	0	<5000 PHP	Vocational	1	0	1	diabetes;heart disease	0	0		1	0	0							0	0	0	0	0	0	1	1	0
685	1	1996-01-18	21	3	0	2017-09-05	3	0	2017-09-05	2017-08-31	6	2017-09-07	2017-09-07	3	67.2	67.4		0		NCR	Manila	0	<5000 PHP	Tertiary	0	0	1	others	2	0		1	0	0							0	1	1	0	1	1	1	1	0
686	1	1992-12-25	24	3	0	2017-09-05	3	0	2017-09-05	2017-08-31	6	2017-09-06	2017-09-08	4	67.5	67.1		0		NCR	Makati	1	<5000 PHP	Tertiary	0	0	1	others	0	0		1	0	0							0	0	1	0	1	1	1	1	0
687	0	2006-09-08	10	2	1	2017-09-06	3	0	2017-09-06	2017-09-03	4	2017-09-09	2017-09-13	8	67.8	67.1		0		NCR	Quezon	1	<5000 PHP	Secondly	0	0	1	others	0	0		1	1	2	2017-09-06	0	05:00:00	Penicillines	Amoxicillin	Public health center	1	0	1	0	0	0	1	1	0
688	0	1992-08-16	25	3	1	2017-09-06	3	0	2017-09-06	2017-09-04	3	2017-09-07	2017-09-09	4	0	67.6		0		NCR	Valenzuela	1	<5000 PHP	Tertiary	0	0	1	others	2	1	10	1	1	1	2017-09-05	1	17:00:00	Macrolides	Erythromycin		0	0	0	0	0	0	0	0	0
689	1	2002-09-25	14	2	1	2017-09-06	3	0	2017-09-06	2017-09-02	5	2017-09-07	2017-09-09	4	67.4	67.7		1	2017-09-07	NCR	Quezon	1	<5000 PHP	Secondly	0	0	0		0	0		1	0	0							0	0	1	0	1	1	0	0	0
690	0	1996-05-12	21	3	1	2017-09-07	3	0	2017-09-07	2017-08-30	9	2017-09-08	2017-09-10	4	67.2	67.6		0		NCR	Quezon	1	<5000 PHP	Secondly	0	0	0		2	0		1	1	4	2017-09-07	0	04:00:00	Co-trimo	Co-trimoxazole	Private Clinic	1	0	0	0	0	0	0	0	1
691	1	1998-07-24	19	3	1	2017-09-07	3	0	2017-09-07	2017-09-01	7	2017-09-08	2017-09-11	5	67.3	66.3		0		NCR	Quezon	1	<5000 PHP	Primary	0	0	0		0	1	6	1	0	0							0	0	0	0	1	1	1	0	0
692	0	1973-05-19	44	3	0	2017-09-08	3	0	2017-09-08	2017-09-01	8	2017-09-09	2017-09-12	5	67.8	67.8		0		NCR	Manila	0	<5000 PHP	Secondly	0	0	1	others	2	1	15	1	1	7	2017-09-08	0	04:00:00	Fluoroqunolones	Floaxacillin	Others	1	0	0	0	1	0	1	0	0
693	0	2004-10-29	12	2	1	2017-09-09	3	2	2017-09-11	2017-09-03	7	2017-09-10	2017-09-15	7	0	70.3		1	2017-09-11	NCR	Quezon	1	<5000 PHP	Secondly	0	0	0		0	0		1	0	0							0	1	1	0	0	0	0	0	0
694	0	1966-12-29	50	3	1	2017-09-11	3	0	2017-09-11	2017-09-05	7	2017-09-12	2017-09-19	9	70.3	68		1	2017-09-11	NCR	Caloocan	1	<5000 PHP	Secondly	0	0	0		2	1	1	1	0	0							0	1	1	0	1	1	1	1	0
695	0	2011-06-01	6	2	1	2017-09-13	3	0	2017-09-13	2017-09-13	1	2017-09-14	2017-09-18	6	68	68.8		1	2017-09-14	NCR	Caloocan	1	<5000 PHP	Primary	0	0	1	others	0	0		1	0	0							0	0	0	0	0	0	1	1	0
696	0	1973-08-26	44	3	0	2017-09-13	3	0	2017-09-13	2017-09-07	7	2017-09-14	2017-09-17	5	68.9	68.5		1	2017-09-14	NCR	Quezon	1	<5000 PHP	Secondly	0	0	0		0	0		1	0	0							0	0	1	0	1	1	0	0	0
697	1	2012-09-05	5	2	0	2017-09-13	3	0	2017-09-13	2017-09-07	7	2017-09-14	2017-09-15	3	68.3	67		1	2017-09-14	NCR	Manila	0	15000-20000 PHP	Tertiary	1	0	1	others	0	0		1	0	0							0	0	0	0	0	0	1	0	0
698	1	1969-11-22	47	3	0	2017-09-13	3	0	2017-09-13	2017-09-11	3	2017-09-14	2017-09-16	4	66.7	66.9		1	2017-09-14	NCR	Manila	0	<5000 PHP	Secondly	0	0	0		0	0		1	0	0							0	0	1	0	1	1	0	0	0
699	0	2000-11-09	16	2	1	2017-09-14	3	0	2017-09-14	2017-09-09	6	2017-09-15	2017-09-19	6	67.7	67		1	2017-09-14	NCR	Taguig	1	<5000 PHP	Vocational	0	0	0		0	0		1	1	4	2017-09-14	0	03:00:00	Cephalosporines	Cefepime	Private Clinic	1	0	1	0	0	1	0	0	0
700	0	1972-08-19	45	3	1	2017-09-14	3	0	2017-09-14	2017-09-04	11	2017-09-15	2017-09-24	11	67.5	68.1		1	2017-09-15	NCR	Manila	0	<5000 PHP	Primary	0	0	0		0	0		1	0	0							0	0	0	0	0	0	1	0	1
701	0	1995-01-10	22	3	0	2017-09-15	3	0	2017-09-15	2017-09-09	7	2017-09-16	2017-09-20	6	67.2	0		0		NCR	Taguig	1	<5000 PHP	Tertiary	0	0	0		0	0		1	1	1				Unknown	Unknown	Private Clinic	1	0	1	0	1	1	0	1	0
702	0	2000-08-16	17	2	1	2017-09-15	3	0	2017-09-15	2017-09-09	7	2017-09-17	2017-09-24	10	69.7	68.4		0		NCR	Paranaque	1	<5000 PHP	Secondly	0	0	0		1	1	6	1	0	0							0	1	0	0	0	0	1	1	0
703	0	1984-10-14	32	3	1	2017-09-18	3	0	2017-09-18	2017-09-14	5	2017-09-19	2017-09-21	4	68.4	69.6		1	2017-09-18	NCR	Manila	0	5000-10000 PHP	Secondly	0	0	0		0	0		1	0	0							0	0	1	0	0	0	1	0	0
704	0	1987-04-19	30	3	0	2017-09-18	3	0	2017-09-18	2017-09-14	5	2017-09-19	2017-09-21	4	0	0		1	2017-09-18	NCR	Caloocan	1	5000-10000 PHP	Tertiary	0	0	0		2	0		1	1	2	2017-09-18	0	08:00:00	Cephalosporines	Cefuroxime	Private Clinic	1	1	1	1	0	0	0	0	0
705	0	2000-08-23	17	2	0	2017-09-19	3	0	2017-09-19	2017-09-10	10	2017-09-21	2017-10-05	17	0	0		0		Region 3		2	5000-10000 PHP	Secondly	0	0	0		0	0		1	0	0							0	1	0	0	1	1	0	1	0
706	1	2009-02-03	8	2	0	2017-09-19	3	0	2017-09-19	2017-09-16	4	2017-09-20	2017-09-23	5	66.1	66.1		1	2017-09-19	NCR	Manila	0	<5000 PHP	Secondly	0	0	0		0	0		1	1	1	2017-09-18	1		Penicillines	Amoxicillin	Public health center	0	1	1	0	0	0	0	1	0
707	1	1998-05-01	19	3	1	2017-09-19	3	0	2017-09-19	2017-09-09	11	2017-09-20	2017-09-21	3	67.9	67.3		1	2017-09-19	NCR	Quezon	1	<5000 PHP	Primary	0	0	0		0	0		1	0	0							0	1	1	0	1	1	1	0	0
708	0	2003-11-21	13	2	1	2017-09-20	3	0	2017-09-20	2017-09-17	4	2017-09-21	2017-09-24	5	68.8	67.6		1	2017-09-20	NCR	Paranaque	1	<5000 PHP	Secondly	0	0	0		0	0		1	0	0							0	0	0	0	0	0	0	1	0
709	0	1995-07-25	22	3	0	2017-09-22	3	0	2017-09-22	2017-09-16	7	2017-09-23	2017-09-26	5	68.9	68.9		1	2017-09-22	NCR	Caloocan	1	5000-10000 PHP	Tertiary	0	0	0		2	0		1	1	2	2017-09-21	1	20:00:00	Penicillines	Amoxicillin		0	0	0	0	1	0	0	0	0
710	0	2006-06-09	11	2	1	2017-09-22	3	0	2017-09-22	2017-09-19	4	2017-09-23	2017-09-26	5	0	0		1	2017-09-22	NCR	Quezon	1	5000-10000 PHP	Secondly	0	0	0		0	0		1	1	1	2017-09-20	2	19:00:00	Macrolides	Clarithromycin		0	0	1	1	1	1	1	0	0
711	0	2009-04-12	8	2	1	2017-09-25	3	0	2017-09-25	2017-09-18	8	2017-09-26	2017-09-30	6	0	67.4		1	2017-09-26	NCR	Manila	0	<5000 PHP	Secondly	0	0	0		0	0		1	0	0							0	0	1	0	0	0	1	1	0
712	0	1976-04-09	41	3	0	2017-09-25	3	0	2017-09-25	2017-09-11	15	2017-09-26	2017-09-30	6	0	69.3		1	2017-09-25	NCR	Malabon	1	<5000 PHP	Secondly	1	0	1	others	0	0		1	0	0							0	0	1	0	1	1	1	0	0
713	0	1988-11-24	28	3	1	2017-09-26	3	0	2017-09-26	2017-09-21	6	2017-09-27	2017-10-02	7	68.8	0		1	2017-09-26	NCR	Las Pinas	1	<5000 PHP	Primary	0	0	0		0	1	15	1	0	0							0	1	1	0	0	0	0	1	0
714	1	2007-08-19	10	2	0	2017-09-26	3	0	2017-09-26	2017-09-24	3	2017-09-27	2017-10-03	8	67.4	67.3		1	2017-09-26	NCR	Navotas	1	<5000 PHP	Secondly	1	0	1	heart disease	0	0		1	0	0							0	0	0	0	0	0	1	0	0
715	1	2004-06-12	13	2	1	2017-09-26	3	0	2017-09-26	2017-09-21	6	2017-09-27	2017-10-05	10	67.6	67.4		1	2017-09-26	Region 4		2	5000-10000 PHP	Secondly	0	0	0		0	0		1	1	1	2017-09-25	1	22:00:00	Penicillines	Amoxicillin	Public health center	1	1	0	0	1	1	0	0	0
716	0	1958-09-17	59	3	0	2017-09-27	3	0	2017-09-27	2017-09-22	6	2017-09-28	2017-09-30	4	68	68.5		1	2017-09-27	NCR	Manila	0	<5000 PHP	Primary	0	0	0		0	0		1	1	1	2017-09-26	1	19:00:00	Fluoroqunolones	Levofloxacin	Private Clinic	1	0	1	0	0	0	0	1	0
717	0	1980-01-29	37	3	1	2017-09-27	3	0	2017-09-27	2017-09-23	5	2017-09-28	2017-10-04	8	68	68.6		1	2017-09-27	NCR	Paranaque	1	<5000 PHP	Primary	0	0	0		0	0		1	0	0							0	0	1	0	0	0	0	0	0
718	0	2014-05-19	3	1	1	2017-09-27	3	1	2017-09-28	2017-09-27	1	2017-09-28	2017-10-17	21	0	0		0		Region 3		2	<5000 PHP	Secondly	0	0	0		0	0		1	1	1	2017-09-27	0	08:00:00	Cephalosporines	Ceftriaxone	Private Clinic	1	1	1	0	1	1	0	1	0
719	0	2009-09-23	8	2	1	2017-09-28	3	0	2017-09-28	2017-09-21	8	2017-09-29	2017-10-10	13	67	0		1	2017-09-28	NCR	Manila	0	<5000 PHP	Secondly	0	0	0		0	0		1	0	0							0	0	1	0	0	0	0	0	0
720	0	2003-12-07	13	2	1	2017-09-28	3	0	2017-09-28	2017-09-22	7	2017-09-29	2017-10-08	11	67.6	66.6		1	2017-09-28	NCR	Paranaque	1	<5000 PHP	Secondly	0	0	0		0	0		1	0	0							0	0	0	0	0	0	0	0	0
721	0	1973-01-16	44	3	0	2017-09-28	3	1	2017-09-29	2017-09-22	7	2017-09-30	2017-10-05	8	145	145		1	2017-09-29	NCR	Paranaque	1	<5000 PHP	Secondly	0	0	0		0	0		1	0	0							0	1	1	0	0	0	0	1	1
722	0	2012-11-15	4	1	0	2017-10-02	3	0	2017-10-02	2017-09-29	4	2017-10-03	2017-10-08	7	65.2	0		1	2017-10-03	NCR	Manila	0	<5000 PHP	Secondly	0	0	0		0	0		1	0	0							0	0	1	0	0	0	1	1	0
723	0	2011-06-14	6	2	0	2017-10-02	3	0	2017-10-02	2017-09-28	5	2017-10-03	2017-10-10	9	0	0		1	2017-10-03	Region 3		2	<5000 PHP	Secondly	0	0	0		0	0		1	0	0							0	0	1	0	0	0	0	0	0
724	0	2007-11-21	9	2	1	2017-10-02	3	1	2017-10-03	2017-09-28	5	2017-10-05	2017-10-21	20	0	0		1	2017-10-03	Region 4		2	<5000 PHP	Secondly	0	0	0		0	0		1	0	0							0	0	1	0	0	0	0	1	0
725	1	1999-05-31	18	3	1	2017-10-03	3	0	2017-10-03	2017-09-29	5	2017-10-04	2017-10-08	6	67.1	67		1	2017-10-03	NCR	Paranaque	1	<5000 PHP	Secondly	0	0	0		0	0		1	0	0							0	0	1	0	1	1	0	0	0
726	1	1998-01-17	19	3	1	2017-10-03	3	0	2017-10-03	2017-09-28	6	2017-10-04	2017-10-05	3	69.1	68		1	2017-10-03	NCR	Quezon	1	<5000 PHP	Vocational	0	0	0		0	0		1	0	0							0	0	1	0	0	1	1	1	0
727	0	2000-08-08	17	2	1	2017-10-03	3	1	2017-10-04	2017-09-29	5	2017-10-04	2017-10-10	8	67.8	68.1		1	2017-10-04	NCR	Paranaque	1	<5000 PHP	Secondly	0	0	1	lung disease;others	0	0		1	0	0							0	0	1	0	0	1	0	0	0
728	0	2003-03-01	14	2	1	2017-10-04	3	0	2017-10-04	2017-09-30	5	2017-10-03	2017-10-12	9	67.8	67.2		1	2017-10-04	NCR	Valenzuela	1	5000-10000 PHP	Secondly	0	0	0		0	0		1	0	0							0	1	1	0	0	0	1	0	0
729	0	1990-09-08	27	3	1	2017-10-05	3	0	2017-10-05	2017-10-01	5	2017-10-06	2017-10-11	7	70.8	69.3		1	2017-10-05	NCR	Manila	0	<5000 PHP	Primary	0	0	0		2	0		1	0	0							0	1	1	0	0	0	1	1	0
730	0	2011-04-14	6	2	1	2017-10-05	3	0	2017-10-05	2017-10-02	4	2017-10-06	2017-10-18	14	67.8	0		0		NCR	Manila	0	15000-20000 PHP	Tertiary	0	0	1	others	0	0		1	0	0							0	1	0	0	0	0	1	1	0
731	0	2005-05-09	12	2	0	2017-10-06	3	0	2017-10-06	2017-09-28	9	2017-10-08	2017-10-25	20	68.8	67.2		1	2017-10-06	NCR	Caloocan	1	<5000 PHP	Secondly	0	0	0		0	0		1	1	2	2017-10-04	2	20:00:00	Cephalosporines	Cephalexin	Others	1	1	0	0	0	0	1	1	0
732	0	1992-05-06	25	3	1	2017-10-06	3	0	2017-10-06	2017-10-02	5	2017-10-07	2017-10-11	6	68.5	67.8		1	2017-10-06	Region 4		2	5000-10000 PHP	Secondly	0	0	0		2	1	15	1	1	2	2017-10-05	1	12:15:00	Penicillines	Amoxicillin	Public health center	1	0	1	0	1	0	0	0	0
733	0	1978-08-18	39	3	1	2017-10-06	3	0	2017-10-06	2017-10-04	3	2017-10-07	2017-10-10	5	67.7	68.6		1	2017-10-06	Region 4		2	<5000 PHP	Vocational	0	0	0		2	0		1	0	0							0	0	1	0	1	1	0	0	0
734	0	2009-01-15	8	2	1	2017-10-09	3	0	2017-10-09	2017-09-21	19	2017-10-10	2017-10-15	7	67	0		1	2017-10-09	NCR	Caloocan	1	<5000 PHP	Vocational	0	0	0		0	0		1	1	7	2017-10-05	4	08:00:00	Cephalosporines	Cephalexin	Public health center	1	0	0	0	0	0	0	0	0
735	0	2010-05-31	7	2	0	2017-10-09	3	0	2017-10-09	2017-10-04	6	2017-10-10	2017-10-13	5	67.3	66.2		1	2017-10-10	NCR	Paranaque	1	<5000 PHP	Secondly	0	0	0		0	0		1	1	1	2017-10-08	1	21:00:00	Unknown	Others		0	0	0	0	1	1	0	0	0
736	1	1998-01-08	19	3	0	2017-10-10	3	0	2017-10-10	2017-10-06	5	2017-10-12	2017-10-12	3	68.2	67		1	2017-10-10	NCR	Quezon	1	<5000 PHP	Tertiary	0	0	0		0	0		1	1	2	2017-10-09	1	18:00:00	Unknown	Unknown	Other Hospital	1	0	1	0	0	0	1	0	0
737	0	1968-10-25	48	3	1	2017-10-10	3	0	2017-10-10	2017-10-04	7	2017-10-11	2017-10-15	6	68.3	68.7		1	2017-10-10	Region 4		2	<5000 PHP	Vocational	0	0	0		2	1	30	1	1	1	2017-10-09	1	17:00:00	B-lactamase Inhibitors	Co-Amoxiclav	Other Hospital	1	0	1	1	0	0	0	0	0
738	1	2008-07-13	9	2	0	2017-10-10	3	0	2017-10-10	2017-10-05	6	2017-10-11	2017-10-12	3	67.1	69.6		1	2017-10-10	NCR	Manila	0	5000-10000 PHP	Vocational	0	0	0		0	0		1	0	0							0	0	1	0	0	0	1	1	0
739	0	2004-05-16	13	2	1	2017-10-10	3	0	2017-10-10	2017-10-08	3	2017-10-11	2017-10-20	11	68.8	68.9		1	2017-10-10	NCR	Caloocan	1	<5000 PHP	Secondly	0	0	0		2	1	4	1	0	0							0	0	1	0	1	0	0	1	0
740	0	1981-11-28	35	3	1	2017-10-11	3	0	2017-10-11	2017-09-27	15	2017-10-12	2017-10-13	3	68.6	67.9		0		Region 4		2	5000-10000 PHP	Secondly	0	0	0		0	1	6	1	0	0							0	1	1	0	0	0	0	1	0
741	0	2009-11-22	7	2	1	2017-10-11	3	0	2017-10-11	2017-10-09	3	2017-10-12	2017-10-15	5	70.4	69		1	2017-10-11	NCR	Manila	0	<5000 PHP	Tertiary	0	0	0		0	0		1	1	1	2017-10-11	0	15:00:00	B-lactamase Inhibitors	Co-Amoxiclav	Private Clinic	1	0	1	0	0	0	1	0	0
742	0	1979-10-04	38	3	1	2017-10-11	3	0	2017-10-11	2017-10-08	4	2017-10-12	2017-10-14	4	67.5	69.1		1	2017-10-11	NCR	Caloocan	1	<5000 PHP	Secondly	0	0	0		2	1	6	1	1	1	2017-10-10	1	22:00:00	Penicillines	Amoxicillin	Other Hospital	0	1	1	1	0	0	0	1	0
743	0	2007-12-11	9	2	1	2017-10-11	3	0	2017-10-11	2017-10-11	1	2017-10-12	2017-10-17	7	67	0		0		NCR	Manila	0	<5000 PHP	Secondly	0	0	0		0	0		1	0	0							0	1	1	1	1	1	1	1	0
744	0	2003-06-15	14	2	1	2017-10-12	3	0	2017-10-12	2017-10-03	10	2017-10-13	2017-10-20	9	68	68.3		1	2017-10-12	NCR	Manila	0	<5000 PHP	Vocational	0	0	0		0	0		1	0	0							9	1	1	0	0	0	0	0	0
745	0	2009-11-07	7	2	0	2017-10-12	3	0	2017-10-12	2017-10-08	5	2017-10-13	2017-10-27	16	66.1	66		1	2017-10-12	Region 4		2	<5000 PHP	Secondly	0	0	0		0	0		1	0	0							0	1	1	0	0	0	0	1	0
746	0	2001-03-26	16	2	1	2017-10-13	3	0	2017-10-13	2017-10-09	5	2017-10-14	2017-10-26	14	0	67.7		0		NCR	Quezon	1	<5000 PHP	Vocational	0	0	0		0	0		1	1	2	2017-10-12	1	21:00:00	Penicillines	Amoxicillin	Private Clinic	1	1	0	0	0	0	0	1	0
747	1	1997-03-11	20	3	1	2017-10-17	3	0	2017-10-17	2017-10-12	6	2017-10-18	2017-10-20	4	68	68.6		1	2017-10-18	NCR	Pasay	1	5000-10000 PHP	Secondly	0	0	0		2	0		1	1	5	2017-10-17	0	04:00:00	B-lactamase Inhibitors	Co-Amoxiclav	Other Hospital	1	1	1	1	1	1	0	0	0
748	1	1987-03-22	30	3	0	2017-10-17	3	0	2017-10-17	2017-10-07	11	2017-10-18	2017-10-19	3	65.9	67.5		1	2017-10-17	NCR	Quezon	1	<5000 PHP	Secondly	0	0	0		0	0		1	0	0							0	1	1	0	1	1	0	0	0
749	0	2012-06-29	5	2	1	2017-10-17	3	0	2017-10-17	2017-10-12	6	2017-10-18	2017-10-29	13	66.4	68.8		0		Region 4		2	<5000 PHP	Secondly	0	0	0		0	0		1	0	0							0	0	1	0	0	0	0	0	0
750	0	1998-02-26	19	3	1	2017-10-18	3	0	2017-10-18	2017-10-15	4	2017-10-19	2017-10-22	5	68.2	67		1	2017-10-18	NCR	Manila	0	<5000 PHP	Secondly	0	0	0		2	0		1	0	0							0	0	1	0	0	0	1	1	0
751	0	1969-05-08	48	3	1	2017-10-18	3	0	2017-10-18	2017-10-08	11	2017-10-20	2017-10-20	3	68.5	67.2		0		NCR	Caloocan	1	<5000 PHP	Secondly	0	0	0		2	1	4	1	0	0							0	0	1	0	0	0	1	1	1
752	0	2006-07-04	11	2	1	2017-10-19	3	0	2017-10-19	2017-10-07	13	2017-10-28	2017-10-30	12	67.5	67		1	2017-10-19	Region 4		2	<5000 PHP	Secondly	0	0	1	others	0	0		1	1	7	2017-10-18	1	08:00:00	Cephalosporines	Cephalexin	Public health center	1	0	0	0	0	0	1	1	0
753	0	1954-03-28	63	3	1	2017-10-19	3	0	2017-10-19	2017-10-12	8	2017-10-20	2017-10-20	2	67.4	66.3		0		NCR	Manila	0	<5000 PHP	Secondly	0	0	1	others	2	1	7	1	1	2	2017-10-18	1	13:00:00	Fluoroqunolones	Levofloxacin	Other Hospital	1	0	1	0	0	0	0	1	1
754	0	1979-06-18	38	3	1	2017-10-20	3	0	2017-10-20	2017-10-14	7	2017-10-21	2017-10-24	5	67	67		1	2017-10-20	NCR	Paranaque	1	<5000 PHP	Secondly	0	0	0		2	1	15	1	0	0							0	0	1	0	0	0	0	0	0
755	0	2008-12-18	8	2	1	2017-10-20	3	2	2017-10-22	2017-10-16	5	2017-10-21	2017-10-24	5	67	67		1	2017-10-20	NCR	Manila	0	10000-15000 PHP	Tertiary	0	0	0		0	0		1	1	2	2017-10-19	1	12:00:00	Penicillines	Amoxicillin	Public health center	1	0	1	0	0	0	0	0	0
756	0	1942-08-30	75	3	1	2017-10-20	3	0	2017-10-20	2017-10-03	18	2017-10-21	2017-10-27	8	68.2	0		0	2017-10-23	NCR	Malabon	1	<5000 PHP	Primary	0	0	0		0	0		1	1	7	2017-10-20	0	08:00:00	B-lactamase Inhibitors	Co-Amoxiclav	Private Clinic	1	1	0	0	0	0	0	1	0
757	0	2012-05-01	5	2	1	2017-10-20	3	0	2017-10-20	2017-10-08	13	2017-10-21	2017-10-26	7	0	0		1	2017-10-23	Region 4		2	<5000 PHP	Secondly	0	0	0		0	0		1	0	0							0	0	0	0	0	0	1	1	0
758	0	2011-01-06	6	2	0	2017-10-23	3	0	2017-10-23	2017-10-22	2	2017-10-24	2017-10-29	7	0	0		0		Region 3		2	<5000 PHP	Secondly	0	0	0		0	0		1	0	0							0	1	1	0	1	1	0	1	0
759	1	1994-06-25	23	3	1	2017-10-24	3	0	2017-10-24	2017-10-20	5	2017-10-25	2017-10-27	4	69.3	70.3		1	2017-10-24	NCR	Pasay	1	10000-15000 PHP	Tertiary	0	0	0		2	1	3	1	1	2	2017-10-24	0	03:00:00	Fluoroqunolones	Ciprofloxacin	Private Clinic	1	0	1	0	1	1	0	0	0
760	1	2009-06-03	8	2	0	2017-10-24	3	0	2017-10-24	2017-10-18	7	2017-10-25	2017-10-27	4	67.4	67.7		1	2017-10-24	NCR	Valenzuela	1	<5000 PHP	Secondly	0	0	0		0	0		1	1	3	2017-10-23	1	23:00:00	Unknown	Unknown	Private Clinic	1	1	1	0	1	1	1	0	0
761	0	1996-09-17	21	3	1	2017-10-23	3	2	2017-10-25	2017-10-18	6	2017-10-24	2017-10-27	5	66.6	66.2		1	2017-10-25	NCR	Manila	0	<5000 PHP	Secondly	0	0	0		2	1	9	1	0	0							0	0	0	0	0	0	1	0	0
762	0	1995-06-25	22	3	1	2017-10-25	3	0	2017-10-25	2017-10-22	4	2017-10-26	2017-10-31	7	67	66.9		1	2017-10-25	Region 3		2	5000-10000 PHP	Secondly	0	0	0		2	0		1	0	0							0	0	1	0	1	1	1	1	0
763	0	1985-06-30	32	3	1	2017-10-25	3	0	2017-10-25	2017-10-18	8	2017-10-25	2017-10-29	5	66.6	66.6		1	2017-10-25	NCR	Las Pinas	1	<5000 PHP	Secondly	0	0	0		2	1	15	1	0	0							0	1	1	0	1	0	1	0	0
764	0	2012-09-15	5	2	0	2017-10-26	3	0	2017-10-26	2017-10-25	2	2017-10-26	2017-10-26	1				0		Region 3		2	<5000 PHP	Secondly	0	0	0		0	0		1	1	1	2017-10-26	0	06:00:00	Unknown	Unknown	Other Hospital	1	1	0	1	1	1	0	1	0
765	0	1984-11-01	32	3	1	2017-10-26	3	0	2017-10-26	2017-10-22	5	2017-10-27	2017-11-02	8	67.7	67.1		1	2017-10-26	Region 4		2	<5000 PHP	Secondly	0	0	0		2	1	15	1	0	0							0	0	1	1	0	0	0	0	0
766	0	1979-06-18	38	3	1	2017-10-25	3	1	2017-10-26	2017-10-23	3	2017-10-26	2017-10-30	6	67.2	67.8		1	2017-10-26	NCR	Malabon	1	5000-10000 PHP	Secondly	1	0	1	diabetes;others	0	0		1	0	0							0	1	1	0	0	0	1	0	0
767	0	1973-09-10	44	3	0	2017-10-27	3	0	2017-10-27	2017-10-18	10	2017-10-28	2017-10-30	4	69	68.3		0		NCR	Caloocan	1	5000-10000 PHP	Secondly	0	0	1	others	0	0		0	0	0							0	1	1	1	0	0	0	1	0
768	0	1983-09-30	34	3	0	2017-10-27	3	0	2017-10-27	2017-10-11	17	2017-10-28	2017-11-08	13	70.3	69.1		1	2017-10-27	NCR	Caloocan	1	<5000 PHP	Secondly	0	0	0		0	0		1	1	7	2017-10-25	2	20:00:00	B-lactamase Inhibitors	Co-Amoxiclav	Public health center	1	0	1	0	1	1	1	0	0
769	0	1992-05-02	25	3	1	2017-10-27	3	0	2017-10-27	2017-10-25	3	2017-10-28	2017-11-12	17	0	68		1	2017-10-27	NCR	Manila	0	5000-10000 PHP	Tertiary	0	0	0		2	0		0	0	0							0	0	0	0	0	0	0	0	0
770	0	1994-04-02	23	3	1	2017-10-28	3	2	2017-10-30	2017-10-22	7	2017-10-29	2017-11-11	15	67.5	68.4		1	2017-10-30	NCR	Manila	0	<5000 PHP	Secondly	1	0	1		2	1	15	1	1	1	2017-10-25	3	15:00:00	Penicillines	Amoxicillin	Pharmacy	0	1	1	0	1	1	1	0	0
771	0	1984-12-19	32	3	1	2017-10-30	3	0	2017-10-30	2017-10-23	8	2017-10-30	2017-11-02	4	67.4	68.4		1	2017-10-30	NCR	Manila	0	5000-10000 PHP	Tertiary	0	0	0		0	0		1	1	4	2017-10-30	0	06:00:00	Cephalosporines	Cefuroxime	Private Clinic	1	0	1	1	0	0	1	1	0
772	0	1973-02-20	44	3	1	2017-11-02	3	0	2017-11-02	2017-10-28	6	2017-11-02	2017-11-06	5	68.6	68.6		1	2017-11-02	NCR	Manila	0	<5000 PHP	Primary	0	0	0		2	0		1	0	0							0	0	0	0	0	0	1	1	0
773	0	1966-06-09	51	3	0	2017-11-02	3	0	2017-11-02	2017-10-27	7	2017-11-03	2017-11-10	9	69.3	69.4		1	2017-11-03	NCR	Manila	0	<5000 PHP	Secondly	0	0	0		0	0		1	0	0							0	0	1	0	0	0	1	1	0
774	0	1965-09-02	52	3	0	2017-11-02	3	0	2017-11-02	2017-11-01	2	2017-11-02	2017-11-02	1	66.3	67.3		0		NCR	Manila	0	<5000 PHP	Secondly	0	0	0		0	0		0	0	0							0	1	1	0	1	1	0	1	0
775	0	1998-08-23	19	3	1	2017-11-03	3	0	2017-11-03	2017-10-28	7	2017-11-04	2017-11-07	5	69.3	67.8		1	2017-11-03	NCR	Quezon	1	<5000 PHP	Secondly	0	0	0		1	1	15	1	1	2	2017-10-31	3	21:00:00	Penicillines	Amoxicillin		0	1	1	0	0	0	1	0	0
776	0	2001-12-19	15	2	0	2017-11-03	3	0	2017-11-03	2017-11-01	3	2017-11-04	2017-11-28	26	0	68.2		1	2017-11-03	NCR	Valenzuela	1	<5000 PHP	Secondly	0	0	0		0	0		1	1	2	2017-11-03	0	17:00:00	B-lactamase Inhibitors	Co-Amoxiclav	Public health center	1	1	1	0	0	0	1	0	0
777	1	1999-04-10	18	3	0	2017-11-05	3	1	2017-11-06	2017-11-03	3	2017-11-06	2017-11-10	6	68.6	66.3		1	2017-11-06	NCR	Manila	0	<5000 PHP	Secondly	0	0	0		0	0		1	0	0							0	0	0	0	1	1	1	0	0
778	1	1999-09-18	18	3	1	2017-11-06	3	0	2017-11-06	2017-11-03	4	2017-11-07	2017-11-11	6	66.9	67.4		1	2017-11-06	NCR	Valenzuela	1	<5000 PHP	Secondly	0	0	0		0	0		1	0	0							0	1	1	0	0	0	0	1	0
780	0	1985-02-21	32	3	0	2017-11-06	3	1	2017-11-07	2017-10-17	21	2017-11-08	2017-11-18	13	0	0		0		NCR	Manila	0	<5000 PHP	Tertiary	1	0	0		0	0		1	0	0							0	1	0	0	0	0	1	1	0
781	0	1992-11-06	25	3	1	2017-11-06	3	1	2017-11-07	2017-11-02	5	2017-11-07	2017-11-12	7	66.2	66.4		1	2017-11-07	NCR	Caloocan	1	5000-10000 PHP	Secondly	0	0	0		2	1	4	1	0	0							0	0	1	0	0	0	1	1	0
782	1	1992-11-22	24	3	1	2017-11-07	3	0	2017-11-07	2017-11-03	5	2017-11-08	2017-11-10	4	66.4	68.1		1	2017-11-07	Region 3		2	5000-10000 PHP	Vocational	0	0	0		0	0		1	0	0							0	1	1	0	1	1	0	0	0
783	1	1997-09-19	20	3	1	2017-11-07	3	0	2017-11-07	2017-11-02	6	2017-11-08	2017-11-11	5	69.2	67.7		1	2017-11-07	NCR	Manila	0	<5000 PHP	Secondly	0	0	0		0	0		1	0	0							0	1	1	0	1	1	0	0	0
784	0	1996-10-29	21	3	0	2017-11-08	3	0	2017-11-08	2017-11-02	7	2017-11-08	2017-11-10	3	0	0		1	2017-11-08	Region 4		2	5000-10000 PHP	Tertiary	0	0	0		0	0		1	1	2	2017-11-07	1	20:00:00	Fluoroqunolones	Ciprofloxacin	Private Clinic	1	0	1	0	0	1	0	0	0
785	0	1949-12-15	67	3	0	2017-11-08	3	0	2017-11-08	2017-11-01	8	2017-11-09	2017-11-11	4	68.7	69.3		1	2017-11-08	NCR	Manila	0	<5000 PHP	Secondly	1	0	1	diabetes	0	0		1	0	0							0	0	0	0	0	0	0	0	1
786	0	1996-06-12	21	3	1	2017-11-08	3	1	2017-11-09	2017-10-30	10	2017-11-09	2017-11-10	3	66.8	67.9		1	2017-11-09	NCR	Quezon	1	<5000 PHP	Tertiary	0	0	0		0	0		1	0	0							0	0	1	0	1	1	0	0	1
787	0	1956-10-22	61	3	1	2017-11-09	3	0	2017-11-09	2017-11-04	6	2017-11-10	2017-11-13	5	68.9	69.6		0		NCR	Caloocan	1	<5000 PHP	Secondly	0	0	1	others	2	1	15	1	0	0							0	0	1	0	0	0	0	0	0
788	0	1961-11-10	56	3	1	2017-11-10	3	0	2017-11-10	2017-11-06	5	2017-11-11	2017-11-14	5	69.6	70		0		NCR	Malabon	1	5000-10000 PHP	Vocational	0	0	1	others	0	0		1	1	1	2017-11-08	2	22:22:00	B-lactamase Inhibitors	Co-Amoxiclav	Private Clinic	1	1	1	0	1	0	0	1	0
789	0	2003-02-14	14	2	0	2017-11-10	3	0	2017-11-10	2017-11-07	4	2017-11-11	2017-11-16	7	69.2	69.1		1	2017-11-10	NCR	Valenzuela	1	<5000 PHP	Secondly	0	0	0		0	0		1	0	0							0	0	1	0	0	0	1	1	0
790	1	1994-04-16	23	3	0	2017-11-15	3	1	2017-11-16	2017-11-11	5	2017-11-16	2017-11-18	4	67	67		1	2017-11-16	Region 4		2	10000-15000 PHP	Secondly	0	0	1	others	0	0		1	0	0							0	1	1	0	0	0	0	0	0
791	0	1993-12-21	23	3	0	2017-11-15	3	1	2017-11-16	2017-11-12	4	2017-11-19	2017-11-22	8	67	67		1	2017-11-16	NCR	Manila	0	<5000 PHP	Secondly	0	0	0		0	0		1	0	0							0	1	1	0	0	0	1	1	0
792	0	1970-09-19	47	3	1	2017-11-15	3	1	2017-11-16	2017-11-11	5	2017-11-16	2017-11-22	8	67.9	67.2		1	2017-11-16	NCR	Mandaluyong	1	10000-15000 PHP	Vocational	0	0	0		0	0		1	0	0							0	1	0	0	0	0	0	1	0
793	1	1994-05-13	23	3	0	2017-11-15	3	1	2017-11-16	2017-11-10	6	2017-11-15	2017-11-19	5	68.9	68.4		1	2017-11-16	NCR	Quezon	1	<5000 PHP	Tertiary	0	0	0		0	0		1	1	1	2017-11-14	1	02:00:00	Cephalosporines	Cephalexin	Private Clinic	1	1	1	0	1	1	0	0	0
794	0	2012-07-30	5	2	0	2017-11-17	3	0	2017-11-17	2017-11-14	4	2017-11-18	2017-12-06	20	0	0		0		Region 3		2	<5000 PHP	Secondly	0	0	0		0	0		1	1	1	2017-11-16	1	18:00:00	Penicillines	Amoxicillin	Other Hospital	0	1	0	0	0	0	0	1	0
795	0	2014-02-25	3	1	1	2017-11-16	3	1	2017-11-17	2017-11-13	4	2017-11-17	2017-11-24	9	0	0		0		NCR	Caloocan	1	5000-10000 PHP	Secondly	1	0	1	others	0	0		1	0	0							0	0	1	0	0	0	0	0	0
796	0	1997-11-04	20	3	0	2017-11-17	3	0	2017-11-17	2017-11-10	8	2017-11-18	2017-11-24	8	70.3	67.6		1	2017-11-17	NCR	Malabon	1	<5000 PHP	Tertiary	0	0	1	others	0	0		1	0	0							0	0	1	0	0	0	0	0	0
797	0	1972-11-04	45	3	1	2017-11-19	3	1	2017-11-20	2017-11-17	3	2017-11-21	2017-11-24	6	66.8	66.8		1	2017-11-20	NCR	Pasay	1	<5000 PHP	Secondly	0	0	0		2	1	15	1	0	0							0	1	1	0	0	0	0	0	0
799	0	1996-12-23	20	3	0	2017-11-20	3	0	2017-11-20	2017-11-13	8	2017-11-21	2017-11-24	5	67.3	67.5		1	2017-11-20	NCR	Quezon	1	<5000 PHP	Primary	0	0	0		0	0		0	0	0							0	0	1	0	0	0	0	0	0
800	0	1998-02-07	19	3	1	2017-11-20	3	1	2017-11-21	2017-11-15	6	2017-11-21	2017-11-24	5	68.5	67.3		1	2017-11-21	NCR	Manila	0	<5000 PHP	Tertiary	0	0	0		2	0		1	0	0							0	0	1	0	0	0	1	1	0
801	1	1992-10-10	25	3	1	2017-11-20	3	1	2017-11-21	2017-11-18	3	2017-11-21	2017-11-24	5	68.7	68.2		1	2017-11-21	NCR	Manila	0	5000-10000 PHP	Secondly	0	0	0		2	0		1	0	0							0	0	1	0	0	1	0	0	0
802	1	1986-05-24	31	3	1	2017-11-20	3	1	2017-11-21	2017-11-20	1	2017-11-21	2017-11-24	5	69.1	68		1	2017-11-21	NCR	Paranaque	1	<5000 PHP	Secondly	0	0	0		2	0		1	0	0							0	1	1	0	1	1	0	0	0
803	0	1975-05-06	42	3	0	2017-11-22	3	0	2017-11-22	2017-11-21	2	2017-11-23	2017-11-24	3	67.7	68.8		1	2017-11-22	NCR	Quezon	1	<5000 PHP	Primary	0	0	0		0	0		1	0	0							0	0	1	0	0	0	0	0	0
804	0	1992-06-01	25	3	1	2017-11-21	3	1	2017-11-22	2017-11-16	6	2017-11-22	2017-11-26	6	68	67.1		1	2017-11-22	NCR	Manila	0	<5000 PHP	Secondly	0	0	0		2	1	7	1	0	0							0	0	1	0	0	0	1	1	0
806	0	1995-04-06	22	3	1	2017-11-22	3	1	2017-11-23	2017-11-12	11	2017-11-23	2017-11-27	6	67.8	67.9		1	2017-11-23	NCR	Caloocan	1	<5000 PHP	Secondly	0	0	1	others	2	0		1	1	7	2017-11-18	4	08:00:00	Macrolides	Clarithromycin	Other Hospital	1	0	0	0	0	0	1	1	0
807	0	2003-05-13	14	2	1	2017-11-22	3	1	2017-11-23	2017-11-21	2	2017-11-23	2017-11-24	3	67.8	67		1	2017-11-23	NCR	Manila	0	<5000 PHP	Secondly	0	0	1	others	0	0		1	0	0							0	0	1	0	0	0	1	0	0
808	0	2003-01-15	14	2	0	2017-11-23	3	0	2017-11-23	2017-11-09	15	2017-11-24	2017-11-27	5	67.4	67.2		1	2017-11-23	NCR	Manila	0	<5000 PHP	Secondly	0	0	1	others	0	0		1	0	0							0	0	0	0	0	0	1	0	0
809	0	1977-08-09	40	3	1	2017-11-23	3	1	2017-11-24	2017-11-19	5	2017-11-24	2017-11-24	2	0	0		1	2017-11-24	NCR	Manila	0	<5000 PHP	Secondly	0	0	0		1	0		1	0	0							0	1	0	0	0	0	0	1	0
810	0	2015-05-29	2	1	1	2017-11-24	3	0	2017-11-24	2017-11-20	5	2017-11-25	2017-11-29	6	64	0		0		NCR	Quezon	1	5000-10000 PHP	Secondly	0	0	0		0	0		1	0	0							0	1	0	0	0	0	1	1	0
811	0	1992-09-22	25	3	0	2017-11-27	3	0	2017-11-27	2017-11-25	3	2017-11-28	2017-11-30	4	66.8	66		1	2017-11-27	NCR	Manila	0	<5000 PHP	Secondly	0	0	0		2	1	4	1	0	0							0	0	1	0	0	0	0	0	0
812	0	2006-10-09	11	2	0	2017-11-27	3	0	2017-11-27	2017-11-24	4	2017-11-28	2017-11-30	4	67	66.2		1	2017-11-27	NCR	Valenzuela	1	5000-10000 PHP	Secondly	0	0	0		0	0		1	0	0							0	0	1	0	0	1	1	0	0
813	1	1995-03-09	22	3	0	2017-11-28	3	0	2017-11-28	2017-11-24	5	2017-11-28	2017-12-04	7	66.6	67.7		1	2017-11-28	NCR	Manila	0			0	0	0		2	0		1	0	0							0	0	1	0	0	0	0	0	0
814	0	1998-07-12	19	3	1	2017-11-27	3	1	2017-11-28	2017-11-18	10	2017-11-28	2017-11-30	4	67.1	66.6		1	2017-11-28	NCR	Manila	0	<5000 PHP	Tertiary	0	0	0		2	0		1	0	0							0	0	1	0	0	1	0	0	0
815	1	1996-08-10	21	3	1	2017-11-28	3	0	2017-11-28	2017-11-24	5	2017-11-29	2017-12-01	4	66.3	66		1	2017-11-28	NCR	Paranaque	1	<5000 PHP	Secondly	0	0	0		2	0		1	0	0							0	0	1	0	0	0	0	0	0
816	0	2004-03-08	13	2	1	2017-11-29	3	0	2017-11-29	2017-11-25	5	2017-11-30	2017-11-30	2	0	65.6		1	2017-11-29	Region 4		2	5000-10000 PHP	Secondly	0	0	0		0	0		1	1	3	2017-11-27	2	21:00:00	B-lactamase Inhibitors	Co-Amoxiclav	Private Clinic	1	0	1	1	0	0	0	1	0
817	0	2011-10-03	6	2	0	2017-11-29	3	0	2017-11-29	2017-11-22	8	2017-11-30	2017-12-02	4	65.4	65.4		1	2017-11-29	NCR	Manila	0	5000-10000 PHP	Tertiary	0	0	0		0	0		1	1	4	2017-11-27	2	19:00:00	Macrolides	Clarithromycin	Private Clinic	1	0	0	0	0	0	1	0	0
818	0	2011-12-16	5	2	1	2017-12-01	3	0	2017-12-01	2017-11-30	2	2017-12-02	2017-12-04	4	67	66.3		1	2017-12-01	NCR	Caloocan	1	<5000 PHP	Secondly	0	0	1	others	0	0		1	0	0							0	0	0	0	0	0	1	0	0
819	0	2008-12-18	8	2	1	2017-12-01	3	0	2017-12-01	2017-11-21	11	2017-12-02	2017-12-04	4	0	67.1		1	2017-12-01	Region 4		2	5000-10000 PHP	Secondly	0	0	0		0	0		1	0	0							0	0	1	0	0	0	1	1	0
820	0	1988-03-23	29	3	0	2017-12-01	3	0	2017-12-01	2017-11-26	6	2017-12-02	2017-12-09	9	68.9	67.1		0		NCR	Quezon	1	15000-20000 PHP	Tertiary	0	0	0		2	1	1	1	1	2	2017-11-30	1	21:00:00	Tetracyclines	Doxycycline	Other Hospital	1	0	1	0	1	0	0	0	0
821	0	1972-10-17	45	3	0	2017-12-03	3	1	2017-12-04	2017-12-02	2	2017-12-04	2017-12-05	3	68.8	66.5		1	2017-12-04	NCR	Manila	0	10000-15000 PHP	Tertiary	1	0	1	others	0	0		1	0	0							0	0	1	1	0	0	0	0	0
822	0	2015-04-06	2	1	1	2017-12-01	3	0	2017-12-01	2017-11-29	3	2017-12-02	2017-12-11	11	0	0		0		NCR	Pasig	1	<5000 PHP	Primary	0	0	1	others	0	0		1	0	0							0	1	0	0	0	0	1	1	0
823	0	2015-07-27	2	1	1	2017-12-04	3	0	2017-12-04	2017-12-03	2	2017-12-04	2017-12-04	1	0	0		0		Region 3		2	<5000 PHP	Primary	0	0	0		0	0		1	0	0							0	0	1	1	1	1	1	1	0
824	1	1986-07-06	31	3	0	2017-12-04	3	1	2017-12-05	2017-12-01	4	2017-12-05	2017-12-07	4	68.6	67.7		1	2017-12-05	NCR	Manila	0	5000-10000 PHP	Secondly	0	0	0		0	0		1	0	0							0	0	1	0	0	1	0	0	0
825	1	1995-06-21	22	3	0	2017-12-05	3	0	2017-12-05	2017-11-30	6	2017-12-06	2017-12-07	3	67.8	68.4		1	2017-12-05	Region 4		2	10000-15000 PHP	Tertiary	0	0	0		0	0		1	1	4	2017-12-04	1	22:00:00	Fluoroqunolones	Levofloxacin	Private Clinic	1	1	1	0	0	1	1	0	0
826	0	2011-08-14	6	2	1	2017-12-05	3	0	2017-12-05	2017-12-02	4	2017-12-06	2017-12-06	2	0	0		0		Region 4		2	<5000 PHP	Secondly	0	0	0		0	0		1	1	2	2017-12-04	1		Macrolides	Clarithromycin	Private Clinic	1	1	0	0	0	0	1	1	0
827	0	2001-11-30	16	2	0	2017-12-06	3	0	2017-12-06	2017-12-01	6	2017-12-07	2017-12-10	5	66	66.7		1	2017-12-06	NCR	Las Pinas	1	<5000 PHP	Secondly	0	0	0		0	0		1	1	1	2017-12-03	3	08:00:00	Penicillines	Amoxicillin	Public health center	1	0	1	0	0	0	1	1	0
828	0	1992-08-22	25	3	1	2017-12-06	3	0	2017-12-06	2017-12-02	5	2017-12-07	2017-12-10	5	67.5	68.6		1	2017-12-06	NCR	Caloocan	1	<5000 PHP	Primary	0	0	0		0	0		0	0	0							0	0	1	0	0	0	1	1	0
829	0	1969-10-11	48	3	1	2017-12-07	3	0	2017-12-07	2017-12-01	7	2017-12-08	2017-12-26	20	0	68.2		1	2017-12-07	NCR	Pasay	1	<5000 PHP	Secondly	0	0	1	diabetes	0	0		1	1	2	2017-12-04	3	09:00:00	Unknown	Unknown	Private Clinic	1	0	0	1	0	0	0	0	0
830	0	2001-01-03	16	2	0	2017-12-07	3	0	2017-12-07	2017-12-03	5	2017-12-08	2017-12-11	5	68.1	67.1		1	2017-12-07	NCR	Las Pinas	1	<5000 PHP	Secondly	0	0	0		0	0		1	0	0							0	0	1	0	0	1	0	0	0
832	0	1988-05-14	29	3	0	2017-12-11	3	0	2017-12-11	2017-12-04	8	2017-12-12	2017-12-15	5	0	0		1	2017-12-14	NCR	Manila	0	15000-20000 PHP	Tertiary	0	0	0		0	0		1	1	6	2017-12-10	1	08:00:00	Fluoroqunolones	Ciprofloxacin	Other Hospital	1	0	1	0	0	0	1	0	0
833	0	1994-12-27	22	3	1	2017-12-10	3	1	2017-12-11	2017-12-04	7	2017-12-11	2017-12-13	4	0	0		1	2017-12-11	NCR	Quezon	1	<5000 PHP	Secondly	0	0	1	others	2	0		1	0	0							0	1	1	0	0	0	1	1	0
834	0	2007-04-25	10	2	1	2017-12-11	3	0	2017-12-11	2017-12-10	2	2017-12-11	2017-12-15	5	0	0		0		NCR	Manila	0	<5000 PHP	Secondly	0	0	0		0	0		1	0	0							0	1	1	0	0	1	0	0	0
835	0	1973-02-03	44	3	1	2017-12-11	3	0	2017-12-11	2017-12-01	11	2017-12-13	2017-12-16	6	0	66.1		1	2017-12-11	Region 3		2	<5000 PHP	Secondly	0	0	0		2	1	10	1	0	0							0	0	1	0	0	0	0	0	0
836	1	1977-11-24	40	3	0	2017-12-11	3	1	2017-12-12	2017-12-09	3	2017-12-12	2017-12-14	4	67	67		1	2017-12-12	NCR	Quezon	1	<5000 PHP	Secondly	0	0	0		0	0		1	0	0							0	1	1	0	1	1	1	0	0
837	1	2001-08-12	16	2	1	2017-12-11	3	1	2017-12-12	2017-12-09	3	2017-12-12	2017-12-14	4	66	0		1	2017-12-12	NCR	Manila	0	<5000 PHP	Secondly	0	0	0		0	0		1	0	0							0	0	1	0	0	0	0	0	0
838	0	1982-02-15	35	3	0	2017-12-12	3	1	2017-12-13	2017-11-22	21	2017-12-13	2017-12-14	3	67.2	67		0		NCR	Navotas	1	<5000 PHP	Secondly	0	0	0		0	0		1	1	1	2017-12-11	1	09:00:00	Cephalosporines	Cefuroxime	Public health center	1	0	1	0	0	0	1	1	0
839	0	1998-12-07	19	3	0	2017-12-12	3	1	2017-12-13	2017-12-09	4	2017-12-13	2017-12-16	5	68.2	67.3		1	2017-12-13	NCR	Manila	0	<5000 PHP	Secondly	0	0	0		2	0		1	0	0							0	0	1	0	0	0	1	0	0
840	0	2000-12-12	17	2	1	2017-12-12	3	1	2017-12-13	2017-12-09	4	2017-12-19	2017-12-23	12	0	0		0		Region 3		2	<5000 PHP	Secondly	0	0	1	others	2	1	15	1	0	0							0	1	1	1	0	1	0	1	0
841	0	2011-03-14	6	2	0	2017-12-13	3	0	2017-12-13	2017-12-09	5	2017-12-14	2017-12-16	4	0	0		0					10000-15000 PHP	Tertiary	0	0	0		0	0		1	1	3	2017-12-12	1	08:00:00	Macrolides	Clarithromycin	Private Clinic	1	0	1	0	0	0	0	1	1
842	0	2005-08-21	12	2	1	2017-12-13	3	0	2017-12-13	2017-12-06	8	2017-12-14	2017-12-23	11	0	66.7		1	2017-12-13	NCR	Valenzuela	1	<5000 PHP	Secondly	0	0	0		0	0		1	1	2	2017-12-12	1	20:00:00	B-lactamase Inhibitors	Co-Amoxiclav	Private Clinic	1	1	0	0	0	0	0	0	0
843	0	2008-07-16	9	2	1	2017-12-13	3	0	2017-12-13	2017-12-06	8	2017-12-14	2017-12-14	2	0	144.6		1	2017-12-13	NCR	Manila	0	10000-15000 PHP	Vocational	0	0	0		0	0		1	0	0							0	0	0	0	0	0	0	0	0
844	0	2000-09-26	17	2	1	2017-12-13	3	1	2017-12-14	2017-12-09	5	2017-12-14	2017-12-17	5				1	2017-12-14	NCR	Manila	0	<5000 PHP	Secondly	0	0	1	others	0	0		1	0	0							0	0	1	0	0	0	0	0	0
845	0	2010-02-12	7	2	0	2017-12-14	3	0	2017-12-14	2017-12-09	6	2017-12-15	2017-12-17	4				1	2017-12-14	NCR	Caloocan	1	<5000 PHP	Secondly	0	0	1	lung disease	0	0		1	0	0							0	0	0	0	0	0	1	1	0
846	0	1997-12-06	20	3	1	2017-12-13	3	2	2017-12-15	2017-12-06	8	2017-12-14	2017-12-20	8	0	0		1	2017-12-15	NCR	Taguig	1	<5000 PHP	Tertiary	0	0	0		0	0		0	0	0							0	1	1	0	0	0	0	0	0
847	0	2000-12-17	16	2	0	2017-12-14	3	1	2017-12-15	2017-12-07	8	2017-12-15	2017-12-22	9	0	0		1	2017-12-15	NCR	Paranaque	1	<5000 PHP	Secondly	0	0	0		0	0		1	0	0							0	0	1	0	0	0	1	1	0
848	0	2014-07-21	3	1	0	2017-12-17	3	1	2017-12-18	2017-12-10	8	2017-12-18	2017-12-22	6	65	0		0		Region 4		2	5000-10000 PHP	Secondly	0	0	0		0	0		1	1	7	2017-12-15	2	08:00:00	Fluoroqunolones	Ciprofloxacin	Other Hospital	1	0	1	0	0	0	1	0	0
849	1	1995-05-22	22	3	0	2017-12-18	3	1	2017-12-19	2017-12-15	4	2017-12-19	2017-12-23	6	144	142		1	2017-12-19	NCR	Quezon	1	10000-15000 PHP	Tertiary	0	0	0		0	0		1	1	2	2017-12-18	0	08:00:00	Cephalosporines	Cefuroxime	Private Clinic	1	1	1	1	0	0	0	0	0
850	1	1990-09-19	27	3	1	2017-12-18	3	1	2017-12-19	2017-12-16	3	2017-12-19	2017-12-22	5	142	135		1	2017-12-19	NCR	Quezon	1	<5000 PHP	Tertiary	0	0	0		2	1	15	1	1	1	2017-12-17	1	08:00:00	Fluoroqunolones	Ciprofloxacin	Other Hospital	1	1	1	0	0	0	1	0	0
851	0	1965-05-08	52	3	1	2017-12-14	3	0	2017-12-14	2017-12-14	1	2017-12-15	2017-12-22	9	0	0		0		NCR	Manila	0	<5000 PHP	Tertiary	0	0	0		2	0		1	1	1	2017-12-13	1	08:00:00	Penicillines	Amoxicillin	Pharmacy	0	0	1	0	0	0	0	1	0
852	0	1999-11-21	18	3	1	2017-12-20	3	0	2017-12-20	2017-12-13	8	2017-12-21	2017-12-24	5	0	138.1		1	2017-12-21	NCR	Manila	0	<5000 PHP	Secondly	0	0	0		0	0		1	0	0							0	0	1	1	0	0	0	0	0
853	0	1951-05-20	66	3	0	2018-01-03	3	0	2018-01-03	2017-12-14	21	2018-01-04	2018-01-06	4	138.4	140.1		1	2018-01-03	NCR	Manila	0	5000-10000 PHP	Secondly	1	0	1	others	0	0		1	1	1	2018-01-02	1	06:00:00	Fluoroqunolones	Ciprofloxacin	Private Clinic	1	0	1	0	0	0	1	0	0
854	0	1994-03-22	23	3	1	2018-01-01	3	2	2018-01-03	2017-12-21	12	2018-01-02	2018-01-07	7	0	0		1	2018-01-03	NCR	Manila	0	<5000 PHP	Secondly	0	0	0		0	0		1	1	2	2017-12-27	5	18:00:00	B-lactamase Inhibitors	Co-Amoxiclav	Private Clinic	1	0	1	0	0	0	1	0	1
855	1	1997-03-12	20	3	0	2018-01-03	3	1	2018-01-04	2018-01-01	3	2018-01-04	2018-01-06	4	137	137		1	2018-01-04	NCR	Manila	0	<5000 PHP	Tertiary	0	0	0		0	0		1	0	0							0	0	1	0	0	1	1	0	0
856	0	1979-04-14	38	3	0	2018-01-02	3	2	2018-01-04	2017-12-27	7	2018-01-03	2018-01-06	5	139.3	138.3		1	2018-01-04	Region 3		2	<5000 PHP	Secondly	0	0	0		0	0		1	0	0							0	0	1	0	1	1	1	0	1
857	0	1980-02-11	37	3	1	2018-01-03	3	1	2018-01-04	2017-12-27	8	2018-01-04	2018-01-08	6	0	0		1	2018-01-04	NCR	Manila	0	<5000 PHP	Secondly	0	0	0		2	1	3	1	0	0							0	0	1	0	0	0	0	0	1
858	1	1994-06-19	23	3	0	2018-01-03	3	1	2018-01-04	2017-12-31	4	2018-01-04	2018-01-09	7	138	138		1	2018-01-04	NCR	Manila	0	10000-15000 PHP	Tertiary	0	0	0		0	0		1	0	0							0	0	1	0	0	0	1	0	1
859	0	2008-12-16	9	2	0	2018-01-05	3	0	2018-01-05	2017-12-29	8	2018-01-06	2018-01-07	3	135.8	137.7		1	2018-01-05	NCR	Manila	0	<5000 PHP	Secondly	0	0	0		0	0		1	0	0							0	0	1	0	0	0	1	0	0
860	0	2011-04-04	6	2	0	2018-01-05	3	0	2018-01-05	2018-01-02	4	2018-01-06	2018-01-08	4	62	1		1	2018-01-05	NCR	Manila	0	<5000 PHP	Secondly	0	0	1	others	0	0		1	0	0							0	0	0	0	0	0	1	1	0
861	1	1996-04-29	21	3	0	2018-01-08	3	0	2018-01-08	2018-01-05	4	2018-01-09	2018-01-12	5	143	141		1	2018-01-08	NCR	Malabon	1	<5000 PHP	Secondly	0	0	0		0	0		1	0	0							0	0	1	0	1	1	0	1	0
862	1	2005-10-31	12	2	1	2018-01-08	3	0	2018-01-08	2018-01-07	2	2018-01-09	2018-01-12	5	138.7	143.7		1	2018-01-08	NCR	Quezon	1	<5000 PHP	Secondly	0	0	0		0	0		1	0	0							0	0	1	0	0	0	1	1	0
863	0	2012-11-30	5	2	1	2018-01-09	3	0	2018-01-09	2018-01-08	2	2018-01-10	2018-01-19	11	66	0		0		Region 4		2	<5000 PHP	Secondly	0	0	0		0	0		1	0	0							0	0	1	0	0	1	0	0	0
864	0	2012-01-05	6	2	0	2018-01-08	3	1	2018-01-09	2018-01-07	2	2018-01-09	2018-01-11	4	0	0		0		NCR	Manila	0	<5000 PHP	Secondly	0	0	1	lung disease	0	0		1	0	0							0	1	1	0	0	1	0	0	0
865	0	1964-01-15	53	3	0	2018-01-10	3	0	2018-01-10	2018-01-07	4	2018-01-11	2018-01-16	7	143.4	144.4		0		NCR	Quezon	1	<5000 PHP	Secondly	0	0	1	lung disease;others	0	0		1	1	1	2018-01-09	1	22:00:00	Penicillines	Amoxicillin	Pharmacy	1	0	1	0	0	0	1	1	0
866	0	1964-01-22	53	3	1	2018-01-10	3	0	2018-01-10	2018-01-03	8	2018-01-10	2018-01-15	6	140.4	140.9		1	2018-01-10	NCR	Manila	0	<5000 PHP	Secondly	0	0	0		0	0		1	0	0							0	0	0	0	0	0	1	1	0
867	0	2015-10-08	2	1	1	2018-01-10	3	1	2018-01-11	2018-01-09	2	2018-01-11	2018-01-22	13	0	0		0		NCR	Quezon	1	10000-15000 PHP	Vocational	0	0	0		0	0		1	1	1	2018-01-10	0	20:00:00	Unknown	Unknown	Other Hospital	1	1	1	1	1	1	1	1	0
868	0	1993-08-20	24	3	0	2018-01-11	3	0	2018-01-11	2017-12-28	15	2018-01-15	2018-01-19	9	140.7	135.3		0		NCR	Las Pinas	1	<5000 PHP	Secondly	0	0	1	heart disease	2	1	8	1	0	0							0	0	0	0	0	1	0	0	0
869	0	1970-01-06	48	3	0	2018-01-11	3	1	2018-01-12	2018-01-05	7	2018-01-12	2018-01-16	6	135.2	67.6		1	2018-01-12	NCR	Manila	0	<5000 PHP	Secondly	0	0	1	heart disease	0	0		1	0	0							0	0	0	0	0	0	1	1	0
870	0	1960-10-01	57	3	1	2018-01-11	3	1	2018-01-12	2017-12-30	13	2018-01-12	2018-01-23	13	138.3	140		1	2018-01-12	NCR	Manila	0	<5000 PHP	Secondly	0	0	0		0	1	1	1	1	7	2018-01-10	1	23:00:00	Fluoroqunolones	Others	Private Clinic	1	0	1	0	0	0	1	1	0
871	0	2016-08-23	1	1	0	2018-01-15	3	0	2018-01-15	2018-01-12	4	2018-01-16	2018-01-20	6	0	0		0		Region 4		2	<5000 PHP	Secondly	0	0	0		0	0		1	1	1	2018-01-14	1	12:00:00	Macrolides	Azithromycin	Private Clinic	1	0	1	0	1	1	1	0	0
872	0	2013-07-03	4	1	0	2018-01-14	3	1	2018-01-15	2018-01-09	6	2018-01-15	2018-01-20	7	0	0		0		NCR	Navotas	1	<5000 PHP	Vocational	0	0	0		0	0		1	1	2	2018-01-13	1	21:00:00	B-lactamase Inhibitors	Co-Amoxiclav	Private Clinic	1	1	0	0	0	0	1	1	0
873	0	2016-08-25	1	1	0	2018-01-12	3	0	2018-01-12	2018-01-11	2	2018-01-13	2018-01-22	11	0	0		0		NCR	Paranaque	1	<5000 PHP	Secondly	0	0	0		0	0		1	0	0							0	0	1	1	0	1	1	1	0
874	0	1995-11-12	22	3	0	2018-01-15	3	0	2018-01-15	2018-01-08	8	2018-01-18	2018-02-09	26	138.2	0		0		NCR	Valenzuela	1	<5000 PHP	Secondly	0	0	0		0	0		1	1	5	2018-01-11	4	20:00:00	Cephalosporines	Cefuroxime	Private Clinic	1	1	1	0	0	0	1	1	0
875	0	1998-06-24	19	3	0	2018-01-16	3	0	2018-01-16	2018-01-15	2	2018-01-17	2018-01-19	4	141	0		1	2018-01-16	NCR	Navotas	1	<5000 PHP	Secondly	0	0	0		0	0		1	0	0							0	1	1	0	0	0	0	0	0
876	1	1989-03-26	28	3	0	2018-01-15	3	1	2018-01-16	2018-01-12	4	2018-01-16	2018-01-19	5	136.7	138.6		1	2018-01-16	NCR	Manila	0	<5000 PHP	Secondly	0	0	0		2	1	7	1	0	0							0	0	1	0	0	0	0	0	0
877	0	1969-07-15	48	3	1	2018-01-16	3	1	2018-01-17	2018-01-13	4	2018-01-17	2018-01-27	12	143.4	144		1	2018-01-17	Region 4		2	<5000 PHP	Secondly	1	0	1	lung disease;others	2	1	7	1	1	1	2018-01-12	4	21:00:00	Penicillines	Amoxicillin	Others	0	0	0	0	0	0	0	0	0
878	0	2009-10-18	8	2	0	2018-01-17	3	0	2018-01-17	2018-01-13	5	2018-01-18	2018-01-19	3	0	0		0		NCR	Manila	0	<5000 PHP	Primary	0	0	0		0	0		1	1	1	2018-01-16	1	08:00:00	Penicillines	Cloxacillin		0	0	0	0	0	1	1	1	0
879	0	2011-11-21	6	2	1	2018-01-18	3	0	2018-01-18	2018-01-11	8	2018-01-19	2018-01-22	5	66	66		0		NCR	Caloocan	1	<5000 PHP	Secondly	0	0	0		0	0		1	0	0							0	0	1	1	0	0	1	0	0
880	0	2016-06-21	1	1	1	2018-01-18	3	0	2018-01-18	2018-01-14	5	2018-01-19	2018-01-23	6	66	0		0		NCR	Manila	0	<5000 PHP	Secondly	0	0	1	lung disease;others	0	0		1	0	0							0	0	0	0	0	0	1	1	0
881	0	2009-06-06	8	2	0	2018-01-18	3	0	2018-01-18	2018-01-14	5	2018-01-19	2018-01-22	5	66	0		0		NCR	Navotas	1	<5000 PHP	Secondly	0	0	0		0	0		1	1	1	2018-01-17	1	21:00:00	Cephalosporines	Cefixime	Private Clinic	1	1	0	0	0	0	0	0	0
882	0	2002-02-12	15	2	0	2018-01-19	3	0	2018-01-19	2017-12-31	20	2018-01-20	2018-01-22	4	140	140		1	2018-01-19	NCR	Manila	0	<5000 PHP	Secondly	0	0	0		0	0		1	0	0							0	0	1	0	0	0	0	0	0
883	0	2011-09-26	6	2	0	2018-01-22	3	0	2018-01-22	2018-01-20	3	2018-01-23	2018-01-24	3	67	67		1	2018-01-22	NCR	Manila	0	10000-15000 PHP	Tertiary	0	0	0		0	0		0	0	0							0	0	1	0	0	0	1	0	0
884	0	1955-08-24	62	3	1	2018-01-22	3	0	2018-01-22	2018-01-12	11	2018-01-23	2018-02-02	12	141	141		1	2018-01-22	NCR	Manila	0	<5000 PHP	Secondly	0	0	0		0	0		1	1	7	2018-01-22	0	08:00:00	Lincomycines	Clindamycin	Others	1	0	0	0	1	1	0	0	0
885	1	1988-04-14	29	3	1	2018-01-23	3	0	2018-01-23	2018-01-17	7	2018-01-24	2018-01-25	3	141	141		1	2018-01-23	NCR	Quezon	1	5000-10000 PHP	Vocational	0	0	0		0	0		1	0	0							0	0	1	0	0	1	0	0	0
886	0	1999-08-19	18	3	1	2018-01-22	3	1	2018-01-23	2018-01-12	11	2018-01-23	2018-01-27	6	0	0		1	2018-01-23	NCR	Manila	0	<5000 PHP	Tertiary	0	0	0		0	1	4	1	1	3	2018-01-22	0	12:00:00	B-lactamase Inhibitors	Co-Amoxiclav	Private Clinic	1	0	1	0	0	0	0	0	0
887	1	2000-09-26	17	2	0	2018-01-23	3	0	2018-01-23	2018-01-19	5	2018-01-24	2018-01-27	5	140	140		1	2018-01-23	NCR	Quezon	1	<5000 PHP	Secondly	0	0	0		0	0		1	0	0							0	0	0	0	0	1	0	0	0
888	0	2016-02-05	1	1	1	2018-01-23	3	0	2018-01-23	2018-01-22	2	2018-01-24	2018-01-26	4	66	0		1	2018-01-25	NCR	Caloocan	1	<5000 PHP	Secondly	0	0	0		0	0		1	0	0							0	0	0	0	0	0	1	0	0
889	0	1998-11-09	19	3	1	2018-01-24	3	0	2018-01-24	2018-01-19	6	2018-01-25	2018-01-27	4	140	140		1	2018-01-24	NCR	Paranaque	1	<5000 PHP	Tertiary	0	0	0		0	0		1	0	0							0	1	1	0	0	0	1	1	0
890	0	1986-06-15	31	3	1	2018-01-24	3	0	2018-01-24	2018-01-21	4	2018-01-25	2018-01-27	4	141	141		1	2018-01-26	NCR	Caloocan	1	<5000 PHP	Vocational	0	0	1	others	2	1	6	1	0	0							0	0	1	0	0	0	0	0	0
891	0	2001-08-30	16	2	1	2018-01-24	3	1	2018-01-25	2018-01-22	3	2018-01-25	2018-01-28	5	141	141		1	2018-01-25	NCR	Manila	0	5000-10000 PHP	Vocational	0	0	0		2	0		1	0	0							0	0	0	0	0	0	1	0	0
892	0	2004-10-31	13	2	1	2018-01-24	3	1	2018-01-25	2018-01-15	10	2018-01-25	2018-01-28	5	140	140		1	2018-01-25	NCR	Manila	0	5000-10000 PHP	Vocational	0	0	0		0	0		1	0	0							0	0	1	0	0	0	0	0	0
893	0	2004-11-05	13	2	1	2018-01-25	3	0	2018-01-25	2018-01-20	6	2018-01-26	2018-01-30	6	138	138		1	2018-01-25	NCR	Manila	0	5000-10000 PHP	Vocational	0	0	0		0	0		1	1	1	2018-01-24	1	21:00:00	Cephalosporines	Cefuroxime	Private Clinic	1	0	1	0	0	0	0	0	0
894	0	2000-10-11	17	2	0	2018-01-26	3	0	2018-01-26	2018-01-19	8	2018-01-27	2018-02-02	8	141	141		1	2018-01-26	NCR	Paranaque	1	<5000 PHP	Secondly	0	0	1	others	0	0		1	0	0							0	0	1	0	0	0	1	1	0
895	0	2003-01-10	15	2	1	2018-01-26	3	0	2018-01-26	2018-01-22	5	2018-01-27	2018-02-07	13	141	141		1	2018-01-26	NCR	Paranaque	1	<5000 PHP	Tertiary	0	0	0		0	0		1	0	0							0	0	1	0	0	0	1	1	0
896	0	2004-07-16	13	2	1	2018-01-28	3	1	2018-01-29	2018-01-26	3	2018-01-31	2018-01-31	4	140	140		1	2018-01-29	NCR	Valenzuela	1	<5000 PHP	Primary	0	0	1	others	0	0		1	0	0							0	0	1	0	0	0	1	1	0
897	0	2002-09-06	15	2	1	2018-01-28	3	1	2018-01-29	2018-01-15	14	2018-01-29	2018-01-31	4	140	140		1	2018-01-29	NCR	Manila	0	<5000 PHP	Secondly	0	0	1	others	0	0		1	0	0							0	0	1	0	0	0	1	0	0
898	0	2009-11-11	8	2	0	2018-01-28	3	1	2018-01-29	2018-01-27	2	2018-01-29	2018-02-01	5	0	0		0		NCR	Caloocan	1	15000-20000 PHP	Tertiary	0	0	1	others	0	0		1	1	1	2018-01-27	1	23:00:00	Unknown	Unknown	Other Hospital	1	1	0	0	0	1	0	0	0
899	0	2014-05-16	3	1	1	2018-01-29	3	0	2018-01-29	2018-01-25	5	2018-01-30	2018-02-02	5	6	1		1	2018-01-29	NCR	Manila	0	5000-10000 PHP	Vocational	0	0	0		0	0		1	0	0							0	0	1	0	0	0	0	0	0
900	0	1991-01-22	27	3	1	2018-01-30	3	0	2018-01-30	2018-01-27	4	2018-01-31	2018-02-02	4	0	0		0	2018-01-31	NCR	Manila	0	<5000 PHP	Secondly	0	0	0		0	0		1	1	1	2018-01-29	1	22:00:00	Unknown	Unknown	Private Clinic	1	0	1	0	0	0	0	0	0
901	1	2005-09-18	12	2	0	2018-01-30	3	0	2018-01-30	2018-01-30	1	2018-01-31	2018-02-01	3	140	140		0		NCR	Manila	0	<5000 PHP	Secondly	0	0	1	others	0	0		0	0	0							0	0	1	0	0	0	1	0	0
902	0	1999-12-28	18	3	0	2018-01-30	3	0	2018-01-30	2018-01-16	15	2018-02-02	2018-02-07	9	139	139		1	2018-01-30	NCR	Malabon	1	<5000 PHP	Secondly	0	0	0		0	0		1	1	7	2018-01-18	12		B-lactamase Inhibitors	Co-Amoxiclav	Private Clinic	1	1	1	0	0	0	1	1	0
903	0	2006-02-25	11	2	0	2018-01-30	3	0	2018-01-30	2018-01-23	8	2018-01-31	2018-02-02	4	139	139		1	2018-01-30	NCR	Caloocan	1	<5000 PHP	Secondly	0	0	1	others	0	0		1	0	0							0	0	1	0	0	0	0	0	0
904	1	2006-02-20	11	2	1	2018-01-30	3	0	2018-01-30	2018-01-29	2	2018-01-31	2018-02-01	3	139	1		1	2018-01-30	NCR	Manila	0	<5000 PHP	Secondly	0	0	1	others	0	0		1	0	0							0	0	1	1	0	0	0	0	0
905	0	1980-01-14	38	3	1	2018-01-30	3	0	2018-01-30	2018-01-23	8	2018-01-31	2018-02-10	12	140	140		1	2018-01-30	NCR	Valenzuela	1	<5000 PHP	Secondly	0	0	0		2	0		1	0	0							0	0	1	1	0	0	1	0	0
906	0	1980-01-14	38	3	1	2018-01-30	3	1	2018-01-31	2018-01-25	6	2018-01-31	2018-02-03	5	139	139		1	2018-01-31	NCR	Manila	0	5000-10000 PHP	Vocational	0	0	0		0	0		1	0	0							0	1	1	0	0	0	0	0	0
907	0	2003-05-20	14	2	1	2018-01-30	3	1	2018-01-31	2018-01-21	10	2018-03-18	2018-03-23	53	0	0		1	2018-01-31	NCR	Quezon	1	<5000 PHP	Secondly	0	0	1	others	0	0		1	1	2	2018-01-29	1	08:00:00	Cephalosporines	Cefuroxime	Private Clinic	1	0	1	1	0	0	1	1	0
908	0	1994-11-07	23	3	1	2018-01-31	3	0	2018-01-31	2018-01-28	4	2018-02-01	2018-02-04	5	140	140		1	2018-01-31	Region 4		2	<5000 PHP	Vocational	0	0	0		0	0		1	1	2	2018-01-30	1	08:00:00	Penicillines	Amoxicillin	Pharmacy	1	1	0	0	0	0	0	0	0
909	0	2015-11-14	2	1	1	2018-02-01	3	0	2018-02-01	2018-01-27	6	2018-02-02	2018-02-05	5	65	1		1	2018-02-02	Region 4		2	<5000 PHP	Secondly	0	0	0		0	0		1	1	1	2018-01-31	1	06:00:00	B-lactamase Inhibitors	Co-Amoxiclav	Public health center	1	0	0	0	0	0	1	1	0
910	0	2009-09-24	8	2	1	2018-02-01	3	0	2018-02-01	2018-01-29	4	2018-02-03	2018-02-20	20	0	0		0		Region 4		2	<5000 PHP	Secondly	0	0	0		0	0		1	1	2	2018-01-30	2	21:00:00	Unknown	Unknown	Private Clinic	1	1	1	0	0	0	1	0	0
911	0	1996-10-22	21	3	1	2018-02-02	3	0	2018-02-02	2018-01-31	3	2018-02-03	2018-02-16	15	0	0		1	2018-02-05	NCR	Quezon	1	5000-10000 PHP	Vocational	0	0	0		0	0		1	1	1	2018-02-01	1	22:00:00	Cephalosporines	Ceftriaxone	Other Hospital	1	1	1	1	1	1	1	1	0
912	0	2005-12-15	12	2	0	2018-02-02	3	0	2018-02-02	2018-01-31	3	2018-02-03	2018-02-07	6	138	138		1	2018-02-02	NCR	Manila	0	<5000 PHP	Secondly	0	0	1	others	0	0		1	0	0							0	0	0	0	0	0	1	0	0
913	0	1956-07-15	61	3	0	2018-02-04	3	1	2018-02-05	2018-02-01	4	2018-02-05	2018-02-12	9	0	0		0		NCR	Mandaluyong	1	<5000 PHP	Secondly	1	0	1	diabetes;others	0	0		1	1		2018-02-03	1	22:00:00	Cephalosporines	Ceftriaxone	Other Hospital	1	1	1	1	0	1	0	1	0
914	0	1991-02-15	26	3	1	2018-02-05	3	0	2018-02-05	2018-02-01	5	2018-02-06	2018-02-09	5	141	141		1	2018-02-05	NCR	Navotas	1	5000-10000 PHP	Vocational	0	0	0		2	1	9	1	0	0							0	0	0	0	0	1	1	0	0
916	0	2005-08-20	12	2	0	2018-02-04	3	1	2018-02-05	2018-02-01	4	2018-02-05	2018-02-06	3	140	140		1	2018-02-05	Region 4		2	<5000 PHP	Secondly	0	0	1	others	0	0		1	1	2	2018-02-04	0	21:00:00	Penicillines	Amoxicillin	Public health center	1	0	0	0	0	0	0	0	0
917	0	2014-03-12	3	1	1	2018-02-05	3	0	2018-02-05	2018-02-03	3	2018-02-06	2018-02-07	3	0	0		0		Region 4		2	<5000 PHP	Vocational	0	0	0		0	0		1	1	1	2018-02-04	1	12:00:00	B-lactamase Inhibitors	Co-Amoxiclav	Public health center	1	1	0	0	0	0	1	0	0
918	1	1980-11-17	37	3	0	2018-02-05	3	1	2018-02-06	2018-02-01	5	2018-02-06	2018-02-10	6	139	139		1	2018-02-06	Region 4		2	<5000 PHP	Secondly	0	0	1	others	0	0		1	1	3	2018-02-05	0	23:00:00	Fluoroqunolones	Levofloxacin	Private Clinic	1	0	1	0	0	0	0	0	0
919	1	1996-02-09	21	3	0	2018-02-06	3	0	2018-02-06	2018-01-31	7	2018-02-07	2018-02-09	4	139	139		1	2018-02-06	NCR	Manila	0	<5000 PHP	Secondly	0	0	0		2	0		0	0	0							0	0	0	0	0	0	0	0	0
920	0	1949-03-09	68	3	1	2018-02-05	3	1	2018-02-06	2018-02-02	4	2018-02-06	2018-02-13	9	0	0		0		NCR	Malabon	1	<5000 PHP	Secondly	0	0	0		1	1	4	1	1	1	2018-02-04	1	21:00:00	Penicillines	Amoxicillin	Public health center	1	1	1	0	1	1	1	1	0
921	0	1992-07-02	25	3	0	2018-02-07	3	0	2018-02-07	2018-02-02	6	2018-02-08	2018-02-11	5	141	141		0		NCR	Caloocan	1	<5000 PHP	Secondly	0	0	1	others	0	0		1	0	0							0	0	1	0	1	1	1	1	0
922	0	1987-07-23	30	3	0	2018-02-07	3	0	2018-02-07	2018-02-03	5	2018-02-08	2018-02-10	4	139	139		0		NCR	Manila	0	<5000 PHP	Secondly	0	0	1	others	0	1	12	1	1	1	2018-02-05	2		Penicillines	Amoxicillin	Private Clinic	1	0	1	0	1	1	1	1	0
924	0	2008-06-04	9	2	0	2018-02-07	3	0	2018-02-07	2018-02-03	5	2018-02-08	2018-02-10	4	0	0		1	2018-02-07	NCR	Makati	1	10000-15000 PHP	Tertiary	0	0	1	others	0	0		1	0	0							0	1	0	0	1	1	0	0	0
925	0	2003-12-03	14	2	0	2018-02-07	3	0	2018-02-07	2018-02-01	7	2018-02-09	2018-02-13	7	139	140		1	2018-02-07	NCR	Caloocan	1	<5000 PHP	Secondly	0	0	0		0	0		1	1	5	2018-02-07	0	09:00:00	B-lactamase Inhibitors	Co-Amoxiclav	Private Clinic	1	0	1	0	0	0	0	0	0
926	0	1938-02-06	80	3	0	2018-02-08	3	0	2018-02-08	2018-02-04	5	2018-02-09	2018-02-12	5	138	0		0		NCR	Caloocan	1	<5000 PHP	Secondly	1	0	1	diabetes;others	0	0		1	1	1	2018-02-07	1	08:00:00	B-lactamase Inhibitors	Co-Amoxiclav	Private Clinic	1	0	1	1	0	0	1	1	0
928	0	1994-01-23	24	3	1	2018-02-08	3	1	2018-02-09	2018-02-03	6	2018-02-09	2018-02-18	11	0	0		1	2018-02-09	NCR	Navotas	1	<5000 PHP	Secondly	0	0	0		2	1	7	1	0	0							0	1	1	0	0	0	1	0	0
929	0	1971-05-06	46	3	1	2018-02-08	3	1	2018-02-09	2018-02-02	7	2018-02-09	2018-02-13	6	0	0		1	2018-02-09	NCR	Manila	0	<5000 PHP	Vocational	0	0	0		0	0		1	0	0							0	0	1	0	0	0	0	0	0
930	0	2008-10-27	9	2	1	2018-02-08	3	1	2018-02-09	2018-02-05	4	2018-02-09	2018-02-22	15	0	0		1	2018-02-09	NCR	Quezon	1	<5000 PHP	Secondly	0	0	0		0	0		1	1	3	2018-02-08	0	03:00:00	B-lactamase Inhibitors	Co-Amoxiclav	Private Clinic	1	0	0	0	0	0	0	1	0
931	0	1973-01-11	45	3	1	2018-02-12	3	0	2018-02-12	2018-02-07	6	2018-02-13	2018-02-14	3	140	140		1	2018-02-12	NCR	Manila	0	5000-10000 PHP	Secondly	0	0	0		2	1	1	1	0	0							0	1	1	0	0	0	0	1	0
932	0	2002-11-13	15	2	0	2018-02-12	3	0	2018-02-12	2018-02-09	4	2018-02-13	2018-02-17	6	139	139		1	2018-02-13	NCR	Manila	0	5000-10000 PHP	Secondly	0	0	0		0	0		1	0	0							0	0	1	0	0	0	1	0	0
933	0	1998-06-26	19	3	1	2018-02-12	3	1	2018-02-13	2018-02-06	7	2018-02-13	2018-02-22	11	139	139		1	2018-02-13	NCR	Malabon	1	<5000 PHP	Secondly	0	0	0		2	1	6	1	1	7	2018-02-12	0	17:00:00	Cephalosporines	Cefixime	Private Clinic	1	0	1	0	0	0	1	1	0
934	1	2005-01-21	13	2	1	2018-02-12	3	1	2018-02-13	2018-02-11	2	2018-02-13	2018-02-16	5	139	139		1	2018-02-13	NCR	Caloocan	1	<5000 PHP	Secondly	0	0	1	others	0	0		1	1	1	2018-02-12	0	12:00:00	Penicillines	Amoxicillin	Private Clinic	1	0	1	0	0	0	1	0	0
935	1	2001-03-24	16	2	1	2018-02-12	3	1	2018-02-13	2018-02-10	3	2018-02-13	2018-02-16	5	139	139		1	2018-02-13	NCR	Manila	0	5000-10000 PHP	Secondly	0	0	0		0	0		1	0	0							0	1	1	0	0	0	0	0	0
936	0	2002-09-11	15	2	1	2018-02-14	3	0	2018-02-14	2018-02-10	5	2018-02-15	2018-02-21	8	138	0		1	2018-02-14	NCR	Caloocan	1	10000-15000 PHP	Tertiary	0	0	0		0	0		1	1	2	2018-02-13	1	23:00:00	Penicillines	Cloxacillin	Public health center	1	1	1	0	0	0	0	1	0
937	0	2012-11-23	5	2	0	2018-02-14	3	0	2018-02-14	2018-02-07	8	2018-02-15	2018-02-16	3	64	0		1	2018-02-14	NCR	Manila	0	<5000 PHP	Secondly	0	0	0		0	0		0	0	0							0	1	0	0	0	0	1	0	0
938	0	2015-04-10	2	1	0	2018-02-15	3	0	2018-02-15	2018-02-11	5	2018-02-16	2018-02-20	6	64	0		0		NCR	Caloocan	1	<5000 PHP	Vocational	0	0	0		0	0		1	0	0							0	0	1	0	0	0	1	1	0
939	0	2000-10-08	17	2	1	2018-02-15	3	0	2018-02-15	2018-02-06	10	2018-02-16	2018-02-19	5	140	140		1	2018-02-15	NCR	Manila	0	<5000 PHP	Secondly	0	0	0		2	0		1	0	0							0	0	1	0	0	0	0	0	0
940	0	1935-06-14	82	3	1	2018-02-15	3	0	2018-02-15	2018-02-01	15	2018-02-17	2018-03-01	15	140	140		1	2018-02-19	NCR	Manila	0	<5000 PHP	Secondly	0	0	0		2	1	3	1	1	14	2018-02-14	1	23:00:00	Penicillines	Amoxicillin	Public health center	0	0	0	0	1	1	0	0	0
941	0	2010-09-14	7	2	0	2018-02-19	3	0	2018-02-19	2018-02-17	3	2018-02-20	2018-02-23	5	0	0		0		NCR	Quezon	1	5000-10000 PHP	Secondly	0	0	0		0	0		1	0	0							0	1	0	0	0	0	0	0	0
942	0	2011-08-09	6	2	0	2018-02-19	3	0	2018-02-19	2018-02-16	4	2018-02-20	2018-02-23	5	66	66		0		NCR	Valenzuela	1	5000-10000 PHP	Secondly	0	0	0		0	0		1	0	0							0	0	1	0	1	1	0	0	0
943	1	1991-11-21	26	3	1	2018-02-20	3	0	2018-02-20	2018-02-17	4	2018-02-21	2018-02-24	5	140	140		1	2018-02-20	NCR	Valenzuela	1	<5000 PHP	Secondly	0	0	1	others	2	1	1	1	0	0							0	1	1	0	0	0	1	0	0
944	1	1997-08-07	20	3	1	2018-02-19	3	1	2018-02-20	2018-02-15	5	2018-02-20	2018-02-23	5	140	140		1	2018-02-20	Region 4		2	<5000 PHP	Secondly	0	0	0		2	0		1	1	3	2018-02-19	0	16:00:00	Co-trimo	Co-trimoxazole	Other Hospital	1	0	1	0	0	1	0	0	0
945	0	2003-04-08	14	2	0	2018-02-20	3	1	2018-02-21	2018-02-13	8	2018-02-21	2018-02-24	5	138	138		1	2018-02-21	Region 4		2	5000-10000 PHP	Tertiary	0	0	0		0	0		1	0	0							0	1	1	0	1	1	0	0	0
946	0	2011-02-19	7	2	0	2018-02-20	3	1	2018-02-21	2018-02-16	5	2018-02-21	2018-02-25	6	63.3	0		0		NCR	Pasig	1	<5000 PHP	Secondly	0	0	0		0	0		1	0	0							0	0	1	0	1	1	1	1	0
947	0	1995-02-27	22	3	1	2018-02-21	3	1	2018-02-22	2018-02-16	6	2018-02-22	2018-02-28	8	139	139		1	2018-02-22	NCR	Manila	0	5000-10000 PHP	Secondly	0	0	0		2	1	6	1	0	0							0	0	1	0	0	0	1	0	0
948	0	2014-07-14	3	1	1	2018-02-21	3	1	2018-02-22	2018-02-14	8	2018-02-23	2018-03-03	11	0	0		0		NCR	Manila	0	<5000 PHP	Secondly	0	0	0		0	0		0	0	0							0	0	0	0	0	1	1	1	0
949	0	2006-01-05	12	2	0	2018-02-21	3	1	2018-02-22	2018-02-18	4	2018-02-22	2018-03-10	18	0	0		0		NCR	Quezon	1	<5000 PHP	Secondly	0	0	0		0	0		1	0	0							0	0	1	0	0	0	0	0	0
950	0	2009-09-29	8	2	0	2018-02-22	3	1	2018-02-23	2018-02-19	4	2018-02-23	2018-02-28	7	137	137		1	2018-02-23	NCR	Manila	0	<5000 PHP	Secondly	0	0	0		0	0		1	0	0							0	1	1	0	0	1	0	0	0
951	0	2012-11-04	5	2	1	2018-02-23	3	0	2018-02-23	2018-02-13	11	2018-02-24	2018-02-27	5	66	66		1	2018-02-23	NCR	Manila	0	<5000 PHP	Secondly	0	0	0		0	0		1	1	5	2018-02-23	0	08:00:00	Cephalosporines	Cephalexin	Private Clinic	1	0	0	0	0	0	0	0	0
952	0	2004-06-06	13	2	1	2018-02-23	3	0	2018-02-23	2018-02-19	5	2018-02-25	2018-03-05	11	140	140		1	2018-02-26	Region 3		2	15000-20000 PHP	Tertiary	1	0	1	others	0	0		1	1	1	2018-02-23	0	08:00:00	Cephalosporines	Ceftriaxone	Other Hospital	1	1	1	0	0	0	0	0	0
953	0	1992-01-16	26	3	1	2018-02-25	3	1	2018-02-26	2018-02-06	20	2018-02-26	2018-03-05	9	0	0		1	2018-02-26	NCR	Makati	1	<5000 PHP	Primary	0	0	0		2	0		1	0	0							0	1	0	1	0	0	1	0	0
954	0	2011-09-30	6	2	0	2018-02-25	3	1	2018-02-26	2018-02-18	8	2018-02-26	2018-03-02	6	66	0		1	2018-02-26	NCR	Manila	0	>20000 PHP	Tertiary	0	0	0		0	0		1	1	2	2018-02-24	1	22:00:00	Cephalosporines	Cefuroxime	Private Clinic	1	0	0	0	0	0	1	0	0
955	1	1995-09-23	22	3	1	2018-02-26	3	1	2018-02-27	2018-02-22	5	2018-02-28	2018-03-04	7	139	139		0		NCR	Quezon	1	<5000 PHP	Secondly	0	0	0		0	0		1	0	0							0	0	0	0	0	0	0	1	0
956	1	1984-04-03	33	3	1	2018-02-26	3	1	2018-02-27	2018-02-19	8	2018-02-27	2018-03-07	10	140	140		1	2018-02-27	NCR	Manila	0	10000-15000 PHP	Tertiary	0	0	0		2	0		1	0	0							0	0	1	0	0	1	1	0	0
957	0	2011-10-12	6	2	0	2018-02-26	3	1	2018-02-27	2018-02-19	8	2018-02-27	2018-03-07	10	0	0		1	2018-02-27	NCR	Manila	0	<5000 PHP	Secondly	0	0	0		0	0		1	1	1	2018-02-24	2	10:00:00	Cephalosporines	Cefuroxime	Other Hospital	1	1	1	0	0	1	1	0	0
958	0	1971-01-27	47	3	1	2018-02-28	3	0	2018-02-28	2018-02-08	21	2018-03-02	2018-03-13	14	141	0		0		NCR	Las Pinas	1	<5000 PHP	Primary	0	0	0		2	1	3	1	1	7				B-lactamase Inhibitors	Co-Amoxiclav	Pharmacy	1	0	1	1	0	0	1	1	0
959	0	1967-04-01	50	3	1	2018-02-28	3	0	2018-02-28	2018-02-22	7	2018-02-28	2018-03-04	5	139	140		1	2018-02-28	NCR	Quezon	1	5000-10000 PHP	Secondly	0	0	0		2	0		1	0	0							0	0	1	0	0	1	0	0	0
960	0	1973-07-10	44	3	1	2018-03-01	3	0	2018-03-01	2018-02-12	18	2018-03-02	2018-03-06	6	138	141		1	2018-03-05	NCR	Manila	0	<5000 PHP	Primary	0	0	0		2	1	30	1	1	1	2018-02-24	5	08:00:00	Unknown	Unknown	Other Hospital	1	1	0	0	0	0	1	0	0
961	0	1961-08-03	56	3	0	2018-03-01	3	0	2018-03-01	2018-02-23	7	2018-03-02	2018-03-13	13	137	140		0		NCR	Manila	0	<5000 PHP	Secondly	1	0	1	diabetes	0	0		0	0	0							0	0	0	0	0	0	0	0	0
962	0	1967-07-22	50	3	0	2018-03-01	3	0	2018-03-01	2018-02-28	2	2018-03-02	2018-03-02	2	140	140		1	2018-03-01	NCR	Navotas	1	<5000 PHP	Secondly	0	0	0		0	0		0	0	0							0	1	1	0	0	0	1	1	0
963	0	2014-10-11	3	1	1	2018-03-02	3	0	2018-03-02	2018-02-21	10	2018-03-04	2018-03-08	7	64	1		0		NCR	Manila	0	<5000 PHP	Secondly	0	0	1	others	0	0		1	1	3	2018-03-02	0	05:00:00	Penicillines	Amoxicillin	Public health center	1	0	0	0	0	0	1	1	0
964	0	1994-07-20	23	3	1	2018-03-02	3	0	2018-03-02	2018-02-23	8	2018-03-04	2018-03-06	5	0	0		1	2018-03-02	NCR	Valenzuela	1	5000-10000 PHP	Vocational	0	0	0		2	0		1	0	0							0	1	0	0	0	0	0	0	0
965	0	1991-09-03	26	3	0	2018-03-03	3	2	2018-03-05	2018-03-03	1	2018-03-05	2018-03-05	3	0	0		1	2018-03-05	Region 4		2	<5000 PHP	Secondly	0	0	0		0	0		1	1								0	1	1	1	0	0	0	1	0
966	0	1976-04-17	41	3	1	2018-03-03	3	2	2018-03-05	2018-02-27	5	2018-03-05	2018-03-07	5	0	0		1	2018-03-05	NCR	Caloocan	1	<5000 PHP	Secondly	0	0	0		2	1	15	1	1	2	2018-03-03	0	08:00:00	Unknown	Unknown		9	0	1	0	0	0	0	1	0
967	1	1990-12-03	27	3	1	2018-03-05	3	1	2018-03-06	2018-03-02	4	2018-03-05	2018-03-08	4	140	140		1	2018-03-06	NCR	Caloocan	1	5000-10000 PHP	Secondly	0	0	0		2	0		1	1	3	2018-03-05	0	08:00:00	Fluoroqunolones	Ciprofloxacin	Other Hospital	1	0	0	0	1	1	0	0	0
968	1	1992-09-04	25	3	0	2018-03-05	3	1	2018-03-06	2018-03-02	4	2018-03-06	2018-03-09	5	140	140		1	2018-03-06	Region 4		2	<5000 PHP	Tertiary	0	0	0		0	0		1	1	2				Cephalosporines	Cephalexin	Other Hospital	1	1	1	0	0	1	0	0	0
969	0	2006-04-26	11	2	0	2018-03-07	3	0	2018-03-07	2018-03-05	3	2018-03-07	2018-03-12	6	139	139		1	2018-03-07	NCR	Manila	0	5000-10000 PHP	Secondly	0	0	1	others	0	0		1	1	2	2018-03-07	0	07:00:00	Penicillines	Amoxicillin	Public health center	1	0	1	0	0	0	1	0	0
970	0	2007-01-23	11	2	1	2018-03-07	3	0	2018-03-07	2018-03-02	6	2018-03-09	2018-03-26	20	137	137		0		Region 4		2	<5000 PHP	Secondly	0	0	0		0	0		1	0	0							0	0	1	1	0	0	0	0	0
971	0	2007-02-26	11	2	1	2018-03-08	3	0	2018-03-08	2018-03-01	8	2018-03-09	2018-03-16	9	137	1		1	2018-03-08	NCR	Valenzuela	1	15000-20000 PHP	Tertiary	0	0	0		0	0		1	0	0							0	0	1	0	0	0	1	0	0
972	0	2008-01-12	10	2	1	2018-03-08	3	0	2018-03-08	2018-03-06	3	2018-03-09	2018-03-12	5	138	137		0		NCR	Manila	0	<5000 PHP	Secondly	0	0	1	others	0	0		1	0	0							0	0	1	0	1	1	0	0	0
973	0	1997-01-04	21	3	1	2018-03-08	3	1	2018-03-09	2018-02-22	15	2018-03-09	2018-03-15	8	0	0		1	2018-03-09	Region 4		2	5000-10000 PHP	Tertiary	0	0	1	others	0	0		1	1	1	2018-03-07	1	07:00:00	B-lactamase Inhibitors	Co-Amoxiclav	Other Hospital	1	1	1	0	0	0	1	1	0
974	0	2002-05-13	15	2	1	2018-03-09	3	0	2018-03-09	2018-03-06	4	2018-03-10	2018-03-13	5	136	140		1	2018-03-09	NCR	Manila	0	<5000 PHP	Secondly	0	0	1	others	0	0		1	0	0							0	0	1	1	0	0	1	0	0
975	0	2004-09-01	13	2	1	2018-03-12	3	0	2018-03-12	2018-03-06	7	2018-03-13	2018-03-16	5	141	140		1	2018-03-12	Region 4		2	10000-15000 PHP	Vocational	0	0	0		0	0		1	0	0							0	1	1	0	1	1	0	0	0
976	0	2013-11-03	4	1	1	2018-03-12	3	0	2018-03-12	2018-03-08	5	2018-03-13	2018-03-19	8	65	1		0		NCR	Manila	0	<5000 PHP	Secondly	0	0	0		0	0		1	0	0							0	0	0	0	0	0	1	0	0
977	0	2014-11-20	3	1	0	2018-03-12	3	0	2018-03-12	2018-03-09	4	2018-03-13	2018-03-28	17	65	0		1	2018-03-13	NCR	San Juan	1	<5000 PHP	Secondly	0	0	0		0	0		1	0	0							0	0	0	0	0	0	1	1	0
978	1	2002-12-22	15	2	0	2018-03-13	3	0	2018-03-13	2018-03-11	3	2018-03-14	2018-03-17	5	141	140		1	2018-03-15	NCR	Quezon	1	<5000 PHP	Secondly	0	0	1	others	0	0		1	0	0							0	0	1	0	0	0	1	1	0
979	1	2002-04-24	15	2	0	2018-03-13	3	0	2018-03-13	2018-03-09	5	2018-03-14	2018-03-20	8	141	140		1	2018-03-13	NCR	Manila	0	10000-15000 PHP	Tertiary	0	0	0		0	0		1	0	0							0	0	1	0	0	0	0	0	0
980	0	2006-07-20	11	2	0	2018-03-14	3	0	2018-03-14	2018-03-02	13	2018-03-17	2018-03-20	7	0	1		1	2018-03-15	NCR	Malabon	1	<5000 PHP	Vocational	0	0	1	others	0	0		1	1	2	2018-03-13	1	23:00:00	Cephalosporines	Cefuroxime	Other Hospital	1	0	1	0	0	0	0	0	1
981	0	2016-08-09	1	1	1	2018-03-15	3	0	2018-03-15	2018-03-03	13	2018-03-16	2018-03-19	5	65	1		1	2018-03-19	NCR	Manila	0	5000-10000 PHP	Tertiary	0	0	1	others	0	0		1	0	0							0	0	0	1	0	0	1	1	0
982	0	1995-05-03	22	3	0	2018-03-16	3	0	2018-03-16	2018-03-03	14	2018-03-17	2018-03-20	5	141	141		1	2018-03-16	NCR	Manila	0	<5000 PHP	Tertiary	0	0	1	others	0	0		1	0	0							0	0	1	0	0	0	1	0	0
983	0	1985-11-08	32	3	1	2018-03-15	3	0	2018-03-15	2018-03-08	8	2018-05-16	2018-05-21	68	138	141		1	2018-03-15	NCR	Manila	0	10000-15000 PHP	Tertiary	0	0	0		2	0		1	1	1	2018-03-09	6	21:00:00	B-lactamase Inhibitors	Co-Amoxiclav	Private Clinic	1	1	1	0	0	0	0	0	0
984	0	1991-12-26	26	3	1	2018-03-16	3	0	2018-03-16	2018-03-09	8	2018-03-20	2018-04-13	29	141	141		1	2018-03-16	Region 4		2	<5000 PHP	Secondly	0	0	0		2	1	6	1	1					Unknown	Unknown		1	1	1	1	0	0	0	0	0
985	0	2008-08-12	9	2	1	2018-03-16	3	0	2018-03-16	2018-03-09	8	2018-03-17	2018-03-22	7	0	0		1	2018-03-16	NCR	Manila	0	<5000 PHP	Secondly	0	0	0		0	0		1	0	0							0	0	0	0	0	0	0	0	0
986	0	2015-11-17	2	1	0	2018-03-19	3	0	2018-03-19	2018-03-15	5	2018-03-20	2018-03-26	8	64	0		0		NCR	Manila	0	<5000 PHP	Secondly	0	0	0		0	0		1	1	4	2018-03-18	1	18:00:00	Cephalosporines	Cefuroxime	Public health center	1	1	0	1	0	1	1	1	0
987	1	1999-05-01	18	3	1	2018-03-19	3	1	2018-03-20	2018-03-15	5	2018-03-20	2018-03-22	4	138	142		1	2018-03-20	NCR	Malabon	1	<5000 PHP	Secondly	0	0	0		2	1	15	1	0	0							0	0	1	0	0	0	1	0	0
988	1	1998-07-16	19	3	1	2018-03-20	3	0	2018-03-20	2018-03-17	4	2018-03-21	2018-03-27	8	140	140		0		NCR	Manila	0	<5000 PHP	Secondly	0	0	0		2	0		1	0	0							0	0	1	0	0	0	0	0	0
989	0	1994-12-12	23	3	1	2018-03-21	3	0	2018-03-21	2018-03-11	11	2018-03-23	2018-03-25	5	140	140		1	2018-03-21	NCR	Manila	0	<5000 PHP	Secondly	0	0	0		2	1	10	1	0	0							0	0	1	1	0	0	0	0	0
990	0	1965-10-24	52	3	1	2018-03-21	3	0	2018-03-21	2018-03-14	8	2018-03-21	2018-03-21	1	138	1		0		NCR	Manila	0	<5000 PHP	Secondly	1	0	1	diabetes;others	2	1	3	1	0	0							0	0	1	0	0	0	1	1	0
991	0	2003-04-18	14	2	1	2018-03-22	3	0	2018-03-22	2018-03-19	4	2018-03-23	2018-03-25	4	140	140		1	2018-03-22	NCR	Manila	0	<5000 PHP	Secondly	0	0	1	others	0	0		1	1	2	2018-03-21	1	23:00:00	Fluoroqunolones	Ofloxacin	Pharmacy	1	0	1	0	0	0	1	1	0
992	0	2015-08-21	2	1	1	2018-03-22	3	0	2018-03-22	2018-03-15	8	2018-03-24	2018-03-28	7	66	1		1	2018-03-23	NCR	Manila	0	10000-15000 PHP	Tertiary	0	0	0		0	0		1	1	1	2018-03-19	3	10:00:00	Cephalosporines	Cefixime	Private Clinic	1	0	0	0	0	1	0	0	0
993	0	2017-01-20	1	1	1	2018-03-23	3	0	2018-03-23	2018-03-16	8	2018-03-24	2018-03-29	7	66	0		0		NCR	Manila	0	<5000 PHP	Vocational	0	0	0		0	0		1	1	2	2018-03-23	0	09:00:00	Cephalosporines	Cephalexin	Private Clinic	1	0	0	0	0	1	1	1	0
995	0	1984-10-05	33	3	1	2018-03-26	3	1	2018-03-27	2018-03-19	8	2018-03-27	2018-03-30	5	0	0		1	2018-03-27	NCR	Manila	0	10000-15000 PHP	Vocational	0	0	0		2	1	8	1	0	0							0	0	1	0	0	1	1	0	0
996	0	2003-11-10	14	2	0	2018-04-02	3	0	2018-04-02	2018-03-29	5	2018-04-04	2018-04-04	3	137	137		0		NCR	Navotas	1	<5000 PHP	Vocational	0	0	1	lung disease;others	0	0		1	0	0							0	0	0	0	0	0	1	0	0
997	0	1992-11-20	25	3	1	2018-04-03	3	0	2018-04-03	2018-03-30	5	2018-04-04	2018-04-08	6	137	137		1	2018-04-03	NCR	Manila	0	10000-15000 PHP	Tertiary	0	0	0		2	0		1	0	0							0	1	1	0	0	0	0	0	0
998	0	2007-03-28	11	2	1	2018-04-03	3	0	2018-04-03	2018-03-29	6	2018-04-04	2018-04-20	18	140	140		0		NCR	Paranaque	1	<5000 PHP	Secondly	0	0	0		0	0		1	0	0							0	0	0	0	0	0	1	1	0
999	0	2014-10-25	3	1	1	2018-04-03	3	0	2018-04-03	2018-03-31	4	2018-04-04	2018-04-14	12	67	67		0		NCR	Manila	0	5000-10000 PHP	Vocational	0	0	0		0	0		1	1	1	2018-04-03	0	04:00:00	B-lactamase Inhibitors	Co-Amoxiclav	Other Hospital	1	1	0	0	0	0	1	0	0
1000	1	2012-10-17	5	2	1	2018-04-03	3	1	2018-04-04	2018-03-31	4	2018-04-04	2018-04-06	4	65	1		1	2018-04-06	NCR	Manila	0	10000-15000 PHP	Vocational	0	0	1	others	0	0		1	0	0							0	0	0	0	0	1	1	0	0
1001	0	1992-02-14	26	3	1	2018-04-04	3	0	2018-04-04	2018-03-28	8	2018-04-05	2018-04-13	10	138	140		1	2018-04-05	NCR	Manila	0	10000-15000 PHP	Vocational	0	0	0		0	0		1	0	0							0	0	1	0	0	1	1	1	0
1002	0	2011-08-15	6	2	0	2018-04-04	3	1	2018-04-05	2018-03-31	5	2018-04-06	2018-04-23	20	64	64		0		NCR	Manila	0	5000-10000 PHP	Vocational	0	0	0		0	0		1	0	0							0	0	1	0	0	0	0	1	0
1003	0	2015-02-24	3	1	0	2018-04-06	3	0	2018-04-06	2018-04-01	6	2018-04-07	2018-04-12	7	64	1		0		NCR	Manila	0	<5000 PHP	none	0	0	0		0	0		1	1	2	2018-04-05	1	22:00:00	Penicillines	Amoxicillin	Pharmacy	1	0	1	0	0	0	1	0	0
1004	0	2010-03-27	8	2	0	2018-04-06	3	0	2018-04-06	2018-04-01	6	2018-04-07	2018-04-10	5	64	1		0		NCR	Manila	0	<5000 PHP	Vocational	0	0	0		0	0		1	1	2	2018-04-06	0	02:00:00	Cephalosporines	Cefaclor	Pharmacy	1	0	1	0	0	0	1	0	0
1006	0	1998-07-03	19	3	1	2018-04-09	3	1	2018-04-10	2018-04-08	2	2018-04-12	2018-04-25	17	0	0		0		NCR	Quezon	1	<5000 PHP	Tertiary	0	0	0		0	0		1	0	0							0	0	1	0	0	1	0	1	0
1007	0	1990-07-06	27	3	1	2018-04-09	3	1	2018-04-10	2018-04-07	3	2018-04-11	2018-04-24	16	0	0		1	2018-04-12	Region 3		2	5000-10000 PHP	Vocational	0	0	0		2	1	9	1	0	0							0	0	0	0	0	0	0	0	0
1008	1	1968-10-03	49	3	1	2018-04-09	3	1	2018-04-10	2018-04-03	7	2018-04-10	2018-04-13	5	140	140		1	2018-04-10	NCR	Manila	0	<5000 PHP	Primary	1	0	1	others	0	0		1	0	0							0	0	1	0	0	0	0	0	0
1009	0	2015-10-29	2	1	1	2018-04-11	3	0	2018-04-11	2018-04-06	6	2018-04-12	2018-04-20	10	62	1		0		NCR	Manila	0	<5000 PHP	Vocational	0	0	0		0	0		1	0	0							0	0	0	0	0	0	1	0	0
1010	1	1998-06-01	19	3	1	2018-04-11	3	0	2018-04-11	2018-04-06	6	2018-04-12	2018-04-16	6	140	140		1	2018-04-13	NCR	Manila	0	<5000 PHP	Secondly	0	0	0		2	0		1	0	0							0	0	0	0	0	0	0	0	0
1011	0	1999-03-08	19	3	1	2018-04-12	3	0	2018-04-12	2018-04-01	12	2018-04-13	2018-04-21	10	0	0		1	2018-04-13	NCR	Malabon	1	<5000 PHP	Tertiary	0	0	1	others	0	0		1	1	1	2018-04-11	1	20:00:00	Fluoroqunolones	Ciprofloxacin	Private Clinic	1	0	0	0	0	0	1	0	0
1012	0	1990-09-01	27	3	1	2018-04-11	3	1	2018-04-12	2018-04-06	6	2018-04-12	2018-04-19	9	0	0		0		NCR	Manila	0	10000-15000 PHP	Secondly	0	0	0		0	0		1	0	0							0	1	0	0	1	1	0	0	0
1013	0	2007-11-06	10	2	0	2018-04-13	3	0	2018-04-13	2018-04-12	2	2018-04-15	2018-04-28	16	0	0		0		NCR	Valenzuela	1	10000-15000 PHP	Vocational	0	0	1	others	0	0		1	1	1	2018-04-10	3	20:00:00	Cephalosporines	Cephalexin	Private Clinic	1	1	1	1	0	1	0	1	0
1014	0	1964-06-10	53	3	0	2018-04-13	3	0	2018-04-13	2018-04-09	5	2018-04-14	2018-04-26	14	141	141		0		NCR	Manila	0	<5000 PHP	Secondly	0	0	0		0	0		1	1	2	2018-04-13	0	06:00:00	Cephalosporines	Cefuroxime	Private Clinic	1	0	0	0	1	1	0	0	0
1015	0	1999-08-29	18	3	1	2018-04-13	3	0	2018-04-13	2018-04-07	7	2018-04-14	2018-04-14	2	140	140		0		NCR	Paranaque	1	<5000 PHP	Primary	0	0	0		0	0		1	0	0							0	0	1	0	0	1	0	0	0
1016	0	2015-11-05	2	1	0	2018-04-16	3	0	2018-04-16	2018-04-14	3	2018-05-05	2018-05-29	44	68	68		0		Region 3		2	<5000 PHP	Secondly	0	0	0		0	0		1	0	0							0	1	0	0	0	0	1	1	0
1017	1	2005-12-25	12	2	1	2018-04-16	3	1	2018-04-17	2018-04-16	1	2018-04-17	2018-04-25	10	137	137		1	2018-04-17	NCR	Manila	0	5000-10000 PHP	Vocational	0	0	0		0	0		0	0	0							0	0	0	0	0	0	0	0	0
1018	1	1996-09-23	21	3	0	2018-04-17	3	0	2018-04-17	2018-04-13	5	2018-04-18	2018-04-20	4	137	136		1	2018-04-17	NCR	Caloocan	1	<5000 PHP	Secondly	0	0	0		2	0		1	0	0							0	0	1	0	1	1	0	0	0
1019	0	2015-09-07	2	1	1	2018-04-17	3	0	2018-04-17	2018-04-12	6	2018-04-18	2018-04-27	11	67	67		0		NCR	Manila	0	<5000 PHP	Primary	0	0	0		0	0		1	0	0							0	0	0	0	0	0	0	0	0
1020	0	1984-09-14	33	3	1	2018-04-18	3	0	2018-04-18	2018-04-15	4	2018-04-19	2018-04-21	4	141	140		0		NCR	Paranaque	1	<5000 PHP	Primary	0	0	0		2	0		1	0	0							0	1	1	0	0	0	0	0	0
1021	0	1987-07-04	30	3	0	2018-04-18	3	0	2018-04-18	2018-04-12	7	2018-04-19	2018-04-21	4	141	141		0		NCR	Manila	0	<5000 PHP	Tertiary	0	0	1	others	2	0		1	0	0							0	0	1	0	0	0	1	0	0
1022	0	2003-10-16	14	2	0	2018-04-18	3	1	2018-04-19	2018-04-11	8	2018-04-20	2018-04-23	6	136	137		0		NCR	Quezon	1	<5000 PHP	Primary	0	0	1	others	0	0		1	0	0							0	0	0	0	0	1	1	0	0
1023	0	2006-05-08	11	2	0	2018-04-19	3	0	2018-04-19	2018-04-17	3	2018-04-20	2018-04-22	4	136	137		1	2018-04-19	NCR	Caloocan	1	10000-15000 PHP	Vocational	0	0	1	others	0	0		1	0	0							0	0	1	0	0	0	1	0	0
1024	0	1939-05-10	78	3	1	2018-04-19	3	0	2018-04-19	2018-04-11	9	2018-04-21	2018-04-29	11	135	137		0		NCR	Manila	0	<5000 PHP	Secondly	1	0	1	others	0	0		1	0	0							0	0	0	1	0	0	1	1	0
1025	0	1982-07-29	35	3	1	2018-04-20	3	0	2018-04-20	2018-04-14	7	2018-04-21	2018-04-27	8	0	145		1	2018-04-20	NCR	Makati	1	<5000 PHP	Vocational	0	0	0		2	0		1	0	0							0	1	0	0	0	0	1	1	0
1026	0	2004-12-25	13	2	1	2018-04-20	3	0	2018-04-20	2018-04-07	14	2018-04-25	2018-05-24	35	0	145.4		0		Region 4		2	<5000 PHP	Primary	0	0	0		0	0		1	1	7	2018-04-14	6	20:00:00	B-lactamase Inhibitors	Co-Amoxiclav	Public health center	1	1	1	0	0	0	1	1	0
1027	0	1999-03-24	19	3	1	2018-04-23	3	0	2018-04-23	2018-04-20	4	2018-04-24	2018-04-26	4	136	136		1	2018-04-23	NCR	Manila	0	<5000 PHP	Primary	0	0	0		2	1	1	1	0	0							0	0	0	0	0	0	0	0	0
1028	0	1994-11-09	23	3	0	2018-04-23	3	0	2018-04-23	2018-04-16	8	2018-04-25	2018-04-26	4	137	138		0		NCR	Quezon	1	15000-20000 PHP	Tertiary	0	0	0		0	0		1	0	0							0	0	1	0	0	1	1	0	0
1029	0	1964-04-17	54	3	1	2018-04-22	3	2	2018-04-24	2018-04-08	15	2018-04-24	2018-04-30	9	0	0		1	2018-04-24	NCR	Quezon	1	5000-10000 PHP	Vocational	1	0	1	diabetes	2	1	1	1	1	6	2018-04-20	2	18:00:00	Fluoroqunolones	Moxifloxacin	Other Hospital	1	1	1	1	0	0	1	1	0
1030	1	1999-05-04	18	3	1	2018-04-23	3	1	2018-04-24	2018-04-20	4	2018-04-23	2018-05-01	9	138	138		1	2018-04-24	NCR	Manila	0	<5000 PHP	Secondly	0	0	0		0	0		1	0	0							0	0	1	0	0	0	0	0	0
1031	0	2002-10-10	15	2	1	2018-04-24	3	0	2018-04-24	2018-04-17	8	2018-04-25	2018-04-26	3	137	138		1	2018-04-24	Region 3		2	<5000 PHP	Tertiary	0	0	0		0	0		1	0	0							0	0	1	0	0	1	1	0	0
1032	0	1995-03-19	23	3	0	2018-04-25	3	0	2018-04-25	2018-04-21	5	2018-04-26	2018-05-03	9	134	141		1	2018-04-27	NCR	Manila	0	5000-10000 PHP	Vocational	0	0	0		0	0		1	1	1	2018-04-24	1	18:00:00	Cephalosporines	Cefixime	Other Hospital	1	1	1	0	1	1	1	1	0
1033	0	1998-04-10	20	3	1	2018-04-24	3	1	2018-04-25	2018-04-12	13	2018-04-27	2018-05-02	9	0	0		1	2018-04-25	Region 4		2	<5000 PHP	Secondly	0	0	0		2	1	4	1	0	0							0	1	1	1	0	0	0	0	0
1034	0	2015-04-19	3	1	0	2018-04-25	3	0	2018-04-25	2018-04-18	8	2018-04-26	2018-04-30	6	64	64		0		NCR	Manila	0	<5000 PHP	Secondly	0	0	0		0	0		1	0	0							0	0	0	0	0	0	1	0	0
1035	0	2011-02-12	7	2	1	2018-04-26	3	0	2018-04-26	2018-04-23	4	2018-04-28	2018-05-02	7	61.2	1		0		NCR	Quezon	1	<5000 PHP	Tertiary	0	0	1	others	0	0		1	0	0							0	0	0	0	0	0	1	1	0
1036	0	2015-10-03	2	1	0	2018-04-26	3	0	2018-04-26	2018-04-24	3	2018-04-27	2018-04-30	5	64.3	1		0		NCR	Manila	0	<5000 PHP	Primary	0	0	1	others	0	0		1	1	2	2018-04-26	0	08:00:00	Penicillines	Amoxicillin	Other Hospital	1	1	0	0	0	1	1	1	0
1037	0	2007-10-22	10	2	1	2018-04-26	3	0	2018-04-26	2018-04-12	15	2018-04-27	2018-05-04	9	142	143		1	2018-04-27	NCR	Malabon	1	<5000 PHP	Tertiary	0	0	0		0	0		1	1							Other Hospital	1	0	0	0	0	0	0	0	0
1039	0	1995-07-27	22	3	1	2018-04-27	3	0	2018-04-27	2018-04-23	5	2018-04-28	2018-04-30	4	145	145		0		NCR	Manila	0	<5000 PHP	Secondly	0	0	0		2	1	6	1	0	0							0	0	1	0	0	0	0	0	0
1040	0	2014-12-18	3	1	1	2018-04-30	3	0	2018-04-30	2018-04-25	6	2018-05-01	2018-05-08	9	0	0		0		NCR	Caloocan	1	<5000 PHP	Primary	0	0	0		0	0		1	0	0							0	0	0	0	0	0	1	0	0
1041	0	2013-10-31	4	1	1	2018-04-30	3	0	2018-04-30	2018-04-26	5	2018-05-01	2018-05-05	6	60.4	0		0		NCR	Caloocan	1	5000-10000 PHP	Vocational	0	0	0		0	0		1	0	0							0	0	1	0	0	0	1	0	0
1042	0	1998-11-17	19	3	0	2018-05-02	3	0	2018-05-02	2018-04-27	6	2018-05-03	2018-05-09	8	140	145		1	2018-05-02	Region 4		2	10000-15000 PHP	Tertiary	0	0	0		0	0		1	1	3	2018-04-30	2	08:00:00	B-lactamase Inhibitors	Co-Amoxiclav	Other Hospital	1	1	0	0	0	1	0	0	0
1043	1	1997-10-17	20	3	1	2018-05-02	3	0	2018-05-02	2018-04-27	6	2018-05-02	2018-05-09	8	137	138		1	2018-05-02	NCR	Quezon	1	<5000 PHP	Secondly	0	0	0		0	0		1	0	0							0	0	1	0	0	0	1	0	0
1044	1	2002-11-13	15	2	0	2018-05-02	3	0	2018-05-02	2018-04-27	6	2018-05-03	2018-05-05	4	145.3	142.4		1	2018-05-02	NCR	Manila	0	10000-15000 PHP	Tertiary	0	0	0		0	0		1	1	3	2018-05-01	1	08:00:00	Unknown	Unknown	Private Clinic	1	0	1	0	0	1	1	0	0
1045	0	1977-05-17	40	3	1	2018-05-03	3	1	2018-05-04	2018-05-01	3	2018-05-05	2018-05-10	8	0	0		1	2018-05-04	NCR	Manila	0	<5000 PHP	Secondly	0	0	1	others	0	0		1	0	0							0	0	1	0	1	1	1	1	0
1047	0	2013-11-09	4	1	0	2018-05-07	3	0	2018-05-07	2018-05-02	6	2018-05-08	2018-05-11	5	64.3	64.4		1	2018-05-07	NCR	Manila	0	<5000 PHP	Secondly	0	0	0		0	0		1	0	0							0	0	1	0	0	0	1	0	0
1048	0	2006-06-04	11	2	1	2018-05-07	3	0	2018-05-07	2018-05-03	5	2018-05-08	2018-05-09	3	144.4	142.2		1	2018-05-08	NCR	Quezon	1	<5000 PHP	Secondly	0	0	0		0	0		1	0	0							0	0	0	0	0	0	0	0	0
1049	0	1948-06-09	69	3	1	2018-05-06	3	1	2018-05-07	2018-05-01	6	2018-06-10	2018-06-25	51	0	0		1	2018-05-07	Region 4		2	<5000 PHP	Primary	0	0	1	diabetes;others	1	1	4	0	0	0							0	1	1	0	0	0	1	1	0
1050	0	1968-03-10	50	3	1	2018-05-08	3	0	2018-05-08	2018-05-02	7	2018-05-09	2018-05-10	3	0	0		1	2018-05-08	NCR	Manila	0	<5000 PHP	Secondly	0	0	0		2	1	4	1	0	0							0	0	0	0	0	0	0	0	0
1051	1	1996-10-10	21	3	1	2018-05-07	3	1	2018-05-08	2018-05-04	4	2018-05-08	2018-05-12	6	0	0		1	2018-05-08	NCR	Malabon	1	<5000 PHP	Secondly	0	0	0		0	0		1	0	0							0	1	1	0	0	1	0	0	0
1052	1	1993-05-29	24	3	0	2018-05-08	3	0	2018-05-08	2018-05-04	5	2018-05-09	2018-05-13	6	143	146		1	2018-05-08	NCR	Quezon	1	<5000 PHP	Tertiary	0	0	0		0	0		1	0	0							0	1	1	0	0	1	0	0	0
1053	0	1966-03-19	52	3	0	2018-05-09	3	0	2018-05-09	2018-05-08	2	2018-05-10	2018-05-15	7	0	0		1	2018-05-15	NCR	Manila	0	<5000 PHP	Secondly	0	0	0		2	0		1	0	0							0	1	0	0	1	1	0	0	0
1054	0	2000-09-01	17	2	0	2018-05-08	3	1	2018-05-09	2018-05-02	7	2018-05-10	2018-05-12	5	142	142		1	2018-05-09	NCR	Quezon	1	<5000 PHP	Secondly	0	0	0		0	0		1	0	0							0	0	1	0	0	0	1	0	0
1055	0	2006-09-06	11	2	0	2018-05-09	3	1	2018-05-10	2018-05-09	1	2018-05-10	2018-05-12	4	140	140		0		NCR	Manila	0	<5000 PHP	Secondly	0	0	0		0	0		1	0	0							0	0	0	0	0	0	0	0	0
1056	0	1943-03-01	75	3	1	2018-05-10	3	0	2018-05-10	2018-04-23	18	2018-05-12	2018-05-25	16	145	145		1	2018-05-10	Region 4		2	<5000 PHP	Primary	0	0	1	others	0	0		1	0	0							0	0	1	0	0	0	0	1	0
1057	0	1992-12-10	25	3	1	2018-05-10	3	0	2018-05-10	2018-05-03	8	2018-05-11	2018-05-17	8	140.8	144.7		1	2018-05-16	NCR	Caloocan	1	10000-15000 PHP	Primary	0	0	0		0	0		1	1	1	2018-05-07	3	09:00:00	Macrolides	Azithromycin	Private Clinic	1	0	0	0	0	0	1	1	0
1058	1	1980-12-26	37	3	0	2018-05-15	3	0	2018-05-15	2018-05-11	5	2018-05-17	2018-05-23	9	145	142		1	2018-05-16	NCR	Manila	0	<5000 PHP	Tertiary	0	0	0		0	0		1	1	4	2018-05-14	1	20:00:00	Penicillines	Amoxicillin	Pharmacy	0	0	1	0	0	0	1	0	0
1059	0	2014-06-06	3	1	1	2018-05-15	3	0	2018-05-15	2018-05-12	4	2018-05-17	2018-05-20	6	60.7	60.1		1	2018-05-16	NCR	Manila	0	<5000 PHP	Vocational	0	0	0		0	0		1	0	0							0	0	0	0	0	1	1	0	0
1060	0	1995-12-21	22	3	0	2018-05-15	3	0	2018-05-15	2018-05-14	2	2018-05-16	2018-05-21	7	0	0		1	2018-05-15	NCR	Manila	0	<5000 PHP	Tertiary	0	0	0		0	0		1	0	0							0	0	1	0	1	1	1	1	0
1061	0	2003-07-01	14	2	1	2018-05-15	3	0	2018-05-15	2018-05-11	5	2018-05-15	2018-05-15	1	145	145		0		NCR	Paranaque	1	<5000 PHP	Primary	1	0	1	others	0	0		1	0	0							0	0	1	0	0	1	1	0	0
1062	0	1997-02-18	21	3	1	2018-05-16	3	0	2018-05-16	2018-05-07	10	2018-05-17	2018-05-21	6	0	145		1	2018-05-17	NCR	Manila	0	10000-15000 PHP	Tertiary	0	0	1	others	0	0		1	0	0							0	1	1	1	0	0	1	0	0
1063	0	1967-04-26	51	3	0	2018-05-17	3	0	2018-05-17	2018-05-10	8	2018-05-18	2018-05-23	7	142	142.6		1	2018-05-17	NCR	Manila	0	<5000 PHP	Tertiary	0	0	0		0	0		1	1	3	2018-05-15	2	12:00:00	Cephalosporines	Cefixime	Public health center	1	1	1	1	0	1	1	0	0
1064	0	2001-12-23	16	2	0	2018-05-17	3	0	2018-05-17	2018-05-14	4	2018-05-19	2018-06-15	30	141	144.4		1	2018-05-21	Region 3		2	<5000 PHP	Secondly	0	1	0		0	0		1	1	1	2018-05-15	2	10:00:00	Cephalosporines	Cefuroxime	Private Clinic	1	1	0	0	0	0	0	0	0
1065	0	2000-12-22	17	2	1	2018-05-17	3	0	2018-05-17	2018-05-14	4	2018-05-19	2018-05-30	14	145	145		1	2018-05-21	NCR	Manila	0	<5000 PHP	Secondly	0	0	0		0	0		1	0	0							0	0	0	0	0	0	1	0	0
1066	0	1989-01-12	29	3	0	2018-05-18	3	0	2018-05-18	2018-05-10	9	2018-05-20	2018-05-24	7	145	145		1	2018-05-18	NCR	Caloocan	1	<5000 PHP	Tertiary	0	0	1	others	0	0		1	0	0							0	0	1	0	0	0	0	0	0
1067	1	1989-10-03	28	3	1	2018-05-17	3	1	2018-05-18	2018-05-14	4	2018-05-18	2018-05-20	4	144	144		1	2018-05-18	NCR	Manila	0	10000-15000 PHP	Secondly	0	0	1	others	2	0		1	0	0							0	1	0	0	0	0	0	0	0
1069	0	1998-12-12	19	3	1	2018-05-21	3	0	2018-05-21	2018-05-16	6	2018-05-22	2018-05-24	4	145	144		1	2018-05-21	NCR	Quezon	1	<5000 PHP	Tertiary	0	0	0		2	0		1	0	0							0	0	1	0	1	1	1	0	0
1070	0	2001-10-29	16	2	0	2018-05-21	3	0	2018-05-21	2018-05-15	7	2018-05-23	2018-05-29	9	145	145		0		NCR	Paranaque	1	5000-10000 PHP	Tertiary	0	0	0		0	0		1	0	0							0	0	1	1	0	0	0	0	0
1071	1	2011-11-01	6	2	1	2018-05-22	3	0	2018-05-22	2018-05-19	4	2018-05-23	2018-05-24	3	145	145		1	2018-05-23	NCR	Paranaque	1	<5000 PHP	Primary	0	0	0		0	0		1	0	0							0	0	1	0	0	0	0	0	0
1072	1	1994-11-01	23	3	1	2018-05-22	3	0	2018-05-22	2018-05-19	4	2018-05-23	2018-05-24	3	145	145		1	2018-05-22	NCR	Caloocan	1	10000-15000 PHP	Vocational	0	0	0		0	0		1	0	0							0	0	1	0	0	0	1	0	0
1073	0	1982-11-16	35	3	1	2018-05-22	3	0	2018-05-22	2018-05-19	4	2018-05-23	2018-05-24	3	145	145		1	2018-05-22	NCR	Caloocan	1	<5000 PHP	Primary	0	0	0		2	1	7	1	0	0							0	0	1	1	0	0	1	1	0
1074	0	1988-12-25	29	3	1	2018-05-22	3	0	2018-05-22	2018-05-15	8	2018-05-23	2018-05-27	6	145	145		0		NCR	Manila	0	<5000 PHP	Secondly	0	0	0		2	1	7	1	0	0							0	1	1	1	0	0	0	0	0
1075	0	1977-05-03	41	3	1	2018-05-23	3	0	2018-05-23	2018-05-19	5	2018-05-24	2018-05-31	9	145	145		0		NCR	Navotas	1	10000-15000 PHP	Tertiary	0	0	1	others	2	1		1	0	0							0	0	1	0	1	0	0	0	0
1076	0	1979-12-18	38	3	1	2018-05-24	3	0	2018-05-24	2018-05-22	3	2018-05-23	2018-05-29	6	145	145		1	2018-05-25	NCR	Quezon	1	10000-15000 PHP	Tertiary	0	0	0		2	0		1	1	2	2018-05-23	1	23:00:00	Penicillines	Amoxicillin	Pharmacy	1	0	1	0	0	0	0	0	0
1077	0	2004-07-31	13	2	0	2018-05-24	3	0	2018-05-24	2018-05-19	6	2018-05-25	2018-05-26	3	143	142		1	2018-05-25	NCR	Valenzuela	1	5000-10000 PHP	Tertiary	0	0	1	others	0	0		1	0	0							0	0	1	0	0	0	0	1	0
1078	0	2000-12-09	17	2	1	2018-05-25	3	0	2018-05-25	2018-05-18	8	2018-05-26	2018-06-22	29	145	145		1	2018-05-25	NCR	Manila	0	10000-15000 PHP	Secondly	0	0	0		0	0		1	0	0							0	0	1	0	0	0	0	0	0
1079	0	2015-08-31	2	1	0	2018-05-28	3	0	2018-05-28	2018-05-24	5	2018-05-29	2018-05-31	4	61.1	60.9		0		NCR	Manila	0	<5000 PHP	Secondly	0	0	0		0	0		1	0	0							0	0	0	0	0	0	1	1	0
1080	0	1982-10-26	35	3	0	2018-05-28	3	0	2018-05-28	2018-05-15	14	2018-05-29	2018-06-08	12	145	145		1	2018-05-29	NCR	Manila	0	<5000 PHP	Secondly	0	0	0		0	0		1	1	14	2018-05-27	1	18:00:00	Cephalosporines	Cefuroxime	Other Hospital	1	0	1	0	0	0	1	1	0
1081	0	1996-03-20	22	3	1	2018-05-28	3	0	2018-05-28	2018-05-24	5	2018-05-29	2018-06-05	9	145	145		1	2018-05-29	Region 4		2	<5000 PHP	Primary	0	0	0		2	1	1	1	1	2	2018-05-27	1	07:00:00	Cephalosporines	Cefuroxime	Other Hospital	1	0	1	0	0	0	1	1	0
1082	1	1994-10-21	23	3	0	2018-05-29	3	0	2018-05-29	2018-05-26	4	2018-05-30	2018-06-02	5	140	140		1	2018-05-30	NCR	Valenzuela	1	10000-15000 PHP	Tertiary	0	0	0		0	0		1	0	0							0	1	0	0	0	1	0	0	0
1083	1	2009-03-06	9	2	0	2018-05-29	3	0	2018-05-29	2018-05-25	5	2018-05-30	2018-06-02	5	140	0		1	2018-05-31	NCR	Malabon	1	15000-20000 PHP	Tertiary	1	0	0		0	0		1	0	0							0	0	1	0	0	0	0	0	0
1084	0	2004-09-15	13	2	1	2018-05-30	3	0	2018-05-30	2018-05-14	17	2018-06-03	2018-07-02	34	138	138		0		NCR	Taguig	1	<5000 PHP	Secondly	1	0	1	others	0	0		1	0	0							0	0	0	0	0	0	1	1	0
1085	0	2016-11-07	1	1	1	2018-05-29	3	2	2018-05-31	2018-05-26	4	2018-05-30	2018-06-11	14	0	0		0		NCR	Manila	0	<5000 PHP	Secondly	0	0	1	others	0	0		1	0	0							0	0	0	0	0	0	0	0	0
1086	0	1967-10-10	50	3	1	2018-05-31	3	0	2018-05-31	2018-05-29	3	2018-06-02	2018-06-05	6	0	140		1	2018-06-01	NCR	Manila	0	<5000 PHP	Tertiary	0	0	0		2	1	15	1	0	0							0	1	1	1	0	0	0	1	0
1087	0	1994-01-16	24	3	0	2018-05-31	3	0	2018-05-31	2018-05-28	4	2018-06-02	2018-06-17	18	143	145		0		Region 4		2	5000-10000 PHP	Secondly	0	0	0		0	0		1	0	0							0	0	1	0	0	0	0	0	0
1088	0	1964-07-09	53	3	1	2018-06-01	3	0	2018-06-01	2018-05-23	10	2018-06-08	2018-06-28	28	145	145		1	2018-06-04	NCR	Manila	0	<5000 PHP	Secondly	0	0	0		0	0		0	0	0							0	0	1	0	1	1	1	1	0
1089	0	1980-12-06	37	3	1	2018-06-02	3	2	2018-06-04	2018-05-26	8	2018-06-03	2018-06-05	4	0	0		1	2018-06-04	NCR	Manila	0	<5000 PHP	Secondly	0	0	0		2	1	3	1	1	2	2018-06-02	0	07:00:00	Fluoroqunolones	Ciprofloxacin	Private Clinic	1	0	1	1	0	0	0	0	0
1090	0	1994-08-17	23	3	1	2018-06-04	3	0	2018-06-04	2018-05-26	10	2018-06-05	2018-06-07	4	145	145		1	2018-06-05	NCR	Manila	0	5000-10000 PHP	Tertiary	0	0	0		2	0		1	1	6	2018-06-04	0	08:00:00	Cephalosporines	Cefuroxime	Private Clinic	0	0	1	0	0	0	1	0	0
1091	0	2005-09-26	12	2	0	2018-06-04	3	0	2018-06-04	2018-05-27	9	2018-06-05	2018-06-10	7	140	141		1	2018-06-05	NCR	Las Pinas	1	<5000 PHP	Secondly	0	0	1	others	0	0		1	1	3	2018-06-04	0	01:00:00	Co-trimo	Co-trimoxazole	Public health center	0	0	1	0	0	0	0	0	0
1092	1	2006-08-08	11	2	1	2018-06-05	3	0	2018-06-05	2018-05-31	6	2018-06-06	2018-06-08	4	145	145		1	2018-06-05	Region 3		2	5000-10000 PHP	Tertiary	0	0	0		0	0		1	1	5	2018-06-04	1	08:00:00	Cephalosporines	Cefuroxime	Private Clinic	1	0	1	0	1	1	1	0	0
1093	0	2016-04-09	2	1	1	2018-06-05	3	0	2018-06-05	2018-06-03	3	2018-06-07	2018-06-19	15	0	0		0		NCR	Manila	0	5000-10000 PHP	Tertiary	0	0	0		0	0		1	0	0							0	1	1	1	1	1	0	0	0
1094	0	2014-11-11	3	1	1	2018-06-05	3	0	2018-06-05	2018-05-27	10	2018-06-06	2018-06-09	5	65	64.5		1	2018-06-05	NCR	Manila	0	5000-10000 PHP	Secondly	0	0	1	others	0	0		1	1	7	2018-06-03	2	08:00:00	Penicillines	Amoxicillin	Private Clinic	1	0	1	0	1	0	0	0	0
1096	1	2013-07-14	4	1	1	2018-06-06	3	0	2018-06-06	2018-06-03	4	2018-06-07	2018-06-08	3	67	67		1	2018-06-07	NCR	Manila	0	<5000 PHP	Secondly	0	0	0		0	0		1	0	0							0	0	1	0	0	0	0	0	0
1097	0	2004-01-18	14	2	1	2018-06-06	3	0	2018-06-06	2018-06-01	6	2018-06-07	2018-06-10	5	145	145		1	2018-06-07	NCR	Caloocan	1	5000-10000 PHP	Secondly	0	0	0		0	0		1	0	0							0	0	1	0	0	0	1	0	0
1098	0	2016-03-14	2	1	0	2018-06-06	3	1	2018-06-07	2018-06-02	5	2018-06-07	2018-06-12	7	0	0		0		Region 4		2	15000-20000 PHP	Tertiary	0	0	0		0	0		1	0	0							0	1	0	0	0	0	1	0	0
1100	0	1957-05-21	61	3	1	2018-06-11	3	0	2018-06-11	2018-06-09	3	2018-06-13	2018-06-22	12	143	143		1	2018-06-13	Region 4		2	<5000 PHP	none	0	0	0		2	1	1	1	0	0							0	1	1	0	0	0	1	1	1
1102	0	2010-09-07	7	2	1	2018-06-12	3	1	2018-06-13	2018-06-06	7	2018-06-14	2018-06-18	7	0	0		1	2018-06-13	Region 4		2	15000-20000 PHP	Tertiary	0	0	0		0	0		1	1	4	2018-06-10	2	20:00:00	B-lactamase Inhibitors	Co-Amoxiclav	Pharmacy	1	1	0	0	1	1	1	1	0
1103	0	2003-04-02	15	2	1	2018-06-12	3	1	2018-06-13	2018-06-05	8	2018-06-14	2018-06-23	12	0	0		0		NCR	Manila	0	10000-15000 PHP	Vocational	0	0	0		0	0		1	1	4	2018-06-12	0	08:00:00	B-lactamase Inhibitors	Co-Amoxiclav	Private Clinic	1	1	0	0	0	0	1	0	0
1104	0	1971-07-06	46	3	0	2018-06-13	3	0	2018-06-13	2018-06-08	6	2018-07-10	2018-07-28	46	140	140		1	2018-06-14	NCR	Manila	0	<5000 PHP	Tertiary	0	0	1	diabetes	0	0		0	0	0							0	0	1	1	0	0	1	1	0
1105	1	1994-04-15	24	3	1	2018-06-13	3	1	2018-06-14	2018-06-09	5	2018-06-14	2018-06-18	6	140	1		1	2018-06-14	NCR	Manila	0	10000-15000 PHP	Tertiary	0	0	0		2	1	6	1	0	0							0	0	1	0	0	0	0	0	0
1106	1	1999-11-01	18	3	1	2018-06-13	3	1	2018-06-14	2018-06-10	4	2018-06-14	2018-06-17	5	142	142		1	2018-06-14	NCR	Quezon	1	<5000 PHP	Secondly	0	0	1	others	2	1	15	1	0	0							0	0	1	0	0	0	0	0	0
1107	0	1983-05-20	35	3	1	2018-06-18	3	0	2018-06-18	2018-06-17	2	2018-06-19	2018-06-20	3	145	0		1	2018-06-19	NCR	Mandaluyong	1	5000-10000 PHP	Secondly	0	0	0		2	1	15	1	1	1	2018-06-17	1	21:00:00	Penicillines	Amoxicillin	Pharmacy	0	0	1	1	0	0	0	0	0
1108	1	1958-06-12	60	3	1	2018-06-19	3	0	2018-06-19	2018-06-16	4	2018-06-20	2018-06-23	5	142	142		1	2018-06-19	Region 4		2	<5000 PHP	Primary	0	0	0		2	1	12	1	0	0							0	1	1	1	0	0	1	1	0
1109	1	2001-02-05	17	2	1	2018-06-19	3	0	2018-06-19	2018-06-16	4	2018-06-20	2018-06-25	7	142	142		1	2018-06-19	NCR	Valenzuela	1	5000-10000 PHP	Secondly	0	0	0		2	1	3	1	0	0							0	1	0	0	0	0	1	0	0
1110	0	1951-11-10	66	3	1	2018-06-20	3	0	2018-06-20	2018-06-17	4	2018-06-22	2018-06-23	4	143.2	143		1	2018-06-21	NCR	Manila	0	<5000 PHP	Secondly	0	0	0		2	0		1	0	0							0	0	0	1	0	0	0	0	0
1111	0	2014-11-25	3	1	1	2018-06-20	3	0	2018-06-20	2018-06-16	5	2018-06-21	2018-06-24	5	66	66		1	2018-06-22	NCR	Manila	0	<5000 PHP	Primary	0	0	0		0	0		1	0	0							0	0	1	1	0	0	1	1	0
1112	0	1996-08-13	21	3	1	2018-06-21	3	0	2018-06-21	2018-06-16	6	2018-06-23	2018-06-28	8	143	142		1	2018-06-22	NCR	Caloocan	1	5000-10000 PHP	Secondly	0	0	1	others	0	0		1	0	0							0	1	0	0	0	0	0	0	0
1113	0	2011-11-23	6	2	1	2018-06-21	3	0	2018-06-21	2018-06-16	6	2018-06-23	2018-06-27	7	64.1	64		1	2018-06-22	NCR	Manila	0	<5000 PHP	Primary	0	0	0		0	0		1	0	0							0	1	1	0	0	0	1	0	0
1114	0	1990-11-04	27	3	1	2018-06-21	3	0	2018-06-21	2018-06-16	6	2018-06-22	2018-06-22	2	145	145		1	2018-06-21	NCR	Manila	0	<5000 PHP	Tertiary	0	0	0		0	0		1	0	0							0	0	1	0	0	0	1	0	0
1115	0	1973-08-02	44	3	1	2018-06-22	3	0	2018-06-22	2018-06-19	4	2018-06-23	2018-07-01	10	145	145		1	2018-06-22	NCR	Paranaque	1	5000-10000 PHP	Secondly	0	0	0		2	0	1	1	0	0							0	1	1	0	0	1	0	1	0
1116	0	1994-04-21	24	3	1	2018-06-21	3	1	2018-06-22	2018-06-18	4	2018-06-22	2018-06-25	5	142	142		1	2018-06-22	NCR	Caloocan	1	<5000 PHP	Secondly	0	0	0		2	1	15	1	0	0							0	0	1	0	0	0	1	0	0
1117	0	1979-04-04	39	3	1	2018-06-25	3	0	2018-06-25	2018-06-23	3	2018-06-27	2018-07-17	23	140	145		1	2018-06-25	NCR	Manila	0	10000-15000 PHP	Tertiary	1	0	1		2	1	1	1	0	0							0	1	1	1	0	0	0	1	0
1118	0	1995-09-18	22	3	1	2018-06-25	3	0	2018-06-25	2018-06-22	4	2018-06-25	2018-06-25	1	141	142		0		NCR	Paranaque	1	5000-10000 PHP	Secondly	0	0	0		2	1	8	1	0	0							0	0	1	0	0	0	0	1	0
1119	0	2006-11-30	11	2	1	2018-06-24	3	1	2018-06-25	2018-06-19	6	2018-06-29	2018-07-08	15	0	0		1	2018-06-27	NCR	Quezon	1	<5000 PHP	Secondly	0	0	1	others	0	0		1	0	0							0	0	0	0	0	1	0	0	0
1120	1	2005-04-24	13	2	0	2018-06-26	3	0	2018-06-26	2018-06-20	7	2018-06-27	2018-07-01	6	142	142		1	2018-06-26	NCR	Manila	0	10000-15000 PHP	Secondly	0	0	0		0	0		1	1	1	2018-06-25	1	21:00:00	Co-trimo	Co-trimoxazole	Private Clinic	1	0	1	0	0	0	0	0	0
1121	0	2002-11-27	15	2	1	2018-06-25	3	1	2018-06-26	2018-06-19	7	2018-06-26	2018-06-28	4	141	142		1	2018-06-27	NCR	Pasay	1	15000-20000 PHP	Tertiary	0	0	1	others	0	0		1	1	1	2018-06-25	0	12:00:00	Cephalosporines	Cefuroxime	Private Clinic	1	0	1	0	0	0	0	1	0
1122	0	1978-12-21	39	3	1	2018-06-26	3	0	2018-06-26	2018-06-22	5	2018-06-27	2018-06-28	3	142	142		1	2018-06-26	NCR	Caloocan	1	<5000 PHP	Secondly	0	0	0		1	1	1	1	1	1	2018-06-25	1	20:00:00	Fluoroqunolones	Ofloxacin	Private Clinic	1	0	1	0	0	0	0	0	0
1123	0	2008-05-14	10	2	0	2018-06-27	3	0	2018-06-27	2018-06-21	7	2018-06-28	2018-07-03	7	0	1		1	2018-06-27	NCR	Manila	0	<5000 PHP	Secondly	0	0	0		0	0		1	0	0							0	0	1	0	0	0	0	0	0
1124	0	1995-06-02	23	3	1	2018-06-27	3	0	2018-06-27	2018-06-23	5	2018-06-28	2018-06-30	4	145	145		1	2018-06-27	NCR	Quezon	1	<5000 PHP	Vocational	0	0	1	others	2	0		1	1	1	2018-06-24	3	09:00:00	Penicillines	Amoxicillin	Pharmacy	1	1	1	0	0	0	0	0	0
1125	0	2011-07-26	6	2	1	2018-06-28	3	0	2018-06-28	2018-06-21	8	2018-06-29	2018-06-30	3	145	145		0		NCR	Caloocan	1	<5000 PHP	Secondly	0	0	0		0	0		1	0	0							0	0	1	0	0	0	0	0	0
1126	0	1994-07-05	23	3	1	2018-06-28	3	0	2018-06-28	2018-06-22	7	2018-06-30	2018-07-11	14	145	145		0		NCR	Navotas	1	<5000 PHP	Vocational	0	0	0		0	0		1	0	0							0	0	1	0	0	0	1	1	0
1127	0	1958-01-11	60	3	1	2018-06-28	3	0	2018-06-28	2018-06-21	8	2018-06-28	2018-06-28	1	138	0		1	2018-06-28	NCR	Manila	0	<5000 PHP	Secondly	1	1	1	others	0	0		1	0	0							0	0	1	0	0	0	0	1	0
1128	0	1993-06-08	25	3	1	2018-06-28	3	0	2018-06-28	2018-06-26	3	2018-06-30	2018-07-06	9	141	143.7		1	2018-06-28	NCR	Manila	0	<5000 PHP	Primary	0	0	0		2	1	15	1	0	0							0	1	1	0	0	0	1	1	0
1129	0	1984-11-26	33	3	1	2018-06-28	3	0	2018-06-28	2018-06-26	3	2018-06-29	2018-06-30	3	140	141.4		0		NCR	Manila	0	<5000 PHP	Secondly	0	0	0		2	1	1	1	0	0							0	0	1	1	0	0	0	0	0
1130	0	1997-09-05	20	3	1	2018-06-28	3	0	2018-06-28	2018-06-21	8	2018-06-30	2018-07-03	6	142.3	142.7		1	2018-06-28	NCR	Manila	0	<5000 PHP	Secondly	0	0	0		2	1	3	1	1	1	2018-06-27	1	08:00:00	Fluoroqunolones	Ciprofloxacin	Private Clinic	1	0	1	0	0	0	0	0	0
1131	0	1985-02-04	33	3	1	2018-06-29	3	0	2018-06-29	2018-06-24	6	2018-07-01	2018-07-05	7	145	145		1	2018-07-02	NCR	Manila	0	<5000 PHP	Primary	0	0	1	others	2	1	1	1	0	0							0	0	1	1	0	0	0	0	0
1132	0	1993-01-19	25	3	1	2018-06-29	3	0	2018-06-29	2018-06-27	3	2018-06-30	2018-07-03	5	145	145		1	2018-07-02	NCR	Valenzuela	1	5000-10000 PHP	Secondly	0	0	0		2	1	3	1	1	3	2018-06-28	1	08:00:00	Tetracyclines	Doxycycline	Private Clinic	1	0	1	0	0	0	0	0	0
1133	0	1981-04-04	37	3	1	2018-06-29	3	0	2018-06-29	2018-06-24	6	2018-06-30	2018-07-05	7	145	145		1	2018-07-02	NCR	Quezon	1	5000-10000 PHP	Secondly	0	0	0		0	0		1	1	2	2018-06-29	0	07:00:00	Fluoroqunolones	Ciprofloxacin	Private Clinic	1	0	1	0	0	0	0	0	0
1134	0	1986-12-09	31	3	1	2018-06-29	3	0	2018-06-29	2018-06-22	8	2018-06-30	2018-07-05	7	145	145		1	2018-06-29	Region 7		2	5000-10000 PHP	Secondly	0	0	0		2	1	9	1	0	0							0	0	1	0	0	1	1	1	0
1135	0	1993-07-02	24	3	1	2018-06-29	3	0	2018-06-29	2018-06-24	6	2018-06-30	2018-07-05	7	145	145		1	2018-07-02	NCR	Manila	0	<5000 PHP	Secondly	0	0	0		2	1	7	1	0	0							0	0	1	1	0	1	1	1	0
1136	0	1995-05-10	23	3	1	2018-06-29	3	0	2018-06-29	2018-06-28	2	2018-06-30	2018-07-05	7	145	145		1	2018-07-02	NCR	Manila	0	<5000 PHP	Tertiary	0	0	0		2	0		1	0	0							0	0	1	0	0	0	0	0	0
1137	0	1967-03-28	51	3	1	2018-07-02	4	0	2018-07-02	2018-06-25	7	2018-07-03	2018-07-05	4	142	142		1	2018-07-02	Region 3		2	<5000 PHP	Secondly	0		1	others	2	1	9	1	1	5	2018-07-01	1	23:00:00	Cephalosporines	Cefuroxime	Other Hospital	1	0	1	1	0	0	1	1	0
1138	0	1954-01-24	64	3	1	2018-07-02	4	0	2018-07-02	2018-06-29	3	2018-07-03	2018-07-05	4	140	140		1	2018-07-04	Region 3		2	<5000 PHP	Secondly	1		1	others	0	0		1	0								0	0	0	0	1	0	1	1	0
1139	0	1989-10-23	28	3	1	2018-07-02	4	0	2018-07-02	2018-06-29	3	2018-07-03	2018-07-05	4	138	138		1	2018-07-04	NCR	Malabon	1	<5000 PHP	Secondly	0		0		2	0		1	0								0	0	1	0	0	0	0	0	0
1140	0	1984-11-13	33	3	1	2018-07-03	4	0	2018-07-03	2018-06-29	4	2018-07-04	2018-07-04	2	145	145		0		Region 4		2	<5000 PHP	Secondly	0		0		2	1	1	1	0								0	1	1	0	0	0	0	0	0
1141	0	1999-05-08	19	3	0	2018-07-03	4	0	2018-07-03	2018-06-30	3	2018-07-04	2018-07-06	4	145	145		1	2018-07-03	NCR	Malabon	1	<5000 PHP	Tertiary	0	0	0		0	0		1	0								0	0	1	0	0	0	0	0	0
1142	1	1995-12-11	22	3	1	2018-07-03	4	0	2018-07-03	2018-06-28	5	2018-07-04	2018-07-06	4	140	140		1	2018-07-04	NCR	Caloocan	1	<5000 PHP	Secondly	0		0		2	1	15	1	0								0	0	1	0	0	1	0	0	0
1143	0	1953-10-18	64	3	1	2018-07-02	4	1	2018-07-03	2018-06-30	2	2018-07-03	2018-07-08	7	0	0		1	2018-07-04	NCR	Manila	0	<5000 PHP	Tertiary	0		0		0	1	6	1	0								0	0	1	0	1	1	0	0	0
1144	1	1995-05-01	23	3	1	2018-07-02	4	1	2018-07-03	2018-06-28	4	2018-07-03	2018-07-06	5	138	142		1	2018-07-03	NCR	Manila	0	5000-10000 PHP	Secondly	1		0		2	1	8	1	0								0	0	1	0	0	0	0	0	0
1145	0	1998-11-05	19	3	1	2018-07-04	4	0	2018-07-04	2018-06-30	4	2018-07-07	2018-07-12	9	145	145		1	2018-07-04	NCR	Manila	0	<5000 PHP	Secondly	0		0		2	1	15	1	0								0	0	1	0	0	0	0	1	0
1146	0	2005-04-27	13	2	0	2018-07-04	4	0	2018-07-04	2018-07-02	2	2018-07-06	2018-07-09	6	145	145		1	2018-07-05	NCR	Pasay	1	15000-20000 PHP	Tertiary	0	0	1	others	0	0		1	1	1	2018-07-03	1	20:30:00	Fluoroqunolones	Norfloxacin	Private Clinic	1	0	1	1	0	0	0	0	0
1147	0	2006-07-08	11	2	0	2018-07-05	4	0	2018-07-05	2018-06-29	6	2018-07-07	2018-07-16	12	143	143		1	2018-07-05	NCR	Caloocan	1	<5000 PHP	Secondly	0	0	0		0	0		1	0								0	1	1	0	0	0	0	0	0
1148	0	2004-12-20	13	2	1	2018-07-05	4	0	2018-07-05	2018-06-30	5	2018-07-07	2018-07-11	7	145	145		1	2018-07-05	NCR	Manila	0	<5000 PHP	Tertiary	0		0		0	0		1	0								0	1	1	0	0	0	0	0	0
1149	0	2001-07-21	16	2	1	2018-07-04	4	1	2018-07-05	2018-07-03	1	2018-07-06	2018-07-11	8	145	145		1	2018-07-05	NCR	Caloocan	1	<5000 PHP	Secondly	0		0		0	0		1	0								0	1	1	1	0	0	0	0	0
1150	0	1948-05-18	70	3	1	2018-07-05	4	0	2018-07-05	2018-06-30	5	2018-07-07	2018-07-19	15	0	0		1	2018-07-06	NCR	Malabon	1	<5000 PHP	Primary	0		0		0	1	8	1	1	7	2018-07-04	1	12:00:00	Cephalosporines	Cefuroxime	Private Clinic	1	0	1	0	0	0	0	1	0
1151	0	1983-12-23	35	3	0	2018-07-09	4	0	2018-07-09	2018-07-05	4	2018-07-11	2018-07-13	5	142	142		1	2018-07-11	NCR	Malabon	1	<5000 PHP	Tertiary	0	0	0		0	0		1	0								0	0	1	0	0	0	1	1	0
1152	0	1970-05-15	48	3	0	2018-07-08	4	1	2018-07-09	2018-07-04	4	2018-07-09	2018-07-12	5	145	145		1	2018-07-09	NCR	Manila	0	<5000 PHP	Secondly	0	0	1	others	0	0		1	0								0	0	1	0	0	0	0	0	0
1153	0	1979-06-16	39	3	1	2018-07-09	4	1	2018-07-10	2018-07-05	4	2018-07-10	2018-07-10	2	142	142		0		NCR	Manila	0	<5000 PHP	Tertiary	0		0		1	1	7	1	0								0	0	1	0	0	0	1	1	0
1154	1	1991-06-05	27	3	1	2018-07-10	4	0	2018-07-10	2018-07-06	4	2018-07-11	2018-07-16	7	140	139		1	2018-07-10	NCR	Valenzuela	1	<5000 PHP	Secondly	0		0		2	0		1	0								0	0	1	0	0	0	0	0	0
1155	1	1999-07-02	19	3	1	2018-07-09	4	1	2018-07-10	2018-07-06	3	2018-07-10	2018-07-14	6	142	142		1	2018-07-10	NCR	Manila	0	<5000 PHP	Tertiary	0		0		0	0		1	0								0	0	1	0	1	1	0	0	0
1156	0	2001-08-31	16	2	1	2018-07-10	4	1	2018-07-11	2018-06-29	11	2018-07-10	2018-07-18	9	0	0		1	2018-07-11	NCR	Caloocan	1	<5000 PHP	Secondly	0		0		0	0		1	1	2	2018-07-07	3	20:00:00	B-lactamase Inhibitors	Co-Amoxiclav	Private Clinic	1	0	1	0	0	0	0	1	0
1157	0	1996-09-16	21	3	1	2018-07-10	4	1	2018-07-11	2018-07-07	3	2018-07-12	2018-07-21	12	145	145		1	2018-07-11	NCR	Caloocan	1	<5000 PHP	Tertiary	0		0		2	0		1	1	2	2018-07-10	0	07:00:00	Unknown	Unknown	Private Clinic	1	0	1	0	0	0	0	0	0
1158	0	1999-02-07	19	3	0	2018-07-12	4	0	2018-07-12	2018-07-07	5	2018-07-13	2018-07-16	5	145	145		0		NCR	Pasay	1	<5000 PHP	Primary	0	0	0		0	0		0	0								0	1	1	0	1	1	1	1	1
1159	0	1981-03-03	37	3	1	2018-07-13	4	0	2018-07-13	2018-07-12	1	2018-07-14	2018-07-14	2	145	145		1	2018-07-13	NCR		1	<5000 PHP	Secondly	0		1	diabetes;others	2	0		1	1	1	2018-07-12	1	17:00:00	Unknown	Unknown	Other Hospital	1	1	1	1	0	0	0	1	0
1160	0	1983-03-25	35	3	1	2018-07-20	4	0	2018-07-20	2018-07-14	6	2018-07-21	2018-07-28	9	145	145		1	2018-07-23	NCR	Manila	0	<5000 PHP	Secondly	0		0		0	1	4	0	0								0	0	1	0	0	0	0	0	0
1161	0	2010-05-04	8	2	1	2018-07-13	4	0	2018-07-13	2018-07-07	6	2018-07-14	2018-07-17	5	139	139		1	2018-07-16	NCR	Manila	0	<5000 PHP	Secondly	0		0		0	0		1	0								0	0	1	1	0	0	0	0	0
1162	0	2009-03-02	9	2	1	2018-07-13	4	0	2018-07-13	2018-07-10	3	2018-07-14	2018-07-15	3	139	0		0		NCR	Valenzuela	1	<5000 PHP	Secondly	0		0		0	0		1	0								0	1	1	0	0	0	1	0	0
1163	0	1993-08-09	24	3	1	2018-07-16	4	0	2018-07-16	2018-07-09	7	2018-07-17	2018-07-18	3	145	146		1	2018-07-16	NCR	Paranaque	1	<5000 PHP	Primary	0		0		2	0		1	0								0	0	1	0	0	0	0	0	0
1164	0	1987-12-18	30	3	1	2018-07-16	4	0	2018-07-16	2018-07-13	3	2018-07-17	2018-07-19	4	145	145		1	2018-07-18	NCR	Quezon	1	<5000 PHP	Primary	0		0		2	1	12	1	0								0	1	1	1	0	0	1	1	0
1165	1	1997-07-11	21	3	1	2018-07-17	4	0	2018-07-17	2018-07-14	3	2018-07-18	2018-07-21	5	145	145		1	2018-07-17	NCR	Valenzuela	1	<5000 PHP	Secondly	0		0		2	0		1	0								0	0	1	0	1	1	1	0	0
1166	1	2001-05-18	17	2	0	2018-07-17	4	0	2018-07-17	2018-07-12	5	2018-07-18	2018-07-20	4	145	145		0		Region 4		2	10000-15000 PHP	Tertiary	0	0	0		0	0		1	0								0	1	1	0	1	0	0	1	0
1167	0	2001-11-30	16	2	1	2018-07-18	4	0	2018-07-18	2018-07-13	5	2018-07-19	2018-07-26	9	145	145		1	2018-07-19	NCR	Malabon	1	5000-10000 PHP	Secondly	0		0		0	0		1	1	2	2018-07-17	1	21:00:00	B-lactamase Inhibitors	Co-Amoxiclav	Other Hospital	1	0	0	0	0	0	0	1	0
1168	0	1988-12-26	29	3	1	2018-07-18	4	0	2018-07-18	2018-07-13	5	2018-07-19	2018-07-22	5	145	145		1	2018-07-20	NCR	Manila	0	<5000 PHP	Secondly	0		0		2	1	8	1	0								0	0	1	0	0	0	0	1	0
1169	0	1943-10-08	74	3	1	2018-07-19	4	0	2018-07-19	2018-07-15	4	2018-07-20	2018-07-24	6	145	145		0		Region 4		2	<5000 PHP	Secondly	0		1	others	0	0		1	0								0	1	1	0	0	0	1	1	0
1170	0	2004-10-05	13	2	1	2018-07-20	4	0	2018-07-20	2018-07-16	4	2018-07-22	2018-07-27	8	146	146		1	2018-07-23	NCR	Manila	0	<5000 PHP	Secondly	0		0		0	0		1	0								0	0	1	0	0	0	1	0	0
1171	0	1997-02-22	21	3	0	2018-07-22	4	1	2018-07-23	2018-07-16	6	2018-07-23	2018-07-24	3	0	0		0		NCR	Paranaque	1	5000-10000 PHP	Secondly	0	0	0		0	0		1	0								0	0	1	0	0	0	0	1	0
1172	0	1987-10-28	30	3	1	2018-07-23	4	0	2018-07-23	2018-07-15	8	2018-07-24	2018-07-26	4	145	145		1	2018-07-23	NCR	Taguig	1	<5000 PHP	Primary	0		0		2	1	9	1	0								0	0	1	0	0	0	0	0	0
1173	0	2006-08-31	11	2	1	2018-07-23	4	0	2018-07-23	2018-07-16	7	2018-07-24	2018-08-06	15	145	145		1	2018-07-26	NCR	Malabon	1	<5000 PHP	Primary	0		1	others	0	0		1	0								0	0	1	0	0	0	0	0	0
1174	0	2012-12-16	5	2	1	2018-07-23	4	0	2018-07-23	2018-07-22	1	2018-07-24	2018-07-24	2	0	0		0		NCR	Caloocan	1	5000-10000 PHP	Secondly	0		0		0	0		1	0								0	1	1	0	0	1	0	1	0
1175	0	2005-09-27	12	2	1	2018-07-23	4	0	2018-07-23	2018-07-15	8	2018-07-24	2018-08-07	16	0	141		0		NCR	Quezon	1	<5000 PHP	Secondly	0		0		0	0		1	0								0	0	0	0	0	0	0	0	0
1176	0	1994-11-11	23	3	0	2018-07-24	4	0	2018-07-24	2018-07-17	7	2018-07-26	2018-07-28	5	0	0		0		NCR	Navotas	1	<5000 PHP	Secondly	0	0	0		0	0		1	0								0	1	0	0	1	1	1	1	0
1177	1	2007-05-25	11	2	1	2018-07-24	4	0	2018-07-24	2018-07-17	7	2018-07-25	2018-07-29	6	143	143		0		NCR	Manila	0	<5000 PHP	Secondly	0		0		0	0		1	0								0	0	1	0	0	0	1	0	0
1178	1	1986-11-24	31	3	0	2018-07-24	4	0	2018-07-24	2018-07-17	7	2018-07-25	2018-07-27	4	145	145		1	2018-07-26	NCR	Manila	0	5000-10000 PHP	Tertiary	0	0	0		0	0		1	1	2	2018-07-24	0	07:00:00	B-lactamase Inhibitors	Co-Amoxiclav	Private Clinic	1	0	1	0	1	1	0	0	0
1179	0	2009-04-03	9	2	0	2018-07-24	4	0	2018-07-24	2018-07-23	1	2018-07-25	2018-08-02	10	145	145		1	2018-07-26	NCR	Quezon	1	10000-15000 PHP	Secondly	0	0	0		0	0		1	0								0	0	1	0	0	0	1	0	0
1180	0	2012-02-19	6	2	1	2018-07-25	4	0	2018-07-25	2018-07-24	1	2018-07-26	2018-07-30	6	0	0		1	2018-07-25	Region 4		2	5000-10000 PHP	Secondly	0		0		0	0		1	0								0	1	1	1	1	1	0	0	0
1181	0	1998-03-22	20	3	0	2018-07-25	4	0	2018-07-25	2018-07-22	3	2018-07-26	2018-07-28	4	145	145		1	2018-07-27	NCR	Manila	0	<5000 PHP	Tertiary	0	0	0		0	0		1	0								0	0	1	0	0	0	0	0	0
1182	1	1998-10-27	19	3	1	2018-07-25	4	1	2018-07-26	2018-07-21	4	2018-07-26	2018-07-30	6	140	1		1	2018-07-30	NCR	Valenzuela	1	<5000 PHP	Tertiary	0		0		0	0		1	0								0	1	0	0	0	0	0	1	1
1183	0	2004-09-12	13	2	1	2018-07-26	4	0	2018-07-26	2018-07-12	14	2018-07-27	2018-07-30	5	145	145		1	2018-07-30	NCR	Manila	0	<5000 PHP	Secondly	0		1	others	0	0		1	0								0	0	1	0	0	0	0	0	0
1184	0	1966-11-07	51	3	0	2018-07-27	4	0	2018-07-27	2018-07-22	5	2018-07-27	2018-07-27	1	0	145		1	2018-07-27	Region 3		2	5000-10000 PHP	Secondly	0	0	0		0	0		1	1	1	2018-07-26	1	20:00:00	B-lactamase Inhibitors	Co-Amoxiclav	Other Hospital	1	1	1	1	0	0	0	1	0
1185	0	1997-06-12	21	3	1	2018-07-27	4	0	2018-07-27	2018-07-24	3	2018-07-28	2018-07-30	4	145	145		1	2018-07-30	NCR	Manila	0	<5000 PHP	Secondly	0		0		2	1	9	1	0								0	0	1	0	0	0	0	0	0
1186	0	1972-05-14	46	3	1	2018-07-30	4	0	2018-07-30	2018-07-27	3	2018-07-30	2018-07-30	1	145	145		1	2018-07-30	NCR	Paranaque	1	<5000 PHP	Secondly	0		0		2	1	8	1	0								0	1	1	0	0	0	1	1	0
1187	0	1951-09-09	66	3	0	2018-07-30	4	0	2018-07-30	2018-07-27	3	2018-07-31	2018-08-09	11	145	145		1	2018-08-01	NCR	Caloocan	1	10000-15000 PHP	Secondly	1	0	1	others	0	0		1	0								0	0	1	0	0	1	0	1	0
1188	1	1980-07-29	38	3	1	2018-07-30	4	1	2018-07-31	2018-07-26	4	2018-07-31	2018-08-03	5	145	145		1	2018-07-31	Region 3		2	<5000 PHP	Secondly	0		0		0	0		1	0								0	0	1	0	0	0	0	0	0
1189	0	1962-09-13	55	3	1	2018-07-30	4	1	2018-07-31	2018-07-24	6	2018-08-01	2018-08-07	9	0	0		0		NCR	Quezon	1	<5000 PHP	Secondly	1		1	others	0	1	8	1	0								0	0	1	0	1	1	1	0	0
1190	0	1990-08-20	27	3	1	2018-07-31	4	0	2018-07-31	2018-07-29	2	2018-08-01	2018-08-06	7	0	0		1	2018-07-31	NCR	Caloocan	1	<5000 PHP	Secondly	0		1	others	2	1	12	1	0								0	1	1	1	0	0	0	0	0
1191	1	2011-09-10	6	2	1	2018-07-31	4	0	2018-07-31	2018-07-29	2	2018-08-01	2018-08-02	3	145	0		0		NCR	Paranaque	1	5000-10000 PHP	Secondly	0		1	others	0	0		1	0								0	0	0	0	0	0	1	0	0
1192	0	1970-07-11	48	3	1	2018-07-31	4	0	2018-07-31	2018-07-29	2	2018-08-01	2018-08-05	6	145	145		0		NCR	Manila	0	<5000 PHP	Secondly	0		0		2	0		1	0								0	0	1	0	0	0	1	0	0
1193	0	1996-12-16	21	3	1	2018-08-01	4	0	2018-08-01	2018-07-27	5	2018-08-02	2018-08-06	6	145	145		1	2018-08-03	NCR	Malabon	1	<5000 PHP	Secondly	0		0		2	1	15	1	0								0	1	1	1	0	0	1	1	0
1194	0	1988-07-16	30	3	1	2018-08-01	4	0	2018-08-01	2018-07-28	4	2018-08-02	2018-08-04	4	145	145		1	2018-08-01	NCR	Caloocan	1	10000-15000 PHP	Tertiary	0		0		2	1	10	1	0								0	0	1	0	0	0	1	0	0
1195	0	1966-10-16	51	3	0	2018-08-01	4	1	2018-08-02	2018-07-21	11	2018-08-03	2018-08-26	26	0	0		0		Region 4		2	10000-15000 PHP	Vocational	0	0	1	diabetes;others	0	0		1	0								0	1	1	0	1	0	0	0	0
1196	0	1990-09-11	27	3	1	2018-08-02	4	0	2018-08-02	2018-07-30	3	2018-08-02	2018-08-07	6	145	145		1	2018-08-06	NCR	Manila	0	<5000 PHP	Secondly	0		0		2	1	4	1	1	2	2018-08-02	0	08:00:00	B-lactamase Inhibitors	Co-Amoxiclav	Private Clinic	1	0	1	1	0	0	1	0	0
1197	0	2015-01-06	3	1	0	2018-08-03	4	0	2018-08-03	2018-08-02	1	2018-08-04	2018-08-18	16	0	0		0		NCR	Caloocan	1	5000-10000 PHP	Secondly	0	0	0		0	0		1	0								0	1	0	1	0	1	0	0	0
1198	0	1993-04-28	25	3	1	2018-08-03	4	0	2018-08-03	2018-07-31	3	2018-08-04	2018-08-09	7	145	145		1	2018-08-06	NCR	Quezon	1	<5000 PHP	Primary	0		0		1	1	8	1	0								0	0	1	1	0	0	1	0	0
1199	0	2012-04-15	6	2	1	2018-08-05	4	1	2018-08-06	2018-07-24	12	2018-08-06	2018-08-08	4	0	0		1	2018-08-08	NCR	Valenzuela	1	5000-10000 PHP	Secondly	0		0		0	0		1	1	7	2018-08-04	1	06:00:00	B-lactamase Inhibitors	Co-Amoxiclav	Private Clinic	1	0	1	1	0	0	0	0	0
1200	0	1998-04-03	20	3	1	2018-08-06	4	0	2018-08-06	2018-07-30	7	2018-08-08	2018-08-12	7	145	145		1	2018-08-06	NCR	Manila	0	<5000 PHP	Primary	0		0		2	0		1	0								0	1	1	0	0	0	0	1	0
1201	1	1999-07-08	19	3	1	2018-08-07	4	0	2018-08-07	2018-08-02	5	2018-08-08	2018-08-09	3	145	145		1	2018-08-07	NCR	Manila	0	<5000 PHP	Tertiary	0		0		2	0		1	1	3	2018-08-06	1	07:00:00	B-lactamase Inhibitors	Co-Amoxiclav	Private Clinic	1	0	1	0	0	0	1	0	0
1202	0	2001-05-29	17	2	1	2018-08-06	4	1	2018-08-07	2018-07-31	6	2018-08-07	2018-08-11	6	0	0		0		NCR	Taguig	1	5000-10000 PHP	Secondly	0		0		0	0		1	0								0	1	1	1	0	0	0	1	0
1203	1	2007-11-20	10	2	1	2018-08-07	4	0	2018-08-07	2018-08-05	2	2018-08-10	2018-08-16	10	145	145		0		NCR	Manila	0	5000-10000 PHP	Secondly	0		0		0	0		1	0								0	1	1	0	1	0	1	0	0
1204	0	1966-06-06	52	3	1	2018-08-07	4	0	2018-08-07	2018-08-01	6	2018-08-08	2018-08-10	4	145	145		1	2018-08-07	NCR	Quezon	1	<5000 PHP	Secondly	0		0		2	1	30	1	0								0	0	1	0	0	0	0	0	0
1205	0	2010-10-04	7	2	0	2018-08-08	4	0	2018-08-08	2018-08-04	4	2018-08-08	2018-08-08	1	145	145		0		NCR	Pasig	1	10000-15000 PHP	Tertiary	0	0	0		0	0		1	1	1	2018-08-08	0	06:00:00	Penicillines	Penicillin G	Other Hospital	1	1	0	0	0	0	0	1	0
1206	0	2016-12-19	1	1	1	2018-08-09	4	0	2018-08-09	2018-08-05	4	2018-08-10	2018-08-10	2	145.9	0		0		Region 4		2	<5000 PHP	Secondly	0		0		0	0		1	1	1	2018-08-09	0	08:00:00	Penicillines	Penicillin G	Other Hospital	1	1	0	0	0	0	1	1	0
1207	0	1992-09-04	25	3	1	2018-08-10	4	0	2018-08-10	2018-08-09	1	2018-08-11	2018-08-15	6	145	145		1	2018-08-13	NCR	Malabon	1	10000-15000 PHP	Vocational	0		0		2	0		1	0								0	0	1	0	0	0	1	0	0
1208	0	2015-12-10	2	1	0	2018-08-10	4	0	2018-08-10	2018-08-06	4	2018-08-11	2018-08-15	6	143	0		0		NCR	Taguig	1	<5000 PHP	Secondly	0	0	0		0	0		1	0								0	0	0	0	0	0	0	1	0
1209	0	2007-12-17	10	2	1	2018-08-12	4	1	2018-08-13	2018-08-02	10	2018-08-13	2018-08-21	10	0	0		1	2018-08-15	NCR	Navotas	1	<5000 PHP	Primary	0		0		0	0		1	0								0	0	1	0	0	0	1	0	0
1210	0	2017-03-30	1	1	0	2018-08-13	4	0	2018-08-13	2018-08-06	7	2018-08-15	2018-08-23	11	137	0		0		NCR	Manila	0	5000-10000 PHP	Secondly	0	0	0		0	0		1	0								0	0	0	0	1	1	1	1	0
1211	0	1980-09-03	37	3	1	2018-08-13	4	0	2018-08-13	2018-08-07	6	2018-08-19	2018-08-28	16	145	145		0		NCR	Manila	0	5000-10000 PHP	Secondly	0		0		2	1	30	1	0								0	0	1	0	0	0	0	1	0
1212	0	1975-08-30	42	3	1	2018-08-14	4	0	2018-08-14	2018-08-11	3	2018-08-15	2018-08-16	3	145	145		1	2018-08-14	NCR	Manila	0	5000-10000 PHP	Secondly	0		0		2	1	6	1	0								0	0	1	0	0	0	1	0	0
1213	1	1992-01-14	26	3	1	2018-08-13	4	1	2018-08-14	2018-08-09	4	2018-08-15	2018-08-18	6	145	145		1	2018-08-14	NCR	Caloocan	1	<5000 PHP	Tertiary	0		0		0	0		1	1	1	2018-08-10	3	09:00:00	Cephalosporines	Cephalexin	Pharmacy	0	0	1	0	0	0	0	0	0
1214	0	1996-08-14	22	3	1	2018-08-14	4	0	2018-08-14	2018-08-09	5	2018-08-14	2018-08-14	1	0	0		1	2018-08-14	NCR	Quezon	1	<5000 PHP	Tertiary	0		0		2	0		1	0								0	0	0	0	0	0	0	1	1
1215	1	1982-10-25	35	3	0	2018-08-13	4	1	2018-08-14	2018-08-07	6	2018-08-14	2018-08-17	5	145	145		1	2018-08-14	NCR	Paranaque	1	<5000 PHP	Secondly	0	0	0		0	0		1	0								0	1	1	0	1	1	0	0	0
1216	0	1974-02-06	44	3	1	2018-08-15	4	0	2018-08-15	2018-08-08	7	2018-08-16	2018-08-20	6	145	145		1	2018-08-15	NCR	Quezon	1	5000-10000 PHP	Secondly	0		0		2	0		1	0								0	0	1	0	0	0	0	0	0
1217	0	2002-01-23	16	2	1	2018-08-15	4	0	2018-08-15	2018-08-12	3	2018-08-16	2018-08-17	3	145	145		1	2018-08-15	NCR	Quezon	1	10000-15000 PHP	Tertiary	0		0		2	0		1	0								0	0	1	0	0	0	1	1	0
1218	0	2002-02-27	16	2	1	2018-08-15	4	0	2018-08-15	2018-08-14	1	2018-08-18	2018-08-21	7	144	144		1	2018-08-17	NCR	Manila	0	<5000 PHP	Secondly	0		0		0	0		1	0								0	0	1	0	0	0	0	0	0
1219	1	1992-12-28	25	3	1	2018-08-16	4	0	2018-08-16	2018-08-12	4	2018-08-17	2018-08-21	6	145	145		1	2018-08-16	NCR	Quezon	1	5000-10000 PHP	Secondly	0		0		2	1	8	1	0								0	0	1	0	0	0	1	0	0
1220	0	2013-06-26	5	2	1	2018-08-16	4	0	2018-08-16	2018-08-12	4	2018-08-17	2018-08-22	7	137	1		0		NCR	Manila	0	10000-15000 PHP	Tertiary	0		0		0	0		1	0								0	0	0	0	0	0	1	1	0
1221	0	1970-02-14	48	3	1	2018-08-17	4	0	2018-08-17	2018-08-12	5	2018-08-20	2018-09-19	34	145	145		1	2018-08-17	Region 4		2	10000-15000 PHP	Vocational	0		1	diabetes	1	0		1	1	1	2018-08-16	1	17:00:00	Macrolides	Azithromycin	Private Clinic	1	0	1	1	0	0	0	0	0
1222	0	1976-08-28	41	3	1	2018-08-20	4	0	2018-08-20	2018-08-13	7	2018-08-21	2018-08-24	5	145	145		1	2018-08-20	NCR	Pasay	1	10000-15000 PHP	Tertiary	0		0		0	0		1	1	2	2018-08-19	1	07:00:00	B-lactamase Inhibitors	Co-Amoxiclav	Other Hospital	1	0	1	0	1	1	1	0	0
1223	1	1996-09-18	21	3	1	2018-08-22	4	0	2018-08-22	2018-08-18	4	2018-08-23	2018-08-25	4	144	144		1	2018-08-24	Region 4		2	5000-10000 PHP	Secondly	0		0		2	1	4	1	0								0	1	1	0	0	0	0	0	0
1224	1	1996-06-04	22	3	1	2018-08-22	4	0	2018-08-22	2018-08-20	2	2018-08-23	2018-08-24	3	137	1		1	2018-08-22	NCR	Manila	0	<5000 PHP	Tertiary	0		1	others	0	0		1	1	1	2018-08-21	1	20:00:00	Penicillines	Amoxicillin	Pharmacy	1	0	1	1	0	0	0	1	0
1225	0	1992-09-12	25	3	1	2018-08-24	4	0	2018-08-24	2018-08-20	4	2018-08-25	2018-08-26	3	145	145		0		NCR	Manila	0	<5000 PHP	Primary	0		0		1	1	8	1	1	2	2018-08-24	0	07:00:00	B-lactamase Inhibitors	Co-Amoxiclav	Private Clinic	1	0	1	0	0	0	0	0	0
1226	0	1991-05-11	27	3	0	2018-08-24	4	0	2018-08-24	2018-08-22	2	2018-08-25	2018-10-12	50	145	145		0		NCR	Caloocan	1	<5000 PHP	Vocational	0	0	0		2	0		1	1	1	2018-08-21	3	09:00:00	Penicillines	Amoxicillin	Pharmacy	1	0	1	0	0	0	1	1	0
1227	1	1998-12-28	19	3	0	2018-08-27	4	1	2018-08-28	2018-08-23	4	2018-08-28	2018-08-29	3	145	145		0		NCR	Manila	0	5000-10000 PHP	Secondly	0	0	0		2	1	1	1	0								0	0	1	0	1	1	1	0	0
1228	0	1989-02-20	29	3	1	2018-08-28	4	0	2018-08-28	2018-08-23	5	2018-08-29	2018-08-31	4	145	145		1	2018-08-30	NCR	Manila	0	5000-10000 PHP	Secondly	0		0		0	0		1	0								0	0	1	1	0	0	1	0	0
1229	1	1979-03-06	39	3	1	2018-08-27	4	1	2018-08-28	2018-08-23	4	2018-08-30	2018-09-30	35	137	1		1	2018-08-28	NCR	Manila	0	<5000 PHP	Primary	0		0		0	0		1	0								0	1	1	0	0	0	0	0	0
1230	0	1960-05-18	58	3	1	2018-08-28	4	0	2018-08-28	2018-08-24	4	2018-08-29	2018-08-29	2	145	145		0		NCR	Quezon	1	<5000 PHP	Secondly	0		1	others	0	0		1	0								0	0	0	0	0	0	0	0	0
1231	0	1999-11-11	18	3	1	2018-08-28	4	0	2018-08-28	2018-08-23	5	2018-08-29	2018-09-10	14	145	145		1	2018-08-30	Region 4		2	<5000 PHP	Secondly	0		0		2	1	15	1	0								0	0	1	0	0	0	1	1	0
1232	0	1999-08-16	19	3	1	2018-08-29	4	0	2018-08-29	2018-08-24	5	2018-08-30	2018-09-01	4	145	145		1	2018-08-31	NCR	Manila	0	<5000 PHP	Secondly	0		0		0	1	4	1	0								0	1	1	0	0	0	0	0	0
1233	0	1998-08-04	20	3	1	2018-08-29	4	1	2018-08-30	2018-08-15	14	2018-09-07	2018-09-10	13	0	0		1	2018-09-03	NCR	Manila	0		Primary	0		0		2	1	15	1	1	2	2018-08-28	1	08:00:00	Cephalosporines	Cefixime	Other Hospital	1	0	1	0	0	0	1	0	0
1234	0	2014-08-28	4	1	1	2018-08-30	4	0	2018-08-30	2018-08-23	7	2018-09-02	2018-09-05	7	138	138		0		Region 4		2	<5000 PHP	Secondly	0		0		0	0		1	0								0	0	1	1	1	1	1	0	0
1235	0	2011-09-20	6	2	1	2018-08-31	4	0	2018-08-31	2018-08-27	4	2018-08-31	2018-08-31	1	137	137		0		Region 3		2	<5000 PHP	Primary	0		0		0	0		1	0								0	1	1	0	0	0	1	1	0
1236	0	2000-10-02	17	2	1	2018-09-02	4	1	2018-09-03	2018-08-26	7	2018-09-03	2018-09-08	7	145	145		1	2018-09-03	NCR	Manila	0	<5000 PHP	Secondly	0		0		2	0		1	0								0	1	1	0	0	0	0	1	1
1237	1	1980-07-02	38	3	0	2018-09-03	4	0	2018-09-03	2018-08-30	4	2018-09-04	2018-09-09	7	145	145		0		NCR	Manila	0	5000-10000 PHP	Tertiary	1	0	1	diabetes	0	0		1	1	1	2018-09-02	1	20:00:00	Penicillines	Amoxicillin	Pharmacy	0	1	1	0	0	0	1	0	0
1238	1	1991-04-24	27	3	0	2018-09-04	4	0	2018-09-04	2018-08-31	4	2018-09-05	2018-09-07	4	145	145		1	2018-09-04	NCR	Pasig	1	5000-10000 PHP	Secondly	0	0	0		2	1	3	1	0								0	0	1	0	0	1	0	0	0
1239	1	1999-10-20	18	3	1	2018-09-04	4	0	2018-09-04	2018-08-31	4	2018-09-05	2018-09-08	5	145	145		0		NCR	Paranaque	1	<5000 PHP	Secondly	0		0		2	1	8	1	0								0	0	1	0	0	1	1	0	0
1240	0	2009-08-14	9	2	1	2018-09-05	4	0	2018-09-05	2018-09-01	4	2018-09-06	2018-09-10	6	145	142		1	2018-09-07	NCR	Quezon	1	5000-10000 PHP	Primary	0		0		0	0		1	0								0	0	1	0	0	0	1	1	0
1241	0	1987-10-10	30	3	0	2018-09-05	4	0	2018-09-05	2018-09-01	4	2018-09-06	2018-09-09	5	145	145		1	2018-09-05	NCR	Caloocan	1	5000-10000 PHP	Secondly	0	0	1	others	0	0		1	0								0	0	1	0	0	0	0	1	0
1242	0	2006-10-13	11	2	0	2018-09-06	4	0	2018-09-06	2018-09-04	2	2018-09-07	2018-09-08	3	144	144		0		NCR	Manila	0	5000-10000 PHP	Vocational	0	0	0		0	0		1	0								0	0	1	0	0	0	1	1	0
1243	0	2016-12-16	1	1	0	2018-09-07	4	0	2018-09-07	2018-09-05	2	2018-09-08	2018-09-10	4	137	137		0		NCR	Manila	0	<5000 PHP	Secondly	0	0	0		0	0		1	0								0	0	1	1	0	0	0	0	0
1244	0	2016-05-30	2	1	1	2018-09-07	4	0	2018-09-07	2018-09-01	6	2018-09-08	2018-09-10	4	137	1		0		NCR	Caloocan	1	5000-10000 PHP	Tertiary	0		1	others	0	0		1	1	7	2018-09-07	0	07:00:00	B-lactamase Inhibitors	Co-Amoxiclav	Private Clinic	1	0	0	0	0	0	0	0	0
1245	0	2010-11-20	7	2	0	2018-09-10	4	0	2018-09-10	2018-08-27	14	2018-09-12	2018-09-16	7	143	143		1	2018-09-12	NCR	Manila	0	5000-10000 PHP	Tertiary	0	0	0		0	0		1	1	3	2018-09-09	1	15:00:00	Macrolides	Azithromycin	Private Clinic	1	0	0	0	0	0	1	1	0
1246	0	1988-12-13	29	3	1	2018-09-10	4	0	2018-09-10	2018-09-06	4	2018-09-12	2018-09-16	7	145	145		1	2018-09-11	NCR	Taguig	1	5000-10000 PHP	Secondly	0		0		0	0		1	1	1	2018-09-09	1		Cephalosporines	Cefuroxime	Other Hospital	1	0	1	1	0	0	1	1	0
1247	1	1996-12-14	21	3	0	2018-09-10	4	1	2018-09-11	2018-09-07	3	2018-09-12	2018-09-13	4	145	145		1	2018-09-13	NCR	Makati	1	<5000 PHP	Tertiary	0	0	0		0	0		1	0								0	1	1	0	0	1	0	0	0
1248	1	1978-02-09	40	3	1	2018-09-10	4	1	2018-09-11	2018-09-07	3	2018-09-12	2018-09-14	5	145	145		0	2018-09-13	NCR	Manila	0	5000-10000 PHP	Secondly	0		0		0	1	12	1	0								0	1	1	0	0	1	0	0	0
1249	0	1998-10-11	19	3	1	2018-09-12	4	0	2018-09-12	2018-08-29	14	2018-09-13	2018-09-16	5	145	145		1	2018-09-14	NCR	Manila	0	<5000 PHP	Vocational	0		0		2	1	9	1	1	4	2018-09-09	3	08:00:00	Penicillines	Amoxicillin	Pharmacy	0	0	1	0	0	0	0	0	0
1250	1	1996-11-12	21	3	0	2018-09-12	4	0	2018-09-12	2018-09-09	3	2018-09-13	2018-09-17	6	145	145		1	2018-09-12	NCR	Caloocan	1	5000-10000 PHP	Tertiary	0	0	1	others	0	0		1	0								0	0	1	0	0	1	1	1	0
1251	0	1990-11-20	27	3	1	2018-09-13	4	0	2018-09-13	2018-09-07	6	2018-09-15	2018-09-21	9	145	145		1	2018-09-14	NCR	Manila	0	<5000 PHP	Primary	0		0		1	1	10	1	1	1	2018-09-13	0	02:00:00	Fluoroqunolones	Ciprofloxacin	Private Clinic	1	0	1	0	0	0	0	1	0
1252	0	2011-03-31	7	2	0	2018-09-13	4	0	2018-09-13	2018-09-10	3	2018-09-14	2018-09-15	3	140	140		0		NCR	Caloocan	1	5000-10000 PHP	Secondly	0	0	0		0	0		1	1	1	2018-09-12	1	15:00:00	Cephalosporines	Cefuroxime	Others	1	0	1	1	0	0	0	1	0
1253	0	2011-12-31	6	2	1	2018-09-13	4	1	2018-09-14	2018-08-31	13	2018-09-14	2018-09-16	4	0	0		0		NCR	Makati	1	10000-15000 PHP	Secondly	0		0		0	0		1	0								0	0	1	0	0	1	0	0	0
1254	0	2004-07-17	14	2	0	2018-09-14	4	0	2018-09-14	2018-09-09	5	2018-09-15	2018-09-16	3	145	145		0		NCR	Manila	0	5000-10000 PHP	Secondly	0	0	0		0	0		1	1	3	2018-09-14	0	06:00:00	Cephalosporines	Cefuroxime	Private Clinic	1	0	1	0	0	0	0	0	0
1255	0	2014-01-05	4	1	0	2018-09-17	4	0	2018-09-17	2018-09-15	2	2018-09-19	2018-09-22	6	0	1		1	2018-09-17	NCR	Malabon	1	5000-10000 PHP	Secondly	0	0	1	others	0	0		1	1	2	2018-09-17	0	06:00:00	Penicillines	Cloxacillin	Other Hospital	1	1	0	0	1	0	1	0	0
1256	1	1992-07-07	26	3	1	2018-09-18	4	0	2018-09-18	2018-09-13	5	2018-09-19	2018-09-19	2	145	145		1	2018-09-18	Region 4		2	<5000 PHP	Secondly	0		0		2	0		1	0								0	1	0	0	0	1	0	0	0
1257	0	1997-11-23	20	3	0	2018-09-18	4	0	2018-09-18	2018-09-13	5	2018-09-20	2018-09-27	10	143	143		1	2018-09-18	NCR	Manila	0	<5000 PHP	Secondly	0	0	0		0	0		1	0								0	1	1	0	0	0	0	0	0
1258	1	2002-06-16	16	2	0	2018-09-18	4	0	2018-09-18	2018-09-13	5	2018-09-19	2018-09-24	7	145	145		0		NCR	Manila	0	<5000 PHP	Secondly	0	0	0		0	0		1	1	1	2018-09-18	0	17:00:00	Unknown	Unknown	Private Clinic	1	0	1	0	0	0	1	0	0
1259	1	1997-11-23	20	3	1	2018-09-19	4	0	2018-09-19	2018-09-15	4	2018-09-20	2018-09-23	5	145	145		1	2018-09-19	NCR	Manila	0	<5000 PHP	Secondly	0		0		2	1	3	1	0								0	0	1	0	0	1	0	1	0
1260	0	1962-05-01	56	3	1	2018-09-20	4	0	2018-09-20	2018-09-13	7	2018-09-22	2018-09-24	5	145	145		1	2018-09-24	NCR	Las Pinas	1	10000-15000 PHP	Secondly	0		0		0	0		1	0								0	1	1	0	0	0	0	1	0
1261	0	1981-11-28	36	3	0	2018-09-20	4	0	2018-09-20	2018-09-17	3	2018-09-21	2018-09-24	5	142	142		1	2018-09-20	NCR	Malabon	1	5000-10000 PHP	Tertiary	0	0	1	others	2	1	8	1	0								0	1	1	0	0	0	0	1	0
1262	0	1990-08-29	28	3	0	2018-09-21	4	0	2018-09-21	2018-09-18	3	2018-09-22	2018-09-25	5	145	145		1	2018-09-24	NCR	Malabon	1	<5000 PHP	Secondly	0	0	0		0	0		1	0								0	1	1	1	0	1	0	1	0
1263	0	2014-08-10	4	1	1	2018-09-21	4	0	2018-09-21	2018-09-16	5	2018-09-23	2018-09-27	7	138	138		1	2018-09-21	NCR	Manila	0	<5000 PHP	Primary	0		0		0	0		1	0								0	0	0	0	0	0	1	0	0
1264	0	2007-11-26	10	2	0	2018-09-20	4	1	2018-09-21	2018-09-18	2	2018-09-22	2018-09-28	9	0	0		0		NCR	Quezon	1	<5000 PHP	Secondly	0	0	1	others	0	0		1	0								0	0	1	0	0	0	1	1	0
1265	0	2012-09-11	6	2	1	2018-09-24	4	0	2018-09-24	2018-09-11	13	2018-10-26	2018-10-02	9	139	139		1	2018-09-24	NCR	Manila	0	<5000 PHP	Secondly	0		0		0	0		1	1	5	2018-09-16	8	08:00:00	Cephalosporines	Cephalexin	Other Hospital	1	1	1	1	0	0	0	0	0
1266	0	1998-09-05	20	3	1	2018-09-24	4	0	2018-09-24	2018-09-18	6	2018-09-25	2018-09-27	4	144	144		1	2018-09-26	NCR	Paranaque	1	5000-10000 PHP	Secondly	0		0		2	0		1	0								0	0	1	0	1	1	0	0	0
1267	1	1999-05-04	19	3	1	2018-09-24	4	1	2018-09-25	2018-09-22	2	2018-09-25	2018-09-29	6	145	145		1	2018-09-27	NCR	Caloocan	1	<5000 PHP	Secondly	0		0		2	1	3	1	0								0	1	0	0	0	0	1	0	0
1268	1	1996-08-14	22	3	1	2018-09-24	4	1	2018-09-25	2018-09-21	3	2018-09-26	2018-09-28	5	145	145		1	2018-09-27	NCR	Manila	0	5000-10000 PHP	Secondly	0		0		2	1	3	1	1	2	2018-09-24	0	12:00:00	Unknown	Unknown	Pharmacy	1	1	0	0	0	0	0	0	0
1269	1	2000-05-18	18	3	1	2018-09-26	4	0	2018-09-26	2018-09-19	7	2018-09-27	2018-09-29	4	145	145		1	2018-09-28	Region 4		2	<5000 PHP	Primary	0		0		0	0		1	0								0	1	1	0	1	1	1	0	0
1270	0	2000-01-09	18	3	0	2018-09-26	4	0	2018-09-26	2018-09-21	5	2018-09-27	2018-09-27	2	145	145		1	2018-09-26	NCR	Manila	0	<5000 PHP	Secondly	0	0	0		0	0		1	0								0	0	1	0	0	0	0	0	0
1271	0	1970-08-13	48	3	0	2018-09-26	4	1	2018-09-27	2018-09-25	1	2018-09-28	2018-10-04	9	145	145		0		NCR	Caloocan	1	5000-10000 PHP	Secondly	0	0	0		0	0		1	0								0	1	1	1	1	1	0	0	0
1272	0	2011-12-31	6	2	0	2018-09-26	4	1	2018-09-27	2018-09-23	3	2018-09-27	2018-09-29	4	137	137		0		NCR	Manila	0	10000-15000 PHP	Secondly	0	0	0		0	0		1	1	1	2018-09-26	0		Cephalosporines	Cefuroxime	Public health center	1	0	1	0	1	1	0	0	0
1273	0	1955-11-23	62	3	1	2018-09-27	4	0	2018-09-27	2018-09-23	4	2018-09-27	2018-09-27	1	145	145		0		NCR	Manila	0	5000-10000 PHP	Secondly	0		0		2	1	1	1	0								0	1	1	0	0	0	0	0	0
1274	0	1978-02-26	40	3	1	2018-09-28	4	0	2018-09-28	2018-09-21	7	2018-09-29	2018-10-04	7	145	145		1	2018-10-01	NCR	Quezon	1	5000-10000 PHP	Secondly	0		0		2	0		1	0								0	0	1	0	0	0	0	0	0
1275	0	1967-04-06	51	3	1	2018-09-28	4	0	2018-09-28	2018-09-24	4	2018-09-29	2018-10-02	5	145	145		1	2018-10-01	NCR	Manila	0	5000-10000 PHP	Secondly	1		1	others	0	1	1	1	1	1	2018-09-27	1	08:00:00	Fluoroqunolones	Levofloxacin	Private Clinic	1	1	1	0	0	0	1	1	0
1276	0	2000-01-09	18	3	1	2018-09-28	4	0	2018-09-28	2018-09-27	1	2018-09-30	2018-10-08	11	145	145		0		NCR	Quezon	1	5000-10000 PHP	Secondly	0		0		2	0		1	0								0	1	1	0	0	0	0	1	0
1277	0	2016-08-15	2	1	1	2018-10-01	4	0	2018-10-01	2018-09-28	3	2018-10-02	2018-10-05	5	143	137		0		NCR	Manila	0	5000-10000 PHP	Secondly	1		1	others	0	0		1	0								0	0	0	0	0	0	1	1	0
1278	1	1990-10-30	27	3	1	2018-10-01	4	1	2018-10-02	2018-09-29	2	2018-10-02	2018-10-05	5	145	145		1	2018-10-04	Region 3		2	<5000 PHP	Primary	0		0		2	0		1	0								0	1	1	0	0	0	1	0	0
1279	1	1986-09-16	32	3	1	2018-10-02	4	0	2018-10-02	2018-09-30	2	2018-10-03	2018-10-05	4	145	145		1	2018-10-04	NCR	Quezon	1	10000-15000 PHP	Tertiary	0		0		2	0		1	0								0	0	1	0	0	1	0	0	0
1280	0	1996-03-31	22	3	1	2018-10-03	4	0	2018-10-03	2018-09-30	3	2018-10-04	2018-10-07	5	145	145		1	2018-10-05	NCR	Quezon	1	<5000 PHP	Secondly	0		0		2	0		1	0								0	0	1	0	0	0	0	0	0
1281	0	2014-07-26	4	1	1	2018-10-03	4	0	2018-10-03	2018-10-02	1	2018-10-06	2018-10-17	15	137	137		0	2018-10-05	NCR	Caloocan	1	5000-10000 PHP	Primary	0		1	others	0	0		1	1	1	2018-10-03	0	07:00:00	Cephalosporines	Cefixime	Others	1	0	0	0	0	0	1	1	0
1282	0	1982-01-27	36	3	0	2018-10-04	4	0	2018-10-04	2018-09-30	4	2018-10-05	2018-10-08	5	145	145		1	2018-10-05	NCR	Quezon	1	<5000 PHP	Secondly	0	0	0		0	0		1	0								0	0	1	1	1	1	0	0	0
1283	0	2007-03-31	11	2	0	2018-10-04	4	0	2018-10-04	2018-10-01	3	2018-10-05	2018-10-18	15	137	137		1	2018-10-08	NCR	Caloocan	1	5000-10000 PHP	Secondly	0	0	0		0	0		1	1	2	2018-10-03	1	21:00:00	Penicillines	Amoxicillin	Public health center	1	1	1	0	0	0	1	0	0
1284	0	1978-01-21	40	3	1	2018-10-04	4	0	2018-10-04	2018-09-30	4	2018-10-06	2018-10-14	11	145	145		1	2018-10-08	NCR	Paranaque	1	5000-10000 PHP	Primary	0		0		1	1	15	1	1	1	2018-10-04	0	08:00:00	Fluoroqunolones	Ofloxacin	Private Clinic	1	0	1	0	0	0	1	1	0
1285	0	1938-04-24	80	3	0	2018-10-05	4	0	2018-10-05	2018-09-15	20	2018-10-06	2018-10-11	7	138	138		0		NCR	Valenzuela	1	<5000 PHP	Primary	1	0	1	others	0	0		1	1	7	2018-10-04	1	20:00:00	B-lactamase Inhibitors	Others	Other Hospital	1	1	0	0	0	0	0	0	0
1286	0	1952-01-23	66	3	0	2018-10-08	4	0	2018-10-08	2018-10-01	7	2018-10-10	2018-10-20	13	145	145		0		NCR	Quezon	1	<5000 PHP	Primary	0	0	0	others	0	0		1	0								0	1	0	0	1	0	1	0	0
1287	1	1997-10-13	20	3	1	2018-10-09	4	0	2018-10-09	2018-10-04	5	2018-10-10	2018-10-11	3	145	145		1	2018-10-09	NCR	Caloocan	1	<5000 PHP	Secondly	0		0		0	0		1	1	3	2018-10-06	3	20:00:00	Cephalosporines	Cefuroxime	Private Clinic	1	1	0	0	1	1	0	0	0
1288	1	1985-01-14	33	3	1	2018-10-08	4	1	2018-10-09	2018-10-04	4	2018-10-09	2018-10-11	4	145	145		1	2018-10-09	NCR	Quezon	1	5000-10000 PHP	Secondly	0		0		2	0		1	0								0	0	1	0	1	1	0	0	0
1289	0	2009-12-31	8	2	0	2018-10-10	4	0	2018-10-10	2018-10-07	3	2018-10-11	2018-10-14	5	138	138		1	2018-10-12	NCR	Caloocan	1	5000-10000 PHP	Tertiary	0	0	0		0	0		1	0								0	0	1	0	0	0	1	0	0
1290	0	1983-11-24	34	3	0	2018-10-10	4	0	2018-10-10	2018-10-03	7	2018-10-11	2018-10-15	6	145	145		1	2018-10-12	NCR	Manila	0	<5000 PHP	Tertiary	0	0	0		2	0		1	0								0	0	1	0	0	0	0	0	0
1291	0	2007-04-12	11	2	1	2018-10-10	4	0	2018-10-10	2018-10-04	6	2018-10-12	2018-10-21	12	141	139		1	2018-10-12	NCR	Manila	0	10000-15000 PHP	Tertiary	0		0		0	0		1	1	5	2018-10-10	0	08:00:00	Macrolides	Others	Private Clinic	1	0	1	0	0	0	1	1	0
1292	0	1991-10-23	26	3	0	2018-10-11	4	0	2018-10-11	2018-09-26	15	2018-10-12	2018-10-17	7	138	138		1	2018-10-11	NCR	Paranaque	1	<5000 PHP	Secondly	0	0	1	others	0	0		1	1	3	2018-10-10	1	22:00:00	Cephalosporines	Cephalexin	Other Hospital	1	0	1	1	0	0	1	1	0
1293	0	2006-01-30	12	2	0	2018-10-12	4	0	2018-10-12	2018-10-08	4	2018-10-13	2018-10-15	4	141	141		1	2018-10-15	NCR	Caloocan	1	15000-20000 PHP	Secondly	0	0	0		0	0		1	1	2	2018-10-09	3	12:00:00	Cephalosporines	Cefuroxime	Others	1	0	1	0	0	1	0	0	0
1294	0	2010-07-14	8	2	1	2018-10-12	4	0	2018-10-12	2018-10-05	7	2018-10-13	2018-10-15	4	138	138		1	2018-10-15	NCR	Paranaque	1	5000-10000 PHP	Secondly	0		0		0	0		0	0								0	0	1	0	0	0	0	0	0
1295	0	1998-08-16	20	3	1	2018-10-14	4	1	2018-10-15	2018-10-11	3	2018-10-15	2018-10-20	7	145	144		1	2018-10-15	Region 3		2	<5000 PHP	Tertiary	0		0		0	0		1	0								0	0	1	1	0	0	0	0	0
1296	0	2005-10-26	12	2	1	2018-10-15	4	0	2018-10-15	2018-10-08	7	2018-10-16	2018-10-19	5	145	145		1	2018-10-15	NCR	Manila	0	5000-10000 PHP	Secondly	0		0		0	0		1	0								0	1	1	0	0	1	0	0	0
1297	0	2014-07-15	4	1	1	2018-10-16	4	0	2018-10-16	2018-10-02	14	2018-10-17	2018-10-20	5	138	138		0		NCR	Manila	0	5000-10000 PHP	Secondly	0		0		0	0		1	0								0	0	0	0	0	0	1	1	0
1298	1	2010-10-24	7	2	1	2018-10-16	4	0	2018-10-16	2018-10-11	5	2018-10-17	2018-10-18	3	145	145		1	2018-10-18	NCR	Manila	0	5000-10000 PHP	Secondly	0		0		0	0		1	0								0	0	1	0	0	0	0	0	0
1299	1	1999-03-08	19	3	1	2018-10-16	4	0	2018-10-16	2018-10-12	4	2018-10-17	2018-10-19	4	145	145		1	2018-10-16	NCR	Manila	0	5000-10000 PHP	Tertiary	0		0		0	0		1	0								0	0	1	0	0	0	0	0	0
1300	0	1981-04-18	37	3	1	2018-10-16	4	0	2018-10-16	2018-10-02	14	2018-10-18	2018-10-25	10	145	145		1	2018-10-16	NCR	Caloocan	1	<5000 PHP	Primary	0		0		2	1	9	1	1	9	2018-10-15	1	20:00:00	B-lactamase Inhibitors	Co-Amoxiclav	Other Hospital	1	0	1	0	0	0	1	1	0
1301	0	2005-09-26	13	2	1	2018-10-15	4	1	2018-10-16	2018-10-12	3	2018-10-16	2018-10-20	6	0	0		1	2018-10-16	NCR	Manila	0	5000-10000 PHP	Vocational	0		0		0	0		1	1	3	2018-10-15	0	08:00:00	Cephalosporines	Cefuroxime	Private Clinic	1	0	0	0	0	0	0	0	0
1302	0	2011-09-25	7	2	0	2018-10-17	4	0	2018-10-17	2018-10-10	7	2018-10-18	2018-10-21	5	137	137		0		Region 4		2	5000-10000 PHP	Secondly	0	0	0		0	0		1	0								0	0	0	0	0	0	1	1	0
1303	0	2002-03-27	16	2	1	2018-10-17	4	0	2018-10-17	2018-10-14	3	2018-10-19	2018-10-23	7	145	142		1	2018-10-19	Region 3		2	5000-10000 PHP	Secondly	0		0		2	1	9	1	1	1	2018-10-15	2	08:00:00	Penicillines	Amoxicillin	Pharmacy	0	0	1	1	1	1	0	0	0
1304	0	1958-05-26	60	3	1	2018-10-17	4	0	2018-10-17	2018-10-03	14	2018-10-18	2018-10-31	15	1	0		1	2018-10-19	NCR	Mandaluyong	1	5000-10000 PHP	Secondly	0		0		2	1	4	1	0								0	0	1	1	0	0	0	0	0
1305	0	1985-05-29	33	3	1	2018-10-17	4	0	2018-10-17	2018-10-12	5	2018-10-19	2018-10-31	15	0	0		0		Region 7		2	5000-10000 PHP	Secondly	0		0		0	1	8	1	0								0	0	1	1	0	0	1	1	0
1306	0	1991-05-23	27	3	1	2018-10-18	4	0	2018-10-18	2018-10-13	5	2018-10-19	2018-10-21	4	145	145		0		NCR	Caloocan	1	5000-10000 PHP	Secondly	0		0		0	0		1	1								0	0	0	0	0	0	1	0	0
1307	0	2009-02-18	9	2	1	2018-10-17	4	1	2018-10-18	2018-10-12	5	2018-10-18	2018-10-25	9	0	0		1	2018-10-22	NCR	Taguig	1	5000-10000 PHP	Secondly	0		0		0	0		1	1	1	2018-10-16	1		B-lactamase Inhibitors	Co-Amoxiclav	Pharmacy	1	0	0	0	0	0	1	1	0
1308	0	2014-08-19	4	1	1	2018-10-19	4	0	2018-10-19	2018-10-16	3	2018-10-20	2018-10-25	7	0	0		0		NCR	Manila	0	10000-15000 PHP	Tertiary	0		0		0	0		1	0								0	1	0	0	0	0	1	1	0
1309	0	1979-05-26	39	3	0	2018-10-19	4	0	2018-10-19	2018-10-18	1	2018-10-21	2018-10-27	9	0	0		1	2018-10-19	Region 4		2	10000-15000 PHP	Tertiary	0	0	0		0	0		1	0								0	1	1	1	0	0	0	0	0
1310	0	1986-11-13	31	3	1	2018-10-22	4	0	2018-10-22	2018-10-15	7	2018-10-23	2018-10-27	6	145	145		1	2018-10-24	NCR	Manila	0	5000-10000 PHP	Primary	0		0		2	1	4	1	0								0	0	1	0	0	0	1	1	0
1311	0	1975-02-06	43	3	0	2018-10-22	4	0	2018-10-22	2018-10-08	14	2018-10-23	2018-11-01	11	145	145		1	2018-10-24	Region 3		2	<5000 PHP	Secondly	1	0	1	others	0	0		1	1	4	2018-10-18	4			Sultamicilin	Other Hospital	1	0	0	0	0	0	0	0	0
1312	0	1979-01-15	39	3	1	2018-10-22	4	1	2018-10-23	2018-10-22	0	2018-10-23	2018-11-05	15	0	0		1	2018-10-23	Region 4		2	<5000 PHP	Tertiary	0	1	0		2	1	6	1	1	1	2018-10-22	0	15:00:00	Cephalosporines	Ceftriaxoxe	Other Hospital	1	1	1	1	1	1	0	1	0
1313	1	1990-06-25	28	3	0	2018-10-23	4	0	2018-10-23	2018-10-20	3	2018-10-24	2018-10-27	5	145	145		1	2018-10-23	NCR	Paranaque	1	<5000 PHP	Tertiary	0	0	0		0	0		1	0								0	1	1	0	0	0	0	0	0
1314	1	1993-06-29	25	3	1	2018-10-23	4	0	2018-10-23	2018-10-20	3	2018-10-24	2018-10-26	4	145	145		1	2018-10-25	Region 4		2	5000-10000 PHP	Primary	0		1	others	2	0		1	0								0	0	1	0	0	0	0	0	0
1315	0	1983-01-27	35	3	0	2018-10-23	4	0	2018-10-23	2018-10-21	2	2018-10-25	2018-10-25	3	145	145		0		NCR	Caloocan	1	<5000 PHP	Primary	1	0	1	others	0	0		0	0								0	1	0	0	1	1	1	0	0
1316	0	1993-08-12	25	3	0	2018-10-24	4	0	2018-10-24	2018-10-19	5	2018-10-25	2018-10-26	3	145	145		1	2018-10-26	Region 4		2	<5000 PHP	Primary	0	0	0		0	0		1	0								0	0	1	0	1	1	1	0	0
1317	1	1996-06-28	22	3	1	2018-10-24	4	0	2018-10-24	2018-10-21	3	2018-10-26	2018-10-27	4	145	145		1	2018-10-26	NCR	Valenzuela	1	5000-10000 PHP	Secondly	0		0		2	1	9	1	0								0	0	1	0	0	0	0	0	0
1318	0	2000-05-27	18	3	0	2018-10-25	4	0	2018-10-25	2018-10-19	6	2018-10-25	2018-10-25	1	145	145		0		NCR	Caloocan	1	<5000 PHP	Vocational	0	0	0		0	0		1	0								0	1	1	0	1	1	1	1	1
1319	0	1986-11-24	31	3	0	2018-10-25	4	1	2018-10-26	2018-10-15	10	2018-10-26	2018-10-28	4	0	0		0		NCR	Makati	1	<5000 PHP	Secondly	0	0	0		0	0		1	0								0	0	1	1	1	1	0	1	0
1320	0	2012-09-12	6	2	0	2018-10-26	4	0	2018-10-26	2018-10-23	3	2018-10-27	2018-11-01	7	0	0		0		NCR	Manila	0	5000-10000 PHP	Secondly	0	0	0		0	0		1	0								0	1	0	0	0	0	0	0	0
1321	0	1984-01-07	34	3	0	2018-10-28	4	1	2018-10-29	2018-10-21	7	2018-10-29	2018-11-01	5	0	0		1	2018-10-29	NCR	Paranaque	1	10000-15000 PHP	Tertiary	0	0	0		0	0		1	1	3	2018-10-28	0	21:00:00	B-lactamase Inhibitors	Co-Amoxiclav	SLH	1	0	1	0	0	0	0	0	0
1322	0	1987-01-29	31	3	0	2018-10-31	4	0	2018-10-31	2018-10-03	28	2018-11-04	2018-11-07	8	145	142		1	2018-10-31	NCR	Taguig	1	<5000 PHP	Secondly	0	0	1	others	2	0		1	0								0	0	1	1	0	0	0	1	0
1323	0	1971-05-03	47	3	1	2018-11-05	4	0	2018-11-05	2018-11-01	4	2018-11-06	2018-11-11	7	145	145		1	2018-11-05	Region 3		2	10000-15000 PHP	Tertiary	0		0		2	0		1	0								0	0	1	1	1	0	0	0	0
1324	0	1990-11-27	27	3	1	2018-11-05	4	0	2018-11-05	2018-11-01	4	2018-11-07	2018-11-10	6	145	145		0		NCR	Manila	0	5000-10000 PHP	Secondly	0		0		2	1	8	1	1	7	2018-11-05	0	07:00:00	Unknown	Unknown	Private Clinic	1	0	0	0	1	1	0	0	0
1325	1	2013-10-17	5	2	1	2018-11-06	4	0	2018-11-06	2018-11-04	2	2018-11-07	2018-11-13	8	138	138		1	2018-11-08	NCR	Manila	0	5000-10000 PHP	Secondly	0		0		0	0		1	0								0	0	1	0	0	0	0	0	0
1326	1	1997-10-05	21	3	1	2018-11-06	4	0	2018-11-06	2018-11-04	2	2018-11-07	2018-11-08	3	145	145		1	2018-11-08	NCR	Malabon	1	10000-15000 PHP	Tertiary	0		0		2	1	15	1	1	1	2018-11-05	1	18:00:00	Fluoroqunolones	Levofloxacin	Private Clinic	1	0	1	0	0	0	0	0	0
1327	0	1985-09-11	33	3	0	2018-11-07	4	0	2018-11-07	2018-10-31	7	2018-11-12	2018-11-19	13	145	145		1	2018-11-07	NCR	Manila	0	5000-10000 PHP	Tertiary	0	0	0		0	0		1	0								0	0	1	1	0	1	1	0	0
1328	1	1987-01-18	31	3	1	2018-11-06	4	1	2018-11-07	2018-11-02	4	2018-11-07	2018-11-10	5	0	0		1	2018-11-09	NCR	Malabon	1	5000-10000 PHP	Tertiary	0		0		2	1	1	1	0								0	1	1	0	0	1	1	1	0
1329	0	1971-01-26	47	3	0	2018-11-07	4	0	2018-11-07	2018-11-06	1	2018-11-08	2018-11-12	6	145	145		1	2018-11-08	NCR	Navotas	1	<5000 PHP	Secondly	0	0	0		0	0		1	0								0	1	1	1	0	0	0	1	0
1330	0	1980-09-03	38	3	1	2018-11-07	4	1	2018-11-08	2018-11-04	3	2018-11-09	2018-11-10	4	0	0		1	2018-11-08	NCR	Manila	0	5000-10000 PHP	Primary	0		0		2	1	2	1	1	3	2018-11-07	0	07:00:00	Penicillines	Amoxicillin	Pharmacy	1	0	1	0	0	0	1	1	0
1331	0	2007-01-20	11	2	0	2018-11-08	4	0	2018-11-08	2018-10-26	13	2018-11-09	2018-11-12	5	139	139		1	2018-11-12	NCR	Manila	0	5000-10000 PHP	Primary	0	0	0		0	0		1	0								0	0	1	0	0	1	1	1	0
1332	0	1998-01-21	20	3	0	2018-11-09	4	0	2018-11-09	2018-11-04	5	2018-11-10	2018-11-14	6	145	145		0		NCR	Taguig	1	5000-10000 PHP	Secondly	0	0	0		0	0		1	0								0	1	1	0	1	1	1	1	0
1333	0	2012-04-26	6	2	1	2018-11-12	4	0	2018-11-12	2018-11-05	7	2018-11-13	2018-11-20	9	139	139		1	2018-11-14	NCR	Manila	0	10000-15000 PHP	Secondly	0		0		0	0		1	1	3	2018-11-11	1	20:00:00	B-lactamase Inhibitors	Co-Amoxiclav	Public health center	1	0	0	0	0	0	1	1	0
1334	1	1998-03-29	20	3	1	2018-11-13	4	0	2018-11-13	2018-11-10	3	2018-11-14	2018-11-16	4	145	145		1	2018-11-15	NCR	Malabon	1	<5000 PHP	Tertiary	0		1	others	0	0		1	0								0	0	1	0	0	0	0	0	1
1335	1	2003-01-30	15	2	1	2018-11-13	4	0	2018-11-13	2018-11-08	5	2018-11-15	2018-11-17	5	145	145		1	2018-11-15	NCR	Manila	0	5000-10000 PHP	Tertiary	0		0		0	0		1	0								0	0	1	0	0	0	1	1	1
1336	0	2004-08-15	14	2	1	2018-11-13	4	0	2018-11-13	2018-11-10	3	2018-11-14	2018-11-20	8	145	145		1	2018-11-15	NCR	Manila	0	5000-10000 PHP	Secondly	0		0		0	0		1	1	2	2018-11-13	0	15:00:00	Cephalosporines	Cefuroxime	Private Clinic	1	0	1	0	0	0	0	0	0
1337	0	1992-06-10	26	3	1	2018-11-14	4	0	2018-11-14	2018-11-08	6	2018-11-15	2018-11-18	5	145	145		1	2018-11-16	NCR	Caloocan	1	<5000 PHP	Secondly	0		0		2	0		1	0								0	0	1	1	1	1	1	1	0
1338	0	2015-05-31	3	1	0	2018-11-14	4	0	2018-11-14	2018-11-01	13	2018-11-15	2018-11-18	5	137	137		0		NCR	Quezon	1	5000-10000 PHP	Secondly	0	0	0		0	0		1	0								0	0	0	0	0	1	1	0	0
1339	0	1994-02-14	24	3	1	2018-11-14	4	1	2018-11-15	2018-11-10	4	2018-11-16	2018-11-18	5	145	145		1	2018-11-15	NCR	Manila	0	<5000 PHP	Secondly	0		0		0	1	9	1	0								0	0	1	0	0	0	1	0	1
1340	0	1973-07-15	45	3	1	2018-11-15	4	1	2018-11-16	2018-11-05	10	2018-11-25	2018-11-25	11	145	145		1	2018-11-16	NCR	Manila	0	10000-15000 PHP	Secondly	0		1		2	1	15	1	0								0	0	1	0	0	0	1	0	0
1341	0	1965-04-25	53	3	1	2018-11-16	4	0	2018-11-16	2018-11-12	4	2018-11-17	2018-11-24	9	137	1		1	2018-11-19	NCR	Quezon	1	<5000 PHP	none	0		0		2	1	3	1	0								0	0	0	0	0	0	1	0	0
1342	0	1958-03-15	60	3	0	2018-11-19	4	0	2018-11-19	2018-11-14	5	2018-11-20	2018-11-29	11	145	145		1	2018-11-21	NCR	Quezon	1	<5000 PHP	Primary	0	0	0		0	0		0	0								0	0	1	0	0	0	0	1	0
1343	0	2012-09-09	6	2	1	2018-11-20	4	0	2018-11-20	2018-11-10	10	2018-11-21	2018-12-01	12	0	0		1	2018-11-22	Region 4		2	5000-10000 PHP	Secondly	0		0		0	0		1	0	2	2018-11-13	7	08:00:00	Unknown	Unknown	Other Hospital	1	1	0	0	1	1	0	0	0
1344	1	2002-01-30	16	2	0	2018-11-20	4	0	2018-11-20	2018-11-15	5	2018-11-21	2018-11-24	5	145	145		1	2018-11-22	NCR	Paranaque	1	5000-10000 PHP	Secondly	0	0	0		0	0		1	0								0	0	1	0	0	1	0	0	0
1345	0	2005-07-29	13	2	1	2018-11-20	4	0	2018-11-20	2018-11-19	1	2018-11-21	2018-11-22	3	137	137		1	2018-11-22	NCR	Manila	0	5000-10000 PHP	Tertiary	0		0		0	0		1	0								0	0	1	0	0	0	0	0	0
1346	1	1972-06-15	46	3	1	2018-11-21	4	0	2018-11-21	2018-11-19	2	2018-11-22	2018-11-24	4	145	145		1	2018-11-23	Region 4		2	5000-10000 PHP	Secondly	1		1	others	0	1	8	1	0								0	0	1	0	0	0	0	0	0
1347	0	1991-08-17	27	3	0	2018-11-21	4	0	2018-11-21	2018-11-07	14	2018-11-22	2018-11-28	8	145	145		1	2018-11-23	NCR	Manila	0	15000-20000 PHP	Tertiary	0	0	0		0	0		1	1	7	2018-11-17	4	07:00:00	Cephalosporines	Cefuroxime	Private Clinic	1	0	1	0	0	0	0	0	1
1348	0	1990-12-24	27	3	0	2018-11-21	4	0	2018-11-21	2018-11-17	4	2018-11-22	2018-11-24	4	145	145		1	2018-11-23	NCR	Valenzuela	1	5000-10000 PHP	Tertiary	0	0	0		2	0		1	0								0	0	0	0	0	0	1	0	1
1349	0	2014-03-02	4	1	1	2018-11-22	4	0	2018-11-22	2018-11-21	1	2018-11-23	2018-11-25	4	137	137		0		NCR	Quezon	1	<5000 PHP	none	0		1	others	0	0		1	0								0	1	0	1	0	1	0	1	0
1350	0	1993-12-21	24	3	0	2018-11-22	4	0	2018-11-22	2018-11-18	4	2018-11-23	2018-11-29	8	145	145		1	2018-11-26	NCR	Manila	0	5000-10000 PHP	Secondly	0	0	0		0	0		1	0								0	0	0	1	0	0	1	1	0
1351	0	2010-11-17	8	2	1	2018-11-23	4	0	2018-11-23	2018-11-19	4	2018-11-24	2018-11-26	4	145	145		1	2018-11-23	Region 4		2	10000-15000 PHP	Vocational	0		0		0	0		1	0								0	0	1	1	0	0	1	0	0
1352	1	2000-12-01	17	2	0	2018-11-23	4	0	2018-11-23	2018-11-19	4	2018-11-25	2018-11-28	6	145	145		1	2018-11-23	NCR	Valenzuela	1	<5000 PHP	Secondly	0	0	0		0	0		1	0								0	0	1	0	0	0	0	0	0
1353	1	2004-12-27	13	2	1	2018-11-26	4	1	2018-11-27	2018-11-23	3	2018-12-27	2018-12-01	6	137	137		1	2018-11-28	NCR	Navotas	1	5000-10000 PHP	Tertiary	0		0		0	0		1	0								0	0	1	0	0	1	0	1	0
1354	1	2010-10-12	8	2	1	2018-11-26	4	1	2018-11-27	2018-11-19	7	2018-11-27	2018-11-28	3	137	137		1	2018-11-27	NCR	Manila	0	<5000 PHP	Tertiary	0		0		0	0		1	1	4	2018-11-25	1	08:00:00	Cephalosporines	Cefuroxime	Other Hospital	1	0	1	0	0	1	0	0	0
1355	0	2009-08-01	9	2	0	2018-11-28	4	0	2018-11-28	2018-11-19	9	2018-11-29	2018-12-03	6	145	145		1	2018-11-29	NCR	Malabon	1	10000-15000 PHP	Secondly	0	0	0		0	0		1	0								0	0	0	0	0	0	0	0	0
1356	0	2009-10-21	9	2	1	2018-11-28	4	0	2018-11-28	2018-11-26	2	2018-11-29	2018-12-01	4	145	1		1	2018-11-29	Region 3		2	5000-10000 PHP	Secondly	0		0		0	0		1	1	1	2018-11-27	1	17:00:00	Penicillines	Amoxicillin	Public health center	1	1	0	1	0	0	0	0	0
1357	0	1993-11-03	25	3	1	2018-11-29	4	0	2018-11-29	2018-11-22	7	2018-12-02	2018-12-16	18	145	145		1	2018-12-04	NCR	Manila	0	10000-15000 PHP	Tertiary	0		0		2	0		1	1	3	2018-11-28	1	07:00:00	B-lactamase Inhibitors	Co-Amoxiclav	Private Clinic	1	0	1	0	0	0	1	0	0
1358	0	2015-04-28	3	1	0	2018-11-29	4	0	2018-11-29	2018-11-25	4	2018-11-30	2018-12-03	5	137	137		0		NCR	Manila	0	10000-15000 PHP	Secondly	0	0	0		0	0		1	1	2	2018-11-28	1	14:00:00	Penicillines	Co-Amoxiclav	Private Clinic	1	1	0	0	1	1	1	0	0
1359	1	1975-12-10	42	3	0	2018-12-04	4	0	2018-12-04	2018-12-01	3	2018-12-06	2018-12-12	9	145	145		1	2018-12-06	NCR	Manila	0	10000-15000 PHP	Secondly	0	0	0		0	0		1	0								0	0	1	1	0	0	1	1	0
1360	1	1998-12-21	19	3	1	2018-12-04	4	0	2018-12-04	2018-12-01	3	2018-12-05	2018-12-09	6	145	145		1	2018-12-04	NCR	Valenzuela	1	5000-10000 PHP	Tertiary	0		0		0	0		1	0								0	1	1	0	0	0	0	0	0
1361	0	1980-12-19	37	3	1	2018-12-04	4	1	2018-12-05	2018-11-28	6	2018-12-05	2018-12-11	8	0	0		1	2018-12-05	NCR	Manila	0	10000-15000 PHP	Secondly	0		0		2	1	9	1	1	3	2018-12-02	2	07:00:00	B-lactamase Inhibitors	Co-Amoxiclav	SLH	1	0	1	1	0	0	1	1	0
1362	0	2015-07-26	3	1	1	2018-12-05	4	0	2018-12-05	2018-12-03	2	2018-12-06	2018-12-10	6	137	137		1	2018-12-07	NCR	Caloocan	1	10000-15000 PHP	Secondly	0		0		0	0		1	0								0	0	0	0	0	0	1	1	0
1363	0	2014-06-29	4	1	1	2018-12-05	4	0	2018-12-05	2018-12-05	0	2018-12-07	2018-12-13	9	137	1		0		NCR	Manila	0	10000-15000 PHP	Secondly	0		0		0	0		1	0								0	1	0	1	1	1	1	1	0
1364	0	1995-12-13	22	3	1	2018-12-06	4	0	2018-12-06	2018-12-02	4	2018-12-08	2018-12-11	6	143	143		1	2018-12-10	Region 3		2	5000-10000 PHP	Secondly	0		1	others	2	0		1	0								0	0	1	1	0	0	0	0	0
1365	0	1939-11-16	79	3	1	2018-12-06	4	0	2018-12-06	2018-12-03	3	2018-12-07	2018-12-08	3	145	145		0		Region 4		2	5000-10000 PHP	Primary	0		1	others	0	0		1	1								0	1	1	0	0	0	1	1	0
1366	0	1950-04-11	68	3	0	2018-12-07	4	0	2018-12-07	2018-12-03	4	2018-12-09	2018-12-21	15	0	0		1	2018-12-10	Region 3		2	5000-10000 PHP	Secondly	1	0	1	heart disease;others	0	0		0	0								0	1	1	0	1	1	0	1	0
1367	0	2005-08-15	13	2	1	2018-12-06	4	1	2018-12-07	2018-11-30	6	2018-12-07	2018-12-10	5	0	0		0		NCR	Caloocan	1	5000-10000 PHP	Secondly	0		0		0	0		1	1					Penicillines	Amoxicillin		1	0	1	0	0	0	0	0	0
1368	1	2013-08-08	5	2	0	2018-12-10	4	0	2018-12-10	2018-12-07	3	2018-12-11	2018-12-12	3	137	137		1	2018-12-12	NCR	Manila	0	5000-10000 PHP	Secondly	0	0			0	0		1	0								0	0	1	0	0	0	1	0	0
1369	0	1991-12-10	26	3	1	2018-12-09	4	1	2018-12-10	2018-12-07	2	2018-12-12	2018-12-17	9	0			1	2018-12-11	NCR	Quezon	1	5000-10000 PHP	Secondly	0		0		0	0		1	1	1	2018-12-09	0		B-lactamase Inhibitors	Co-Amoxiclav	Other Hospital	1	0	0	0	1	1	1	0	0
1370	1	1999-12-01	19	3	1	2018-12-11	4	0	2018-12-11	2018-12-09	2	2018-12-12	2018-12-15	5	145	145		1	2018-12-13	NCR	Quezon	1	10000-15000 PHP	Secondly	0		0		2	1	3	1	0								0	0	1	0	0	0	1	0	0
1371	0	1992-07-24	26	3	1	2018-12-11	4	0	2018-12-11	2018-12-10	1	2018-12-12	2018-12-18	8	145	145		1	2018-12-13	NCR	Navotas	1	<5000 PHP	Secondly	0		0		2	0		1	0								0	1	0	0	1	0	0	0	0
1372	1	2005-12-25	12	2	1	2018-12-11	4	0	2018-12-11	2018-12-08	3	2018-12-12	2018-12-15	5	145	145		1	2018-12-13	NCR	Manila	0	15000-20000 PHP	Tertiary	0		0		0	0		1	1	4	2018-12-11	0	07:00:00	B-lactamase Inhibitors	Co-Amoxiclav	Other Hospital	1	1	0	0	0	0	0	0	0
1373	0	2017-08-10	1	1	1	2018-12-12	4	0	2018-12-12	2018-12-10	2	2018-12-13	2018-12-28	17	0	0		0		NCR	Caloocan	1	5000-10000 PHP	Secondly	0		0		0	0		1	0								0	1	0	1	1	1	1	1	0
1374	0	2014-07-22	4	1	1	2018-12-12	4	0	2018-12-12	2018-12-11	1	2018-12-13	2018-12-22	11	0	0		0		Region 3		2	10000-15000 PHP	Secondly	0		0		0	0		1	0								0	1	1	0	1	1	0	0	0
1375	0	1983-12-09	35	3	0	2018-12-12	4	0	2018-12-12	2018-12-06	6	2018-12-13	2018-12-18	7	136	1		1	2018-12-14	NCR	Quezon	1	10000-15000 PHP	Tertiary	0	0	1	diabetes;others	0	0		1	0								0	1	1	0	1	1	1	0	0
1376	1	1968-01-01	50	3	1	2018-12-13	4	0	2018-12-13	2018-12-10	3	2018-12-14	2018-12-18	6	145	145		1	2018-12-17	NCR	Manila	0	5000-10000 PHP	Secondly	0		0		2	1	12	1	0								0	1	1	0	0	0	1	0	0
1377	0	2011-05-20	7	2	0	2018-12-13	4	0	2018-12-13	2018-12-07	6	2018-12-14	2018-12-17	5	140	140		1	2018-12-17	NCR	Manila	0	<5000 PHP	Secondly	0	0	0		0	0		1	1					Penicillines	Amoxicillin	Public health center	1	1	0	0	1	1	1	0	0
1378	0	1961-04-04	57	3	0	2018-12-14	4	0	2018-12-14	2018-12-12	2	2018-12-23	2018-12-24	11	145	145		1	2018-12-14	NCR	Manila	0	<5000 PHP	Secondly	0	0	0		0	0		1	1	2	2018-12-13	1	23:00:00	Penicillines	Amoxicillin	Pharmacy	1	1	0	0	0	0	0	0	0
1379	0	1971-06-23	47	3	0	2018-12-16	4	1	2018-12-17	2018-12-09	7	2019-01-30	2019-01-01	17	0	0		0		NCR	Manila	0	15000-20000 PHP	Tertiary	0	0	0		0	0		1	0								0	0	1	0	0	1	0	0	0
1380	1	1997-11-25	21	3	1	2018-12-17	4	1	2018-12-18	2018-12-14	3	2018-12-19	2018-12-21	5	145	145		1	2018-12-20	Region 4		2	10000-15000 PHP	Secondly	0		0		2	0	3	1	0								0	0	0	0	0	0	0	0	0
1381	1	1980-05-05	38	3	1	2018-12-17	4	1	2018-12-18	2018-12-14	3	2018-12-18	2018-12-21	5	145	145		1	2018-12-20	NCR	Quezon	1	10000-15000 PHP	Tertiary	0		0		2	0		1	0								0	0	1	0	0	1	0	0	0
1382	0	2014-10-27	4	1	1	2018-12-18	4	0	2018-12-18	2018-12-13	5	2018-12-20	2018-12-23	6	137	137		0		NCR	Manila	0	5000-10000 PHP	Primary	0				0	0		1	1	4	2018-12-17	1	07:00:00	B-lactamase Inhibitors	Co-Amoxiclav	Others	1	0	0	0	1	1	1	0	0
1383	1	2006-06-12	12	2	0	2018-12-18	4	1	2018-12-19	2018-12-11	7	2018-12-20	2018-12-21	4	0	0		1	2018-12-21	Region 4		2	10000-15000 PHP	Secondly	0	0	0		0	0		1	1	5	2018-12-17	1	07:00:00	Cephalosporines	Cefixime	Other Hospital	1	0	1	0	0	0	1	1	0
1384	0	1976-08-08	42	3	0	2018-12-19	4	0	2018-12-19	2018-12-15	4	2018-12-20	2018-12-24	6	145	145		1	2018-12-21	NCR	Manila	0	5000-10000 PHP	Tertiary	0	0	1	others	2	1	3	1	0								0	0	1	0	0	0	1	0	0
1385	0	1942-12-27	75	3	1	2018-12-20	4	0	2018-12-20	2018-12-06	14	2018-12-20	2018-12-20	1	145	145		0		NCR	Quezon	1	5000-10000 PHP	Primary	0		0		0	0		1	1	3	2018-12-19	1	09:00:00	Macrolides	Azithromycin	Private Clinic	1	0	0	1	0	0	1	1	0
1386	0	2008-11-05	10	2	0	2019-01-03	4	0	2019-01-03	2018-12-31	3	2019-01-04	2019-01-08	6	145	145		1	2019-01-07	NCR	Manila	0	10000-15000 PHP	Secondly	0	0	0		0	0		1	1	3	2019-01-03	0		B-lactamase Inhibitors	Co-Amoxiclav	SLH	1	0	1	0	0	0	0	0	0
1387	0	1961-02-09	57	3	0	2019-01-03	4	0	2019-01-03	2018-12-28	6	2019-01-05	2019-01-07	5	145	145		1	2019-01-07	Region 3		2	5000-10000 PHP	Primary	1	0	1	others	0	0		0	0								0	0	0	0	0	0	1	0	0
1388	0	1969-12-24	49	3	0	2019-01-04	4	0	2019-01-04	2018-12-29	6	2019-01-05	2019-01-07	4	145	145		1	2019-01-07	NCR	Caloocan	1	5000-10000 PHP	Secondly	0	0	0		2	1	1	1	0								0	0	1	0	0	1	1	0	0
1389	0	1976-08-02	42	3	1	2019-01-03	4	1	2019-01-04	2018-12-29	5	2019-01-05	2019-01-08	6	145	145		1	2019-01-04	NCR	Manila	0	5000-10000 PHP	Secondly	1		1	others	1	1		1	0								0	0	1	0	0	1	1	0	0
1390	0	1977-10-30	41	3	1	2019-01-04	4	0	2019-01-04	2019-01-01	3	2019-01-05	2019-01-09	6	145	145		1	2019-01-07	Region 3		2	5000-10000 PHP	Vocational	0		0		1	1	3	1	0								0	0	1	1	0	0	1	0	0
1391	0	2009-11-05	9	2	0	2019-01-07	4	0	2019-01-07	2019-01-01	6	2019-01-08	2019-01-13	7	145	145		1	2019-01-09	Region 4		2	10000-15000 PHP	Secondly	0	0	0		0	0		1	1	2	2019-01-07	0	07:00:00	Unknown		Private Clinic	1	1	0	1	1	1	0	0	0
1392	0	2014-12-08	4	1	0	2019-01-07	4	0	2019-01-07	2019-01-02	5	2019-01-08	2019-01-09	3	137	1		1	2019-01-09	NCR	Manila	0	5000-10000 PHP	Secondly	0	0	0		0	0		1	0								0	0	1	0	0	0	1	0	0
1393	0	1988-10-07	30	3	0	2019-01-08	4	0	2019-01-08	2019-01-08	0	2019-01-09	2019-01-12	5	145	145		1	2019-01-10	NCR	Manila	0	5000-10000 PHP	Secondly	0	0	0		0	0		0	0								0	0	0	0	0	0	0	0	0
1394	1	1999-07-28	19	3	0	2019-01-08	4	0	2019-01-08	2019-01-04	4	2019-01-09	2019-01-14	7	145	145		1	2019-01-10	NCR	Paranaque	1	5000-10000 PHP	Tertiary	0	0	0		0	0		0	0								0	0	0	0	0	0	0	0	0
1395	1	1997-04-02	21	3	1	2019-01-07	4	1	2019-01-08	2019-01-04	3	2019-01-08	2019-01-12	6	145	145		1	2019-01-10	Region 4		2		Secondly	0		0		2	1	1	1	0								0	0	1	0	1	1	1	0	0
1396	0	2016-05-07	2	1	1	2019-01-08	4	0	2019-01-08	2019-01-01	7	2019-01-12	2019-01-13	6	137	137		1	2019-01-10	NCR	Caloocan	1	10000-15000 PHP	Tertiary	0		0		0	0		1	0								0	0	0	0	0	0	1	1	0
1397	1	1987-08-14	31	3	1	2019-01-08	4	0	2019-01-08	2019-01-03	5	2019-01-09	2019-01-11	4	145	145		1	2019-01-10	NCR	Manila	0	5000-10000 PHP	Secondly	0		0		0	0		1	0								0	0	1	0	0	0	0	0	0
1398	0	2014-06-22	4	1	0	2019-01-09	4	0	2019-01-09	2019-01-06	3	2019-01-10	2019-01-13	5	135	135		0		NCR	Manila	0	5000-10000 PHP	Secondly	0	0	0		0	0		1	0								0	0	0	0	1	1	1	0	0
1399	1	1993-01-30	25	3	1	2019-01-08	4	0	2019-01-08	2019-01-03	5	2019-01-09	2019-01-11	4	145	145		1	2019-01-11	NCR	Paranaque	1	10000-15000 PHP	Tertiary	0		0		2	1	1	1	0								0	0	1	0	0	0	1	0	0
1400	0	2015-12-30	3	1	1	2019-01-09	4	0	2019-01-09	2019-01-05	4	2019-01-10	2019-01-16	8	137	0		0		NCR	Manila	0		Secondly	0		0		0	0		1	0								0	0	0	0	1	1	1	0	0
1401	0	2003-08-15	15	2	1	2019-01-10	4	0	2019-01-10	2019-01-05	5	2019-01-13	2019-01-13	4	145	145		0		NCR	Caloocan	1	5000-10000 PHP	Primary	0		0		0	0		1	0								0	0	1	0	0	0	0	0	0
1402	0	1991-12-03	27	3	1	2019-01-11	4	0	2019-01-11	2019-01-04	7	2019-01-12	2019-01-15	5	145	145		1	2019-01-11	NCR	Manila	0	<5000 PHP	none	0		0		1	1	1	1	1	1	2019-01-10	1	12:00:00	Cephalosporines	Cefuroxime	Other Hospital	1	1	1	0	0	0	1	0	0
1403	0	1952-08-20	66	3	1	2019-01-11	4	0	2019-01-11	2019-01-08	3	2019-01-15	2019-01-19	9	145	145		1	2019-01-14	NCR	Manila	0	5000-10000 PHP	Secondly	0		0		0	0		1	0								0	0	1	0	0	0	1	0	0
1404	0	1985-01-24	33	3	0	2019-01-13	4	1	2019-01-14	2019-01-09	4	2019-01-16	2019-01-25	13	0	0		1	2019-01-14	NCR	Valenzuela	1	5000-10000 PHP	Secondly	0	0	0		0	0		1	0								0	0	0	0	1	1	1	1	0
1405	0	1981-07-05	37	3	0	2019-01-14	4	0	2019-01-14	2019-01-08	6	2019-01-15	2019-01-18	5	145	145		1	2019-01-16	NCR	Caloocan	1	5000-10000 PHP	Secondly	0	0	0		0	0		1	1	3	2019-01-14	0	08:00:00	B-lactamase Inhibitors	Co-Amoxiclav	Private Clinic	1	0	0	1	1	1	1	1	0
1406	0	1988-11-15	30	3	0	2019-01-15	4	0	2019-01-15	2019-01-10	5	2019-01-16	2019-01-17	3	145	145		1	2019-01-17	NCR	Manila	0	<5000 PHP	Secondly	0	0	0		2	0		1	0								0	0	1	0	0	0	1	0	0
1407	1	2000-02-07	18	3	1	2019-01-15	4	0	2019-01-15	2019-01-08	7	2019-01-16	2019-01-18	4	145	145		1	2019-01-17	NCR	Caloocan	1	5000-10000 PHP	Secondly	0		0		2	1		1	1	1	2019-01-14	1	07:00:00	Macrolides	Azithromycin	Private Clinic	1	0	0	0	1	1	1	0	0
1408	1	2006-04-26	12	2	1	2019-01-15	4	0	2019-01-15	2019-01-13	2	2019-01-18	2019-01-22	8	138	138		1	2019-01-17	NCR	Manila	0	15000-20000 PHP	Tertiary	0		0		0	0		1	0								0	0	0	0	0	0	0	0	0
1409	0	2015-05-21	3	1	0	2019-01-16	4	0	2019-01-16	2019-01-11	5	2019-01-18	2019-02-07	23	136	1		0		Region 3		2	<5000 PHP	Primary	0	0	0		0	0		1	0								0	0	0	0	0	0	1	1	0
1410	0	2014-07-03	4	1	0	2019-01-16	4	0	2019-01-16	2019-01-12	4	2019-01-17	2019-01-18	3	137	137		0		Region 3		2	5000-10000 PHP	Secondly	0	0	0		0	0		1	0								0	0	1	1	0	0	1	0	0
1411	0	2017-10-31	1	1	0	2019-01-16	4	0	2019-01-16			2019-01-17	2019-01-17	2	0	0		0		NCR	Quezon	1	5000-10000 PHP	Secondly	0	0	0		0	0		1	0								0	1	0	0	1	1	1	1	0
1412	0	1953-01-01	66	3	1	2019-01-16	4	1	2019-01-17	2019-01-13	3	2019-01-18	2019-01-21	6	0	0		1	2019-01-17	NCR	Caloocan	1	<5000 PHP	Secondly	1		1	diabetes;others	0	0		1	0								0	0	0	0	0	0	1	0	0
1413	0	2014-03-14	4	1	0	2019-01-17	4	0	2019-01-17	2019-01-14	3	2019-01-18	2019-01-20	4	137	137		0		NCR	Manila	0	5000-10000 PHP	Secondly	0	0	0		0	0		1	0								0	0	0	0	1	1	1	0	0
1414	0	2014-06-19	4	1	0	2019-01-21	4	0	2019-01-21	2019-01-19	2	2019-01-22	2019-01-23	3	137	137		1	2019-01-23	Region 3		2	5000-10000 PHP	Secondly	0	0	0		0	0		1	1	5	2019-01-20	1	14:00:00	Unknown	Unknown	Other Hospital	1	0	0	0	1	1	1	1	0
1415	0	2014-07-29	4	1	1	2019-01-21	4	0	2019-01-21	2019-01-15	6	2019-01-22	2019-01-23	3	137	137		1	2019-01-23	NCR	Caloocan	1	5000-10000 PHP	Secondly	0		0		0	0		1	0								0	0	0	0	1	1	1	0	0
1416	1	2007-07-13	11	2	0	2019-01-21	4	1	2019-01-22	2019-01-19	2	2019-01-24	2019-01-29	9	145	145		1	2019-01-24	Region 4		2	5000-10000 PHP	Secondly	0	0	0		0	0		1	1	2	2019-01-21	0	19:00:00	B-lactamase Inhibitors	Co-Amoxiclav	Other Hospital	1	1	1	0	0	0	1	0	0
1417	1	2004-11-12	14	2	1	2019-01-21	4	1	2019-01-22	2019-01-19	2	2019-01-22	2019-01-24	4	145	145		1	2019-01-22	NCR	Caloocan	1	5000-10000 PHP	Vocational	0		0		0	0		1	0				19:00:00				0	1	1	0	1	1	0	0	0
1418	0	1995-05-31	23	3	1	2019-01-22	4	1	2019-01-23	2019-01-18	4	2019-01-23	2019-01-26	5	145	145		1	2019-01-25	NCR	Quezon	1	<5000 PHP	Primary	0		0		1	1	15	1	0								0	0	1	0	0	0	0	0	0
1419	0	1999-09-30	19	3	1	2019-01-23	4	0	2019-01-23	2019-01-17	6	2019-01-25	2019-01-28	6	145	145		1	2019-01-25	NCR	Pasay	1	<5000 PHP	Secondly	0		0		0	0		1	0								0	0	1	0	1	1	0	1	0
1420	0	2015-03-24	3	1	0	2019-01-24	4	0	2019-01-24	2019-01-18	6	2019-01-26	2019-01-28	5	137	137		0		NCR	Manila	0	5000-10000 PHP	Secondly	0	0	0		0	0		1	1	3	2019-01-23	1	08:00:00	Macrolides	Clarithromycin	Other Hospital	1	1	0	0	1	1	1	1	0
1421	0	2013-01-12	6	2	0	2019-01-24	4	0	2019-01-24	2019-01-14	10	2019-01-25	2019-01-28	5	137	137		1	2019-01-28	NCR	Manila	0	5000-10000 PHP	Secondly	0	0	0		0	0		1	1	10	2019-01-24	0	07:00:00	Macrolides	Clarithromycin	Other Hospital	1	1	0	0	1	1	1	1	0
1422	0	1997-04-14	21	3	0	2019-01-24	4	1	2019-01-25	2019-01-14	10	2019-01-26	2019-01-29	6	145	145		1	2019-01-28	Region 3		2	5000-10000 PHP	Secondly	0	0	0		0	0		1	0								0	0	1	0	1	1	1	1	0
1423	0	1998-05-12	20	3	0	2019-01-24	4	1	2019-01-25	2019-01-17	7	2019-01-25	2019-01-28	5	137	137		1	2019-01-28	NCR	Caloocan	1	<5000 PHP	Tertiary	0	0	0		0	0		1	0								0	0	1	0	0	0	1	1	0
1424	0	1964-11-04	54	3	0	2019-01-27	4	1	2019-01-28	2019-01-24	3	2019-02-12	2019-02-17	22	0	0		1	2019-01-28	Region 3		2	<5000 PHP	Primary	0	0	0		0	0		1	0								0	1	1	0	1	1	1	1	0
1425	0	2000-07-24	18	3	1	2019-01-28	4	0	2019-01-28	2019-01-24	4	2019-01-30	2019-01-31	4	145	145		1	2019-01-30	NCR	Navotas	1	<5000 PHP	Secondly	0		0		0	0		1	1	1	2019-01-27	1	07:00:00	B-lactamase Inhibitors	Co-Amoxiclav	Other Hospital	1	0	0	0	1	1	1	1	0
1426	0	2017-07-18	1	1	1	2019-01-29	4	0	2019-01-29	2019-01-28	1	2019-01-30	2019-02-01	4	0	0		0		Region 4		2	10000-15000 PHP	Tertiary	0		0		0	0		1	0								0	1	0	0	1	1	0	0	0
1427	1	1992-08-05	26	3	1	2019-01-29	4	0	2019-01-29	2019-01-27	2	2019-01-30	2019-01-30	2	145	145		0		NCR	Malabon	1	5000-10000 PHP	Secondly	0		0		2	0		1	0								0	0	1	0	0	1	0	0	0
1428	0	2006-11-10	12	2	0	2019-01-28	4	1	2019-01-29	2019-01-24	4	2019-01-29	2019-01-30	3	144	145		1	2019-01-31	NCR	Manila	0	5000-10000 PHP	Secondly	0	0	0		0	0		1	0								0	0	1	0	0	0	1	1	0
1429	1	2012-03-18	6	2	1	2019-01-28	4	1	2019-01-29	2019-01-24	4	2019-01-29	2019-02-01	5	137	137		1	2019-01-29	NCR	Manila	0	5000-10000 PHP	Tertiary	0		0		0	0		1	0								0	0	1	0	0	0	1	0	0
1430	0	1996-05-15	22	3	0	2019-01-30	4	0	2019-01-30	2019-01-27	3	2019-01-31	2019-02-02	4	0	0		1	2019-02-01	NCR	Malabon	1	<5000 PHP	Secondly	0	0	0		0	0		1	0								0	0	0	0	1	1	0	0	0
1431	0	1973-03-14	45	3	1	2019-01-29	4	1	2019-01-30	2019-01-27	2	2019-01-31	2019-02-02	5	144	145		1	2019-01-30	NCR	Manila	0	5000-10000 PHP	Primary	0		1	diabetes	2	1	1	1	0								0	0	1	0	0	0	1	1	0
1432	0	2010-12-06	8	2	1	2019-01-29	4	1	2019-01-30	2019-01-27	2	2019-02-20	2019-02-28	31	0	0		0		NCR	Manila	0	5000-10000 PHP	Tertiary	0	0	0	others	0	0		1	1	2	2019-01-28	1	07:00:00	B-lactamase Inhibitors	Co-Amoxiclav	Private Clinic	1	1	0	0	0	0	1	1	0
1433	0	2006-09-01	12	2	0	2019-01-31	4	0	2019-01-31	2019-01-25	6	2019-02-01	2019-02-06	7	141	141		1	2019-02-04	NCR	Quezon	1	<5000 PHP	Secondly	0	0	0		0	0		1	1	3	2019-01-30	1	22:00:00	Cephalosporines	Cefuroxime	Private Clinic	1	1	1	0	1	1	1	0	0
1434	0	2004-12-25	14	2	0	2019-01-31	4	0	2019-01-31	2019-01-27	4	2019-02-01	2019-02-06	7	145	145		1	2019-02-04	NCR	Quezon	1	5000-10000 PHP	Secondly	0	0	0		0	0		1	1	3	2019-01-30	1	22:00:00	Cephalosporines	Cefuroxime	Private Clinic	1	1	1	0	1	1	1	1	0
1435	0	2014-10-16	4	1	1	2019-02-01	4	0	2019-02-01	2019-01-30	2	2019-02-04	2019-02-05	5	137	0		0		NCR	Navotas	1	5000-10000 PHP	Primary	0		0		0	0		1	0								0	1	0	0	1	1	1	0	0
1436	0	2002-07-08	16	2	0	2019-02-01	4	0	2019-02-01	2019-01-29	3	2019-02-04	2019-02-11	11	142	143		1	2019-02-04	NCR	Valenzuela	1	5000-10000 PHP	Secondly	0	0	0		0	0		1	0								0	0	1	0	1	1	1	1	0
1437	0	2013-12-25	5	2	1	2019-02-04	4	0	2019-02-04	2019-02-01	3	2019-02-07	2019-02-10	7	136	136		0		NCR	Manila	0	5000-10000 PHP	Primary	0		0		0	0		1	1	3	2019-02-04	0	01:00:00	B-lactamase Inhibitors	Co-Amoxiclav	Private Clinic	1	1	0	0	1	1	1	0	0
1438	0	2005-05-06	13	2	1	2019-02-04	4	0	2019-02-04	2019-01-22	13	2019-02-05	2019-02-08	5	145	145		1	2019-02-04	NCR	Caloocan	1	5000-10000 PHP	Primary	0		0		0	0		1	0								0	0	1	0	0	0	1	0	0
1439	0	2015-01-30	4	1	0	2019-02-04	4	0	2019-02-04	2019-01-30	5	2019-02-07	2019-02-11	8	136	137		0		NCR	Quezon	1	5000-10000 PHP	Secondly	0	0	0		0	0		1	0								0	1	0	0	1	1	1	1	0
1440	0	1990-05-09	28	3	0	2019-02-05	4	1	2019-02-06	2019-02-01	4	2019-02-06	2019-02-08	4	0	0		1	2019-02-06	NCR	Manila	0	5000-10000 PHP	Secondly	0	1	0		0	0		1	0								0	0	1	1	1	1	0	0	0
1441	0	1972-08-13	46	3	1	2019-02-05	4	1	2019-02-06	2019-01-25	11	2019-02-06	2019-02-06	2	0	0		1	2019-02-06	NCR	Manila	0	5000-10000 PHP	Secondly	0		1	others	2	1	6	1	0								0	0	0	0	1	1	1	0	0
1442	1	2011-12-27	7	2	0	2019-02-06	4	0	2019-02-06	2019-02-03	3	2019-02-07	2019-02-09	4	137	137		1	2019-02-08	NCR	Malabon	1	<5000 PHP	Secondly	0	0	0		0	0		1	0								0	0	1	0	0	0	1	0	0
1443	1	2013-10-23	5	2	1	2019-02-06	4	0	2019-02-06	2019-01-31	6	2019-02-07	2019-02-09	4	137	137		1	2019-02-08	NCR	Caloocan	1	5000-10000 PHP	Tertiary	0					0	0	1	0								0	0	1	0	0	0	1	0	0
1444	0	1995-12-04	23	3	1	2019-02-07	4	0	2019-02-07	2019-02-03	4	2019-02-08	2019-02-10	4	145	145		0		NCR	Caloocan	1	<5000 PHP	Secondly	0		0		2	0		1	0								0	0	1	0	0	1	1	0	0
1445	0	1981-12-14	37	3	1	2019-02-07	4	0	2019-02-07	2019-02-02	5	2019-02-08	2019-02-12	6	145	145		1	2019-02-11	NCR	Manila	0	5000-10000 PHP	Secondly	0		0		0	0		1	0								0	0	0	0	1	1	1	0	0
1446	0	1981-07-07	37	3	1	2019-02-06	4	1	2019-02-07	2019-02-05	1	2019-02-07	2019-02-09	4	145	145		0		NCR	Quezon	1	5000-10000 PHP	Secondly	0		0		2	1	4	1	0								0	0	1	1	0	0	1	0	0
1447	0	1990-08-29	28	3	0	2019-02-08	4	0	2019-02-08	2019-02-03	5	2019-02-09	2019-02-11	4	145	145		1	2019-02-11	NCR	Paranaque	1	5000-10000 PHP	Primary	0	0	0		0	0		1	0								0	0	0	0	1	1	1	1	0
1448	0	1999-12-24	19	3	0	2019-02-08	4	0	2019-02-08	2019-02-02	6	2019-02-09	2019-02-11	4	145	145		1	2019-02-11	NCR	Manila	0	10000-15000 PHP	Vocational	0	0	0		0	0		1	1	2	2019-02-08	0	07:00:00	B-lactamase Inhibitors	Co-Amoxiclav	SLH	1	0	0	0	1	1	1	1	0
1449	0	2011-05-16	7	2	1	2019-02-08	4	0	2019-02-08	2019-01-25	14	2019-02-09	2019-02-11	4	145	145		1	2019-02-11	NCR	Quezon	1	5000-10000 PHP	Secondly	0		0		0	0		1	0								0	0	0	0	0	0	1	0	0
1450	0	2011-12-08	7	2	1	2019-02-11	4	0	2019-02-11	2019-02-06	5	2019-02-13	2019-02-16	6	135	135		1	2019-02-13	NCR	Manila	0	5000-10000 PHP	Secondly	0		0		0	0		1	0								0	0	0	0	1	1	1	0	0
1451	0	2014-07-20	4	1	1	2019-02-11	4	0	2019-02-11	2019-02-06	5	2019-02-12	2019-02-15	5	135	135		1	2019-02-13	NCR	Manila	0	5000-10000 PHP	Secondly			0		0	0		1	1	2	2019-02-11	0	10:00:00	B-lactamase Inhibitors	Co-Amoxiclav	Other Hospital	1	1	0	0	0	1	1	1	0
1452	1	2013-05-30	5	2	1	2019-02-11	4	1	2019-02-12	2019-02-09	2	2019-02-13	2019-02-15	5	140	0		1	2019-02-14	NCR	Caloocan	1	<5000 PHP	Primary	0		0		0	0		1	0								0	0	1	1	0	0	1	0	0
1453	1	2014-01-12	5	2	1	2019-02-12	4	0	2019-02-12	2019-02-10	2	2019-02-13	2019-02-18	7	139	0		1	2019-02-14	NCR	Manila	0	5000-10000 PHP	Secondly	0		1	others	0	0		1	0								0	0	0	0	0	0	0	0	0
1454	0	1981-11-28	37	3	1	2019-02-13	4	0	2019-02-13	2019-02-05	8	2019-02-14	2019-02-16	4	145	146		1	2019-02-15	Region 3		2	5000-10000 PHP	Secondly	0		0		2	0		1	1	1	2019-02-12	1	17:00:00	Penicillines	Amoxicillin	Other Hospital	1	1	1	0	0	1	1	1	0
1455	0	2006-10-26	12	2	1	2019-02-12	4	1	2019-02-13	2019-01-24	19	2019-02-23	2019-02-26	15	145	145		1	2019-02-15	NCR	Manila	0	5000-10000 PHP	Secondly	0		0		0	0		1	1					Unknown	Unknown		0	0	0	0	0	0	1	0	0
1456	0	2009-10-29	9	2	0	2019-02-13	4	1	2019-02-14	2019-02-09	4	2019-02-14	2019-03-03	19	145	144		0		Region 3		2	5000-10000 PHP	Secondly	0	0	0		0	0		1	0								0	0	0	0	0	0	0	0	0
1457	0	1948-01-02	71	3	1	2019-02-13	4	1	2019-02-14	2019-02-09	4	2019-02-14	2019-02-21	9	0	0		1	2019-02-18	Region 4		2	<5000 PHP	Secondly	0		1	others	0	0		1	0								0	0	1	0	0	0	1	1	0
1458	0	1981-06-06	37	3	1	2019-02-14	4	1	2019-02-15	2019-02-07	7	2019-02-17	2019-02-19	6	141	142		1	2019-02-18	NCR	Taguig	1	5000-10000 PHP	Secondly	0		0		0	0		1	0								0	1	1	0	0	1	1	0	0
1459	0	1977-11-09	41	3	1	2019-02-15	4	0	2019-02-15	2019-02-08	7	2019-02-16	2019-02-18	4	145	145		1	2019-02-18	NCR	Caloocan	1	5000-10000 PHP	Secondly	0		0		2	1	5	1	1	1	2019-02-14	1	21:00:00	Cephalosporines	Cefuroxime	Other Hospital	1	0	1	0	0	1	1	1	0
1460	0	2016-08-11	2	1	1	2019-02-15	4	0	2019-02-15	2019-02-14	1	2019-02-17	2019-02-20	6	137	137		0		Region 3		2	5000-10000 PHP	Primary	0		0		0	0		1	1	7	2019-02-14	1	07:00:00	Penicillines	Amoxicillin	Others	1	1	0	0	0	1	1	1	0
1461	0	1995-08-17	23	3	1	2019-02-18	4	0	2019-02-18	2019-02-10	8	2019-02-19	2019-02-21	4	145	145		1	2019-02-20	NCR	Pasay	1	<5000 PHP	Secondly	0		0		2	1	10	1	0								0	1	1	0	0	1	1	1	0
1462	0	1997-12-31	21	3	1	2019-02-17	4	1	2019-02-18	2019-02-10	7	2019-02-21	2019-02-21	5	145	144		1	2019-02-20	NCR	Manila	0	<5000 PHP	Tertiary	0		1	others	0	0		1	0								0	1	1	0	0	1	1	1	0
1463	0	1941-08-20	77	3	0	2019-02-19	4	0	2019-02-19	2019-02-13	6	2019-02-20	2019-02-22	4	141	141		1	2019-02-21	Region 3		2	5000-10000 PHP	Tertiary	1	0	1	heart disease;others	0	0		1	1	5	2019-02-19	0	07:00:00	B-lactamase Inhibitors	Co-Amoxiclav	Other Hospital	1	0	1	0	0	0	1	0	0
1464	1	1994-08-30	24	3	0	2019-02-19	4	1	2019-02-20	2019-02-15	4	2019-02-20	2019-02-21	3	145	145		1	2019-02-20	NCR	Manila	0	10000-15000 PHP	Tertiary	0	0	1	others	2	1	4	1	0								0	1	1	0	0	0	1	0	0
1465	1	2010-05-09	8	2	0	2019-02-19	4	1	2019-02-20	2019-02-15	4	2019-02-21	2019-02-23	5	137	1		1	2019-02-22	Region 4		2	<5000 PHP	Primary	0	0	0		0	0		1	0								0	0	1	0	0	1	0	0	0
1466	0	2017-09-25	1	1	0	2019-02-21	4	0	2019-02-21	2019-02-16	5	2019-02-22	2019-02-25	5	136	1		0		Region 4		2	<5000 PHP	Secondly	0	0	1	lung disease;others	0	0		1	1	2	2019-02-21	0	08:00:00	B-lactamase Inhibitors	Co-Amoxiclav	Public health center	1	0	0	0	0	0	1	1	0
1467	0	1992-01-10	27	3	1	2019-02-21	4	1	2019-02-22	2019-02-17	4	2019-02-22	2019-02-25	5	145	143		0		NCR	Manila	0	<5000 PHP	Secondly	0		1	others	2	1	10	1	0								0	0	0	1	0	1	1	1	0
1468	1	1992-03-30	26	3	1	2019-02-22	4	0	2019-02-22	2019-02-08	14	2019-02-23	2019-02-25	4	145	143		0		NCR	Makati	1	5000-10000 PHP	Primary	0		0		2	0		1	0								0	0	1	1	0	0	0	0	0
1469	1	2007-01-11	12	2	1	2019-02-26	4	0	2019-02-26	2019-02-22	4		2019-03-04	7	144	144		1	2019-02-28	Region 4		2	<5000 PHP	Secondly	0		0		0	0		1	1	3	2019-02-25	1	08:00:00	B-lactamase Inhibitors	Co-Amoxiclav	Public health center	1	1	1	0	0	0	0	0	0
1470	1	1997-02-05	22	3	1	2019-02-25	4	1	2019-02-26	2019-02-23	2	2019-02-26	2019-02-28	4	143	143		1	2019-02-28	NCR	Manila	0	5000-10000 PHP	Tertiary	0		0		0	0		1	0								0	0	1	0	0	0	0	0	0
1471	0	1966-04-09	52	3	1	2019-02-26	4	1	2019-02-27	2019-02-20	6	2019-03-27	2019-03-05	8	145	145		1	2019-03-01	NCR	Caloocan	1	5000-10000 PHP	Primary	0		1	others	2	1	18	1	0								0	1	1	0	0	0	0	0	0
1472	0	1980-09-12	38	3	1	2019-02-27	4	0	2019-02-27	2019-02-17	10	2019-03-04	2019-03-05	7	145	145		1	2019-03-01	NCR	Manila	0	10000-15000 PHP	Secondly	1		1	others	2	0		1	1	7	2019-02-27	0	06:00:00	Tetracyclines	Ciprofloxacin	Private Clinic	1	0	0	0	0	0	0	0	0
1473	0	1995-04-22	23	3	1	2019-02-28	4	0	2019-02-28	2019-02-21	7	2019-03-01	2019-03-04	5	145	145		1	2019-03-04	Region 4		2	5000-10000 PHP	Primary	0		0		0	0		1	0								0	0	1	0	0	1	1	1	0
1474	0	2016-11-09	2	1	1	2019-02-28	4	0	2019-02-28	2019-02-25	3	2019-03-01	2019-03-03	4	136	1		0		NCR	Manila	0	5000-10000 PHP	Secondly	0		0		0	0		1	0								0	0	0	0	0	0	1	1	0
1475	0	1958-05-22	60	3	1	2019-02-28	4	0	2019-02-28	2019-02-19	9	2019-03-02	2019-03-05	6	145	145		1	2019-03-04	NCR	Manila	0	5000-10000 PHP	Primary	0		0		2	0		1	1	4	2019-02-27	1	13:30:00	Penicillines	Amoxicillin	Pharmacy	1	0	0	1	0	1	0	1	0
1476	0	1989-01-16	30	3	0	2019-03-01	4	0	2019-03-01	2019-02-21	8	2019-03-02	2019-03-03	3	0	0		0		NCR	Taguig	1	10000-15000 PHP	Tertiary	0	0	0		2	1	10	1	0								0	0	1	1	1	1	1	1	0
1477	0	1999-03-06	19	3	1	2019-02-28	4	1	2019-03-01	2019-02-24	4	2019-03-02	2019-03-06	7	0	0		1	2019-03-04	Region 4		2	5000-10000 PHP	Primary	0		0		0	0		1	0								0	0	1	0	0	1	1	1	0
1478	0	2003-05-25	15	2	1	2019-03-01	4	0	2019-03-01	2019-02-25	4	2019-03-02	2019-03-06	6	145	145		1	2019-03-04	Region 3		2	5000-10000 PHP	Secondly	0		0		0	0		1	1	1	2019-02-28	1	22:00:00	B-lactamase Inhibitors	Co-Amoxiclav	Other Hospital	1	0	1	0	1	1	0	0	0
1479	0	1988-10-09	30	3	1	2019-03-03	4	1	2019-03-04	2019-02-11	20	2019-03-04	2019-03-05	3	145	145		0		NCR	Caloocan	1	5000-10000 PHP	Primary	0		0		2	1	10	1	0								0	0	1	0	0	1	1	0	1
1480	0	1994-11-02	24	3	1	2019-03-03	4	1	2019-03-04	2019-02-24	7	2019-03-04	2019-03-05	3	145	145		0		NCR	Manila	0	5000-10000 PHP	Primary	0		0		0	0		1	1								0	0	1	0	0	1	1	0	1
1481	1	2004-03-24	14	2	1	2019-03-04	4	1	2019-03-05	2019-03-01	3	2019-03-05	2019-03-07	4	145	145		1	2019-03-05	NCR	Caloocan	1	5000-10000 PHP	Secondly	0		0		0	0		1	0								0	0	1	1	0	0	1	1	0
1482	1	2002-07-13	16	2	1	2019-03-04	4	1	2019-03-05	2019-03-01	3	2019-03-05	2019-03-07	4	145	145		1	2019-03-05	NCR	Quezon	1	10000-15000 PHP	Tertiary	0		0		0	0		1	0								0	0	1	1	0	0	1	0	0
1483	0	1988-07-07	30	3	0	2019-03-05	4	1	2019-03-06	2019-03-02	3	2019-03-08	2019-03-09	5	145	145		1	2019-03-06	Region 4		2	<5000 PHP	Primary	0	0	0		1	1	15	1	0								0	0	1	1	0	1	1	1	1
1484	0	2006-06-22	12	2	0	2019-03-06	4	0	2019-03-06	2019-02-24	10	2019-03-07	2019-03-13	8	145	145		0		NCR	Valenzuela	1	<5000 PHP	none	0	0	1	others	0	0		1	1	5	2019-03-06	0	09:00:00	B-lactamase Inhibitors	Co-Amoxiclav	Private Clinic	1	0	1	0	0	1	1	1	0
1485	0	1967-01-03	52	3	1	2019-03-06	4	0	2019-03-06	2019-02-28	6	2019-03-09	2019-03-10	5	145	145		1	2019-03-08	NCR	Caloocan	1	<5000 PHP	Secondly	1		1	diabetes	0	1	30	1	0								0	0	1	1	0	0	1	1	0
1486	0	1981-08-01	37	3	1	2019-03-06	4	0	2019-03-06	2019-02-14	20	2019-03-07	2019-03-10	5	144	145		1	2019-03-08	NCR	Valenzuela	1	5000-10000 PHP	Secondly	0		0		2	0		1	1								0	0	1	0	0	1	1	1	0
1487	0	2009-05-09	9	2	0	2019-03-07	4	0	2019-03-07	2019-03-03	4	2019-03-08	2019-03-21	15	145	145		1	2019-03-11	NCR	Mandaluyong	1	5000-10000 PHP	Vocational	0	0	0		0	0		1	0								0	0	0	0	1	0	0	0	0
1488	0	2016-09-22	2	1	1	2019-03-08	4	0	2019-03-08	2019-03-04	4	2019-03-11	2019-03-11	4	136	136		0		NCR	Manila	0	<5000 PHP	Primary	0		0		0	0		1	0								0	0	0	1	0	0	1	1	0
1489	0	2016-10-19	2	1	1	2019-03-08	4	0	2019-03-08	2019-03-05	3	2019-03-10	2019-03-13	6	156	136		0		NCR	Quezon	1	15000-20000 PHP	Tertiary	0		0		0	0		1	0								0	1	0	1	1	1	1	0	0
1490	0	1978-07-05	40	3	0	2019-03-11	4	0	2019-03-11	2019-03-08	3	2019-03-12	2019-03-14	4	145	145		1	2019-03-13	NCR	Manila	0	5000-10000 PHP	Secondly	0	0	0		0	0		1	0								0	0	1	1	0	0	1	1	0
1491	0	1996-11-16	22	3	0	2019-03-12	4	0	2019-03-12	2019-03-05	7	2019-03-13	2019-03-16	5	145	145		1	2019-03-14	NCR	Taguig	1	5000-10000 PHP	Secondly	0	0	0		0	0		1	0								0	0	1	0	0	1	1	1	0
1492	0	2007-11-12	11	2	0	2019-03-12	4	0	2019-03-12	2019-03-07	5	2019-03-14	2019-03-16	5	145	145		1	2019-03-14	NCR	Manila	0	5000-10000 PHP	Secondly	0	0	1	others	0	0		1	0								0	0	1	0	0	0	1	1	0
1493	1	2006-12-25	12	2	1	2019-03-12	4	0	2019-03-12	2019-03-07	5	2019-03-13	2019-03-16	5	145	145		1	2019-03-14	Region 4		2	5000-10000 PHP	Secondly	0		0		0	0		1	0								0	1	0	0	0	1	1	0	0
1494	0	1983-01-06	36	3	1	2019-03-14	4	0	2019-03-14	2019-03-11	3	2019-03-15	2019-03-17	4	145	145		0		NCR	Quezon	1	5000-10000 PHP	Secondly	0		0		2	0		1	0								0	1	1	0	1	0	1	1	0
1495	0	1999-08-08	19	3	1	2019-03-13	4	1	2019-03-14	2019-03-08	5	2019-03-15	2019-03-18	6	145	144		1	2019-03-18	NCR	Manila	0	5000-10000 PHP	Tertiary	0		0		2	0		1	0								0	0	1	0	0	1	0	0	0
1496	0	1995-07-14	23	3	1	2019-03-13	4	1	2019-03-14	2019-03-05	8	2019-03-14	2019-03-18	6	0	0		1	2019-03-18	NCR	Caloocan	1	5000-10000 PHP	Primary	0		0		1	1	6	1	1	1				B-lactamase Inhibitors	Co-Amoxiclav	Other Hospital	1	0	0	0	0	1	1	1	0
1497	1	1998-05-08	20	3	0	2019-03-14	4	0	2019-03-14	2019-03-10	4	2019-03-16	2019-03-18	5	144	144		1	2019-03-18	NCR	Quezon	1	5000-10000 PHP	Tertiary	0	0	0		0	0		1	0								0	1	1	0	0	1	0	0	0
1498	0	2017-10-03	1	1	0	2019-03-15	4	0	2019-03-15	2019-03-09	6	2019-03-16	2019-03-18	4	136	136		0		NCR	Valenzuela	1	<5000 PHP	Secondly	0	0	0		0	0		1	0								0	0	0	0	0	0	1	1	0
1499	0	2004-03-08	15	2	1	2019-03-15	4	0	2019-03-15	2019-03-09	6	2019-03-21	2019-03-21	7	145	145		1	2019-03-18	NCR	Valenzuela	1	10000-15000 PHP	Secondly	0		0		0	0		1	0								0	1	1	0	0	0	1	1	0
1500	0	1994-07-29	24	3	1	2019-03-18	4	0	2019-03-18	2019-03-16	2	2019-03-19	2019-03-20	3	141	141		1	2019-03-20	NCR	Manila	0	10000-15000 PHP	Secondly	0		0		1	1	1	1	0								0	0	1	0	0	0	0	0	0
1501	1	1994-12-20	24	3	0	2019-03-18	4	1	2019-03-19	2019-03-11	7	2019-03-20	2019-03-22	5	145	145		1	2019-03-21	NCR	Pasay	1	15000-20000 PHP	Tertiary	0	0	0		0	0		1	0								0	0	1	0	0	1	0	0	0
1502	0	2014-11-17	4	1	0	2019-03-18	4	1	2019-03-19	2019-03-16	2	2019-03-22	2019-03-26	9	0	0		0		NCR	Manila	0	10000-15000 PHP	Secondly	0	0	1	others	0	0		0	0								0	1	0	0	0	1	1	0	0
1503	0	1993-06-17	25	3	1	2019-03-19	4	0	2019-03-19	2019-03-14	5	2019-03-20	2019-03-23	5	145	145		1	2019-03-19	NCR	Manila	0	5000-10000 PHP	Primary	0		0		0	0		1	0								0	0	1	0	0	1	0	0	0
1504	0	1991-04-20	27	3	1	2019-03-19	4	1	2019-03-20	2019-03-14	5	2019-03-20	2019-03-24	6	143	145		1	2019-03-22	NCR	Paranaque	1	10000-15000 PHP	Secondly	0		0		2	0		1	0								0	0	0	0	0	1	1	0	0
1505	0	2003-03-08	16	2	0	2019-03-19	4	1	2019-03-20	2019-03-15	4	2019-03-24	2019-04-03	16	0	0		1	2019-03-22	Region 3		2	15000-20000 PHP	Tertiary	0	0	0		0	0		1	0								0	1	0	0	0	0	1	1	0
1506	0	2011-11-18	7	2	0	2019-03-21	4	0	2019-03-21	2019-03-14	7	2019-04-08	2019-04-12	23	137.5	0		0		NCR	Quezon	1	5000-10000 PHP	Tertiary	0	0	0		0	0		1	0								0	1	1	1	0	1	1	1	0
1507	0	1983-11-01	35	3	1	2019-03-22	4	0	2019-03-22	2019-03-17	5	2019-03-30	2019-04-03	13	145	145		1	2019-03-25	NCR	Manila	0	5000-10000 PHP	Secondly	0		0		0	0		1	0								0	0	1	1	0	0	0	0	0
1508	0	1980-05-08	38	3	1	2019-03-22	4	0	2019-03-22	2019-03-17	5	2019-03-24	2019-03-27	6	145	145		1	2019-03-25	NCR	Paranaque	1	<5000 PHP	Secondly	1		1	diabetes;others	1	1	3	1	0								0	0	1	1	1	0	0	1	0
1509	1	2000-08-30	18	3	0	2019-03-22	4	0	2019-03-22	2019-03-18	4	2019-03-23	2019-03-27	6	145	145		1	2019-03-25	Region 4		2	5000-10000 PHP	Tertiary	0	0	0		0	0		1	0								0	0	1	0	0	0	1	0	0
1510	0	1981-06-21	37	3	0	2019-03-25	4	0	2019-03-25	2019-03-22	3	2019-03-29	2019-04-01	8	145	145		1	2019-03-27	NCR	Valenzuela	1	5000-10000 PHP	Primary	0	1	0		0	0		0	0								0	1	1	1	1	1	1	0	0
1511	1	2004-12-31	14	2	0	2019-03-25	4	1	2019-03-26	2019-03-23	2	2019-03-26	2019-03-28	4	141	142		0		NCR	Caloocan	1	10000-15000 PHP	Secondly	0	0	0		0	0		1	0								0	0	1	0	0	0	0	0	0
1512	1	2008-09-16	10	2	0	2019-03-25	4	1	2019-03-26	2019-03-22	3	2019-03-26	2019-03-30	6	142	142		0		Region 3		2	5000-10000 PHP	Secondly	0	0	0		0	0		1	0								0	1	1	0	0	1	0	0	0
1513	0	1996-12-06	22	3	1	2019-03-26	4	1	2019-03-27	2019-03-22	4	2019-03-27	2019-03-29	4	144	145		1	2019-03-29	Region 4		2	<5000 PHP	Primary	0		0		0	1	4	1	0								0	1	0	0	0	0	0	0	0
1514	0	2008-01-25	11	2	0	2019-03-26	4	1	2019-03-27	2019-03-18	8	2019-03-28	2019-04-02	8	0	0		1	2019-03-29	NCR	Manila	0	5000-10000 PHP	Secondly	0	0	0		0	0		1	0								0	0	0	1	0	0	1	0	0
1515	0	2009-05-26	9	2	0	2019-03-28	4	0	2019-03-28	2019-03-26	2	2019-03-29	2019-04-02	6	142.5	142.5		1	2019-04-01	NCR	Caloocan	1	5000-10000 PHP	Secondly	0	0	0		0	0		1	0								0	0	0	0	0	1	1	0	0
1516	0	2011-12-28	7	2	1	2019-03-28	4	0	2019-03-28	2019-03-27	1	2019-03-31	2019-04-07	11	142	144		0		NCR	Quezon	1	5000-10000 PHP	Primary	0		0		0	0		1	1	1	2019-03-27	1	20:00:00	Unknown	Unknown	Other Hospital	1	1	1	0	0	1	0	1	0
1517	0	1998-01-06	21	3	1	2019-03-28	4	1	2019-03-29	2019-03-24	4	2019-03-29	2019-03-30	3	142	143		0		NCR	Paranaque	1	5000-10000 PHP	Secondly	0		0		2	1	15	1	0								0	0	1	0	0	1	1	1	0
1518	0	2003-08-22	15	2	1	2019-03-28	4	1	2019-03-29	2019-03-26	2	2019-03-31	2019-04-02	6	145	145		1	2019-04-01	NCR	Valenzuela	1	5000-10000 PHP	Secondly	0		1	others	0	0		1	0	1	2019-03-27	1	21:00:00	B-lactamase Inhibitors	Co-Amoxiclav	Public health center	1	0	1	0	0	0	0	0	0
1519	0	1972-09-18	46	3	1	2019-04-02	4	0	2019-04-02	2019-03-29	4	2019-04-04	2019-04-07	6	145	145		1	2019-04-02	NCR	Manila	0	<5000 PHP	Secondly	0		1	others	0	0		1	1	1	2019-04-02	0	06:00:00	B-lactamase Inhibitors	Co-Amoxiclav	SLH	1	0	1	1	0	0	1	1	0
1520	1	2007-01-03	12	2	0	2019-04-02	4	0	2019-04-02	2019-03-28	5	2019-04-03	2019-04-18	17	141	1		1	2019-04-04	Region 4		2	5000-10000 PHP	Tertiary	0	0	1	others	0	0		1	0								0	0	1	1	0	0	1	0	1
1521	0	1985-11-17	33	3	0	2019-04-03	4	0	2019-04-03	2019-03-31	3	2019-04-04	2019-04-16	14	145	145		1	2019-04-05	NCR	Manila	0	<5000 PHP	Tertiary	0	0	0		0	0		1	1	1	2019-04-02	1	15:00:00	Penicillines	Amoxicillin	Public health center	1	1	0	1	0	0	0	0	0
1522	1	1972-05-25	46	3	1	2019-04-03	4	0	2019-04-03	2019-03-26	8	2019-04-04	2019-04-05	3	145	145		1	2019-04-05	NCR	Pasay	1	5000-10000 PHP	Tertiary	0		0		2	0		1	1	4	2019-04-03	0	17:00:00	Cephalosporines	Cefuroxime	Private Clinic	1	0	1	1	0	0	1	1	0
1523	0	1995-12-01	23	3	1	2019-04-03	4	0	2019-04-03	2019-03-31	3	2019-04-04	2019-04-05	3	143	144		1	2019-04-05	NCR	Quezon	1	<5000 PHP	Primary	0		0		2	0		1	1	1	2019-04-02	1	21:00:00	Tetracyclines	Doxycycline	Private Clinic	1	0	1	1	0	0	0	0	0
1524	0	1995-02-02	24	3	0	2019-04-03	4	1	2019-04-04	2019-03-29	5	2019-04-06	2019-04-07	5	145	145		0		NCR	Quezon	1	10000-15000 PHP	Tertiary	0	0	0		0	0		1	1	1	2019-04-02	1	16:00:00	Unknown	Unknown	Pharmacy	1	0	1	1	0	1	1	1	0
1525	0	1995-05-22	23	3	0	2019-04-04	4	0	2019-04-04	2019-03-31	4	2019-04-06	2019-04-08	5	145	145		1	2019-04-08	NCR	Manila	0	<5000 PHP	Primary	0	0	0		0	0		1	0								0	0	1	1	0	1	1	1	0
1526	0	1965-01-03	54	3	0	2019-04-04	4	1	2019-04-05	2019-04-01	3	2019-04-11	2019-04-13	10	141	141		1	2019-04-05	Region 4		2	5000-10000 PHP	Primary	1	0	1	others	0	0		1	0								0	1	1	0	0	0	1	1	0
1527	0	1996-12-06	22	3	1	2019-04-05	4	0	2019-04-05	2019-03-31	5	2019-04-09	2019-04-11	7	145	145		1	2019-04-08	Region 4		2	10000-15000 PHP	Secondly	0		0		2	1	4	1	0								0	0	1	0	0	1	1	1	0
1528	0	1969-03-23	50	3	1	2019-04-07	4	1	2019-04-08	2019-03-24	14	2019-04-09	2019-04-09	3	0	0		1	2019-04-09	NCR	Paranaque	1	<5000 PHP	Secondly	0		0		2	0		1	1					Unknown	Co-trimoxazole	Pharmacy	1	1	1	0	0	1	1	1	0
1529	0	1998-10-10	20	3	1	2019-04-07	4	1	2019-04-08	2019-04-01	6	2019-04-08	2019-04-14	8	0	0		0		NCR	Manila	0	<5000 PHP	Primary	0		0		0	0		1	0								0	0	1	0	0	1	0	0	0
1530	0	1987-03-11	32	3	1	2019-04-09	4	1	2019-04-10	2019-04-03	6	2019-04-29	2019-05-08	30	0	0		1	2019-04-12	Region 4		2	<5000 PHP	Secondly	0		0		2	1	15	1	0	5	2019-04-08	1	08:00:00	Unknown	Unknown	Private Clinic	1	1	1	1	0	0	1	1	0
1531	0	1999-10-22	19	3	1	2019-04-10	4	0	2019-04-10	2019-04-02	8	2019-04-13	2019-04-17	8	141	141		1	2019-04-12	Region 4		2	<5000 PHP	Tertiary	0		0		0	0		1	1	5	2019-04-07	3	19:00:00	B-lactamase Inhibitors	Co-Amoxiclav	Private Clinic	1	1	0	0	0	0	1	0	1
1532	1	1994-07-06	24	3	0	2019-04-10	4	1	2019-04-11	2019-04-02	8	2019-04-11	2019-04-14	5	141	142		0		NCR	Manila	0	<5000 PHP	Secondly	0	0	0		2	1	1	1	0								0	0	1	0	0	1	0	0	0
1533	1	1997-11-03	21	3	1	2019-04-11	4	0	2019-04-11	2019-04-06	5	2019-04-12	2019-04-12	2	145	145		0		Region 4		2	<5000 PHP	Secondly	0		0		0	0		1	0								0	1	1	1	0	0	0	0	0
1534	0	2017-10-18	1	1	1	2019-04-12	4	0	2019-04-12	2019-04-06	6	2019-04-13	2019-04-15	4	141	141		0		NCR	Taguig	1	10000-15000 PHP	Secondly	0		0		0	0		1	1	4	2019-04-11	1	22:00:00	Cephalosporines	Cephalexin	Private Clinic	1	1	0	0	0	1	1	1	0
1535	0	2009-03-29	10	2	1	2019-04-12	4	0	2019-04-12	2019-03-28	15	2019-04-29	2019-05-08	27	145	145		1	2019-04-15	NCR	Navotas	1	<5000 PHP	Secondly	0		0		0	0		1	1	4	2019-04-08	4	10:00:00	Macrolides	Clarithromycin	Private Clinic	1	1	1	0	0	1	1	0	0
1536	0	2000-02-15	19	3	0	2019-04-14	4	1	2019-04-15	2019-04-12	2	2019-04-23	2019-04-24	11	0	0		1	2019-04-15	Region 4		2	<5000 PHP	Primary	0	1	0		2	1	3	1	1	1	2019-04-13	1	16:00:00	Cephalosporines	Ceftriaxone	Other Hospital	1	1	1	0	0	1	0	1	0
1537	0	2006-02-13	13	2	0	2019-04-15	4	0	2019-04-15	2019-04-01	14	2019-04-16	2019-04-27	13	143	144		1	2019-04-16	Region 4		2	<5000 PHP	Secondly	0	0	1	others	0	0		1	1	7	2019-04-08	7		Penicillines	Amoxicillin	Private Clinic	1	0	1	1	0	0	1	1	0
1538	0	2010-12-22	8	2	0	2019-04-16	4	0	2019-04-16	2019-04-12	4	2019-04-26	2019-05-07	22	0	0		1	2019-04-22	Region 4		2	<5000 PHP	Secondly	0	0	0		0	0		1	1	1	2019-04-15	1	22:00:00	B-lactamase Inhibitors	Co-Amoxiclav	Private Clinic	1	0	1	0	0	0	1	1	0
1539	0	1992-04-30	26	3	1	2019-04-22	4	0	2019-04-22	2019-04-19	3	2019-04-28	2019-04-30	9	145	145		1	2019-04-24	Region 3		2	10000-15000 PHP	Tertiary	0		0		2	0		1	0								0	0	1	1	0	0	1	1	0
1540	0	1975-11-25	43	3	0	2019-04-23	4	1	2019-04-24	2019-04-18	5	2019-04-24	2019-04-26	4	0	0		1	2019-04-26	NCR	Manila	0	<5000 PHP	Secondly	0	0	0		0	0		1	0								0	0	1	1	0	1	0	0	0
1541	0	2011-09-19	7	2	1	2019-04-23	4	1	2019-04-24	2019-04-19	4	2019-04-26	2019-05-07	15	0	0		1	2019-04-26	Region 4		2	10000-15000 PHP	Secondly	0		1	others	0	0		1	0								0	1	1	0	0	0	1	0	0
1542	1	1990-06-16	28	3	0	2019-04-24	4	1	2019-04-25	2019-04-20	4	2019-04-26	2019-05-01	8	143	142		1	2019-04-26	NCR	Caloocan	1	15000-20000 PHP	Tertiary	0	0	0		0	0		1	0	1	2019-04-24	0	21:00:00	Cephalosporines	Cefuroxime	Private Clinic	1	1	1	0	0	1	0	0	1
1543	0	1991-07-29	27	3	1	2019-04-25	4	0	2019-04-25	2019-04-21	4	2019-04-26	2019-04-27	3	145	145		1	2019-04-26	NCR	Caloocan	1	15000-20000 PHP	Vocational	0		1	others	0	0		1	0								0	1	0	0	0	0	0	1	0
1544	1	1999-10-07	19	3	0	2019-04-26	4	0	2019-04-26	2019-04-22	4	2019-04-28	2019-04-29	4	145	145		1	2019-04-29	NCR	Manila	0	<5000 PHP	Secondly	0	0	0		2	1	3	1	0								0	0	1	1	0	1	0	1	0
1545	0	2007-03-03	12	2	1	2019-04-26	4	0	2019-04-26	2019-04-13	13	2019-05-05	2019-06-04	40	141	1		1	2019-04-30	NCR	Quezon	1	<5000 PHP	Secondly	0		0		0	0		1	1	7	2019-04-26	0	09:00:00	Cephalosporines	Cefaclor	Private Clinic	1	0	1	0	0	0	1	1	0
1546	0	1977-08-23	41	3	0	2019-04-29	4	0	2019-04-29	2019-04-18	11	2019-05-03	2019-05-05	7	0	0		0		NCR	Quezon	1	<5000 PHP	Secondly	0	0	0		0	0		1	0								0	1	0	1	0	1	0	1	0
1547	1	2003-09-10	15	2	1	2019-04-29	4	1	2019-04-30	2019-04-23	6	2019-04-30	2019-05-02	4	144	143		1	2019-05-02	Region 4		2	5000-10000 PHP	Tertiary	0		0		0	0		1	1	6	2019-04-28	1	21:00:00	B-lactamase Inhibitors	Co-Amoxiclav	Private Clinic	1	0	1	1	0	1	0	0	0
1548	0	2006-04-02	13	2	0	2019-04-29	4	1	2019-04-30	2019-04-28	1	2019-05-05	2019-05-06	8	145	145		1	2019-05-02	NCR	Valenzuela	1	<5000 PHP	Secondly	0	0	0		0	0		1	0								0	0	1	1	0	0	1	0	0
1549	0	1976-10-09	42	3	0	2019-05-02	4	0	2019-05-02	2019-04-26	6	2019-05-03	2019-05-06	5	145	145		1	2019-05-06	Region 3		2	10000-15000 PHP	Secondly	0	0	0		0	0		1	0								0	0	1	1	0	0	1	1	0
1550	0	1992-03-21	27	3	1	2019-05-03	4	0	2019-05-03	2019-04-25	8	2019-05-06	2019-05-10	8	145	145		0		NCR	Manila	0	5000-10000 PHP	Secondly	0		1	others	2	1	1	1	0								0	0	1	1	0	0	0	0	0
1551	1	2010-08-01	8	2	1	2019-05-03	4	0	2019-05-03	2019-04-30	3	2019-05-05	2019-05-08	6	141	1		1	2019-05-06	NCR	Quezon	1	15000-20000 PHP	Vocational	0		1	others	0	0		1	0								0	1	1	0	0	0	1	0	0
1552	0	1997-11-14	21	3	1	2019-05-06	4	0	2019-05-06	2019-04-26	10	2019-05-07	2019-05-09	4	144	144		1	2019-05-08	NCR	Manila	0	15000-20000 PHP	Tertiary	0		0		2	0		1	1	7	2019-05-03	3	15:00:00	Cephalosporines	Cefixime	Other Hospital	1	0	1	1	0	0	1	0	0
1553	0	2004-06-05	14	2	1	2019-05-06	4	0	2019-05-06	2019-05-04	2	2019-05-17	2019-05-17	12	145	145		1	2019-05-08	NCR	Manila	0	10000-15000 PHP	Tertiary	0		1	others	0	0		1	1	1	2019-05-06	0	14:00:00	Penicillines	Penicillin G	Other Hospital	1	1	0	0	0	0	0	0	1
1554	1	1976-02-25	43	3	0	2019-05-06	4	1	2019-05-07	2019-05-01	5	2019-05-07	2019-05-11	6	144	143		0		Region 4		2	15000-20000 PHP	Tertiary	0	0	0		0	0		1	1	3	2019-05-04	2	09:00:00	Unknown	Unknown	Private Clinic	1	1	1	0	0	1	1	0	0
1555	1	1993-12-15	25	3	1	2019-05-07	4	1	2019-05-08	2019-05-03	4	2019-05-09	2019-05-11	5	144	143		1	2019-05-10	NCR	Pasay	1	<5000 PHP	Primary	0		0		2	1	15	1	0								0	1	1	1	0	1	1	1	0
1556	0	1977-11-17	41	3	0	2019-05-09	4	0	2019-05-09	2019-05-05	4	2019-05-10	2019-05-12	4	145	145		0		NCR	Caloocan	1	10000-15000 PHP	Secondly	0	0	0		0	0		1	1	2	2019-05-07	2	19:00:00	Cephalosporines	Cefuroxime	Others	1	0	0	1	0	1	1	0	0
1557	0	1993-04-17	26	3	1	2019-05-09	4	0	2019-05-09	2019-05-02	7	2019-05-10	2019-05-11	3	145	145		0		NCR	Caloocan	1	15000-20000 PHP	Tertiary	0		1	others	2	0		1	0								0	0	1	1	0	0	1	1	0
1558	0	2008-12-26	10	2	0	2019-05-10	4	0	2019-05-10	2019-05-07	3	2019-05-11	2019-05-17	8	0	0		0		Region 4		2	5000-10000 PHP	Secondly	0	0	0		0	0		1	1	1	2019-05-09	1	22:00:00	Unknown	Unknown	Other Hospital	1	1	0	0	0	1	0	0	0
1559	0	1991-02-24	28	3	0	2019-05-09	4	1	2019-05-10	2019-05-03	6	2019-05-10	2019-05-13	5	0	0		0		NCR	Manila	0	<5000 PHP	Secondly	0	0	0		2	1	30	1	0								0	1	1	1	0	0	0	0	0
1560	1	1990-01-24	29	3	1	2019-05-14	4	0	2019-05-14	2019-05-07	7	2019-05-15	2019-05-17	4	145	145		1	2019-05-16	Region 4		2	<5000 PHP	Primary	0		0		2	1	4	1	0								0	1	1	1	0	1	0	0	0
1561	1	2000-04-16	19	3	0	2019-05-15	4	0	2019-05-15	2019-05-09	6	2019-05-17	2019-05-19	5	143	143		1	2019-05-17	NCR	Manila	0	5000-10000 PHP	Secondly	0	0	0		2	0		1	0								0	0	1	1	0	1	0	0	0
1562	0	1961-09-08	57	3	1	2019-05-17	4	0	2019-05-17	2019-05-11	6	2019-05-18	2019-05-24	8	145	145		1	2019-05-20	NCR	Quezon	1	5000-10000 PHP	Secondly	0		0		2	0		1	0								0	1	1	1	0	0	0	0	0
1563	0	2015-09-18	3	1	0	2019-05-17	4	0	2019-05-17	2019-05-14	3	2019-05-26	2019-05-30	14	0	0		1	2019-05-20	Region 3		2	5000-10000 PHP	Secondly	0	0	1	others	0	0		1	1	1	2019-05-15	2	07:00:00	Cephalosporines	Cephalexin	Private Clinic	1	1	0	0	0	0	1	1	0
1564	1	2001-05-25	17	2	1	2019-05-20	4	1	2019-05-21	2019-05-16	4	2019-05-22	2019-05-25	6	145	145		1	2019-05-22	NCR	Manila	0	5000-10000 PHP	Secondly	0		1	others	0	0		1	0								0	0	1	1	0	0	0	0	0
1565	1	1999-10-15	19	3	0	2019-05-22	4	0	2019-05-22	2019-05-18	4	2019-05-24	2019-05-28	7	144	144		0		Region 3		2	15000-20000 PHP	Tertiary	0	0	0		0	0		1	1	5	2019-05-21	1	19:00:00	B-lactamase Inhibitors	Co-Amoxiclav	Others	1	0	1	1	0	1	0	0	0
1566	0	1980-06-11	38	3	1	2019-05-23	4	0	2019-05-23	2019-05-09	14	2019-05-27	2019-05-30	8	143	142		1	2019-05-27	NCR	Manila	0	5000-10000 PHP	Secondly	0		0		1	1	18	1	1	1	2019-05-22	1	20:00:00	Unknown	Unknown	Private Clinic	1	0	1	1	0	0	1	1	0
1567	0	1988-11-05	30	3	1	2019-05-24	4	0	2019-05-24	2019-05-17	7	2019-05-31	2019-06-04	12	145	145		1	2019-05-24	NCR	Manila	0	10000-15000 PHP	Secondly	0		0		0	1	1	1	0								0	0	1	1	0	1	0	0	0
1568	0	2008-10-06	10	2	1	2019-05-27	4	0	2019-05-27	2019-05-21	6	2019-05-28	2019-05-30	4	143	143		1	2019-05-29	NCR	Manila	0	<5000 PHP	Secondly	1		1	others	0	0		1	1	2	2019-05-27	0	07:00:00	B-lactamase Inhibitors	Co-Amoxiclav	Others	1	0	0	0	0	0	1	1	0
1569	0	2008-04-11	11	2	1	2019-05-27	4	0	2019-05-27	2019-05-23	4	2019-06-02	2019-06-06	11	145	145		1	2019-05-27	Region 3		2	<5000 PHP	Primary	0		0		0	0		1	0								0	1	1	0	1	1	0	0	0
1570	1	2013-07-01	5	2	1	2019-05-27	4	1	2019-05-28	2019-05-23	4	2019-05-29	2019-05-31	5	146	146		1	2019-05-30	NCR	Manila	0	10000-15000 PHP	Tertiary	0		1	others	0	0		1	0								0	0	1	0	0	0	1	0	0
1571	0	2001-11-04	17	2	1	2019-05-28	4	0	2019-05-28	2019-05-21	7	2019-05-30	2019-06-06	10	144	144		1	2019-05-30	Region 4		2	<5000 PHP	Secondly	0		0		2	1	1	1	0								0	1	1	0	0	0	1	1	0
1572	1	2005-03-16	14	2	1	2019-05-28	4	0	2019-05-28	2019-05-24	4	2019-05-30	2019-06-04	8	141	141		0		NCR	Paranaque	1	>20000 PHP	Tertiary	0		0		2	0		1	1	4	2019-05-28	0	07:00:00	Cephalosporines	Cefuroxime	Private Clinic	1	1	1	0	0	1	1	0	0
1573	0	1999-01-24	20	3	0	2019-05-28	4	1	2019-05-29	2019-05-16	12	2019-05-29	2019-05-30	3	145	144		1	2019-05-30	Region 3		2	10000-15000 PHP	Secondly	0	0	0		0	0		1	1	7	2019-05-28	0	08:00:00	Cephalosporines	Cefixime	Private Clinic		0	0	1	0	0	1	1	0
1574	0	1953-08-01	65	3	1	2019-05-30	4	0	2019-05-30	2019-05-14	16	2019-06-04	2019-06-06	8	142	145		1	2019-06-03	NCR	Quezon	1	10000-15000 PHP	Vocational	1		1	diabetes;others	2	1	8	1	0								0	1	1	0	0	0	1	1	0
1575	0	1973-03-22	46	3	1	2019-05-31	4	0	2019-05-31	2019-05-24	7	2019-06-08	2019-06-08	9	145	145		1	2019-05-31	NCR	Manila	0	<5000 PHP	Secondly	1		1	diabetes	2	1	4	1	0								0	0	1	1	0	0	1	0	0
1576	0	2017-10-02	1	1	1	2019-05-31	4	0	2019-05-31	2019-05-27	4	2019-06-01	2019-06-01	2	145	0		0		Region 4		2	5000-10000 PHP	Secondly	0		1	others	0	0		1	1	1	2019-05-30	1	20:00:00	B-lactamase Inhibitors	Co-Amoxiclav	Private Clinic	1	0	0	0	0	0	1	1	0
1577	0	2017-07-23	1	1	1	2019-05-31	4	0	2019-05-31	2019-05-29	2	2019-06-01	2019-06-03	4	145	0		1	2019-06-03	NCR	Manila	0	10000-15000 PHP	Secondly	0		1	others	0	0		1	0								0	0	0	0	0	0	1	1	0
1578	0	1961-11-25	57	3	1	2019-06-03	4	0	2019-06-03	2019-05-13	21	2019-06-13	2019-06-13	11	145	145		1	2019-06-06	NCR	Manila	0	<5000 PHP	Primary	0		0		1	1	2	0	0								0	1	0	0	0	1	0	0	0
1579	0	1992-01-03	27	3	0	2019-06-03	4	0	2019-06-03	2019-05-31	3	2019-06-05	2019-06-09	7	145	0		0		NCR	Quezon	1	<5000 PHP	Vocational	0	0	0		2	0		1	1	7	2019-05-30	4	20:00:00		Co-Amoxiclav	Other Hospital	1	0	1	0	0	0	0	1	0
1580	0	1956-04-02	63	3	0	2019-06-04	4	0	2019-06-04	2019-05-27	8	2019-06-14	2019-06-18	15	143	144		1	2019-06-06	Region 3		2	15000-20000 PHP	Vocational	1	0	1	others	0	0		1	1	1	2019-06-03	1	20:00:00		Co-Amoxiclav	Pharmacy	1	0	0	0	0	0	1	1	0
1581	1	2009-01-19	10	2	0	2019-06-03	4	1	2019-06-04	2019-05-31	3	2019-06-05	2019-06-09	7	143	144		1	2019-06-06	NCR	Malabon	1	5000-10000 PHP	Secondly	0	0	0		0	0		1	0								0	1	1	0	0	0	0	0	0
1582	1	2001-05-11	18	3	1	2019-06-03	4	1	2019-06-04	2019-06-01	2	2019-06-05	2019-06-08	6	145	143		1	2019-06-06	NCR	Malabon	1	5000-10000 PHP	Secondly	0		0		2	1	8	1	0								0	1	1	0	0	0	0	0	0
1583	0	1998-02-25	21	3	0	2019-06-05	4	1	2019-06-06	2019-05-31	5	2019-06-06	2019-06-07	3	145	145		0		NCR	Quezon	1	5000-10000 PHP	Secondly	0	0	0		0	0		1	0								0	0	1	0	1	1	0	0	0
1584	0	1983-11-16	35	3	1	2019-06-06	4	1	2019-06-07	2019-05-31	6	2019-06-08	2019-06-11	6	145	144		1	2019-06-10	NCR	Manila	0	<5000 PHP	Primary	0		0		2	1	15	1	0								0	0	0	1	0	0	1	1	0
1585	0	1953-06-26	65	3	1	2019-06-06	4	1	2019-06-07	2019-06-05	1	2019-06-07	2019-06-09	4	145	144		0		NCR	Manila	0	<5000 PHP	Vocational	0		0		2	0		1	0								0	0	0	1	0	0	0	0	0
1586	0	2010-08-17	8	2	1	2019-06-10	4	0	2019-06-10	2019-06-06	4	2019-06-12	2019-06-24	15	145	145		1	2019-06-13	NCR	Caloocan	1	10000-15000 PHP	Vocational	0		0		0	0		1	0								0	1	1	0	1	1	0	1	0
1587	0	2014-09-02	4	1	0	2019-06-10	4	0	2019-06-10	2019-06-03	7	2019-06-12	2019-06-19	10	145	145		1	2019-06-13	Region 3		2	5000-10000 PHP	Primary	0	0	1	others	0	0		1	1	7	2019-06-10	0	12:00:00		Ceftriaxone	Other Hospital	1	1	1	1	0	0	1	0	0
1588	0	2016-01-18	3	1	0	2019-06-11	4	0	2019-06-11	2019-06-08	3	2019-06-14	2019-06-17	7	145	145		0		NCR	Malabon	1	<5000 PHP	Primary	0	0	0		0	0		1	1									1	0	0	0	1	1	1	0
1589	1	2010-12-25	8	2	1	2019-06-11	4	0	2019-06-11	2019-06-07	4	2019-06-12	2019-06-15	5	145	1		1	2019-06-13	NCR	Manila	0	5000	Secondly	0		0		0	0		1	1	3	2019-06-10	1	20:00:00	B-lactamase Inhibitors	Co-Amoxiclav	Private Clinic	1	0	1	0	1	1	0	0	0
1590	1	2013-06-30	5	2	0	2019-06-11	4	0	2019-06-11	2019-06-04	7	2019-06-16	2019-06-19	9	145	145		1	2019-06-13	NCR	Manila	0	5000-10000 PHP	Secondly	0	0	0		0	0		1	0								0	0	0	0	1	1	0	0	0
1591	0	1967-08-29	51	3	1	2019-06-13	4	0	2019-06-13	2019-06-04	9	2019-06-21	2019-06-23	11	145	144		1	2019-06-17	NCR	Manila	0	5000-10000 PHP	Secondly	0		1	others	1	0		1	0								0	0	1	1	0	1	1	0	0
1592	0	1996-01-26	23	3	1	2019-06-14	4	0	2019-06-14	2019-06-09	5	2019-06-15	2019-06-19	6	143	144		1	2019-06-17	Region 3		2	<5000 PHP	Primary	0		0		2	1	30	1	0								0	0	0	0	0	1	1	1	0
1593	0	2011-01-02	8	2	0	2019-06-14	4	0	2019-06-14	2019-06-04	10	2019-06-16	2019-06-17	4	144	144		1	2019-06-17	NCR	Malabon	1	<5000 PHP	Primary	0	0	0		0	0		1	1	7	2019-06-07	7	20:00:00	Cephalosporines	Cephalexin	Private Clinic	1	1	0	0	0	1	1	0	0
1594	0	1972-05-03	47	3	0	2019-06-17	4	0	2019-06-17	2019-06-10	7	2019-06-17	2019-06-19	3	145	145		1	2019-06-19	NCR	Manila	0	15000-20000 PHP	Vocational	1	0	1	others	0	1	15	1	1	3	2019-06-16	1	16:00:00	Macrolides	Azithromycin	Pharmacy	1	0	1	0	0	0	1	0	0
1595	1	1996-01-01	23	3	1	2019-06-17	4	1	2019-06-18	2019-06-13	4	2019-06-19	2019-06-21	5	145	145		1	2019-06-19	Region 4		2	<5000 PHP	Primary	0		0		2	1	4	1	0								0	1	0	1	0	0	1	0	0
1596	1	2003-01-14	16	2	1	2019-06-17	4	1	2019-06-18	2019-06-16	1	2019-06-24	2019-06-25	9	145	142		1	2019-06-20	Region 4		2	<5000 PHP	Vocational	0		1	others	0	0		1	0								0	1	1	1	0	0	1	0	0
1597	0	2015-10-31	3	1	0	2019-06-18	4	0	2019-06-18	2019-06-14	4	2019-07-01	2019-06-23	6	150	150		0		NCR	Quezon	1	15000-20000 PHP	Vocational	0	0	1	others	0	0		1	1	1	2019-06-17	1	22:00:00		Clindamycin	Public health center	1	1	1	0	0	0	0	0	0
1598	1	1991-05-12	28	3	0	2019-06-19	4	0	2019-06-19	2019-06-15	4	2019-06-20	2019-06-22	4	145	145		0		Region 4		2	<5000 PHP	Secondly	0	0	0		2	0		1	1	2	2019-06-19	0	12:00:00	Fluoroqunolones	Ciprofloxacin	Pharmacy	1	1	1	0	0	0	1	0	0
1599	0	1945-03-01	74	3	0	2019-06-19	4	0	2019-06-19	2019-06-03	16	2019-06-20	2019-06-23	5	145	145		0		NCR	Manila	0	10000-15000 PHP	Secondly	1	0	1	others	0	0	0	1	0								0	0	1	1	0	0	1	1	0
1600	0	1984-11-29	34	3	0	2019-06-21	4	0	2019-06-21	2019-06-14	7	2019-06-24	2019-06-27	7	145	145		1	2019-06-25	NCR	Manila	0	5000-10000 PHP	Secondly	0	0	0		2	1	8	1	0								0	0	1	0	0	0	0	0	0
1601	0	2016-12-21	2	1	1	2019-06-21	4	0	2019-06-21	2019-06-16	5	2019-06-25	2019-06-25	5	145	145		1	2019-06-25	NCR	Quezon	1	>20000 PHP	Vocational	0		1	others	0	0		1	1	1	2019-06-20	1	20:00:00		Amoxicillin	Private Clinic	1	1	0	0	0	1	1	0	0
1602	0	1942-04-24	77	3	1	2019-06-25	4	0	2019-06-25	2019-06-22	3	2019-06-27	2019-06-29	5	145	142		1	2019-06-25	Region 3		2	<5000 PHP	Primary	0		0		2	1	1	1	1	2	2019-06-24	1	18:00:00			Other Hospital	1	1	1	1	0	0	0	0	0
1603	1	1993-05-11	26	3	1	2019-06-25	4	0	2019-06-25	2019-06-19	6	2019-06-26	2019-06-28	4	145	145		1	2019-06-26	Region 4		2	5000-10000 PHP	Secondly	0		0		2	1	1	1	0								0	1	1	1	0	1	0	1	0
1604	1	1987-12-12	31	3	0	2019-06-25	4	0	2019-06-25	2019-06-18	7	2019-06-26	2019-06-26	2	141	141		1	2019-06-26	NCR	Makati	1	5000-10000 PHP	Secondly	0	0	0		2	1	6	1	1	3	2019-06-25	0	08:00:00		Ciprofloxacin	Other Hospital	1	1	0	0	0	1	0	0	0
1605	0	1961-03-24	58	3	0	2019-06-25	4	0	2019-06-25	2019-06-18	7	2019-06-26	2019-06-26	2	141	141		0		NCR	Paranaque	1	5000-10000 PHP	Secondly	0	0	1	others	0	0		1	1	1	2019-06-24	1	22:00:00		Others(vNitrofurantoin)	Public health center	1	1	0	0	0	0	1	0	0
1606	0	2014-12-23	4	1	1	2019-06-25	4	1	2019-06-26	2019-06-23	2	2019-06-26	2019-06-26	2	0	0		0		NCR	Manila	0	<5000 PHP	Secondly	0		0		0	0		1	0								0	1	0	0	0	0	1	1	0
1607	0	2017-09-30	1	1	1	2019-06-26	4	0	2019-06-26	2019-06-19	7	2019-06-28	2019-07-03	8	146	1		0		NCR	Manila	0	<5000 PHP	Secondly	0		0		0	0		1	1	3	2019-06-23	3	21:00:00	Cephalosporines	Cefuroxime	Other Hospital	1	1	1	0	0	1	1	0	1
1608	0	1979-03-24	40	3	1	2019-06-26	4	0	2019-06-26	2019-06-23	3	2019-07-13	2019-07-29	34	145	145		1	2019-06-28	NCR	Quezon	1	<5000 PHP	Secondly	0		0		2	0		1	0								0	1	1	1	0	1	0	0	0
1609	0	1971-09-29	47	3	1	2019-06-27	4	0	2019-06-27	2019-06-24	3	2019-06-28	2019-06-30	4	145	145		1	2019-06-27	NCR	Manila	0	5000-10000 PHP	Secondly	1		1	others	2	1	30	1	1	1	2019-06-26	1	20:00:00	B-lactamase Inhibitors	Co-Amoxiclav	Other Hospital	1	0	0	1	0	0	1	0	0
1610	0	1982-02-17	37	3	1	2019-06-26	4	1	2019-06-27	2019-06-20	6	2019-07-06	2019-07-02	7	145	145		1	2019-06-27	NCR	Manila	0	<5000 PHP	Secondly	0		0		2	0		1	0								0	0	1	1	0	0	1	0	0
1611	0	2017-07-24	1	1	0	2019-06-28	4	0	2019-06-28	2019-06-26	2	2019-07-03	2019-07-04	7	145	1		0		NCR	Quezon	1	10000-15000 PHP	Vocational	0	0	0		0	0		1	1	1	2019-06-26	2	16:00:00	B-lactamase Inhibitors	Co-Amoxiclav	Other Hospital	1	0	0	0	0	1	1	1	0
[truncated: 233 more columns]

## Sheet: dic
	variable	explanation
1	sid	study id
2	dengue	as clinical dengue enrollement or not	0: no, 1:dengue enrollement
3	dob	date of birth
4	age	years old
5	sex	sex	0:female, 1:male
6	do1sample	date of 1st sample taken
7	time1sample	1st sample extraction time
8	sa1st	research sample taken or not	0:not taken, 1:taken
9	bc1vol	blood culture total volume (g)
10	bc2vol	blood culture total volume (g)
11	urine	urine collection or not	0: collected, 1 not collected
12	dourine	date of urine collection
13	sample2nd	2nd smple colleced or not	0: collected, 1 not collected
14	do2ndsam	date of 2nd sample collection
15	ward	admission ward
16	region	region
17	ncr	city name if living NCR
18	doa	date of admission
19	doe	date of enroll
20	income	montlhy income	<5000	5000-10000	10000-15000	15000-2000	>20000
21	edu	educational level		none	Primary	Secondary	Vocationary	Tertiary
22	catslh	slh payment categories		A	B	C1	C2	C3	D
23	regmed	taking regular medication or not
24	pregnant	pregnant or not	0:no, 1:Yes
25	com	undrlying chronic diseases or not
26	Underlying disease	detail of chronic diseases
27	alcho	alchohol intake or not	0:no, 1:yes sometime, 2 yes everyday
28	smoking	smoking or not	0:no, 1:yes
29	packsmoking	smoking (packs/month)
30	medi	medication during current illness	0:no, 1:yes
31	abxb	antibiotic use before admission	0:no, 1:yes
32	duoabxb	duration of antibiotic use before admission (days)
33	dolastabx	date of last antibiotics before admission
34	timelastabx	Time of last ABx
35	abxclass	antibiotic category	"Penicillines";"Cephalosporines";"B-lactamase Inhibitors";"Macrolides";"Fluoroqunolones";"Tetracyclines";"Chloramphenicol";"Co-trimo";"Unknown";"Others"
36	abxname	ABx name
37	resource	where obtain the antibiotics	"Pharmacy";"Other Hospital";"Public health center";"Private Clinic";"SLH";"Relatives/Friends/Neighbor";"Charity";"Others"
38	presc	with or without prescription	0:without prescription, 1: with prescription, 9 unknown
39	refer	referral from other health facilities
40	dofs	date of first symptom
41	symptom		0:no, 1:yes
42	sbp	systolic BP
43	dbp	dyastolic BP
	mbp	mean BP mean arterial pressure
44	pr	pulse rate
45	rr	respiratory rate
46	spo2	%
47	sp02L	O2 L
48	o2type	O2 administration method		room air ;"nasal cannula";"mask ";"resarvoir mask";"ventilation"
49	bt	body temperature ℃
50	uncon	unconsiousness or not	0:no, 1:yes
51	gcs	glas coma scale
52	bw	body weight (kg)	0:no, 1:yes
53	height	height (cm)	0:no, 1:yes
54	ane	anemic conjunctiva	0:no, 1:yes
55	icte	Icteric conjunctiva	0:no, 1:yes
56	conju	Conjunctival suffsion	0:no, 1:yes
57	rale	Lung rale	0:no, 1:yes
58	mur	Heart murmur	0:no, 1:yes
59	abdten	Abdominal tenderness	0:no, 1:yes
60	hepa	Hepatomegaly
61	splen	Splenomegaly
62	cvan	CVA knocking tenderness
63	edema
64	skincon	Skin congestion
65	rash	rash
66	rash type
67	rash body part
68	lymphade	Lymph node swelling
69	Lymph node body part	????
70	joint	Joint swelling
71	calften	calf tenderness
72	neckstiff	Neck stiffness
73	paralysis	Paralysis
74	u5severe	under 5 severe condition	0: none, 1: at least one condition, 9: not under 5 or unknown
75	u5severede	under 5 severe condition, detail
76	wbc	WBC (10*9/L)
77	neut	(%)
78	lymph	(%)
79	eosino	(%)
80	mono	(%)
81	baso	(%)
82	hb	Hemoblobin (g/L)
83	hct	Hematocrit
84	plt	Platelet (10*9/L)
85	tbil	T-bilirubin (mg/dL)
86	ast	AST (mg/dL)
87	alt	ALT (mg/dL)
88	bun	BUN (mg/dL)
89	crea	Crea (mg/dL)
90	culsample1	sample type for bacterial culture 1
91	Other culture order1	????
92	isolateother1	isolate, baceria name of bacterial culture 1
93	culsample2	sample type for bacterial culture 2
94	Other culture order2	????
95	isolateother2	isolate, baceria name of bacterial culture 2
96	csf	CSF was taken or not	0: not taken, 1: taken, 9 unknown
97	docsf	date of CSF taken
98	csfpro	CSF protein (mg/dL)
99	csfsugar	CSF sugar (mg/dL)
100	csfcell	CSF cells (/mm3)
101	csfneut	CSF Neut (%)
102	csflymph	CSF Lymph (%)
103	rdtdengue	RDT dengue result	(0;negative, 1;NS1 positive, 2; IgM positive, 3;IgG positive, 4;NS1andIgM positive and IgG nega, 5;NS1nega and IgMposi and IgG posi, 6;all posi, 7;NS1 Posi, IgMneg, IgGposi, 9;not done)
104	rdtlept	RDT Leptospirosis result	0:negative, 1:IgM positive, 9: not done
105	rdtchikungunya	RDT Chikungunya	0:negative, 1:IgM positive, 9: not done
106	rdtsal	RDT Salmonella	0:negative, 1:IgM positive, 9: not done
107	xray	Xray result	no order ;"normal ";"abnormal "
108	us	US findings	no order ;"abnormal ";"hepatomegaly ";"splenomegaly ";"Liver abscess";"others"
109	erdiag	ER diagnosis
110	addiag	admission diagnosis
111	findiag	final diagnosis
112	otherdiag	other diagnosis
113	dodefever	date of defeverness
114	dod	date of discharge
115	dofollow1st	date of 1st followup	recovery better but not fully recovered not change worse sequelae died discharge w/o recovery transferred to specialists
116	outcome1st	1st outcome
117	dofollow2nd	date of 2nd followup
118	outcome2nd	2nd outcome	recovery better but not fully recovered not change worse sequelae died discharge w/o recovery transferred to specialists
119	sofa	SOFA score
	sofac	sofa score category mild <=3, moderate:4-6, severe:7>=	0: <=3, 1:moderate:4-6, 2:severe:7>=
120	sirs	SIRS criteria	0: not met, 1 :met crietria
	qsofa	quick sofa score
	qsofa2more	quick sofa score ≥2 vs. <2	0 : <2 1:>=2
	shock	mean BP mean arterial pressure<=70	0: mBP>70, 1mBP<=70
	lowgcs	GCS <15	0:GCS15. 1: GCS<15
	abxa	Antibiotics given within 24 hours after the admission	0: not given or given after 24hours, 1; given
121	abx1	1st Antibiotic use or not	0: not given, 1: given
122	doabx1sta	date of start 1st ABx
123	doabx1end	date of end 1st ABx
124	classabx1	antibiotic class of 1st ABx
125	nameabx1	antibiotic name of 1st ABx
126	doseabx1	dose of 1st ABx
127	freqabx1	frequerncy of 1st ABx per day
128	unitabx1	unit of 1st ABx
129	abx2	2nd Antibiotic use or not
130	doabx2sta	date of ndart 2nd ABx
131	doabx2end	date of end 2nd ABx
132	classabx2	antibiotic class of 2nd ABx
133	nameabx2	antibiotic name of 2nd ABx
134	doseabx2	dose of 2nd ABx
135	freqabx2	frequerncy of 2nd ABx per day
136	unitabx2	unit of 2nd ABx
137	abx3	3rd Antibiotic use or not
138	doabx3sta	date of start 3rd ABx
139	doabx3end	date of end 3rd ABx
140	classabx3	antibiotic class of 3rd ABx
141	nameabx3	antibiotic name of 3rd ABx
142	doseabx3	dose of 3rd ABx
143	freqabx3	frequerncy of 3rd ABx per day
144	unitabx3	unit of 3rd ABx
145	abx4	4th Antibiotic use or not
146	doabx4sta	date of start 4th ABx
147	doabx4end	date of end 4th ABx
148	classabx4	antibiotic class of 4th ABx
149	nameabx4	antibiotic name of 4th ABx
150	doseabx4	dose of 4th ABx
151	freqabx4	frequerncy of 4th ABx per day
152	unitabx4	unit of 4th ABx
153	abx5	5th Antibiotic use or not
154	doabx5sta	date of start 5th ABx
155	doabx5end	date of end 5th ABx
156	classabx5	antibiotic class of 5th ABx
157	nameabx5	antibiotic name of 5th ABx
158	doseabx5	dose of 5th ABx
159	freqabx5	frequerncy of 5th ABx per day
160	unitabx5	unit of 5th ABx
161	abx6	6th Antibiotic use or not
162	doabx6sta	date of start 6th ABx
163	doabx6end	date of end 6th ABx
164	classabx6	antibiotic class of 6th ABx
165	nameabx6	antibiotic name of 6th ABx
166	doseabx6	dose of 6th ABx
167	freqabx6	frequerncy of 6th ABx per day
168	unitabx6	unit of 6th ABx
169	iv	IV fluid given or not	0: no, 1: yes
170	doivstat	date of start IV fluid
171	doivend	date of end IV fluid
172	vaso	Vasopressor
173	dovasostat	date of start Vasopressor
174	dovasoend	date of end Vasopressor
175	btrans	Blood transfusion
176	dobtransstat	date of start Blood transfusion
177	dobtransend	date of end Blood transfusion
178	o2
179	doo2stat	date of start o2
180	doo2end	date of end o2
181	diu	diuretics
182	doodiustat	date of start diuretics
183	doodiuend	date of end diuretics
184	venti	Ventilator
185	doventistat	date of start Ventilator
186	doventiend	date of end Ventilator
187	steroid
188	steroidtype	Type of steroid	Hydrocortisone Methylprednisolone Prednisolone Prednisone Dexamethasone Cortisone Betamethasone Other
189	dosteroidstat	date of start steroid
190	dosteroidend	date of end steroid
191	othertreat	other treatments	0:none, 1:yes
192	icu	ICU stay or not
193	doicustat	date of start ICU stay
194	doicuend	date of end ICU stay
195	dialysis	dialysis
196	dodialysisstat	date of start dialysis
197	dodialysisend	date of end dialysis
	crp	CRP mg/dl
	pct	Procalcitonin
	dengue_ns1	Dengue NS1 (SD kit)	0:negative, 1;positive
	dengue_igm	Dengue IgM (SD kit)	0:negative, 1;positive
	dengue_igg	Dengue IgG (SD kit)	0:negative, 1;positive
	dengue_pcr	Dengue RT-PCR	0:negative, 1;positive
	diph_pcr	Diphtheria PCR	0:negative, 1;positive, " ": not perform
	diph_cul	Diphtheria Culture	0:negative, 1;positive, " ": not perform
	meningo_pcr	Meningogoccus PCR	0:negative, 1;positive, " ": not perform
	meningo_cul	Meningogoccus Culture	0:negative, 1;positive, " ": not perform
	bc	Blood culture positive or not	0:negative, 1;positive
	lept_cul	Leptospirosis culture	0:negative, 1;positive, " ": not perform
	lept_qpcr	Leptospirosis real time PCR	0:negative, 1;positive, " ": not perform
	lept_eliza1st	Leptospirosis Eliza 1st sample	0:negative, 1;positive, " ": not perform
	lept_eliza2nd	Leptospirosis Eliza 2nd sample	0:negative, 1;positive, " ": not perform
	xray_con	Xray	0:normal, 1:abnormal, " ": no X ray
	dengue	Dengue labo positive (IgM or NS1 or RT-PCR positive)	1:positive
	lept	Leptospirosis positive (culture or qPCR or ELIZA1st or Eliza2nd)	2:positive
	bacteremia	Bacteremia positive (Bcpositive)	3:positive
	pneumo	Xray confirmed pneumonia	4:positive
	diph	Diphtheria (PCR or culture positive)	5:positive
	meningo	Meningococcus (PCR or culture positive)	6:positive
	diag_con	Laboratory confirmed diagnosis	0: no diagnosis, 1 laboratory confirmed
	labo_con	laboratory diagnosis type	0: none, 1:dengue, 2: Leptospirosis, 3 Bacgteremia, 4 Xray confirmed case 5: Diphtheria, 6: Meningococcus
	double_infec_check	doble infection	0: none, 1: double infection
	lept_cul	Leptospirosis blood culture positive	1:blood culture positive
	lept_culpcr	Leptospirosis culture or (Lamp PCR and real time PCR) positive
	dengue_ns1pcr	Dengue NS1 positive or RT-PCR positive
	double_infect	Positive any other laboratory results
	clinical_diag	clinical diagnosis
	other_comments	other diagnosis
	probable_diag	probable diagnosis (confirm + probable)	0: none, 1:dengue, 2: Leptospirosis, 3 Bacgteremia, 4 Xray confirmed case 5: Diphtheria, 6: Meningococcus 7:skin infection						Dengue: NSI or PCR or IgM positive, Lepto PCR or culture or IgM positive bacteremia Xray confirmed celluritis
	probable_bac	probable diagnosis bacteria diagnosis or not (confirm + probable)	0:dengue, 1 probable diagnosis 1~ 6
	outcome_final	final outcome	0:survive, 1:died
	proven_diag	proven diagnosis	0:dengue NS1 or PCR 2:Lepto : PCR or culture or seroconversion 3:bacteremia 5:diphtheria 6:meningococcus
	proven_bac	proven diagnosis	0:proven dengue, 1 proven bacteria diagnosis 2,3,5,6
	sea	season of the admission	1: 2015/7/1~ 2016/6/30, 2:2016/7/1/~2017/6/30, 3:2017/7/1~2018/6/30 4:2018/7/1~2019/6/30
	ageg	age group	1: under 5 2: 5 ~ 17 3: 18 over
	dengue_con_pro	dengue confirm or probable	1:confirm 2: probable
	bac_con_pro	bacterial infection confirm or probable	1:confirm 2: probable
	lept_con_pro	leptospirosis confirm or probable	1:confirm 3: probable
	area	living in Manila or NCR ouside Manila or other region?	0:Manila city, 1:NCR outside Manila city, 2: other region not NCR
	lept_cul_srovar	Leptspirosis serovar culture result
	lept_pcr_srovar	Leptspirosis serovar pcr sequence result
	lept_cul_srovarpcr	Leptspirosis serovar pcr sequence result or culture result
	inidiag	initial diagnosis, diagnosis for the enrollment
	dulastabx	duration between last antibiotic use and admission (days)
	di	proven and probable diagnosis	1:dengue proven, 2:dengue probable, 3:lepto proven, 4:lepto probable, 5:bacteremia, 6:Xray confirmed pneumonia, 7:Diphtheria, 8: BC negative PCR positive meningococcus,9:skin infection
	de_con	dengue confirm dengu NS1 or PCR	1:positive, 0: negative
	de_pro	dengue probabale dengue IgM_ELIZA	1:positive, 0: negative
	de_po	dengue_possible dengue NS1(-) and PCR(-) and RDT IgM(+)	1:positive, 0: negative
	le_co	Lepto confrim LampPCR or Culture or ELIZA igM seroconversion	1:positive, 0: negative
	le_pro	Lepto_probable lepto confirm plus Acute Phase ELIZA IgM positive 400titer	1:positive, 0: negative
	bac	bacteremia blood culture positive	1:positive, 0: negative
	pne	Xray confirmed pneumonia	1:positive, 0: negative
	diph	diphtheria culture or pcr	1:positive, 0: negative
	men	Meningococcus (PCR or culture positive)	1:positive, 0: negative
	ski	clinical skin infection	1:positive, 0: negative
	dengue_ns1	dengue RDT test SD NS1 result	1:positive, 0: negative " ": no test
	dengue_igm	dengue RDT test SD IgM result	1:positive, 0: negative " ": no test
	dengue_igg	dengue RDT test SD IgG result	1:positive, 0: negative " ": no test
	dengue_pcr	dengue RT-PCR result	1:positive, 0: negative " ": no test
	diph_pcr	diphtheria tox-gene PCR direct swab	1:positive, 0: negative " ": no test
	diph_cul	diphtheria special culture result	1:positive, 0: negative " ": no test
	meningo_pcr	meningococcus buffy coat PCR result	1:positive, 0: negative " ": no test
	meningo_cul	meningococcus Blood culture result	1:positive, 0: negative " ": no test
	lept_cul	leptospirosis special culture result	1:positive, 0: negative " ": no test
	lept_qpcr	Leptospirosis PCR (Lamp and qPCR)	1:positive, 0: negative " ": no test
	lept_eliza1st	Leptospirosis Patoc ELIZA 1st sample (acute phase)	1:positive, 0: negative " ": no test
	lept_eliza2nd	Leptospirosis Patoc ELIZA 2nd sample (convalecent sample)	1:positive, 0: negative " ": no test
	leptoserocon	Leptospirosis seroconversion	1:positive, 0: negative " ": no test
	xray_con	Xray suspected pneumonia	1:positive, 0: negative " ": no test
	dua	duration of admission (days)	dod-doa+1
	type_bc	blood culture bottle type:	1: BacT/Alert (BIOMERIEUX) pedia 2: BacT/Alert (BIOMERIEUX) adult 3: Bactec: pedia 4: Bacted adult
	no_bc_bottle	number of blood culture bottle
	total_blood_volume	total blood culture volume (g)
